# Supplementary material for: Single-cell gene expression analysis reveals regulators of distinct cell subpopulations among developing human neurons
Source: HighWire-hosted journal article supplement (doi:10.1101/gr.223313.117), 2017-10-13
Supplement: Supplemental_Tables.xlsx [file Supplemental_Tables.xlsx]

## Sheet: Table_S1
Time point	Day 0	Day 1	Day 5	Day 7	Day 10	Day 30
Number of captured cells	88	95	96	92	92	90
Average cell size (um)	13.5	13.7	12	10.1	9.7	11.5
average cDNA amount(ng)	12.15	12.69	10.125	5.67	4.05	4.86
Average Reads number(M)	2.14	2.16	2.03	2.08	2.12	2.15

## Sheet: Table_S2
8957 genes
gencode_id	ensembl_gene_id	Lastest version of gene symbol (from HGNC database)
ENSG00000145416.9	ENSG00000145416	MARCH1
ENSG00000186205.8	ENSG00000186205	MARC1
ENSG00000168385.13	ENSG00000168385	SEPT2
ENSG00000100167.15	ENSG00000100167	SEPT3
ENSG00000198060.5	ENSG00000198060	MARCH5
ENSG00000145495.10	ENSG00000145495	MARCH6
ENSG00000125354.18	ENSG00000125354	SEPT6
ENSG00000136536.10	ENSG00000136536	MARCH7
ENSG00000122545.13	ENSG00000122545	SEPT7
ENSG00000165406.11	ENSG00000165406	MARCH8
ENSG00000164402.9	ENSG00000164402	SEPT8
ENSG00000184640.13	ENSG00000184640	SEPT9
ENSG00000186522.10	ENSG00000186522	SEPT10
ENSG00000138758.7	ENSG00000138758	SEPT11
ENSG00000094914.8	ENSG00000094914	AAAS
ENSG00000109576.9	ENSG00000109576	AADAT
ENSG00000158122.7	ENSG00000158122	AAED1
ENSG00000127837.5	ENSG00000127837	AAMP
ENSG00000131043.7	ENSG00000131043	AAR2
ENSG00000090861.11	ENSG00000090861	AARS
ENSG00000266967.2	ENSG00000266967	AARSD1
ENSG00000157426.9	ENSG00000157426	AASDH
ENSG00000149313.6	ENSG00000149313	AASDHPPT
ENSG00000008311.10	ENSG00000008311	AASS
ENSG00000183044.7	ENSG00000183044	ABAT
ENSG00000165029.11	ENSG00000165029	ABCA1
ENSG00000251595.3	ENSG00000251595	ABCA11P
ENSG00000154265.11	ENSG00000154265	ABCA5
ENSG00000135776.4	ENSG00000135776	ABCB10
ENSG00000131269.11	ENSG00000131269	ABCB7
ENSG00000103222.14	ENSG00000103222	ABCC1
ENSG00000125257.9	ENSG00000125257	ABCC4
ENSG00000114770.12	ENSG00000114770	ABCC5
ENSG00000069431.6	ENSG00000069431	ABCC9
ENSG00000117528.7	ENSG00000117528	ABCD3
ENSG00000119688.16	ENSG00000119688	ABCD4
ENSG00000164163.6	ENSG00000164163	ABCE1
ENSG00000204574.8	ENSG00000204574	ABCF1
ENSG00000033050.3	ENSG00000033050	ABCF2
ENSG00000161204.7	ENSG00000161204	ABCF3
ENSG00000144827.4	ENSG00000144827	ABHD10
ENSG00000106077.14	ENSG00000106077	ABHD11
ENSG00000139826.5	ENSG00000139826	ABHD13
ENSG00000107362.9	ENSG00000107362	ABHD17B
ENSG00000140526.12	ENSG00000140526	ABHD2
ENSG00000100439.6	ENSG00000100439	ABHD4
ENSG00000011198.3	ENSG00000011198	ABHD5
ENSG00000136754.12	ENSG00000136754	ABI1
ENSG00000138443.11	ENSG00000138443	ABI2
ENSG00000097007.13	ENSG00000097007	ABL1
ENSG00000143322.15	ENSG00000143322	ABL2
ENSG00000099204.14	ENSG00000099204	ABLIM1
ENSG00000159842.10	ENSG00000159842	ABR
ENSG00000146386.7	ENSG00000146386	ABRACL
ENSG00000163322.9	ENSG00000163322	ABRAXAS1
ENSG00000165660.7	ENSG00000165660	ABRAXAS2
ENSG00000146109.3	ENSG00000146109	ABT1
ENSG00000167315.13	ENSG00000167315	ACAA2
ENSG00000111271.10	ENSG00000111271	ACAD10
ENSG00000177646.13	ENSG00000177646	ACAD9
ENSG00000117054.9	ENSG00000117054	ACADM
ENSG00000196177.8	ENSG00000196177	ACADSB
ENSG00000072778.15	ENSG00000072778	ACADVL
ENSG00000114331.8	ENSG00000114331	ACAP2
ENSG00000075239.9	ENSG00000075239	ACAT1
ENSG00000120437.7	ENSG00000120437	ACAT2
ENSG00000182827.8	ENSG00000182827	ACBD3
ENSG00000107897.14	ENSG00000107897	ACBD5
ENSG00000102977.9	ENSG00000102977	ACD
ENSG00000100813.10	ENSG00000100813	ACIN1
ENSG00000144476.5	ENSG00000144476	ACKR3
ENSG00000131473.12	ENSG00000131473	ACLY
ENSG00000122729.14	ENSG00000122729	ACO1
ENSG00000100412.11	ENSG00000100412	ACO2
ENSG00000112304.6	ENSG00000112304	ACOT13
ENSG00000097021.15	ENSG00000097021	ACOT7
ENSG00000101473.12	ENSG00000101473	ACOT8
ENSG00000123130.12	ENSG00000123130	ACOT9
ENSG00000161533.7	ENSG00000161533	ACOX1
ENSG00000143727.11	ENSG00000143727	ACP1
ENSG00000134940.9	ENSG00000134940	ACRV1
ENSG00000176715.11	ENSG00000176715	ACSF3
ENSG00000151726.9	ENSG00000151726	ACSL1
ENSG00000123983.9	ENSG00000123983	ACSL3
ENSG00000068366.15	ENSG00000068366	ACSL4
ENSG00000164398.8	ENSG00000164398	ACSL6
ENSG00000075624.9	ENSG00000075624	ACTB
ENSG00000184009.5	ENSG00000184009	ACTG1
ENSG00000136518.12	ENSG00000136518	ACTL6A
ENSG00000131966.9	ENSG00000131966	ACTR10
ENSG00000138107.7	ENSG00000138107	ACTR1A
ENSG00000115073.6	ENSG00000115073	ACTR1B
ENSG00000138071.9	ENSG00000138071	ACTR2
ENSG00000115091.7	ENSG00000115091	ACTR3
ENSG00000075089.5	ENSG00000075089	ACTR6
ENSG00000113812.9	ENSG00000113812	ACTR8
ENSG00000115170.9	ENSG00000115170	ACVR1
ENSG00000121989.10	ENSG00000121989	ACVR2A
ENSG00000114739.9	ENSG00000114739	ACVR2B
ENSG00000119640.4	ENSG00000119640	ACYP1
ENSG00000196839.8	ENSG00000196839	ADA
ENSG00000093072.11	ENSG00000093072	ADA2
ENSG00000168803.10	ENSG00000168803	ADAL
ENSG00000137845.10	ENSG00000137845	ADAM10
ENSG00000148848.10	ENSG00000148848	ADAM12
ENSG00000135074.11	ENSG00000135074	ADAM19
ENSG00000229186.3	ENSG00000229186	ADAM1A
ENSG00000008277.10	ENSG00000008277	ADAM22
ENSG00000114948.8	ENSG00000114948	ADAM23
ENSG00000168615.7	ENSG00000168615	ADAM9
ENSG00000151388.6	ENSG00000151388	ADAMTS12
ENSG00000145808.4	ENSG00000145808	ADAMTS19
ENSG00000173157.12	ENSG00000173157	ADAMTS20
ENSG00000049192.10	ENSG00000049192	ADAMTS6
ENSG00000156218.8	ENSG00000156218	ADAMTSL3
ENSG00000160710.11	ENSG00000160710	ADAR
ENSG00000065457.6	ENSG00000065457	ADAT1
ENSG00000189007.11	ENSG00000189007	ADAT2
ENSG00000063761.11	ENSG00000063761	ADCK1
ENSG00000164742.10	ENSG00000164742	ADCY1
ENSG00000078549.10	ENSG00000078549	ADCYAP1R1
ENSG00000087274.12	ENSG00000087274	ADD1
ENSG00000075340.18	ENSG00000075340	ADD2
ENSG00000148700.9	ENSG00000148700	ADD3
ENSG00000152990.9	ENSG00000152990	ADGRA3
ENSG00000135298.9	ENSG00000135298	ADGRB3
ENSG00000205336.7	ENSG00000205336	ADGRG1
ENSG00000117114.15	ENSG00000117114	ADGRL2
ENSG00000150471.11	ENSG00000150471	ADGRL3
ENSG00000164199.11	ENSG00000164199	ADGRV1
ENSG00000197894.6	ENSG00000197894	ADH5
ENSG00000147576.11	ENSG00000147576	ADHFE1
ENSG00000006831.9	ENSG00000006831	ADIPOR2
ENSG00000156110.9	ENSG00000156110	ADK
ENSG00000101126.11	ENSG00000101126	ADNP
ENSG00000101544.4	ENSG00000101544	ADNP2
ENSG00000181915.3	ENSG00000181915	ADO
ENSG00000116863.10	ENSG00000116863	ADPRHL2
ENSG00000170222.11	ENSG00000170222	ADPRM
ENSG00000130706.8	ENSG00000130706	ADRM1
ENSG00000239900.7	ENSG00000239900	ADSL
ENSG00000035687.9	ENSG00000035687	ADSS
ENSG00000139154.10	ENSG00000139154	AEBP2
ENSG00000181026.13	ENSG00000181026	AEN
ENSG00000130396.16	ENSG00000130396	AFDN
ENSG00000198221.7	ENSG00000198221	AFDN-AS1
ENSG00000172493.16	ENSG00000172493	AFF1
ENSG00000144218.14	ENSG00000144218	AFF3
ENSG00000072364.8	ENSG00000072364	AFF4
ENSG00000223959.4	ENSG00000223959	AFG3L1P
ENSG00000183077.11	ENSG00000183077	AFMID
ENSG00000119844.10	ENSG00000119844	AFTPH
ENSG00000038002.4	ENSG00000038002	AGA
ENSG00000157985.13	ENSG00000157985	AGAP1
ENSG00000188234.9	ENSG00000188234	AGAP4
ENSG00000084693.11	ENSG00000084693	AGBL5
ENSG00000173744.13	ENSG00000173744	AGFG1
ENSG00000164252.8	ENSG00000164252	AGGF1
ENSG00000006530.11	ENSG00000006530	AGK
ENSG00000162688.11	ENSG00000162688	AGL
ENSG00000092847.6	ENSG00000092847	AGO1
ENSG00000123908.7	ENSG00000123908	AGO2
ENSG00000126070.14	ENSG00000126070	AGO3
ENSG00000134698.10	ENSG00000134698	AGO4
ENSG00000204310.6	ENSG00000204310	AGPAT1
ENSG00000026652.9	ENSG00000026652	AGPAT4
ENSG00000155189.7	ENSG00000155189	AGPAT5
ENSG00000018510.8	ENSG00000018510	AGPS
ENSG00000135049.11	ENSG00000135049	AGTPBP1
ENSG00000177674.11	ENSG00000177674	AGTRAP
ENSG00000153207.10	ENSG00000153207	AHCTF1
ENSG00000101444.8	ENSG00000101444	AHCY
ENSG00000168710.13	ENSG00000168710	AHCYL1
ENSG00000158467.12	ENSG00000158467	AHCYL2
ENSG00000135541.16	ENSG00000135541	AHI1
ENSG00000124942.9	ENSG00000124942	AHNAK
ENSG00000100591.3	ENSG00000100591	AHSA1
ENSG00000173209.18	ENSG00000173209	AHSA2
ENSG00000186063.8	ENSG00000186063	AIDA
ENSG00000126878.8	ENSG00000126878	AIF1L
ENSG00000156709.9	ENSG00000156709	AIFM1
ENSG00000146416.12	ENSG00000146416	AIG1
ENSG00000164022.12	ENSG00000164022	AIMP1
ENSG00000106305.5	ENSG00000106305	AIMP2
ENSG00000110711.5	ENSG00000110711	AIP
ENSG00000129474.11	ENSG00000129474	AJUBA
ENSG00000004455.12	ENSG00000004455	AK2
ENSG00000147853.12	ENSG00000147853	AK3
ENSG00000162433.10	ENSG00000162433	AK4
ENSG00000085231.9	ENSG00000085231	AK6
ENSG00000155085.11	ENSG00000155085	AK9
ENSG00000121057.8	ENSG00000121057	AKAP1
ENSG00000023516.7	ENSG00000023516	AKAP11
ENSG00000131016.12	ENSG00000131016	AKAP12
ENSG00000170776.15	ENSG00000170776	AKAP13
ENSG00000197976.6	ENSG00000197976	AKAP17A
ENSG00000151320.6	ENSG00000151320	AKAP6
ENSG00000105127.4	ENSG00000105127	AKAP8
ENSG00000011243.13	ENSG00000011243	AKAP8L
ENSG00000127914.12	ENSG00000127914	AKAP9
ENSG00000174574.11	ENSG00000174574	AKIRIN1
ENSG00000135334.8	ENSG00000135334	AKIRIN2
ENSG00000117448.9	ENSG00000117448	AKR1A1
ENSG00000085662.9	ENSG00000085662	AKR1B1
ENSG00000187134.8	ENSG00000187134	AKR1C1
ENSG00000151632.12	ENSG00000151632	AKR1C2
ENSG00000117020.12	ENSG00000117020	AKT3
ENSG00000166971.12	ENSG00000166971	AKTIP
ENSG00000148218.11	ENSG00000148218	ALAD
ENSG00000023330.10	ENSG00000023330	ALAS1
ENSG00000170017.8	ENSG00000170017	ALCAM
ENSG00000161618.5	ENSG00000161618	ALDH16A1
ENSG00000059573.4	ENSG00000059573	ALDH18A1
ENSG00000137124.6	ENSG00000137124	ALDH1B1
ENSG00000136010.9	ENSG00000136010	ALDH1L2
ENSG00000111275.8	ENSG00000111275	ALDH2
ENSG00000072210.14	ENSG00000072210	ALDH3A2
ENSG00000112294.8	ENSG00000112294	ALDH5A1
ENSG00000119711.8	ENSG00000119711	ALDH6A1
ENSG00000164904.11	ENSG00000164904	ALDH7A1
ENSG00000143149.8	ENSG00000143149	ALDH9A1
ENSG00000149925.12	ENSG00000149925	ALDOA
ENSG00000109107.9	ENSG00000109107	ALDOC
ENSG00000139133.2	ENSG00000139133	ALG10
ENSG00000253710.1	ENSG00000253710	ALG11
ENSG00000101901.6	ENSG00000101901	ALG13
ENSG00000172339.9	ENSG00000172339	ALG14
ENSG00000119523.8	ENSG00000119523	ALG2
ENSG00000214160.5	ENSG00000214160	ALG3
ENSG00000120697.4	ENSG00000120697	ALG5
ENSG00000088035.11	ENSG00000088035	ALG6
ENSG00000159063.8	ENSG00000159063	ALG8
ENSG00000086848.10	ENSG00000086848	ALG9
ENSG00000100601.5	ENSG00000100601	ALKBH1
ENSG00000189046.6	ENSG00000189046	ALKBH2
ENSG00000166199.8	ENSG00000166199	ALKBH3
ENSG00000160993.3	ENSG00000160993	ALKBH4
ENSG00000091542.8	ENSG00000091542	ALKBH5
ENSG00000137760.10	ENSG00000137760	ALKBH8
ENSG00000116127.13	ENSG00000116127	ALMS1
ENSG00000230002.2	ENSG00000230002	ALMS1-IT1
ENSG00000162551.9	ENSG00000162551	ALPL
ENSG00000003393.10	ENSG00000003393	ALS2
ENSG00000183684.6	ENSG00000183684	ALYREF
ENSG00000110497.10	ENSG00000110497	AMBRA1
ENSG00000123505.10	ENSG00000123505	AMD1
ENSG00000249286.1	ENSG00000249286	AMD1P3
ENSG00000165566.11	ENSG00000165566	AMER2
ENSG00000101935.5	ENSG00000101935	AMMECR1
ENSG00000144233.5	ENSG00000144233	AMMECR1L
ENSG00000151743.6	ENSG00000151743	AMN1
ENSG00000126016.9	ENSG00000126016	AMOT
ENSG00000166025.13	ENSG00000166025	AMOTL1
ENSG00000114019.10	ENSG00000114019	AMOTL2
ENSG00000116337.11	ENSG00000116337	AMPD2
ENSG00000078053.12	ENSG00000078053	AMPH
ENSG00000145020.10	ENSG00000145020	AMT
ENSG00000196704.7	ENSG00000196704	AMZ2
ENSG00000214174.4	ENSG00000214174	AMZ2P1
ENSG00000153107.7	ENSG00000153107	ANAPC1
ENSG00000164162.8	ENSG00000164162	ANAPC10
ENSG00000141552.13	ENSG00000141552	ANAPC11
ENSG00000129055.8	ENSG00000129055	ANAPC13
ENSG00000166295.4	ENSG00000166295	ANAPC16
ENSG00000053900.6	ENSG00000053900	ANAPC4
ENSG00000089053.8	ENSG00000089053	ANAPC5
ENSG00000196510.8	ENSG00000196510	ANAPC7
ENSG00000214274.5	ENSG00000214274	ANG
ENSG00000013523.5	ENSG00000013523	ANGEL1
ENSG00000174606.8	ENSG00000174606	ANGEL2
ENSG00000154188.5	ENSG00000154188	ANGPT1
ENSG00000145362.12	ENSG00000145362	ANK2
ENSG00000151150.16	ENSG00000151150	ANK3
ENSG00000185722.12	ENSG00000185722	ANKFY1
ENSG00000131503.16	ENSG00000131503	ANKHD1
ENSG00000254996.1	ENSG00000254996	ANKHD1-EIF4EBP3
ENSG00000001629.5	ENSG00000001629	ANKIB1
ENSG00000106524.4	ENSG00000106524	ANKMY2
ENSG00000088448.10	ENSG00000088448	ANKRD10
ENSG00000167522.10	ENSG00000167522	ANKRD11
ENSG00000101745.11	ENSG00000101745	ANKRD12
ENSG00000076513.12	ENSG00000076513	ANKRD13A
ENSG00000118454.8	ENSG00000118454	ANKRD13C
ENSG00000132466.13	ENSG00000132466	ANKRD17
ENSG00000230453.5	ENSG00000230453	ANKRD18B
ENSG00000187984.8	ENSG00000187984	ANKRD19P
ENSG00000107890.12	ENSG00000107890	ANKRD26
ENSG00000105186.10	ENSG00000105186	ANKRD27
ENSG00000206560.6	ENSG00000206560	ANKRD28
ENSG00000135976.12	ENSG00000135976	ANKRD36
ENSG00000196912.8	ENSG00000196912	ANKRD36B
ENSG00000174501.10	ENSG00000174501	ANKRD36C
ENSG00000213337.4	ENSG00000213337	ANKRD39
ENSG00000154945.6	ENSG00000154945	ANKRD40
ENSG00000137494.9	ENSG00000137494	ANKRD42
ENSG00000183831.6	ENSG00000183831	ANKRD45
ENSG00000186106.7	ENSG00000186106	ANKRD46
ENSG00000151458.7	ENSG00000151458	ANKRD50
ENSG00000100124.8	ENSG00000100124	ANKRD54
ENSG00000135299.12	ENSG00000135299	ANKRD6
ENSG00000064999.12	ENSG00000064999	ANKS1A
ENSG00000165138.12	ENSG00000165138	ANKS6
ENSG00000163516.9	ENSG00000163516	ANKZF1
ENSG00000011426.6	ENSG00000011426	ANLN
ENSG00000171714.10	ENSG00000171714	ANO5
ENSG00000177119.11	ENSG00000177119	ANO6
ENSG00000011201.6	ENSG00000011201	ANOS1
ENSG00000140350.11	ENSG00000140350	ANP32A
ENSG00000136938.8	ENSG00000136938	ANP32B
ENSG00000143401.10	ENSG00000143401	ANP32E
ENSG00000169604.15	ENSG00000169604	ANTXR1
ENSG00000163297.12	ENSG00000163297	ANTXR2
ENSG00000182718.12	ENSG00000182718	ANXA2
ENSG00000164111.10	ENSG00000164111	ANXA5
ENSG00000138279.11	ENSG00000138279	ANXA7
ENSG00000138660.7	ENSG00000138660	AP1AR
ENSG00000166747.8	ENSG00000166747	AP1G1
ENSG00000213983.7	ENSG00000213983	AP1G2
ENSG00000072958.4	ENSG00000072958	AP1M1
ENSG00000182287.9	ENSG00000182287	AP1S2
ENSG00000006125.12	ENSG00000006125	AP2B1
ENSG00000161203.9	ENSG00000161203	AP2M1
ENSG00000042753.7	ENSG00000042753	AP2S1
ENSG00000132842.9	ENSG00000132842	AP3B1
ENSG00000065000.11	ENSG00000065000	AP3D1
ENSG00000185009.8	ENSG00000185009	AP3M1
ENSG00000070718.7	ENSG00000070718	AP3M2
ENSG00000177879.10	ENSG00000177879	AP3S1
ENSG00000134262.8	ENSG00000134262	AP4B1
ENSG00000053770.7	ENSG00000053770	AP5M1
ENSG00000125843.6	ENSG00000125843	AP5S1
ENSG00000034053.10	ENSG00000034053	APBA2
ENSG00000166313.14	ENSG00000166313	APBB1
ENSG00000163697.12	ENSG00000163697	APBB2
ENSG00000134982.12	ENSG00000134982	APC
ENSG00000164062.8	ENSG00000164062	APEH
ENSG00000100823.7	ENSG00000100823	APEX1
ENSG00000169188.4	ENSG00000169188	APEX2
ENSG00000117362.8	ENSG00000117362	APH1A
ENSG00000138613.9	ENSG00000138613	APH1B
ENSG00000166181.8	ENSG00000166181	API5
ENSG00000149089.8	ENSG00000149089	APIP
ENSG00000105290.7	ENSG00000105290	APLP1
ENSG00000084234.12	ENSG00000084234	APLP2
ENSG00000101474.7	ENSG00000101474	APMAP
ENSG00000124701.5	ENSG00000124701	APOBEC2
ENSG00000244509.3	ENSG00000244509	APOBEC3C
ENSG00000128335.9	ENSG00000128335	APOL2
ENSG00000184831.9	ENSG00000184831	APOO
ENSG00000256053.3	ENSG00000256053	APOPT1
ENSG00000142192.16	ENSG00000142192	APP
ENSG00000062725.5	ENSG00000062725	APPBP2
ENSG00000157500.6	ENSG00000157500	APPL1
ENSG00000136044.7	ENSG00000136044	APPL2
ENSG00000198931.6	ENSG00000198931	APRT
ENSG00000214293.4	ENSG00000214293	APTR
ENSG00000137074.14	ENSG00000137074	APTX
ENSG00000021776.6	ENSG00000021776	AQR
ENSG00000169083.11	ENSG00000169083	AR
ENSG00000078061.8	ENSG00000078061	ARAF
ENSG00000095139.9	ENSG00000095139	ARCN1
ENSG00000119682.12	ENSG00000119682	AREL1
ENSG00000143761.9	ENSG00000143761	ARF1
ENSG00000134287.5	ENSG00000134287	ARF3
ENSG00000168374.6	ENSG00000168374	ARF4
ENSG00000004059.6	ENSG00000004059	ARF5
ENSG00000165527.5	ENSG00000165527	ARF6
ENSG00000149182.10	ENSG00000149182	ARFGAP2
ENSG00000242247.6	ENSG00000242247	ARFGAP3
ENSG00000066777.4	ENSG00000066777	ARFGEF1
ENSG00000124198.8	ENSG00000124198	ARFGEF2
ENSG00000112379.8	ENSG00000112379	ARFGEF3
ENSG00000164144.10	ENSG00000164144	ARFIP1
ENSG00000081181.3	ENSG00000081181	ARG2
ENSG00000134884.9	ENSG00000134884	ARGLU1
ENSG00000175220.7	ENSG00000175220	ARHGAP1
ENSG00000198826.6	ENSG00000198826	ARHGAP11A
ENSG00000165322.13	ENSG00000165322	ARHGAP12
ENSG00000213390.6	ENSG00000213390	ARHGAP19
ENSG00000107863.12	ENSG00000107863	ARHGAP21
ENSG00000215769.4	ENSG00000215769	ARHGAP27P1-BPTFP1-KPNA2P3
ENSG00000088756.8	ENSG00000088756	ARHGAP28
ENSG00000134909.14	ENSG00000134909	ARHGAP32
ENSG00000160007.13	ENSG00000160007	ARHGAP35
ENSG00000100852.8	ENSG00000100852	ARHGAP5
ENSG00000104728.11	ENSG00000104728	ARHGEF10
ENSG00000074964.12	ENSG00000074964	ARHGEF10L
ENSG00000196914.4	ENSG00000196914	ARHGEF12
ENSG00000110237.3	ENSG00000110237	ARHGEF17
ENSG00000114790.8	ENSG00000114790	ARHGEF26
ENSG00000137135.13	ENSG00000137135	ARHGEF39
ENSG00000165801.5	ENSG00000165801	ARHGEF40
ENSG00000102606.13	ENSG00000102606	ARHGEF7
ENSG00000131089.9	ENSG00000131089	ARHGEF9
ENSG00000117713.13	ENSG00000117713	ARID1A
ENSG00000049618.17	ENSG00000049618	ARID1B
ENSG00000189079.11	ENSG00000189079	ARID2
ENSG00000116017.6	ENSG00000116017	ARID3A
ENSG00000032219.14	ENSG00000032219	ARID4A
ENSG00000054267.16	ENSG00000054267	ARID4B
ENSG00000150347.10	ENSG00000150347	ARID5B
ENSG00000166233.8	ENSG00000166233	ARIH1
ENSG00000177479.15	ENSG00000177479	ARIH2
ENSG00000120805.9	ENSG00000120805	ARL1
ENSG00000175414.6	ENSG00000175414	ARL10
ENSG00000169379.11	ENSG00000169379	ARL13B
ENSG00000152219.4	ENSG00000152219	ARL14EP
ENSG00000185305.6	ENSG00000185305	ARL15
ENSG00000214087.4	ENSG00000214087	ARL16
ENSG00000185829.11	ENSG00000185829	ARL17A
ENSG00000228696.4	ENSG00000228696	ARL17B
ENSG00000213465.3	ENSG00000213465	ARL2
ENSG00000102931.3	ENSG00000102931	ARL2BP
ENSG00000138175.8	ENSG00000138175	ARL3
ENSG00000122644.8	ENSG00000122644	ARL4A
ENSG00000248780.1	ENSG00000248780	ARL4AP2
ENSG00000218996.1	ENSG00000218996	ARL4AP5
ENSG00000188042.5	ENSG00000188042	ARL4C
ENSG00000162980.12	ENSG00000162980	ARL5A
ENSG00000165997.4	ENSG00000165997	ARL5B
ENSG00000113966.5	ENSG00000113966	ARL6
ENSG00000170540.10	ENSG00000170540	ARL6IP1
ENSG00000144746.6	ENSG00000144746	ARL6IP5
ENSG00000177917.6	ENSG00000177917	ARL6IP6
ENSG00000134108.8	ENSG00000134108	ARL8B
ENSG00000104442.5	ENSG00000104442	ARMC1
ENSG00000118690.8	ENSG00000118690	ARMC2
ENSG00000169126.11	ENSG00000169126	ARMC4
ENSG00000105676.9	ENSG00000105676	ARMC6
ENSG00000114098.13	ENSG00000114098	ARMC8
ENSG00000184867.9	ENSG00000184867	ARMCX2
ENSG00000102401.15	ENSG00000102401	ARMCX3
ENSG00000196440.7	ENSG00000196440	ARMCX4
ENSG00000125962.10	ENSG00000125962	ARMCX5
ENSG00000271147.3	ENSG00000271147	ARMCX5-GPRASP2
ENSG00000198960.6	ENSG00000198960	ARMCX6
ENSG00000204072.3	ENSG00000204072	ARMCX7P
ENSG00000146476.6	ENSG00000146476	ARMT1
ENSG00000143437.16	ENSG00000143437	ARNT
ENSG00000172379.14	ENSG00000172379	ARNT2
ENSG00000241685.4	ENSG00000241685	ARPC1A
ENSG00000130429.8	ENSG00000130429	ARPC1B
ENSG00000163466.11	ENSG00000163466	ARPC2
ENSG00000111229.11	ENSG00000111229	ARPC3
ENSG00000241553.8	ENSG00000241553	ARPC4
ENSG00000162704.11	ENSG00000162704	ARPC5
ENSG00000136950.9	ENSG00000136950	ARPC5L
ENSG00000128989.6	ENSG00000128989	ARPP19
ENSG00000113369.4	ENSG00000113369	ARRDC3
ENSG00000140450.7	ENSG00000140450	ARRDC4
ENSG00000113273.11	ENSG00000113273	ARSB
ENSG00000006756.11	ENSG00000006756	ARSD
ENSG00000141337.8	ENSG00000141337	ARSG
ENSG00000173409.9	ENSG00000173409	ARV1
ENSG00000104763.13	ENSG00000104763	ASAH1
ENSG00000188611.10	ENSG00000188611	ASAH2
ENSG00000204147.5	ENSG00000204147	ASAH2B
ENSG00000153317.10	ENSG00000153317	ASAP1
ENSG00000088280.14	ENSG00000088280	ASAP3
ENSG00000065802.7	ENSG00000065802	ASB1
ENSG00000196372.8	ENSG00000196372	ASB13
ENSG00000267080.1	ENSG00000267080	ASB16-AS1
ENSG00000182177.9	ENSG00000182177	ASB18
ENSG00000115239.17	ENSG00000115239	ASB3
ENSG00000177981.6	ENSG00000177981	ASB8
ENSG00000138303.13	ENSG00000138303	ASCC1
ENSG00000100325.10	ENSG00000100325	ASCC2
ENSG00000112249.9	ENSG00000112249	ASCC3
ENSG00000139352.3	ENSG00000139352	ASCL1
ENSG00000111875.7	ENSG00000111875	ASF1A
ENSG00000105011.4	ENSG00000105011	ASF1B
ENSG00000116539.6	ENSG00000116539	ASH1L
ENSG00000129691.11	ENSG00000129691	ASH2L
ENSG00000126522.12	ENSG00000126522	ASL
ENSG00000169093.10	ENSG00000169093	ASMTL
ENSG00000198356.7	ENSG00000198356	ASNA1
ENSG00000070669.12	ENSG00000070669	ASNS
ENSG00000138381.5	ENSG00000138381	ASNSD1
ENSG00000198363.11	ENSG00000198363	ASPH
ENSG00000128203.6	ENSG00000128203	ASPHD2
ENSG00000066279.12	ENSG00000066279	ASPM
ENSG00000162174.8	ENSG00000162174	ASRGL1
ENSG00000130707.13	ENSG00000130707	ASS1
ENSG00000034533.7	ENSG00000034533	ASTE1
ENSG00000152092.11	ENSG00000152092	ASTN1
ENSG00000148219.12	ENSG00000148219	ASTN2
ENSG00000171456.12	ENSG00000171456	ASXL1
ENSG00000143970.12	ENSG00000143970	ASXL2
ENSG00000141431.5	ENSG00000141431	ASXL3
ENSG00000138138.9	ENSG00000138138	ATAD1
ENSG00000156802.8	ENSG00000156802	ATAD2
ENSG00000119778.10	ENSG00000119778	ATAD2B
ENSG00000176208.4	ENSG00000176208	ATAD5
ENSG00000137343.13	ENSG00000137343	ATAT1
ENSG00000107669.13	ENSG00000107669	ATE1
ENSG00000123268.4	ENSG00000123268	ATF1
ENSG00000115966.12	ENSG00000115966	ATF2
ENSG00000128272.10	ENSG00000128272	ATF4
ENSG00000118217.5	ENSG00000118217	ATF6
ENSG00000213676.6	ENSG00000213676	ATF6B
ENSG00000170653.14	ENSG00000170653	ATF7
ENSG00000171681.8	ENSG00000171681	ATF7IP
ENSG00000166669.9	ENSG00000166669	ATF7IP2
ENSG00000145782.8	ENSG00000145782	ATG12
ENSG00000175224.12	ENSG00000175224	ATG13
ENSG00000126775.8	ENSG00000126775	ATG14
ENSG00000085978.17	ENSG00000085978	ATG16L1
ENSG00000066739.7	ENSG00000066739	ATG2B
ENSG00000144848.6	ENSG00000144848	ATG3
ENSG00000125703.10	ENSG00000125703	ATG4C
ENSG00000057663.8	ENSG00000057663	ATG5
ENSG00000197548.8	ENSG00000197548	ATG7
ENSG00000181652.14	ENSG00000181652	ATG9B
ENSG00000138363.10	ENSG00000138363	ATIC
ENSG00000198513.7	ENSG00000198513	ATL1
ENSG00000119787.9	ENSG00000119787	ATL2
ENSG00000184743.8	ENSG00000184743	ATL3
ENSG00000149311.13	ENSG00000149311	ATM
ENSG00000166454.5	ENSG00000166454	ATMIN
ENSG00000177556.7	ENSG00000177556	ATOX1
ENSG00000145246.9	ENSG00000145246	ATP10D
ENSG00000058063.11	ENSG00000058063	ATP11B
ENSG00000101974.10	ENSG00000101974	ATP11C
ENSG00000105726.12	ENSG00000105726	ATP13A1
ENSG00000133657.10	ENSG00000133657	ATP13A3
ENSG00000018625.10	ENSG00000018625	ATP1A2
ENSG00000143153.8	ENSG00000143153	ATP1B1
ENSG00000129244.4	ENSG00000129244	ATP1B2
ENSG00000069849.6	ENSG00000069849	ATP1B3
ENSG00000174437.12	ENSG00000174437	ATP2A2
ENSG00000070961.10	ENSG00000070961	ATP2B1
ENSG00000058668.10	ENSG00000058668	ATP2B4
ENSG00000017260.15	ENSG00000017260	ATP2C1
ENSG00000064270.8	ENSG00000064270	ATP2C2
ENSG00000152234.11	ENSG00000152234	ATP5A1
ENSG00000110955.4	ENSG00000110955	ATP5B
ENSG00000165629.15	ENSG00000165629	ATP5C1
ENSG00000124172.5	ENSG00000124172	ATP5E
ENSG00000116459.6	ENSG00000116459	ATP5F1
ENSG00000159199.9	ENSG00000159199	ATP5G1
ENSG00000135390.13	ENSG00000135390	ATP5G2
ENSG00000154518.5	ENSG00000154518	ATP5G3
ENSG00000167863.7	ENSG00000167863	ATP5H
ENSG00000154723.8	ENSG00000154723	ATP5J
ENSG00000241468.3	ENSG00000241468	ATP5J2
ENSG00000167283.3	ENSG00000167283	ATP5L
ENSG00000241837.2	ENSG00000241837	ATP5O
ENSG00000125375.10	ENSG00000125375	ATP5S
ENSG00000182220.9	ENSG00000182220	ATP6AP2
ENSG00000033627.10	ENSG00000033627	ATP6V0A1
ENSG00000185344.9	ENSG00000185344	ATP6V0A2
ENSG00000117410.9	ENSG00000117410	ATP6V0B
ENSG00000159720.7	ENSG00000159720	ATP6V0D1
ENSG00000113732.4	ENSG00000113732	ATP6V0E1
ENSG00000171130.13	ENSG00000171130	ATP6V0E2
ENSG00000114573.5	ENSG00000114573	ATP6V1A
ENSG00000147416.6	ENSG00000147416	ATP6V1B2
ENSG00000155097.7	ENSG00000155097	ATP6V1C1
ENSG00000143882.5	ENSG00000143882	ATP6V1C2
ENSG00000100554.7	ENSG00000100554	ATP6V1D
ENSG00000131100.8	ENSG00000131100	ATP6V1E1
ENSG00000128524.4	ENSG00000128524	ATP6V1F
ENSG00000136888.6	ENSG00000136888	ATP6V1G1
ENSG00000213760.6	ENSG00000213760	ATP6V1G2
ENSG00000047249.12	ENSG00000047249	ATP6V1H
ENSG00000165240.13	ENSG00000165240	ATP7A
ENSG00000124406.12	ENSG00000124406	ATP8A1
ENSG00000179766.13	ENSG00000179766	ATP8B5P
ENSG00000054793.9	ENSG00000054793	ATP9A
ENSG00000166377.15	ENSG00000166377	ATP9B
ENSG00000123472.8	ENSG00000123472	ATPAF1
ENSG00000171953.11	ENSG00000171953	ATPAF2
ENSG00000130770.13	ENSG00000130770	ATPIF1
ENSG00000175054.10	ENSG00000175054	ATR
ENSG00000138085.12	ENSG00000138085	ATRAID
ENSG00000164053.13	ENSG00000164053	ATRIP
ENSG00000088812.13	ENSG00000088812	ATRN
ENSG00000085224.16	ENSG00000085224	ATRX
ENSG00000130638.11	ENSG00000130638	ATXN10
ENSG00000224470.3	ENSG00000224470	ATXN1L
ENSG00000204842.10	ENSG00000204842	ATXN2
ENSG00000066427.17	ENSG00000066427	ATXN3
ENSG00000146776.10	ENSG00000146776	ATXN7L1
ENSG00000162650.11	ENSG00000162650	ATXN7L2
ENSG00000253719.2	ENSG00000253719	ATXN7L3B
ENSG00000127423.6	ENSG00000127423	AUNIP
ENSG00000115307.12	ENSG00000115307	AUP1
ENSG00000087586.13	ENSG00000087586	AURKA
ENSG00000175756.9	ENSG00000175756	AURKAIP1
ENSG00000178999.8	ENSG00000178999	AURKB
ENSG00000158321.11	ENSG00000158321	AUTS2
ENSG00000105778.13	ENSG00000105778	AVL9
ENSG00000168646.8	ENSG00000168646	AXIN2
ENSG00000167601.7	ENSG00000167601	AXL
ENSG00000163512.9	ENSG00000163512	AZI2
ENSG00000155096.9	ENSG00000155096	AZIN1
ENSG00000166710.13	ENSG00000166710	B2M
ENSG00000172318.4	ENSG00000172318	B3GALT1
ENSG00000112309.6	ENSG00000112309	B3GAT2
ENSG00000149541.5	ENSG00000149541	B3GAT3
ENSG00000187676.7	ENSG00000187676	B3GLCT
ENSG00000176597.7	ENSG00000176597	B3GNT5
ENSG00000135454.9	ENSG00000135454	B4GALNT1
ENSG00000086062.8	ENSG00000086062	B4GALT1
ENSG00000117411.12	ENSG00000117411	B4GALT2
ENSG00000158850.10	ENSG00000158850	B4GALT3
ENSG00000121578.8	ENSG00000121578	B4GALT4
ENSG00000158470.5	ENSG00000158470	B4GALT5
ENSG00000118276.7	ENSG00000118276	B4GALT6
ENSG00000174684.6	ENSG00000174684	B4GAT1
ENSG00000108641.10	ENSG00000108641	B9D1
ENSG00000123810.3	ENSG00000123810	B9D2
ENSG00000164929.12	ENSG00000164929	BAALC
ENSG00000158019.16	ENSG00000158019	BABAM2
ENSG00000186318.12	ENSG00000186318	BACE1
ENSG00000156273.11	ENSG00000156273	BACH1
ENSG00000112182.10	ENSG00000112182	BACH2
ENSG00000002330.9	ENSG00000002330	BAD
ENSG00000112208.10	ENSG00000112208	BAG2
ENSG00000151929.5	ENSG00000151929	BAG3
ENSG00000156735.6	ENSG00000156735	BAG4
ENSG00000166170.9	ENSG00000166170	BAG5
ENSG00000226137.3	ENSG00000226137	BAIAP2-AS1
ENSG00000175334.3	ENSG00000175334	BANF1
ENSG00000138376.6	ENSG00000138376	BARD1
ENSG00000176788.7	ENSG00000176788	BASP1
ENSG00000198604.6	ENSG00000198604	BAZ1A
ENSG00000009954.6	ENSG00000009954	BAZ1B
ENSG00000076108.7	ENSG00000076108	BAZ2A
ENSG00000123636.13	ENSG00000123636	BAZ2B
ENSG00000214413.3	ENSG00000214413	BBIP1
ENSG00000179941.6	ENSG00000179941	BBS10
ENSG00000181004.5	ENSG00000181004	BBS12
ENSG00000125124.7	ENSG00000125124	BBS2
ENSG00000140463.9	ENSG00000140463	BBS4
ENSG00000138686.5	ENSG00000138686	BBS7
ENSG00000122507.16	ENSG00000122507	BBS9
ENSG00000114439.14	ENSG00000114439	BBX
ENSG00000075790.6	ENSG00000075790	BCAP29
ENSG00000185825.11	ENSG00000185825	BCAP31
ENSG00000137936.12	ENSG00000137936	BCAR3
ENSG00000116752.5	ENSG00000116752	BCAS2
ENSG00000060982.10	ENSG00000060982	BCAT1
ENSG00000105552.10	ENSG00000105552	BCAT2
ENSG00000107949.12	ENSG00000107949	BCCIP
ENSG00000186666.4	ENSG00000186666	BCDIN3D
ENSG00000114200.5	ENSG00000114200	BCHE
ENSG00000083123.10	ENSG00000083123	BCKDHB
ENSG00000103507.9	ENSG00000103507	BCKDK
ENSG00000142867.8	ENSG00000142867	BCL10
ENSG00000119866.16	ENSG00000119866	BCL11A
ENSG00000171791.10	ENSG00000171791	BCL2
ENSG00000171552.8	ENSG00000171552	BCL2L1
ENSG00000153094.17	ENSG00000153094	BCL2L11
ENSG00000099968.13	ENSG00000099968	BCL2L13
ENSG00000106635.3	ENSG00000106635	BCL7B
ENSG00000099385.7	ENSG00000099385	BCL7C
ENSG00000116128.5	ENSG00000116128	BCL9
ENSG00000029363.11	ENSG00000029363	BCLAF1
ENSG00000183337.12	ENSG00000183337	BCOR
ENSG00000186716.15	ENSG00000186716	BCR
ENSG00000074582.8	ENSG00000074582	BCS1L
ENSG00000164039.10	ENSG00000164039	BDH2
ENSG00000145734.14	ENSG00000145734	BDP1
ENSG00000126581.8	ENSG00000126581	BECN1
ENSG00000178409.9	ENSG00000178409	BEND3
ENSG00000105829.7	ENSG00000105829	BET1
ENSG00000177951.13	ENSG00000177951	BET1L
ENSG00000133169.5	ENSG00000133169	BEX1
ENSG00000133134.7	ENSG00000133134	BEX2
ENSG00000166681.9	ENSG00000166681	BEX3
ENSG00000102409.9	ENSG00000102409	BEX4
ENSG00000103429.6	ENSG00000103429	BFAR
ENSG00000198908.7	ENSG00000198908	BHLHB9
ENSG00000122870.7	ENSG00000122870	BICC1
ENSG00000151746.9	ENSG00000151746	BICD1
ENSG00000185963.9	ENSG00000185963	BICD2
ENSG00000015475.14	ENSG00000015475	BID
ENSG00000147439.7	ENSG00000147439	BIN3
ENSG00000110330.4	ENSG00000110330	BIRC2
ENSG00000089685.10	ENSG00000089685	BIRC5
ENSG00000115760.9	ENSG00000115760	BIRC6
ENSG00000134897.9	ENSG00000134897	BIVM
ENSG00000166619.8	ENSG00000166619	BLCAP
ENSG00000197299.6	ENSG00000197299	BLM
ENSG00000108578.10	ENSG00000108578	BLMH
ENSG00000135441.3	ENSG00000135441	BLOC1S1
ENSG00000196072.7	ENSG00000196072	BLOC1S2
ENSG00000189114.6	ENSG00000189114	BLOC1S3
ENSG00000188428.12	ENSG00000188428	BLOC1S5
ENSG00000104164.6	ENSG00000104164	BLOC1S6
ENSG00000106605.6	ENSG00000106605	BLVRA
ENSG00000117475.9	ENSG00000117475	BLZF1
ENSG00000168283.9	ENSG00000168283	BMI1
ENSG00000125845.6	ENSG00000125845	BMP2
ENSG00000138756.13	ENSG00000138756	BMP2K
ENSG00000101144.8	ENSG00000101144	BMP7
ENSG00000107779.7	ENSG00000107779	BMPR1A
ENSG00000138696.6	ENSG00000138696	BMPR1B
ENSG00000204217.8	ENSG00000204217	BMPR2
ENSG00000165733.7	ENSG00000165733	BMS1
ENSG00000164603.7	ENSG00000164603	BMT2
ENSG00000113734.13	ENSG00000113734	BNIP1
ENSG00000140299.7	ENSG00000140299	BNIP2
ENSG00000176171.7	ENSG00000176171	BNIP3
ENSG00000271524.1	ENSG00000271524	BNIP3P17
ENSG00000144857.10	ENSG00000144857	BOC
ENSG00000145919.6	ENSG00000145919	BOD1
ENSG00000038219.8	ENSG00000038219	BOD1L1
ENSG00000169627.7	ENSG00000169627	BOLA2B
ENSG00000163170.7	ENSG00000163170	BOLA3
ENSG00000225439.2	ENSG00000225439	BOLA3-AS1
ENSG00000136122.11	ENSG00000136122	BORA
ENSG00000166275.11	ENSG00000166275	BORCS7
ENSG00000172331.7	ENSG00000172331	BPGM
ENSG00000137274.8	ENSG00000137274	BPHL
ENSG00000162813.13	ENSG00000162813	BPNT1
ENSG00000171634.12	ENSG00000171634	BPTF
ENSG00000157764.8	ENSG00000157764	BRAF
ENSG00000012048.15	ENSG00000012048	BRCA1
ENSG00000139618.10	ENSG00000139618	BRCA2
ENSG00000185515.10	ENSG00000185515	BRCC3
ENSG00000204256.8	ENSG00000204256	BRD2
ENSG00000169925.12	ENSG00000169925	BRD3
ENSG00000141867.13	ENSG00000141867	BRD4
ENSG00000166164.11	ENSG00000166164	BRD7
ENSG00000112983.13	ENSG00000112983	BRD8
ENSG00000028310.13	ENSG00000028310	BRD9
ENSG00000136492.4	ENSG00000136492	BRIP1
ENSG00000113460.8	ENSG00000113460	BRIX1
ENSG00000254999.2	ENSG00000254999	BRK1
ENSG00000174744.9	ENSG00000174744	BRMS1
ENSG00000100916.9	ENSG00000100916	BRMS1L
ENSG00000162819.7	ENSG00000162819	BROX
ENSG00000096070.15	ENSG00000096070	BRPF3
ENSG00000185658.9	ENSG00000185658	BRWD1
ENSG00000165288.10	ENSG00000165288	BRWD3
ENSG00000168000.10	ENSG00000168000	BSCL2
ENSG00000160058.14	ENSG00000160058	BSDC1
ENSG00000172270.14	ENSG00000172270	BSG
ENSG00000164061.4	ENSG00000164061	BSN
ENSG00000095564.9	ENSG00000095564	BTAF1
ENSG00000148925.6	ENSG00000148925	BTBD10
ENSG00000132640.10	ENSG00000132640	BTBD3
ENSG00000184887.9	ENSG00000184887	BTBD6
ENSG00000011114.10	ENSG00000011114	BTBD7
ENSG00000145741.11	ENSG00000145741	BTF3
ENSG00000134717.13	ENSG00000134717	BTF3L4
ENSG00000213189.4	ENSG00000213189	BTF3L4P2
ENSG00000133639.3	ENSG00000133639	BTG1
ENSG00000159388.5	ENSG00000159388	BTG2
ENSG00000154640.10	ENSG00000154640	BTG3
ENSG00000112763.11	ENSG00000112763	BTN2A1
ENSG00000124508.12	ENSG00000124508	BTN2A2
ENSG00000166167.13	ENSG00000166167	BTRC
ENSG00000169679.10	ENSG00000169679	BUB1
ENSG00000156970.8	ENSG00000156970	BUB1B
ENSG00000154473.13	ENSG00000154473	BUB3
ENSG00000137656.7	ENSG00000137656	BUD13
ENSG00000071462.7	ENSG00000071462	BUD23
ENSG00000106245.5	ENSG00000106245	BUD31
ENSG00000112578.5	ENSG00000112578	BYSL
ENSG00000082153.13	ENSG00000082153	BZW1
ENSG00000198406.6	ENSG00000198406	BZW1P2
ENSG00000136261.10	ENSG00000136261	BZW2
ENSG00000120029.8	ENSG00000120029	C10orf76
ENSG00000119965.8	ENSG00000119965	C10orf88
ENSG00000137720.3	ENSG00000137720	C11orf1
ENSG00000171067.6	ENSG00000171067	C11orf24
ENSG00000149179.9	ENSG00000149179	C11orf49
ENSG00000182919.10	ENSG00000182919	C11orf54
ENSG00000150776.13	ENSG00000150776	C11orf57
ENSG00000110696.5	ENSG00000110696	C11orf58
ENSG00000175573.6	ENSG00000175573	C11orf68
ENSG00000137691.8	ENSG00000137691	C11orf70
ENSG00000184224.3	ENSG00000184224	C11orf72
ENSG00000166352.11	ENSG00000166352	C11orf74
ENSG00000188070.8	ENSG00000188070	C11orf95
ENSG00000139637.9	ENSG00000139637	C12orf10
ENSG00000133641.13	ENSG00000133641	C12orf29
ENSG00000157895.7	ENSG00000157895	C12orf43
ENSG00000151131.5	ENSG00000151131	C12orf45
ENSG00000165805.5	ENSG00000165805	C12orf50
ENSG00000111678.6	ENSG00000111678	C12orf57
ENSG00000182993.3	ENSG00000182993	C12orf60
ENSG00000130921.3	ENSG00000130921	C12orf65
ENSG00000204954.5	ENSG00000204954	C12orf73
ENSG00000179933.4	ENSG00000179933	C14orf119
ENSG00000227051.4	ENSG00000227051	C14orf132
ENSG00000087302.4	ENSG00000087302	C14orf166
ENSG00000156411.5	ENSG00000156411	C14orf2
ENSG00000179476.3	ENSG00000179476	C14orf28
ENSG00000139971.11	ENSG00000139971	C14orf37
ENSG00000169609.9	ENSG00000169609	C15orf40
ENSG00000186073.7	ENSG00000186073	C15orf41
ENSG00000166780.6	ENSG00000166780	C16orf45
ENSG00000185716.7	ENSG00000185716	C16orf52
ENSG00000103544.10	ENSG00000103544	C16orf62
ENSG00000125149.7	ENSG00000125149	C16orf70
ENSG00000182831.7	ENSG00000182831	C16orf72
ENSG00000155330.5	ENSG00000155330	C16orf87
ENSG00000258315.1	ENSG00000258315	C17orf49
ENSG00000125319.10	ENSG00000125319	C17orf53
ENSG00000186665.8	ENSG00000186665	C17orf58
ENSG00000178927.12	ENSG00000178927	C17orf62
ENSG00000108666.5	ENSG00000108666	C17orf75
ENSG00000141219.11	ENSG00000141219	C17orf80
ENSG00000141428.12	ENSG00000141428	C18orf21
ENSG00000152242.6	ENSG00000152242	C18orf25
ENSG00000166845.9	ENSG00000166845	C18orf54
ENSG00000131943.13	ENSG00000131943	C19orf12
ENSG00000167747.9	ENSG00000167747	C19orf48
ENSG00000104979.4	ENSG00000104979	C19orf53
ENSG00000197223.7	ENSG00000197223	C1D
ENSG00000106392.6	ENSG00000106392	C1GALT1
ENSG00000171155.7	ENSG00000171155	C1GALT1C1
ENSG00000257818.1	ENSG00000257818	C1GALT1P1
ENSG00000116922.10	ENSG00000116922	C1orf109
ENSG00000000460.12	ENSG00000000460	C1orf112
ENSG00000162384.9	ENSG00000162384	C1orf123
ENSG00000143633.8	ENSG00000143633	C1orf131
ENSG00000198912.6	ENSG00000198912	C1orf174
ENSG00000119280.12	ENSG00000119280	C1orf198
ENSG00000116667.8	ENSG00000116667	C1orf21
ENSG00000239887.3	ENSG00000239887	C1orf226
ENSG00000157181.10	ENSG00000157181	C1orf27
ENSG00000143793.8	ENSG00000143793	C1orf35
ENSG00000143612.14	ENSG00000143612	C1orf43
ENSG00000164008.9	ENSG00000164008	C1orf50
ENSG00000162642.9	ENSG00000162642	C1orf52
ENSG00000143443.9	ENSG00000143443	C1orf56
ENSG00000125462.12	ENSG00000125462	C1orf61
ENSG00000162757.3	ENSG00000162757	C1orf74
ENSG00000108561.4	ENSG00000108561	C1QBP
ENSG00000082196.16	ENSG00000082196	C1QTNF3
ENSG00000088854.11	ENSG00000088854	C20orf194
ENSG00000171984.10	ENSG00000171984	C20orf196
ENSG00000160221.12	ENSG00000160221	C21orf33
ENSG00000160298.13	ENSG00000160298	C21orf58
ENSG00000159079.14	ENSG00000159079	C21orf59
ENSG00000154642.6	ENSG00000154642	C21orf91
ENSG00000242259.4	ENSG00000242259	C22orf39
ENSG00000184208.10	ENSG00000184208	C22orf46
ENSG00000157617.12	ENSG00000157617	C2CD2
ENSG00000168014.12	ENSG00000168014	C2CD3
ENSG00000111731.8	ENSG00000111731	C2CD5
ENSG00000115998.3	ENSG00000115998	C2orf42
ENSG00000168887.6	ENSG00000168887	C2orf68
ENSG00000178074.5	ENSG00000178074	C2orf69
ENSG00000188674.6	ENSG00000188674	C2orf80
ENSG00000187699.6	ENSG00000187699	C2orf88
ENSG00000114405.6	ENSG00000114405	C3orf14
ENSG00000179021.5	ENSG00000179021	C3orf38
ENSG00000114529.8	ENSG00000114529	C3orf52
ENSG00000181744.4	ENSG00000181744	C3orf58
ENSG00000188315.3	ENSG00000188315	C3orf62
ENSG00000187068.2	ENSG00000187068	C3orf70
ENSG00000164096.10	ENSG00000164096	C4orf3
ENSG00000151470.8	ENSG00000151470	C4orf33
ENSG00000163633.6	ENSG00000163633	C4orf36
ENSG00000205208.4	ENSG00000205208	C4orf46
ENSG00000113583.6	ENSG00000113583	C5orf15
ENSG00000082213.13	ENSG00000082213	C5orf22
ENSG00000181904.8	ENSG00000181904	C5orf24
ENSG00000172244.4	ENSG00000172244	C5orf34
ENSG00000197603.9	ENSG00000197603	C5orf42
ENSG00000205765.4	ENSG00000205765	C5orf51
ENSG00000196821.5	ENSG00000196821	C6orf106
ENSG00000112539.10	ENSG00000112539	C6orf118
ENSG00000185127.5	ENSG00000185127	C6orf120
ENSG00000203872.6	ENSG00000203872	C6orf163
ENSG00000185689.11	ENSG00000185689	C6orf201
ENSG00000130349.5	ENSG00000130349	C6orf203
ENSG00000204387.8	ENSG00000204387	C6orf48
ENSG00000112308.8	ENSG00000112308	C6orf62
ENSG00000198663.12	ENSG00000198663	C6orf89
ENSG00000122783.12	ENSG00000122783	C7orf49
ENSG00000243317.3	ENSG00000243317	C7orf73
ENSG00000182307.8	ENSG00000182307	C8orf33
ENSG00000164743.4	ENSG00000164743	C8orf48
ENSG00000241852.5	ENSG00000241852	C8orf58
ENSG00000148120.10	ENSG00000148120	C9orf3
ENSG00000135045.6	ENSG00000135045	C9orf40
ENSG00000147894.10	ENSG00000147894	C9orf72
ENSG00000136819.10	ENSG00000136819	C9orf78
ENSG00000155621.10	ENSG00000155621	C9orf85
ENSG00000118298.6	ENSG00000118298	CA14
ENSG00000104267.5	ENSG00000104267	CA2
ENSG00000167434.5	ENSG00000167434	CA4
ENSG00000169239.8	ENSG00000169239	CA5B
ENSG00000135932.6	ENSG00000135932	CAB39
ENSG00000102547.14	ENSG00000102547	CAB39L
ENSG00000099991.12	ENSG00000099991	CABIN1
ENSG00000149679.7	ENSG00000149679	CABLES2
ENSG00000154040.16	ENSG00000154040	CABYR
ENSG00000160325.10	ENSG00000160325	CACFD1
ENSG00000158966.9	ENSG00000158966	CACHD1
ENSG00000165995.14	ENSG00000165995	CACNB2
ENSG00000182389.14	ENSG00000182389	CACNB4
ENSG00000075461.5	ENSG00000075461	CACNG4
ENSG00000151893.10	ENSG00000151893	CACUL1
ENSG00000116161.13	ENSG00000116161	CACYBP
ENSG00000084774.9	ENSG00000084774	CAD
ENSG00000182985.12	ENSG00000182985	CADM1
ENSG00000163618.13	ENSG00000163618	CADPS
ENSG00000081803.11	ENSG00000081803	CADPS2
ENSG00000012822.11	ENSG00000012822	CALCOCO1
ENSG00000136436.10	ENSG00000136436	CALCOCO2
ENSG00000122786.15	ENSG00000122786	CALD1
ENSG00000198668.6	ENSG00000198668	CALM1
ENSG00000143933.12	ENSG00000143933	CALM2
ENSG00000160014.12	ENSG00000160014	CALM3
ENSG00000179218.9	ENSG00000179218	CALR
ENSG00000128595.12	ENSG00000128595	CALU
ENSG00000145349.12	ENSG00000145349	CAMK2D
ENSG00000162545.5	ENSG00000162545	CAMK2N1
ENSG00000152495.6	ENSG00000152495	CAMK4
ENSG00000110931.14	ENSG00000110931	CAMKK2
ENSG00000164076.12	ENSG00000164076	CAMKV
ENSG00000164615.3	ENSG00000164615	CAMLG
ENSG00000130559.14	ENSG00000130559	CAMSAP1
ENSG00000118200.10	ENSG00000118200	CAMSAP2
ENSG00000171735.14	ENSG00000171735	CAMTA1
ENSG00000111530.8	ENSG00000111530	CAND1
ENSG00000144712.7	ENSG00000144712	CAND2
ENSG00000171302.12	ENSG00000171302	CANT1
ENSG00000127022.10	ENSG00000127022	CANX
ENSG00000131236.12	ENSG00000131236	CAP1
ENSG00000112186.7	ENSG00000112186	CAP2
ENSG00000162909.13	ENSG00000162909	CAPN2
ENSG00000149260.10	ENSG00000149260	CAPN5
ENSG00000131375.5	ENSG00000131375	CAPN7
ENSG00000126247.6	ENSG00000126247	CAPNS1
ENSG00000135387.15	ENSG00000135387	CAPRIN1
ENSG00000110888.13	ENSG00000110888	CAPRIN2
ENSG00000116489.8	ENSG00000116489	CAPZA1
ENSG00000198898.8	ENSG00000198898	CAPZA2
ENSG00000077549.13	ENSG00000077549	CAPZB
ENSG00000105483.12	ENSG00000105483	CARD8
ENSG00000138380.13	ENSG00000138380	CARF
ENSG00000079691.15	ENSG00000079691	CARMIL1
ENSG00000156017.8	ENSG00000156017	CARNMT1
ENSG00000110619.12	ENSG00000110619	CARS
ENSG00000204682.5	ENSG00000204682	CASC10
ENSG00000272168.1	ENSG00000272168	CASC15
ENSG00000108349.10	ENSG00000108349	CASC3
ENSG00000166734.14	ENSG00000166734	CASC4
ENSG00000249395.2	ENSG00000249395	CASC9
ENSG00000127995.12	ENSG00000127995	CASD1
ENSG00000147044.16	ENSG00000147044	CASK
ENSG00000106144.15	ENSG00000106144	CASP2
ENSG00000164305.13	ENSG00000164305	CASP3
ENSG00000138794.5	ENSG00000138794	CASP6
ENSG00000165806.15	ENSG00000165806	CASP7
ENSG00000118412.8	ENSG00000118412	CASP8AP2
ENSG00000132906.13	ENSG00000132906	CASP9
ENSG00000153113.19	ENSG00000153113	CAST
ENSG00000170681.6	ENSG00000170681	CAVIN4
ENSG00000067955.9	ENSG00000067955	CBFB
ENSG00000110395.4	ENSG00000110395	CBL
ENSG00000114423.14	ENSG00000114423	CBLB
ENSG00000105879.7	ENSG00000105879	CBLL1
ENSG00000145439.7	ENSG00000145439	CBR4
ENSG00000160200.13	ENSG00000160200	CBS
ENSG00000172785.14	ENSG00000172785	CBWD1
ENSG00000136682.10	ENSG00000136682	CBWD2
ENSG00000196873.11	ENSG00000196873	CBWD3
ENSG00000147996.12	ENSG00000147996	CBWD5
ENSG00000215126.6	ENSG00000215126	CBWD6
ENSG00000108468.10	ENSG00000108468	CBX1
ENSG00000173894.6	ENSG00000173894	CBX2
ENSG00000122565.14	ENSG00000122565	CBX3
ENSG00000094916.9	ENSG00000094916	CBX5
ENSG00000183741.7	ENSG00000183741	CBX6
ENSG00000100211.6	ENSG00000100211	CBY1
ENSG00000048342.11	ENSG00000048342	CC2D2A
ENSG00000060339.9	ENSG00000060339	CCAR1
ENSG00000150636.11	ENSG00000150636	CCDC102B
ENSG00000164221.8	ENSG00000164221	CCDC112
ENSG00000103021.5	ENSG00000103021	CCDC113
ENSG00000136710.5	ENSG00000136710	CCDC115
ENSG00000159873.5	ENSG00000159873	CCDC117
ENSG00000160799.7	ENSG00000160799	CCDC12
ENSG00000151773.8	ENSG00000151773	CCDC122
ENSG00000007080.6	ENSG00000007080	CCDC124
ENSG00000169193.7	ENSG00000169193	CCDC126
ENSG00000164366.3	ENSG00000164366	CCDC127
ENSG00000128596.12	ENSG00000128596	CCDC136
ENSG00000185298.8	ENSG00000185298	CCDC137
ENSG00000163006.7	ENSG00000163006	CCDC138
ENSG00000175455.10	ENSG00000175455	CCDC14
ENSG00000154898.11	ENSG00000154898	CCDC144CP
ENSG00000233098.4	ENSG00000233098	CCDC144NL-AS1
ENSG00000149548.10	ENSG00000149548	CCDC15
ENSG00000144395.13	ENSG00000144395	CCDC150
ENSG00000203952.5	ENSG00000203952	CCDC160
ENSG00000198937.8	ENSG00000198937	CCDC167
ENSG00000164989.11	ENSG00000164989	CCDC171
ENSG00000154479.8	ENSG00000154479	CCDC173
ENSG00000154781.11	ENSG00000154781	CCDC174
ENSG00000122483.13	ENSG00000122483	CCDC18
ENSG00000197816.9	ENSG00000197816	CCDC180
ENSG00000117477.8	ENSG00000117477	CCDC181
ENSG00000177875.3	ENSG00000177875	CCDC184
ENSG00000165813.12	ENSG00000165813	CCDC186
ENSG00000223745.3	ENSG00000223745	CCDC18-AS1
ENSG00000163617.6	ENSG00000163617	CCDC191
ENSG00000147419.12	ENSG00000147419	CCDC25
ENSG00000024862.12	ENSG00000024862	CCDC28A
ENSG00000160050.10	ENSG00000160050	CCDC28B
ENSG00000128891.11	ENSG00000128891	CCDC32
ENSG00000109881.12	ENSG00000109881	CCDC34
ENSG00000141519.10	ENSG00000141519	CCDC40
ENSG00000180329.9	ENSG00000180329	CCDC43
ENSG00000108588.9	ENSG00000108588	CCDC47
ENSG00000152492.9	ENSG00000152492	CCDC50
ENSG00000164051.9	ENSG00000164051	CCDC51
ENSG00000160124.5	ENSG00000160124	CCDC58
ENSG00000133773.7	ENSG00000133773	CCDC59
ENSG00000108091.10	ENSG00000108091	CCDC6
ENSG00000180376.12	ENSG00000180376	CCDC66
ENSG00000216937.7	ENSG00000216937	CCDC7
ENSG00000120647.5	ENSG00000120647	CCDC77
ENSG00000091986.11	ENSG00000091986	CCDC80
ENSG00000149231.7	ENSG00000149231	CCDC82
ENSG00000205476.4	ENSG00000205476	CCDC85C
ENSG00000110104.7	ENSG00000110104	CCDC86
ENSG00000115355.11	ENSG00000115355	CCDC88A
ENSG00000137500.5	ENSG00000137500	CCDC90B
ENSG00000145386.5	ENSG00000145386	CCNA2
ENSG00000134057.10	ENSG00000134057	CCNB1
ENSG00000100814.13	ENSG00000100814	CCNB1IP1
ENSG00000157456.3	ENSG00000157456	CCNB2
ENSG00000112237.8	ENSG00000112237	CCNC
ENSG00000110092.3	ENSG00000110092	CCND1
ENSG00000118971.3	ENSG00000118971	CCND2
ENSG00000112576.8	ENSG00000112576	CCND3
ENSG00000166946.9	ENSG00000166946	CCNDBP1
ENSG00000105173.9	ENSG00000105173	CCNE1
ENSG00000175305.12	ENSG00000175305	CCNE2
ENSG00000162063.8	ENSG00000162063	CCNF
ENSG00000113328.14	ENSG00000113328	CCNG1
ENSG00000138764.9	ENSG00000138764	CCNG2
ENSG00000134480.9	ENSG00000134480	CCNH
ENSG00000118816.5	ENSG00000118816	CCNI
ENSG00000107443.11	ENSG00000107443	CCNJ
ENSG00000135083.10	ENSG00000135083	CCNJL
ENSG00000090061.13	ENSG00000090061	CCNK
ENSG00000163660.7	ENSG00000163660	CCNL1
ENSG00000221978.7	ENSG00000221978	CCNL2
ENSG00000129315.5	ENSG00000129315	CCNT1
ENSG00000082258.8	ENSG00000082258	CCNT2
ENSG00000108100.13	ENSG00000108100	CCNY
ENSG00000103540.12	ENSG00000103540	CCP110
ENSG00000154429.6	ENSG00000154429	CCSAP
ENSG00000107771.11	ENSG00000107771	CCSER2
ENSG00000166226.8	ENSG00000166226	CCT2
ENSG00000163468.10	ENSG00000163468	CCT3
ENSG00000115484.10	ENSG00000115484	CCT4
ENSG00000150753.7	ENSG00000150753	CCT5
ENSG00000146731.6	ENSG00000146731	CCT6A
ENSG00000234585.2	ENSG00000234585	CCT6P3
ENSG00000135624.11	ENSG00000135624	CCT7
ENSG00000156261.8	ENSG00000156261	CCT8
ENSG00000122674.8	ENSG00000122674	CCZ1
ENSG00000135535.10	ENSG00000135535	CD164
ENSG00000091972.14	ENSG00000091972	CD200
ENSG00000185275.6	ENSG00000185275	CD24P4
ENSG00000103855.13	ENSG00000103855	CD276
ENSG00000198087.7	ENSG00000198087	CD2AP
ENSG00000169217.4	ENSG00000169217	CD2BP2
ENSG00000167775.6	ENSG00000167775	CD320
ENSG00000117335.14	ENSG00000117335	CD46
ENSG00000196776.10	ENSG00000196776	CD47
ENSG00000116815.11	ENSG00000116815	CD58
ENSG00000085063.10	ENSG00000085063	CD59
ENSG00000135404.7	ENSG00000135404	CD63
ENSG00000019582.10	ENSG00000019582	CD74
ENSG00000085117.7	ENSG00000085117	CD82
ENSG00000010278.7	ENSG00000010278	CD9
ENSG00000002586.13	ENSG00000002586	CD99
ENSG00000102543.10	ENSG00000102543	CDADC1
ENSG00000140326.8	ENSG00000140326	CDAN1
ENSG00000151465.9	ENSG00000151465	CDC123
ENSG00000079335.13	ENSG00000079335	CDC14A
ENSG00000130177.10	ENSG00000130177	CDC16
ENSG00000117399.9	ENSG00000117399	CDC20
ENSG00000094880.6	ENSG00000094880	CDC23
ENSG00000164045.7	ENSG00000164045	CDC25A
ENSG00000101224.13	ENSG00000101224	CDC25B
ENSG00000158402.14	ENSG00000158402	CDC25C
ENSG00000176386.4	ENSG00000176386	CDC26
ENSG00000004897.7	ENSG00000004897	CDC27
ENSG00000106993.7	ENSG00000106993	CDC37L1
ENSG00000070831.11	ENSG00000070831	CDC42
ENSG00000143776.14	ENSG00000143776	CDC42BPA
ENSG00000163171.6	ENSG00000163171	CDC42EP3
ENSG00000179604.8	ENSG00000179604	CDC42EP4
ENSG00000197622.8	ENSG00000197622	CDC42SE1
ENSG00000158985.9	ENSG00000158985	CDC42SE2
ENSG00000093009.5	ENSG00000093009	CDC45
ENSG00000096401.7	ENSG00000096401	CDC5L
ENSG00000094804.5	ENSG00000094804	CDC6
ENSG00000097046.8	ENSG00000097046	CDC7
ENSG00000134371.9	ENSG00000134371	CDC73
ENSG00000184661.9	ENSG00000184661	CDCA2
ENSG00000111665.7	ENSG00000111665	CDCA3
ENSG00000170779.10	ENSG00000170779	CDCA4
ENSG00000146670.5	ENSG00000146670	CDCA5
ENSG00000144354.9	ENSG00000144354	CDCA7
ENSG00000164649.15	ENSG00000164649	CDCA7L
ENSG00000134690.6	ENSG00000134690	CDCA8
ENSG00000040731.6	ENSG00000040731	CDH10
ENSG00000140937.9	ENSG00000140937	CDH11
ENSG00000170558.4	ENSG00000170558	CDH2
ENSG00000113361.8	ENSG00000113361	CDH6
ENSG00000081138.9	ENSG00000081138	CDH7
ENSG00000089486.12	ENSG00000089486	CDIP1
ENSG00000170312.11	ENSG00000170312	CDK1
ENSG00000167258.9	ENSG00000167258	CDK12
ENSG00000065883.10	ENSG00000065883	CDK13
ENSG00000058091.12	ENSG00000058091	CDK14
ENSG00000102225.11	ENSG00000102225	CDK16
ENSG00000059758.3	ENSG00000059758	CDK17
ENSG00000155111.10	ENSG00000155111	CDK19
ENSG00000123374.6	ENSG00000123374	CDK2
ENSG00000111328.2	ENSG00000111328	CDK2AP1
ENSG00000167797.3	ENSG00000167797	CDK2AP2
ENSG00000135446.12	ENSG00000135446	CDK4
ENSG00000176749.4	ENSG00000176749	CDK5R1
ENSG00000101391.16	ENSG00000101391	CDK5RAP1
ENSG00000136861.13	ENSG00000136861	CDK5RAP2
ENSG00000108465.10	ENSG00000108465	CDK5RAP3
ENSG00000105810.5	ENSG00000105810	CDK6
ENSG00000134058.6	ENSG00000134058	CDK7
ENSG00000132964.7	ENSG00000132964	CDK8
ENSG00000136807.7	ENSG00000136807	CDK9
ENSG00000145996.7	ENSG00000145996	CDKAL1
ENSG00000138769.6	ENSG00000138769	CDKL2
ENSG00000124762.9	ENSG00000124762	CDKN1A
ENSG00000111276.6	ENSG00000111276	CDKN1B
ENSG00000129757.8	ENSG00000129757	CDKN1C
ENSG00000168564.5	ENSG00000168564	CDKN2AIP
ENSG00000237190.3	ENSG00000237190	CDKN2AIPNL
ENSG00000100526.15	ENSG00000100526	CDKN3
ENSG00000129596.4	ENSG00000129596	CDO1
ENSG00000064309.10	ENSG00000064309	CDON
ENSG00000205643.6	ENSG00000205643	CDPF1
ENSG00000184258.5	ENSG00000184258	CDR1
ENSG00000140743.3	ENSG00000140743	CDR2
ENSG00000109089.7	ENSG00000109089	CDR2L
ENSG00000101290.9	ENSG00000101290	CDS2
ENSG00000091527.11	ENSG00000091527	CDV3
ENSG00000165556.9	ENSG00000165556	CDX2
ENSG00000153046.13	ENSG00000153046	CDYL
ENSG00000153879.4	ENSG00000153879	CEBPG
ENSG00000115816.9	ENSG00000115816	CEBPZ
ENSG00000218739.5	ENSG00000218739	CEBPZOS
ENSG00000149187.13	ENSG00000149187	CELF1
ENSG00000048740.13	ENSG00000048740	CELF2
ENSG00000101489.14	ENSG00000101489	CELF4
ENSG00000143126.7	ENSG00000143126	CELSR2
ENSG00000008300.10	ENSG00000008300	CELSR3
ENSG00000213753.6	ENSG00000213753	CENPBD1P1
ENSG00000145241.6	ENSG00000145241	CENPC
ENSG00000138778.7	ENSG00000138778	CENPE
ENSG00000117724.8	ENSG00000117724	CENPF
ENSG00000153044.5	ENSG00000153044	CENPH
ENSG00000102384.9	ENSG00000102384	CENPI
ENSG00000151849.10	ENSG00000151849	CENPJ
ENSG00000123219.8	ENSG00000123219	CENPK
ENSG00000120334.11	ENSG00000120334	CENPL
ENSG00000100162.10	ENSG00000100162	CENPM
ENSG00000166451.9	ENSG00000166451	CENPN
ENSG00000138092.6	ENSG00000138092	CENPO
ENSG00000031691.6	ENSG00000031691	CENPQ
ENSG00000102901.8	ENSG00000102901	CENPT
ENSG00000151725.7	ENSG00000151725	CENPU
ENSG00000166582.5	ENSG00000166582	CENPV
ENSG00000203760.4	ENSG00000203760	CENPW
ENSG00000169689.10	ENSG00000169689	CENPX
ENSG00000154240.12	ENSG00000154240	CEP112
ENSG00000168944.11	ENSG00000168944	CEP120
ENSG00000110318.9	ENSG00000110318	CEP126
ENSG00000100629.12	ENSG00000100629	CEP128
ENSG00000174799.6	ENSG00000174799	CEP135
ENSG00000103995.9	ENSG00000103995	CEP152
ENSG00000135315.7	ENSG00000135315	CEP162
ENSG00000143702.11	ENSG00000143702	CEP170
ENSG00000154608.9	ENSG00000154608	CEP170P1
ENSG00000174007.7	ENSG00000174007	CEP19
ENSG00000101639.14	ENSG00000101639	CEP192
ENSG00000126001.11	ENSG00000126001	CEP250
ENSG00000198707.10	ENSG00000198707	CEP290
ENSG00000166004.10	ENSG00000166004	CEP295
ENSG00000135837.11	ENSG00000135837	CEP350
ENSG00000106477.14	ENSG00000106477	CEP41
ENSG00000164118.8	ENSG00000164118	CEP44
ENSG00000138180.11	ENSG00000138180	CEP55
ENSG00000166037.6	ENSG00000166037	CEP57
ENSG00000183137.10	ENSG00000183137	CEP57L1
ENSG00000182923.12	ENSG00000182923	CEP63
ENSG00000011523.9	ENSG00000011523	CEP68
ENSG00000114107.4	ENSG00000114107	CEP70
ENSG00000148019.8	ENSG00000148019	CEP78
ENSG00000173588.10	ENSG00000173588	CEP83
ENSG00000130695.9	ENSG00000130695	CEP85
ENSG00000111860.9	ENSG00000111860	CEP85L
ENSG00000121289.13	ENSG00000121289	CEP89
ENSG00000258890.2	ENSG00000258890	CEP95
ENSG00000182504.6	ENSG00000182504	CEP97
ENSG00000134255.9	ENSG00000134255	CEPT1
ENSG00000100422.9	ENSG00000100422	CERK
ENSG00000143418.15	ENSG00000143418	CERS2
ENSG00000139624.8	ENSG00000139624	CERS5
ENSG00000172292.10	ENSG00000172292	CERS6
ENSG00000147400.8	ENSG00000147400	CETN2
ENSG00000153140.4	ENSG00000153140	CETN3
ENSG00000070761.3	ENSG00000070761	CFAP20
ENSG00000163001.7	ENSG00000163001	CFAP36
ENSG00000188596.5	ENSG00000188596	CFAP54
ENSG00000105792.15	ENSG00000105792	CFAP69
ENSG00000164323.8	ENSG00000164323	CFAP97
ENSG00000153774.4	ENSG00000153774	CFDP1
ENSG00000172757.8	ENSG00000172757	CFL1
ENSG00000165410.10	ENSG00000165410	CFL2
ENSG00000003402.15	ENSG00000003402	CFLAR
ENSG00000163320.6	ENSG00000163320	CGGBP1
ENSG00000100532.7	ENSG00000100532	CGRRF1
ENSG00000143942.4	ENSG00000143942	CHAC2
ENSG00000167670.11	ENSG00000167670	CHAF1A
ENSG00000159259.7	ENSG00000159259	CHAF1B
ENSG00000172586.7	ENSG00000172586	CHCHD1
ENSG00000106153.12	ENSG00000106153	CHCHD2
ENSG00000106554.7	ENSG00000106554	CHCHD3
ENSG00000163528.8	ENSG00000163528	CHCHD4
ENSG00000125611.11	ENSG00000125611	CHCHD5
ENSG00000159685.6	ENSG00000159685	CHCHD6
ENSG00000170791.13	ENSG00000170791	CHCHD7
ENSG00000153922.6	ENSG00000153922	CHD1
ENSG00000131778.13	ENSG00000131778	CHD1L
ENSG00000173575.14	ENSG00000173575	CHD2
ENSG00000111642.10	ENSG00000111642	CHD4
ENSG00000124177.10	ENSG00000124177	CHD6
ENSG00000171316.7	ENSG00000171316	CHD7
ENSG00000100888.8	ENSG00000100888	CHD8
ENSG00000177200.11	ENSG00000177200	CHD9
ENSG00000149554.8	ENSG00000149554	CHEK1
ENSG00000183765.16	ENSG00000183765	CHEK2
ENSG00000204116.7	ENSG00000204116	CHIC1
ENSG00000177830.13	ENSG00000177830	CHID1
ENSG00000110721.7	ENSG00000110721	CHKA
ENSG00000188419.9	ENSG00000188419	CHM
ENSG00000203668.1	ENSG00000203668	CHML
ENSG00000255112.2	ENSG00000255112	CHMP1B
ENSG00000130724.4	ENSG00000130724	CHMP2A
ENSG00000083937.4	ENSG00000083937	CHMP2B
ENSG00000115561.10	ENSG00000115561	CHMP3
ENSG00000086065.9	ENSG00000086065	CHMP5
ENSG00000128656.9	ENSG00000128656	CHN1
ENSG00000110172.7	ENSG00000110172	CHORDC1
ENSG00000187446.7	ENSG00000187446	CHP1
ENSG00000104472.5	ENSG00000104472	CHRAC1
ENSG00000101938.10	ENSG00000101938	CHRDL1
ENSG00000175344.12	ENSG00000175344	CHRNA7
ENSG00000170175.6	ENSG00000170175	CHRNB1
ENSG00000160716.4	ENSG00000160716	CHRNB2
ENSG00000171310.6	ENSG00000171310	CHST11
ENSG00000169105.6	ENSG00000169105	CHST14
ENSG00000122863.5	ENSG00000122863	CHST3
ENSG00000131873.5	ENSG00000131873	CHSY1
ENSG00000160679.8	ENSG00000160679	CHTOP
ENSG00000213341.6	ENSG00000213341	CHUK
ENSG00000258289.3	ENSG00000258289	CHURC1
ENSG00000144021.2	ENSG00000144021	CIAO1
ENSG00000005194.10	ENSG00000005194	CIAPIN1
ENSG00000263846.1	ENSG00000263846	CIAPIN1P
ENSG00000186162.6	ENSG00000186162	CIDECP
ENSG00000100865.10	ENSG00000100865	CINP
ENSG00000163507.9	ENSG00000163507	CIP2A
ENSG00000198894.3	ENSG00000198894	CIPC
ENSG00000138433.11	ENSG00000138433	CIR1
ENSG00000099622.9	ENSG00000099622	CIRBP
ENSG00000122873.7	ENSG00000122873	CISD1
ENSG00000145354.5	ENSG00000145354	CISD2
ENSG00000122966.9	ENSG00000122966	CIT
ENSG00000136108.10	ENSG00000136108	CKAP2
ENSG00000169607.8	ENSG00000169607	CKAP2L
ENSG00000136026.9	ENSG00000136026	CKAP4
ENSG00000175216.10	ENSG00000175216	CKAP5
ENSG00000166165.8	ENSG00000166165	CKB
ENSG00000223572.5	ENSG00000223572	CKMT1A
ENSG00000237289.5	ENSG00000237289	CKMT1B
ENSG00000173207.8	ENSG00000173207	CKS1B
ENSG00000225976.4	ENSG00000225976	CKS1BP2
ENSG00000268942.1	ENSG00000268942	CKS1BP3
ENSG00000123975.4	ENSG00000123975	CKS2
ENSG00000074054.13	ENSG00000074054	CLASP1
ENSG00000163539.11	ENSG00000163539	CLASP2
ENSG00000121940.11	ENSG00000121940	CLCC1
ENSG00000109572.9	ENSG00000109572	CLCN3
ENSG00000073464.7	ENSG00000073464	CLCN4
ENSG00000171365.11	ENSG00000171365	CLCN5
ENSG00000157224.11	ENSG00000157224	CLDN12
ENSG00000080822.12	ENSG00000080822	CLDND1
ENSG00000069493.10	ENSG00000069493	CLEC2D
ENSG00000166509.6	ENSG00000166509	CLEC3A
ENSG00000111729.8	ENSG00000111729	CLEC4A
ENSG00000153132.8	ENSG00000153132	CLGN
ENSG00000162994.11	ENSG00000162994	CLHC1
ENSG00000213719.4	ENSG00000213719	CLIC1
ENSG00000169504.10	ENSG00000169504	CLIC4
ENSG00000113282.9	ENSG00000113282	CLINT1
ENSG00000130779.15	ENSG00000130779	CLIP1
ENSG00000105270.10	ENSG00000105270	CLIP3
ENSG00000115295.15	ENSG00000115295	CLIP4
ENSG00000013441.11	ENSG00000013441	CLK1
ENSG00000176444.14	ENSG00000176444	CLK2
ENSG00000179335.14	ENSG00000179335	CLK3
ENSG00000113240.8	ENSG00000113240	CLK4
ENSG00000165959.7	ENSG00000165959	CLMN
ENSG00000188603.12	ENSG00000188603	CLN3
ENSG00000102805.9	ENSG00000102805	CLN5
ENSG00000074201.4	ENSG00000074201	CLNS1A
ENSG00000134852.10	ENSG00000134852	CLOCK
ENSG00000172409.5	ENSG00000172409	CLP1
ENSG00000163646.6	ENSG00000163646	CLRN1
ENSG00000092853.9	ENSG00000092853	CLSPN
ENSG00000171603.12	ENSG00000171603	CLSTN1
ENSG00000158258.11	ENSG00000158258	CLSTN2
ENSG00000122705.12	ENSG00000122705	CLTA
ENSG00000141367.7	ENSG00000141367	CLTC
ENSG00000120885.15	ENSG00000120885	CLU
ENSG00000103351.8	ENSG00000103351	CLUAP1
ENSG00000131797.8	ENSG00000131797	CLUHP3
ENSG00000177182.6	ENSG00000177182	CLVS1
ENSG00000146352.8	ENSG00000146352	CLVS2
ENSG00000111726.8	ENSG00000111726	CMAS
ENSG00000164237.4	ENSG00000164237	CMBL
ENSG00000187118.8	ENSG00000187118	CMC1
ENSG00000103121.4	ENSG00000103121	CMC2
ENSG00000162368.9	ENSG00000162368	CMPK1
ENSG00000184220.6	ENSG00000184220	CMSS1
ENSG00000140931.15	ENSG00000140931	CMTM3
ENSG00000183723.8	ENSG00000183723	CMTM4
ENSG00000091317.7	ENSG00000091317	CMTM6
ENSG00000153551.9	ENSG00000153551	CMTM7
ENSG00000180917.12	ENSG00000180917	CMTR2
ENSG00000164309.10	ENSG00000164309	CMYA5
ENSG00000169714.12	ENSG00000169714	CNBP
ENSG00000133313.10	ENSG00000133313	CNDP2
ENSG00000205423.7	ENSG00000205423	CNEP1R1
ENSG00000100528.7	ENSG00000100528	CNIH1
ENSG00000143771.7	ENSG00000143771	CNIH4
ENSG00000149970.10	ENSG00000149970	CNKSR2
ENSG00000064666.10	ENSG00000064666	CNN2
ENSG00000117519.11	ENSG00000117519	CNN3
ENSG00000168763.11	ENSG00000168763	CNNM3
ENSG00000125107.12	ENSG00000125107	CNOT1
ENSG00000182973.14	ENSG00000182973	CNOT10
ENSG00000158435.3	ENSG00000158435	CNOT11
ENSG00000111596.7	ENSG00000111596	CNOT2
ENSG00000080802.14	ENSG00000080802	CNOT4
ENSG00000113300.7	ENSG00000113300	CNOT6
ENSG00000138767.8	ENSG00000138767	CNOT6L
ENSG00000198791.7	ENSG00000198791	CNOT7
ENSG00000155508.9	ENSG00000155508	CNOT8
ENSG00000144580.9	ENSG00000144580	CNOT9
ENSG00000173786.12	ENSG00000173786	CNP
ENSG00000115649.11	ENSG00000115649	CNPPD1
ENSG00000257727.1	ENSG00000257727	CNPY2
ENSG00000137161.12	ENSG00000137161	CNPY3
ENSG00000119865.4	ENSG00000119865	CNRIP1
ENSG00000162852.9	ENSG00000162852	CNST
ENSG00000044459.10	ENSG00000044459	CNTLN
ENSG00000174469.13	ENSG00000174469	CNTNAP2
ENSG00000154529.10	ENSG00000154529	CNTNAP3B
ENSG00000119397.12	ENSG00000119397	CNTRL
ENSG00000106603.13	ENSG00000106603	COA1
ENSG00000183978.7	ENSG00000183978	COA3
ENSG00000181924.6	ENSG00000181924	COA4
ENSG00000183513.4	ENSG00000183513	COA5
ENSG00000168275.10	ENSG00000168275	COA6
ENSG00000162377.4	ENSG00000162377	COA7
ENSG00000068120.10	ENSG00000068120	COASY
ENSG00000100473.11	ENSG00000100473	COCH
ENSG00000135775.9	ENSG00000135775	COG2
ENSG00000136152.10	ENSG00000136152	COG3
ENSG00000103051.14	ENSG00000103051	COG4
ENSG00000164597.9	ENSG00000164597	COG5
ENSG00000133103.12	ENSG00000133103	COG6
ENSG00000121058.4	ENSG00000121058	COIL
ENSG00000060718.14	ENSG00000060718	COL11A1
ENSG00000187955.7	ENSG00000187955	COL14A1
ENSG00000139219.13	ENSG00000139219	COL2A1
ENSG00000187498.10	ENSG00000187498	COL4A1
ENSG00000113163.11	ENSG00000113163	COL4A3BP
ENSG00000188153.8	ENSG00000188153	COL4A5
ENSG00000197565.11	ENSG00000197565	COL4A6
ENSG00000204262.7	ENSG00000204262	COL5A2
ENSG00000142156.10	ENSG00000142156	COL6A1
ENSG00000112280.11	ENSG00000112280	COL9A1
ENSG00000130309.6	ENSG00000130309	COLGALT1
ENSG00000198756.6	ENSG00000198756	COLGALT2
ENSG00000206561.8	ENSG00000206561	COLQ
ENSG00000173163.6	ENSG00000173163	COMMD1
ENSG00000145781.4	ENSG00000145781	COMMD10
ENSG00000114744.4	ENSG00000114744	COMMD2
ENSG00000148444.11	ENSG00000148444	COMMD3
ENSG00000140365.11	ENSG00000140365	COMMD4
ENSG00000170619.8	ENSG00000170619	COMMD5
ENSG00000188243.8	ENSG00000188243	COMMD6
ENSG00000149600.7	ENSG00000149600	COMMD7
ENSG00000169019.9	ENSG00000169019	COMMD8
ENSG00000110442.7	ENSG00000110442	COMMD9
ENSG00000122218.10	ENSG00000122218	COPA
ENSG00000129083.8	ENSG00000129083	COPB1
ENSG00000184432.5	ENSG00000184432	COPB2
ENSG00000166200.10	ENSG00000166200	COPS2
ENSG00000141030.8	ENSG00000141030	COPS3
ENSG00000138663.4	ENSG00000138663	COPS4
ENSG00000121022.9	ENSG00000121022	COPS5
ENSG00000168090.5	ENSG00000168090	COPS6
ENSG00000111652.5	ENSG00000111652	COPS7A
ENSG00000144524.13	ENSG00000144524	COPS7B
ENSG00000198612.6	ENSG00000198612	COPS8
ENSG00000172428.6	ENSG00000172428	COPS9
ENSG00000111481.5	ENSG00000111481	COPZ1
ENSG00000135469.9	ENSG00000135469	COQ10A
ENSG00000115520.4	ENSG00000115520	COQ10B
ENSG00000132423.6	ENSG00000132423	COQ3
ENSG00000167113.6	ENSG00000167113	COQ4
ENSG00000110871.10	ENSG00000110871	COQ5
ENSG00000167186.6	ENSG00000167186	COQ7
ENSG00000123815.7	ENSG00000123815	COQ8B
ENSG00000088682.9	ENSG00000088682	COQ9
ENSG00000110880.6	ENSG00000110880	CORO1C
ENSG00000103647.8	ENSG00000103647	CORO2B
ENSG00000103187.6	ENSG00000103187	COTL1
ENSG00000006695.6	ENSG00000006695	COX10
ENSG00000236088.5	ENSG00000236088	COX10-AS1
ENSG00000166260.6	ENSG00000166260	COX11
ENSG00000178449.4	ENSG00000178449	COX14
ENSG00000014919.8	ENSG00000014919	COX15
ENSG00000133983.10	ENSG00000133983	COX16
ENSG00000163626.12	ENSG00000163626	COX18
ENSG00000131143.4	ENSG00000131143	COX4I1
ENSG00000135940.2	ENSG00000135940	COX5B
ENSG00000111775.2	ENSG00000111775	COX6A1
ENSG00000226976.1	ENSG00000226976	COX6A1P2
ENSG00000126267.4	ENSG00000126267	COX6B1
ENSG00000164919.6	ENSG00000164919	COX6C
ENSG00000112695.7	ENSG00000112695	COX7A2
ENSG00000115944.10	ENSG00000115944	COX7A2L
ENSG00000131174.4	ENSG00000131174	COX7B
ENSG00000127184.6	ENSG00000127184	COX7C
ENSG00000176340.3	ENSG00000176340	COX8A
ENSG00000047457.9	ENSG00000047457	CP
ENSG00000108582.7	ENSG00000108582	CPD
ENSG00000109472.9	ENSG00000109472	CPE
ENSG00000137449.11	ENSG00000137449	CPEB2
ENSG00000107864.10	ENSG00000107864	CPEB3
ENSG00000113742.8	ENSG00000113742	CPEB4
ENSG00000214078.7	ENSG00000214078	CPNE1
ENSG00000140848.12	ENSG00000140848	CPNE2
ENSG00000085719.7	ENSG00000085719	CPNE3
ENSG00000196353.7	ENSG00000196353	CPNE4
ENSG00000139117.9	ENSG00000139117	CPNE8
ENSG00000080819.2	ENSG00000080819	CPOX
ENSG00000103381.7	ENSG00000103381	CPPED1
ENSG00000071894.10	ENSG00000071894	CPSF1
ENSG00000165934.8	ENSG00000165934	CPSF2
ENSG00000119203.9	ENSG00000119203	CPSF3
ENSG00000160917.10	ENSG00000160917	CPSF4
ENSG00000111605.12	ENSG00000111605	CPSF6
ENSG00000149532.11	ENSG00000149532	CPSF7
ENSG00000169169.10	ENSG00000169169	CPT1C
ENSG00000157184.5	ENSG00000157184	CPT2
ENSG00000106066.9	ENSG00000106066	CPVL
ENSG00000088882.7	ENSG00000088882	CPXM1
ENSG00000166426.7	ENSG00000166426	CRABP1
ENSG00000143320.4	ENSG00000143320	CRABP2
ENSG00000169372.8	ENSG00000169372	CRADD
ENSG00000113851.9	ENSG00000113851	CRBN
ENSG00000241258.2	ENSG00000241258	CRCP
ENSG00000118260.10	ENSG00000118260	CREB1
ENSG00000107175.6	ENSG00000107175	CREB3
ENSG00000182158.10	ENSG00000182158	CREB3L2
ENSG00000143578.11	ENSG00000143578	CREB3L4
ENSG00000146592.12	ENSG00000146592	CREB5
ENSG00000005339.8	ENSG00000005339	CREBBP
ENSG00000111269.2	ENSG00000111269	CREBL2
ENSG00000137504.9	ENSG00000137504	CREBZF
ENSG00000143162.7	ENSG00000143162	CREG1
ENSG00000163703.13	ENSG00000163703	CRELD1
ENSG00000095794.15	ENSG00000095794	CREM
ENSG00000150938.5	ENSG00000150938	CRIM1
ENSG00000182809.6	ENSG00000182809	CRIP2
ENSG00000179979.7	ENSG00000179979	CRIPAK
ENSG00000119878.5	ENSG00000119878	CRIPT
ENSG00000121005.4	ENSG00000121005	CRISPLD1
ENSG00000167193.7	ENSG00000167193	CRK
ENSG00000099942.8	ENSG00000099942	CRKL
ENSG00000176390.10	ENSG00000176390	CRLF3
ENSG00000088766.7	ENSG00000088766	CRLS1
ENSG00000072832.10	ENSG00000072832	CRMP1
ENSG00000245694.4	ENSG00000245694	CRNDE
ENSG00000101343.10	ENSG00000101343	CRNKL1
ENSG00000005469.7	ENSG00000005469	CROT
ENSG00000170275.10	ENSG00000170275	CRTAP
ENSG00000140577.11	ENSG00000140577	CRTC3
ENSG00000105392.11	ENSG00000105392	CRX
ENSG00000008405.7	ENSG00000008405	CRY1
ENSG00000100058.8	ENSG00000100058	CRYBB2P1
ENSG00000165475.9	ENSG00000165475	CRYL1
ENSG00000205758.7	ENSG00000205758	CRYZL1
ENSG00000062485.14	ENSG00000062485	CS
ENSG00000009307.11	ENSG00000009307	CSDE1
ENSG00000124207.12	ENSG00000124207	CSE1L
ENSG00000113712.12	ENSG00000113712	CSNK1A1
ENSG00000223518.5	ENSG00000223518	CSNK1A1P1
ENSG00000213923.6	ENSG00000213923	CSNK1E
ENSG00000169118.11	ENSG00000169118	CSNK1G1
ENSG00000151292.13	ENSG00000151292	CSNK1G3
ENSG00000101266.12	ENSG00000101266	CSNK2A1
ENSG00000070770.4	ENSG00000070770	CSNK2A2
ENSG00000204435.9	ENSG00000204435	CSNK2B
ENSG00000104218.9	ENSG00000104218	CSPP1
ENSG00000110925.2	ENSG00000110925	CSRNP2
ENSG00000178662.11	ENSG00000178662	CSRNP3
ENSG00000159176.9	ENSG00000159176	CSRP1
ENSG00000175183.5	ENSG00000175183	CSRP2
ENSG00000160213.5	ENSG00000160213	CSTB
ENSG00000101138.7	ENSG00000101138	CSTF1
ENSG00000101811.9	ENSG00000101811	CSTF2
ENSG00000177613.7	ENSG00000177613	CSTF2T
ENSG00000176102.7	ENSG00000176102	CSTF3
ENSG00000159692.11	ENSG00000159692	CTBP1
ENSG00000196810.4	ENSG00000196810	CTBP1-AS2
ENSG00000175029.12	ENSG00000175029	CTBP2
ENSG00000117151.8	ENSG00000117151	CTBS
ENSG00000102974.10	ENSG00000102974	CTCF
ENSG00000175215.5	ENSG00000175215	CTDSP2
ENSG00000144677.10	ENSG00000144677	CTDSPL
ENSG00000137770.9	ENSG00000137770	CTDSPL2
ENSG00000118523.5	ENSG00000118523	CTGF
ENSG00000116761.7	ENSG00000116761	CTH
ENSG00000044115.16	ENSG00000044115	CTNNA1
ENSG00000119326.10	ENSG00000119326	CTNNAL1
ENSG00000168036.12	ENSG00000168036	CTNNB1
ENSG00000178585.10	ENSG00000178585	CTNNBIP1
ENSG00000132792.14	ENSG00000132792	CTNNBL1
ENSG00000198561.8	ENSG00000198561	CTNND1
ENSG00000169862.14	ENSG00000169862	CTNND2
ENSG00000171793.9	ENSG00000171793	CTPS1
ENSG00000047230.10	ENSG00000047230	CTPS2
ENSG00000198730.3	ENSG00000198730	CTR9
ENSG00000164733.16	ENSG00000164733	CTSB
ENSG00000109861.11	ENSG00000109861	CTSC
ENSG00000135047.10	ENSG00000135047	CTSL
ENSG00000136943.6	ENSG00000136943	CTSV
ENSG00000085733.11	ENSG00000085733	CTTN
ENSG00000143079.10	ENSG00000143079	CTTNBP2NL
ENSG00000107874.6	ENSG00000107874	CUEDC2
ENSG00000055130.11	ENSG00000055130	CUL1
ENSG00000108094.10	ENSG00000108094	CUL2
ENSG00000036257.8	ENSG00000036257	CUL3
ENSG00000139842.10	ENSG00000139842	CUL4A
ENSG00000158290.12	ENSG00000158290	CUL4B
ENSG00000166266.9	ENSG00000166266	CUL5
ENSG00000112514.11	ENSG00000112514	CUTA
ENSG00000119929.8	ENSG00000119929	CUTC
ENSG00000257923.5	ENSG00000257923	CUX1
ENSG00000150316.7	ENSG00000150316	CWC15
ENSG00000163510.9	ENSG00000163510	CWC22
ENSG00000153015.11	ENSG00000153015	CWC27
ENSG00000095485.12	ENSG00000095485	CWF19L1
ENSG00000154639.14	ENSG00000154639	CXADR
ENSG00000121966.6	ENSG00000121966	CXCR4
ENSG00000197620.6	ENSG00000197620	CXorf40A
ENSG00000197021.4	ENSG00000197021	CXorf40B
ENSG00000018610.9	ENSG00000018610	CXorf56
ENSG00000154832.10	ENSG00000154832	CXXC1
ENSG00000168772.9	ENSG00000168772	CXXC4
ENSG00000171604.7	ENSG00000171604	CXXC5
ENSG00000114395.6	ENSG00000114395	CYB561D2
ENSG00000166347.14	ENSG00000166347	CYB5A
ENSG00000103018.12	ENSG00000103018	CYB5B
ENSG00000182224.7	ENSG00000182224	CYB5D1
ENSG00000167740.5	ENSG00000167740	CYB5D2
ENSG00000159348.8	ENSG00000159348	CYB5R1
ENSG00000166394.10	ENSG00000166394	CYB5R2
ENSG00000100243.16	ENSG00000100243	CYB5R3
ENSG00000071967.7	ENSG00000071967	CYBRD1
ENSG00000179091.4	ENSG00000179091	CYC1
ENSG00000172115.4	ENSG00000172115	CYCS
ENSG00000055163.14	ENSG00000055163	CYFIP2
ENSG00000083799.13	ENSG00000083799	CYLD
ENSG00000119004.10	ENSG00000119004	CYP20A1
ENSG00000186684.8	ENSG00000186684	CYP27C1
ENSG00000186104.6	ENSG00000186104	CYP2R1
ENSG00000155016.13	ENSG00000155016	CYP2U1
ENSG00000142871.11	ENSG00000142871	CYR61
ENSG00000173198.4	ENSG00000173198	CYSLTR1
ENSG00000120306.5	ENSG00000120306	CYSTM1
ENSG00000166265.7	ENSG00000166265	CYYR1
ENSG00000100592.11	ENSG00000100592	DAAM1
ENSG00000153071.10	ENSG00000153071	DAB2
ENSG00000126733.16	ENSG00000126733	DACH2
ENSG00000129562.6	ENSG00000129562	DAD1
ENSG00000173402.7	ENSG00000173402	DAG1
ENSG00000178149.12	ENSG00000178149	DALRD3
ENSG00000226950.2	ENSG00000226950	DANCR
ENSG00000112977.11	ENSG00000112977	DAP
ENSG00000132676.11	ENSG00000132676	DAP3
ENSG00000196730.8	ENSG00000196730	DAPK1
ENSG00000236709.1	ENSG00000236709	DAPK1-IT1
ENSG00000115866.6	ENSG00000115866	DARS
ENSG00000117593.8	ENSG00000117593	DARS2
ENSG00000204209.6	ENSG00000204209	DAXX
ENSG00000183283.11	ENSG00000183283	DAZAP2
ENSG00000006634.3	ENSG00000006634	DBF4
ENSG00000161692.13	ENSG00000161692	DBF4B
ENSG00000155368.12	ENSG00000155368	DBI
ENSG00000113758.9	ENSG00000113758	DBN1
ENSG00000136279.14	ENSG00000136279	DBNL
ENSG00000138231.8	ENSG00000138231	DBR1
ENSG00000137992.10	ENSG00000137992	DBT
ENSG00000185610.6	ENSG00000185610	DBX2
ENSG00000145041.11	ENSG00000145041	DCAF1
ENSG00000122741.11	ENSG00000122741	DCAF10
ENSG00000100897.13	ENSG00000100897	DCAF11
ENSG00000198876.8	ENSG00000198876	DCAF12
ENSG00000164934.9	ENSG00000164934	DCAF13
ENSG00000163257.6	ENSG00000163257	DCAF16
ENSG00000139990.13	ENSG00000139990	DCAF5
ENSG00000143164.11	ENSG00000143164	DCAF6
ENSG00000136485.10	ENSG00000136485	DCAF7
ENSG00000132716.14	ENSG00000132716	DCAF8
ENSG00000172992.7	ENSG00000172992	DCAKD
ENSG00000164465.14	ENSG00000164465	DCBLD1
ENSG00000057019.11	ENSG00000057019	DCBLD2
ENSG00000187323.7	ENSG00000187323	DCC
ENSG00000197410.8	ENSG00000197410	DCHS2
ENSG00000156136.5	ENSG00000156136	DCK
ENSG00000133083.10	ENSG00000133083	DCLK1
ENSG00000198924.3	ENSG00000198924	DCLRE1A
ENSG00000152457.13	ENSG00000152457	DCLRE1C
ENSG00000151065.9	ENSG00000151065	DCP1B
ENSG00000172795.11	ENSG00000172795	DCP2
ENSG00000110063.4	ENSG00000110063	DCPS
ENSG00000129187.10	ENSG00000129187	DCTD
ENSG00000204843.8	ENSG00000204843	DCTN1
ENSG00000175203.11	ENSG00000175203	DCTN2
ENSG00000137100.11	ENSG00000137100	DCTN3
ENSG00000132912.8	ENSG00000132912	DCTN4
ENSG00000166847.5	ENSG00000166847	DCTN5
ENSG00000104671.3	ENSG00000104671	DCTN6
ENSG00000179958.4	ENSG00000179958	DCTPP1
ENSG00000043093.9	ENSG00000043093	DCUN1D1
ENSG00000188215.5	ENSG00000188215	DCUN1D3
ENSG00000109184.10	ENSG00000109184	DCUN1D4
ENSG00000077279.12	ENSG00000077279	DCX
ENSG00000169738.3	ENSG00000169738	DCXR
ENSG00000153904.14	ENSG00000153904	DDAH1
ENSG00000213722.4	ENSG00000213722	DDAH2
ENSG00000167986.9	ENSG00000167986	DDB1
ENSG00000134574.7	ENSG00000134574	DDB2
ENSG00000100523.10	ENSG00000100523	DDHD1
ENSG00000085788.9	ENSG00000085788	DDHD2
ENSG00000197312.7	ENSG00000197312	DDI2
ENSG00000165490.8	ENSG00000165490	DDIAS
ENSG00000175197.6	ENSG00000175197	DDIT3
ENSG00000244038.5	ENSG00000244038	DDOST
ENSG00000204580.7	ENSG00000204580	DDR1
ENSG00000079785.10	ENSG00000079785	DDX1
ENSG00000178105.5	ENSG00000178105	DDX10
ENSG00000013573.12	ENSG00000013573	DDX11
ENSG00000100201.14	ENSG00000100201	DDX17
ENSG00000088205.8	ENSG00000088205	DDX18
ENSG00000168872.11	ENSG00000168872	DDX19A
ENSG00000157349.11	ENSG00000157349	DDX19B
ENSG00000064703.7	ENSG00000064703	DDX20
ENSG00000165732.8	ENSG00000165732	DDX21
ENSG00000174243.5	ENSG00000174243	DDX23
ENSG00000089737.11	ENSG00000089737	DDX24
ENSG00000182810.5	ENSG00000182810	DDX28
ENSG00000123136.10	ENSG00000123136	DDX39A
ENSG00000198563.9	ENSG00000198563	DDX39B
ENSG00000215301.5	ENSG00000215301	DDX3X
ENSG00000183258.7	ENSG00000183258	DDX41
ENSG00000198231.8	ENSG00000198231	DDX42
ENSG00000145833.11	ENSG00000145833	DDX46
ENSG00000213782.3	ENSG00000213782	DDX47
ENSG00000105671.7	ENSG00000105671	DDX49
ENSG00000108654.7	ENSG00000108654	DDX5
ENSG00000107625.8	ENSG00000107625	DDX50
ENSG00000111364.11	ENSG00000111364	DDX55
ENSG00000136271.6	ENSG00000136271	DDX56
ENSG00000107201.5	ENSG00000107201	DDX58
ENSG00000110367.7	ENSG00000110367	DDX6
ENSG00000177030.12	ENSG00000177030	DEAF1
ENSG00000104325.2	ENSG00000104325	DECR1
ENSG00000158796.12	ENSG00000158796	DEDD
ENSG00000140995.12	ENSG00000140995	DEF8
ENSG00000143753.8	ENSG00000143753	DEGS1
ENSG00000124795.10	ENSG00000124795	DEK
ENSG00000119522.11	ENSG00000119522	DENND1A
ENSG00000174485.10	ENSG00000174485	DENND4A
ENSG00000198837.5	ENSG00000198837	DENND4B
ENSG00000137145.16	ENSG00000137145	DENND4C
ENSG00000184014.3	ENSG00000184014	DENND5A
ENSG00000170456.10	ENSG00000170456	DENND5B
ENSG00000139726.6	ENSG00000139726	DENR
ENSG00000024526.12	ENSG00000024526	DEPDC1
ENSG00000035499.8	ENSG00000035499	DEPDC1B
ENSG00000121690.5	ENSG00000121690	DEPDC7
ENSG00000023697.8	ENSG00000023697	DERA
ENSG00000136986.5	ENSG00000136986	DERL1
ENSG00000072849.6	ENSG00000072849	DERL2
ENSG00000121644.14	ENSG00000121644	DESI2
ENSG00000140543.9	ENSG00000140543	DET1
ENSG00000160049.7	ENSG00000160049	DFFA
ENSG00000105928.9	ENSG00000105928	DFNA5
ENSG00000128185.5	ENSG00000128185	DGCR6L
ENSG00000128191.9	ENSG00000128191	DGCR8
ENSG00000136267.9	ENSG00000136267	DGKB
ENSG00000077044.5	ENSG00000077044	DGKD
ENSG00000102780.12	ENSG00000102780	DGKH
ENSG00000133943.16	ENSG00000133943	DGLUCY
ENSG00000114956.15	ENSG00000114956	DGUOK
ENSG00000116133.7	ENSG00000116133	DHCR24
ENSG00000172893.11	ENSG00000172893	DHCR7
ENSG00000117682.12	ENSG00000117682	DHDDS
ENSG00000228716.2	ENSG00000228716	DHFR
ENSG00000095059.11	ENSG00000095059	DHPS
ENSG00000157379.9	ENSG00000157379	DHRS1
ENSG00000162496.4	ENSG00000162496	DHRS3
ENSG00000215256.3	ENSG00000215256	DHRS4-AS1
ENSG00000100612.9	ENSG00000100612	DHRS7
ENSG00000109016.13	ENSG00000109016	DHRS7B
ENSG00000181192.7	ENSG00000181192	DHTKD1
ENSG00000109606.8	ENSG00000109606	DHX15
ENSG00000204560.5	ENSG00000204560	DHX16
ENSG00000067248.5	ENSG00000067248	DHX29
ENSG00000132153.10	ENSG00000132153	DHX30
ENSG00000089876.7	ENSG00000089876	DHX32
ENSG00000005100.8	ENSG00000005100	DHX33
ENSG00000101452.10	ENSG00000101452	DHX35
ENSG00000174953.9	ENSG00000174953	DHX36
ENSG00000108406.5	ENSG00000108406	DHX40
ENSG00000067596.6	ENSG00000067596	DHX8
ENSG00000135829.12	ENSG00000135829	DHX9
ENSG00000184047.11	ENSG00000184047	DIABLO
ENSG00000131504.11	ENSG00000131504	DIAPH1
ENSG00000147202.13	ENSG00000147202	DIAPH2
ENSG00000139734.13	ENSG00000139734	DIAPH3
ENSG00000100697.10	ENSG00000100697	DICER1
ENSG00000235706.3	ENSG00000235706	DICER1-AS1
ENSG00000101191.12	ENSG00000101191	DIDO1
ENSG00000117597.13	ENSG00000117597	DIEXF
ENSG00000086189.5	ENSG00000086189	DIMT1
ENSG00000066084.8	ENSG00000066084	DIP2B
ENSG00000151240.11	ENSG00000151240	DIP2C
ENSG00000162595.4	ENSG00000162595	DIRAS3
ENSG00000138463.8	ENSG00000138463	DIRC2
ENSG00000231672.2	ENSG00000231672	DIRC3
ENSG00000083520.10	ENSG00000083520	DIS3
ENSG00000166938.8	ENSG00000166938	DIS3L
ENSG00000144535.15	ENSG00000144535	DIS3L2
ENSG00000150764.9	ENSG00000150764	DIXDC1
ENSG00000130826.11	ENSG00000130826	DKC1
ENSG00000050165.13	ENSG00000050165	DKK3
ENSG00000150768.11	ENSG00000150768	DLAT
ENSG00000091140.8	ENSG00000091140	DLD
ENSG00000176124.7	ENSG00000176124	DLEU1
ENSG00000231607.4	ENSG00000231607	DLEU2
ENSG00000075711.16	ENSG00000075711	DLG1
ENSG00000082458.7	ENSG00000082458	DLG3
ENSG00000080845.13	ENSG00000080845	DLGAP4
ENSG00000126787.8	ENSG00000126787	DLGAP5
ENSG00000185559.9	ENSG00000185559	DLK1
ENSG00000198719.7	ENSG00000198719	DLL1
ENSG00000137038.7	ENSG00000137038	DMAC1
ENSG00000105341.14	ENSG00000105341	DMAC2
ENSG00000178028.9	ENSG00000178028	DMAP1
ENSG00000198947.10	ENSG00000198947	DMD
ENSG00000176399.3	ENSG00000176399	DMRTA1
ENSG00000135164.14	ENSG00000135164	DMTF1
ENSG00000104093.9	ENSG00000104093	DMXL2
ENSG00000138346.10	ENSG00000138346	DNA2
ENSG00000165506.10	ENSG00000165506	DNAAF2
ENSG00000164818.11	ENSG00000164818	DNAAF5
ENSG00000250091.2	ENSG00000250091	DNAH10OS
ENSG00000185842.10	ENSG00000185842	DNAH14
ENSG00000187775.12	ENSG00000187775	DNAH17
ENSG00000118997.9	ENSG00000118997	DNAH7
ENSG00000086061.11	ENSG00000086061	DNAJA1
ENSG00000069345.7	ENSG00000069345	DNAJA2
ENSG00000103423.9	ENSG00000103423	DNAJA3
ENSG00000132002.3	ENSG00000132002	DNAJB1
ENSG00000148719.10	ENSG00000148719	DNAJB12
ENSG00000164031.12	ENSG00000164031	DNAJB14
ENSG00000162616.8	ENSG00000162616	DNAJB4
ENSG00000137094.10	ENSG00000137094	DNAJB5
ENSG00000105993.10	ENSG00000105993	DNAJB6
ENSG00000128590.4	ENSG00000128590	DNAJB9
ENSG00000077232.12	ENSG00000077232	DNAJC10
ENSG00000138246.11	ENSG00000138246	DNAJC13
ENSG00000116138.8	ENSG00000116138	DNAJC16
ENSG00000170464.5	ENSG00000170464	DNAJC18
ENSG00000205981.2	ENSG00000205981	DNAJC19
ENSG00000105821.10	ENSG00000105821	DNAJC2
ENSG00000168724.10	ENSG00000168724	DNAJC21
ENSG00000170946.10	ENSG00000170946	DNAJC24
ENSG00000059769.15	ENSG00000059769	DNAJC25
ENSG00000102580.10	ENSG00000102580	DNAJC3
ENSG00000247400.3	ENSG00000247400	DNAJC3-AS1
ENSG00000101152.6	ENSG00000101152	DNAJC5
ENSG00000168259.10	ENSG00000168259	DNAJC7
ENSG00000126698.6	ENSG00000126698	DNAJC8
ENSG00000213551.4	ENSG00000213551	DNAJC9
ENSG00000163879.9	ENSG00000163879	DNALI1
ENSG00000213918.6	ENSG00000213918	DNASE1
ENSG00000187957.7	ENSG00000187957	DNER
ENSG00000179532.8	ENSG00000179532	DNHD1
ENSG00000087470.13	ENSG00000087470	DNM1L
ENSG00000107554.11	ENSG00000107554	DNMBP
ENSG00000130816.10	ENSG00000130816	DNMT1
ENSG00000119772.12	ENSG00000119772	DNMT3A
ENSG00000088305.14	ENSG00000088305	DNMT3B
ENSG00000123992.14	ENSG00000123992	DNPEP
ENSG00000101457.8	ENSG00000101457	DNTTIP1
ENSG00000067334.9	ENSG00000067334	DNTTIP2
ENSG00000150760.8	ENSG00000150760	DOCK1
ENSG00000147251.11	ENSG00000147251	DOCK11
ENSG00000128512.15	ENSG00000128512	DOCK4
ENSG00000147459.13	ENSG00000147459	DOCK5
ENSG00000116641.11	ENSG00000116641	DOCK7
ENSG00000101134.7	ENSG00000101134	DOK5
ENSG00000175283.7	ENSG00000175283	DOLK
ENSG00000083097.10	ENSG00000083097	DOPEY1
ENSG00000142197.8	ENSG00000142197	DOPEY2
ENSG00000172269.12	ENSG00000172269	DPAGT1
ENSG00000166171.8	ENSG00000166171	DPCD
ENSG00000133884.5	ENSG00000133884	DPF2
ENSG00000132768.9	ENSG00000132768	DPH2
ENSG00000154813.5	ENSG00000154813	DPH3
ENSG00000117543.15	ENSG00000117543	DPH5
ENSG00000134146.7	ENSG00000134146	DPH6
ENSG00000000419.8	ENSG00000000419	DPM1
ENSG00000136908.13	ENSG00000136908	DPM2
ENSG00000175497.12	ENSG00000175497	DPP10
ENSG00000254986.3	ENSG00000254986	DPP3
ENSG00000074603.14	ENSG00000074603	DPP8
ENSG00000121570.8	ENSG00000121570	DPPA4
ENSG00000173852.9	ENSG00000173852	DPY19L1
ENSG00000178904.14	ENSG00000178904	DPY19L3
ENSG00000156162.12	ENSG00000156162	DPY19L4
ENSG00000162961.9	ENSG00000162961	DPY30
ENSG00000092964.12	ENSG00000092964	DPYSL2
ENSG00000113657.8	ENSG00000113657	DPYSL3
ENSG00000151640.8	ENSG00000151640	DPYSL4
ENSG00000157851.12	ENSG00000157851	DPYSL5
ENSG00000117505.8	ENSG00000117505	DR1
ENSG00000136048.9	ENSG00000136048	DRAM1
ENSG00000156171.10	ENSG00000156171	DRAM2
ENSG00000162490.6	ENSG00000162490	DRAXIN
ENSG00000171962.13	ENSG00000171962	DRC3
ENSG00000185721.7	ENSG00000185721	DRG1
ENSG00000108591.5	ENSG00000108591	DRG2
ENSG00000113360.12	ENSG00000113360	DROSHA
ENSG00000134755.10	ENSG00000134755	DSC2
ENSG00000157538.9	ENSG00000157538	DSCR3
ENSG00000111817.12	ENSG00000111817	DSE
ENSG00000046604.8	ENSG00000046604	DSG2
ENSG00000134757.4	ENSG00000134757	DSG3
ENSG00000149636.11	ENSG00000149636	DSN1
ENSG00000096696.9	ENSG00000096696	DSP
ENSG00000151914.13	ENSG00000151914	DST
ENSG00000125868.11	ENSG00000125868	DSTN
ENSG00000133059.12	ENSG00000133059	DSTYK
ENSG00000125821.7	ENSG00000125821	DTD1
ENSG00000129480.8	ENSG00000129480	DTD2
ENSG00000143476.13	ENSG00000143476	DTL
ENSG00000104047.10	ENSG00000104047	DTWD1
ENSG00000110042.3	ENSG00000110042	DTX4
ENSG00000168393.8	ENSG00000168393	DTYMK
ENSG00000243701.1	ENSG00000243701	DUBR
ENSG00000140279.8	ENSG00000140279	DUOX2
ENSG00000169718.13	ENSG00000169718	DUS1L
ENSG00000167264.13	ENSG00000167264	DUS2
ENSG00000105865.6	ENSG00000105865	DUS4L
ENSG00000120129.5	ENSG00000120129	DUSP1
ENSG00000143507.13	ENSG00000143507	DUSP10
ENSG00000144048.6	ENSG00000144048	DUSP11
ENSG00000081721.7	ENSG00000081721	DUSP12
ENSG00000111266.4	ENSG00000111266	DUSP16
ENSG00000162999.8	ENSG00000162999	DUSP19
ENSG00000112679.10	ENSG00000112679	DUSP22
ENSG00000108861.4	ENSG00000108861	DUSP3
ENSG00000139318.7	ENSG00000139318	DUSP6
ENSG00000164086.8	ENSG00000164086	DUSP7
ENSG00000161202.13	ENSG00000161202	DVL3
ENSG00000204348.5	ENSG00000204348	DXO
ENSG00000141627.9	ENSG00000141627	DYM
ENSG00000197102.6	ENSG00000197102	DYNC1H1
ENSG00000077380.11	ENSG00000077380	DYNC1I2
ENSG00000144635.4	ENSG00000144635	DYNC1LI1
ENSG00000135720.8	ENSG00000135720	DYNC1LI2
ENSG00000187240.9	ENSG00000187240	DYNC2H1
ENSG00000138036.14	ENSG00000138036	DYNC2LI1
ENSG00000088986.6	ENSG00000088986	DYNLL1
ENSG00000264364.2	ENSG00000264364	DYNLL2
ENSG00000125971.12	ENSG00000125971	DYNLRB1
ENSG00000146425.6	ENSG00000146425	DYNLT1
ENSG00000165169.6	ENSG00000165169	DYNLT3
ENSG00000157540.15	ENSG00000157540	DYRK1A
ENSG00000127334.10	ENSG00000127334	DYRK2
ENSG00000010219.9	ENSG00000010219	DYRK4
ENSG00000089091.12	ENSG00000089091	DZANK1
ENSG00000134874.13	ENSG00000134874	DZIP1
ENSG00000158163.10	ENSG00000158163	DZIP1L
ENSG00000198919.8	ENSG00000198919	DZIP3
ENSG00000007968.6	ENSG00000007968	E2F2
ENSG00000112242.10	ENSG00000112242	E2F3
ENSG00000205250.4	ENSG00000205250	E2F4
ENSG00000133740.6	ENSG00000133740	E2F5
ENSG00000169016.12	ENSG00000169016	E2F6
ENSG00000165891.11	ENSG00000165891	E2F7
ENSG00000129173.8	ENSG00000129173	E2F8
ENSG00000144597.9	ENSG00000144597	EAF1
ENSG00000145088.4	ENSG00000145088	EAF2
ENSG00000129518.4	ENSG00000129518	EAPP
ENSG00000103356.11	ENSG00000103356	EARS2
ENSG00000147654.10	ENSG00000147654	EBAG9
ENSG00000164330.12	ENSG00000164330	EBF1
ENSG00000221818.4	ENSG00000221818	EBF2
ENSG00000108001.9	ENSG00000108001	EBF3
ENSG00000255423.1	ENSG00000255423	EBLN2
ENSG00000117395.6	ENSG00000117395	EBNA1BP2
ENSG00000147155.6	ENSG00000147155	EBP
ENSG00000123179.9	ENSG00000123179	EBPL
ENSG00000122882.6	ENSG00000122882	ECD
ENSG00000145194.13	ENSG00000145194	ECE2
ENSG00000104823.4	ENSG00000104823	ECH1
ENSG00000093144.14	ENSG00000093144	ECHDC1
ENSG00000127884.4	ENSG00000127884	ECHS1
ENSG00000198721.8	ENSG00000198721	ECI2
ENSG00000130159.9	ENSG00000130159	ECSIT
ENSG00000114346.9	ENSG00000114346	ECT2
ENSG00000131080.10	ENSG00000131080	EDA2R
ENSG00000179151.7	ENSG00000179151	EDC3
ENSG00000134109.6	ENSG00000134109	EDEM1
ENSG00000088298.8	ENSG00000088298	EDEM2
ENSG00000116406.14	ENSG00000116406	EDEM3
ENSG00000107223.8	ENSG00000107223	EDF1
ENSG00000136160.10	ENSG00000136160	EDNRB
ENSG00000107938.13	ENSG00000107938	EDRF1
ENSG00000236991.2	ENSG00000236991	EDRF1-AS1
ENSG00000102189.12	ENSG00000102189	EEA1
ENSG00000074266.13	ENSG00000074266	EED
ENSG00000156508.13	ENSG00000156508	EEF1A1
ENSG00000228502.1	ENSG00000228502	EEF1A1P11
ENSG00000214199.3	ENSG00000214199	EEF1A1P12
ENSG00000250182.2	ENSG00000250182	EEF1A1P13
ENSG00000249855.1	ENSG00000249855	EEF1A1P19
ENSG00000232587.1	ENSG00000232587	EEF1A1P3
ENSG00000245205.3	ENSG00000245205	EEF1A1P4
ENSG00000196205.7	ENSG00000196205	EEF1A1P5
ENSG00000233476.2	ENSG00000233476	EEF1A1P6
ENSG00000150456.6	ENSG00000150456	EEF1AKMT1
ENSG00000203791.9	ENSG00000203791	EEF1AKMT2
ENSG00000123427.11	ENSG00000123427	EEF1AKMT3
ENSG00000114942.9	ENSG00000114942	EEF1B2
ENSG00000232472.1	ENSG00000232472	EEF1B2P3
ENSG00000213261.3	ENSG00000213261	EEF1B2P6
ENSG00000104529.13	ENSG00000104529	EEF1D
ENSG00000124802.7	ENSG00000124802	EEF1E1
ENSG00000167658.11	ENSG00000167658	EEF2
ENSG00000118894.10	ENSG00000118894	EEF2KMT
ENSG00000159658.6	ENSG00000159658	EFCAB14
ENSG00000203666.8	ENSG00000203666	EFCAB2
ENSG00000203965.8	ENSG00000203965	EFCAB7
ENSG00000115380.14	ENSG00000115380	EFEMP1
ENSG00000096093.10	ENSG00000096093	EFHC1
ENSG00000140598.9	ENSG00000140598	EFL1
ENSG00000243364.3	ENSG00000243364	EFNA4
ENSG00000184349.8	ENSG00000184349	EFNA5
ENSG00000125266.6	ENSG00000125266	EFNB2
ENSG00000108947.4	ENSG00000108947	EFNB3
ENSG00000132294.9	ENSG00000132294	EFR3A
ENSG00000100842.8	ENSG00000100842	EFS
ENSG00000108883.8	ENSG00000108883	EFTUD2
ENSG00000138798.7	ENSG00000138798	EGF
ENSG00000206120.7	ENSG00000206120	EGFEM1P
ENSG00000146648.11	ENSG00000146648	EGFR
ENSG00000135766.8	ENSG00000135766	EGLN1
[truncated: 6,959 more rows]

## Sheet: Table_S3
3986 genes
gencode_id	ensembl_gene_id	Lastest version of gene symbol (from HGNC database)
ENSG00000145495.10	ENSG00000145495	MARCH6
ENSG00000125354.18	ENSG00000125354	SEPT6
ENSG00000122545.13	ENSG00000122545	SEPT7
ENSG00000184640.13	ENSG00000184640	SEPT9
ENSG00000138758.7	ENSG00000138758	SEPT11
ENSG00000158122.7	ENSG00000158122	AAED1
ENSG00000127837.5	ENSG00000127837	AAMP
ENSG00000131043.7	ENSG00000131043	AAR2
ENSG00000157426.9	ENSG00000157426	AASDH
ENSG00000008311.10	ENSG00000008311	AASS
ENSG00000183044.7	ENSG00000183044	ABAT
ENSG00000135776.4	ENSG00000135776	ABCB10
ENSG00000069431.6	ENSG00000069431	ABCC9
ENSG00000164163.6	ENSG00000164163	ABCE1
ENSG00000033050.3	ENSG00000033050	ABCF2
ENSG00000139826.5	ENSG00000139826	ABHD13
ENSG00000100439.6	ENSG00000100439	ABHD4
ENSG00000138443.11	ENSG00000138443	ABI2
ENSG00000146386.7	ENSG00000146386	ABRACL
ENSG00000165660.7	ENSG00000165660	ABRAXAS2
ENSG00000146109.3	ENSG00000146109	ABT1
ENSG00000114331.8	ENSG00000114331	ACAP2
ENSG00000107897.14	ENSG00000107897	ACBD5
ENSG00000144476.5	ENSG00000144476	ACKR3
ENSG00000131473.12	ENSG00000131473	ACLY
ENSG00000100412.11	ENSG00000100412	ACO2
ENSG00000097021.15	ENSG00000097021	ACOT7
ENSG00000161533.7	ENSG00000161533	ACOX1
ENSG00000143727.11	ENSG00000143727	ACP1
ENSG00000123983.9	ENSG00000123983	ACSL3
ENSG00000068366.15	ENSG00000068366	ACSL4
ENSG00000164398.8	ENSG00000164398	ACSL6
ENSG00000075624.9	ENSG00000075624	ACTB
ENSG00000184009.5	ENSG00000184009	ACTG1
ENSG00000136518.12	ENSG00000136518	ACTL6A
ENSG00000138071.9	ENSG00000138071	ACTR2
ENSG00000115170.9	ENSG00000115170	ACVR1
ENSG00000121989.10	ENSG00000121989	ACVR2A
ENSG00000114739.9	ENSG00000114739	ACVR2B
ENSG00000093072.11	ENSG00000093072	ADA2
ENSG00000137845.10	ENSG00000137845	ADAM10
ENSG00000135074.11	ENSG00000135074	ADAM19
ENSG00000229186.3	ENSG00000229186	ADAM1A
ENSG00000173157.12	ENSG00000173157	ADAMTS20
ENSG00000049192.10	ENSG00000049192	ADAMTS6
ENSG00000156218.8	ENSG00000156218	ADAMTSL3
ENSG00000189007.11	ENSG00000189007	ADAT2
ENSG00000078549.10	ENSG00000078549	ADCYAP1R1
ENSG00000075340.18	ENSG00000075340	ADD2
ENSG00000148700.9	ENSG00000148700	ADD3
ENSG00000152990.9	ENSG00000152990	ADGRA3
ENSG00000135298.9	ENSG00000135298	ADGRB3
ENSG00000205336.7	ENSG00000205336	ADGRG1
ENSG00000117114.15	ENSG00000117114	ADGRL2
ENSG00000150471.11	ENSG00000150471	ADGRL3
ENSG00000164199.11	ENSG00000164199	ADGRV1
ENSG00000156110.9	ENSG00000156110	ADK
ENSG00000101126.11	ENSG00000101126	ADNP
ENSG00000116863.10	ENSG00000116863	ADPRHL2
ENSG00000130706.8	ENSG00000130706	ADRM1
ENSG00000239900.7	ENSG00000239900	ADSL
ENSG00000139154.10	ENSG00000139154	AEBP2
ENSG00000130396.16	ENSG00000130396	AFDN
ENSG00000172493.16	ENSG00000172493	AFF1
ENSG00000072364.8	ENSG00000072364	AFF4
ENSG00000183077.11	ENSG00000183077	AFMID
ENSG00000084693.11	ENSG00000084693	AGBL5
ENSG00000164252.8	ENSG00000164252	AGGF1
ENSG00000092847.6	ENSG00000092847	AGO1
ENSG00000126070.14	ENSG00000126070	AGO3
ENSG00000134698.10	ENSG00000134698	AGO4
ENSG00000177674.11	ENSG00000177674	AGTRAP
ENSG00000101444.8	ENSG00000101444	AHCY
ENSG00000135541.16	ENSG00000135541	AHI1
ENSG00000124942.9	ENSG00000124942	AHNAK
ENSG00000100591.3	ENSG00000100591	AHSA1
ENSG00000173209.18	ENSG00000173209	AHSA2
ENSG00000186063.8	ENSG00000186063	AIDA
ENSG00000126878.8	ENSG00000126878	AIF1L
ENSG00000164022.12	ENSG00000164022	AIMP1
ENSG00000106305.5	ENSG00000106305	AIMP2
ENSG00000129474.11	ENSG00000129474	AJUBA
ENSG00000162433.10	ENSG00000162433	AK4
ENSG00000085231.9	ENSG00000085231	AK6
ENSG00000155085.11	ENSG00000155085	AK9
ENSG00000023516.7	ENSG00000023516	AKAP11
ENSG00000131016.12	ENSG00000131016	AKAP12
ENSG00000151320.6	ENSG00000151320	AKAP6
ENSG00000127914.12	ENSG00000127914	AKAP9
ENSG00000187134.8	ENSG00000187134	AKR1C1
ENSG00000117020.12	ENSG00000117020	AKT3
ENSG00000161618.5	ENSG00000161618	ALDH16A1
ENSG00000059573.4	ENSG00000059573	ALDH18A1
ENSG00000137124.6	ENSG00000137124	ALDH1B1
ENSG00000136010.9	ENSG00000136010	ALDH1L2
ENSG00000111275.8	ENSG00000111275	ALDH2
ENSG00000143149.8	ENSG00000143149	ALDH9A1
ENSG00000149925.12	ENSG00000149925	ALDOA
ENSG00000109107.9	ENSG00000109107	ALDOC
ENSG00000101901.6	ENSG00000101901	ALG13
ENSG00000086848.10	ENSG00000086848	ALG9
ENSG00000100601.5	ENSG00000100601	ALKBH1
ENSG00000166199.8	ENSG00000166199	ALKBH3
ENSG00000116127.13	ENSG00000116127	ALMS1
ENSG00000230002.2	ENSG00000230002	ALMS1-IT1
ENSG00000162551.9	ENSG00000162551	ALPL
ENSG00000183684.6	ENSG00000183684	ALYREF
ENSG00000165566.11	ENSG00000165566	AMER2
ENSG00000144233.5	ENSG00000144233	AMMECR1L
ENSG00000151743.6	ENSG00000151743	AMN1
ENSG00000126016.9	ENSG00000126016	AMOT
ENSG00000114019.10	ENSG00000114019	AMOTL2
ENSG00000078053.12	ENSG00000078053	AMPH
ENSG00000196510.8	ENSG00000196510	ANAPC7
ENSG00000214274.5	ENSG00000214274	ANG
ENSG00000145362.12	ENSG00000145362	ANK2
ENSG00000151150.16	ENSG00000151150	ANK3
ENSG00000001629.5	ENSG00000001629	ANKIB1
ENSG00000088448.10	ENSG00000088448	ANKRD10
ENSG00000101745.11	ENSG00000101745	ANKRD12
ENSG00000107890.12	ENSG00000107890	ANKRD26
ENSG00000206560.6	ENSG00000206560	ANKRD28
ENSG00000135976.12	ENSG00000135976	ANKRD36
ENSG00000196912.8	ENSG00000196912	ANKRD36B
ENSG00000174501.10	ENSG00000174501	ANKRD36C
ENSG00000154945.6	ENSG00000154945	ANKRD40
ENSG00000151458.7	ENSG00000151458	ANKRD50
ENSG00000135299.12	ENSG00000135299	ANKRD6
ENSG00000064999.12	ENSG00000064999	ANKS1A
ENSG00000163516.9	ENSG00000163516	ANKZF1
ENSG00000011201.6	ENSG00000011201	ANOS1
ENSG00000136938.8	ENSG00000136938	ANP32B
ENSG00000143401.10	ENSG00000143401	ANP32E
ENSG00000169604.15	ENSG00000169604	ANTXR1
ENSG00000182718.12	ENSG00000182718	ANXA2
ENSG00000166747.8	ENSG00000166747	AP1G1
ENSG00000182287.9	ENSG00000182287	AP1S2
ENSG00000006125.12	ENSG00000006125	AP2B1
ENSG00000042753.7	ENSG00000042753	AP2S1
ENSG00000053770.7	ENSG00000053770	AP5M1
ENSG00000169188.4	ENSG00000169188	APEX2
ENSG00000117362.8	ENSG00000117362	APH1A
ENSG00000105290.7	ENSG00000105290	APLP1
ENSG00000084234.12	ENSG00000084234	APLP2
ENSG00000124701.5	ENSG00000124701	APOBEC2
ENSG00000244509.3	ENSG00000244509	APOBEC3C
ENSG00000256053.3	ENSG00000256053	APOPT1
ENSG00000142192.16	ENSG00000142192	APP
ENSG00000198931.6	ENSG00000198931	APRT
ENSG00000168374.6	ENSG00000168374	ARF4
ENSG00000004059.6	ENSG00000004059	ARF5
ENSG00000165527.5	ENSG00000165527	ARF6
ENSG00000066777.4	ENSG00000066777	ARFGEF1
ENSG00000112379.8	ENSG00000112379	ARFGEF3
ENSG00000175220.7	ENSG00000175220	ARHGAP1
ENSG00000198826.6	ENSG00000198826	ARHGAP11A
ENSG00000165322.13	ENSG00000165322	ARHGAP12
ENSG00000213390.6	ENSG00000213390	ARHGAP19
ENSG00000107863.12	ENSG00000107863	ARHGAP21
ENSG00000134909.14	ENSG00000134909	ARHGAP32
ENSG00000100852.8	ENSG00000100852	ARHGAP5
ENSG00000104728.11	ENSG00000104728	ARHGEF10
ENSG00000196914.4	ENSG00000196914	ARHGEF12
ENSG00000102606.13	ENSG00000102606	ARHGEF7
ENSG00000117713.13	ENSG00000117713	ARID1A
ENSG00000049618.17	ENSG00000049618	ARID1B
ENSG00000189079.11	ENSG00000189079	ARID2
ENSG00000116017.6	ENSG00000116017	ARID3A
ENSG00000032219.14	ENSG00000032219	ARID4A
ENSG00000054267.16	ENSG00000054267	ARID4B
ENSG00000150347.10	ENSG00000150347	ARID5B
ENSG00000152219.4	ENSG00000152219	ARL14EP
ENSG00000214087.4	ENSG00000214087	ARL16
ENSG00000213465.3	ENSG00000213465	ARL2
ENSG00000102931.3	ENSG00000102931	ARL2BP
ENSG00000138175.8	ENSG00000138175	ARL3
ENSG00000122644.8	ENSG00000122644	ARL4A
ENSG00000248780.1	ENSG00000248780	ARL4AP2
ENSG00000218996.1	ENSG00000218996	ARL4AP5
ENSG00000188042.5	ENSG00000188042	ARL4C
ENSG00000170540.10	ENSG00000170540	ARL6IP1
ENSG00000144746.6	ENSG00000144746	ARL6IP5
ENSG00000118690.8	ENSG00000118690	ARMC2
ENSG00000105676.9	ENSG00000105676	ARMC6
ENSG00000114098.13	ENSG00000114098	ARMC8
ENSG00000184867.9	ENSG00000184867	ARMCX2
ENSG00000146476.6	ENSG00000146476	ARMT1
ENSG00000143437.16	ENSG00000143437	ARNT
ENSG00000241685.4	ENSG00000241685	ARPC1A
ENSG00000130429.8	ENSG00000130429	ARPC1B
ENSG00000111229.11	ENSG00000111229	ARPC3
ENSG00000241553.8	ENSG00000241553	ARPC4
ENSG00000136950.9	ENSG00000136950	ARPC5L
ENSG00000128989.6	ENSG00000128989	ARPP19
ENSG00000113369.4	ENSG00000113369	ARRDC3
ENSG00000140450.7	ENSG00000140450	ARRDC4
ENSG00000113273.11	ENSG00000113273	ARSB
ENSG00000267080.1	ENSG00000267080	ASB16-AS1
ENSG00000182177.9	ENSG00000182177	ASB18
ENSG00000115239.17	ENSG00000115239	ASB3
ENSG00000177981.6	ENSG00000177981	ASB8
ENSG00000112249.9	ENSG00000112249	ASCC3
ENSG00000139352.3	ENSG00000139352	ASCL1
ENSG00000111875.7	ENSG00000111875	ASF1A
ENSG00000105011.4	ENSG00000105011	ASF1B
ENSG00000116539.6	ENSG00000116539	ASH1L
ENSG00000169093.10	ENSG00000169093	ASMTL
ENSG00000198356.7	ENSG00000198356	ASNA1
ENSG00000070669.12	ENSG00000070669	ASNS
ENSG00000066279.12	ENSG00000066279	ASPM
ENSG00000130707.13	ENSG00000130707	ASS1
ENSG00000148219.12	ENSG00000148219	ASTN2
ENSG00000141431.5	ENSG00000141431	ASXL3
ENSG00000138138.9	ENSG00000138138	ATAD1
ENSG00000156802.8	ENSG00000156802	ATAD2
ENSG00000119778.10	ENSG00000119778	ATAD2B
ENSG00000107669.13	ENSG00000107669	ATE1
ENSG00000115966.12	ENSG00000115966	ATF2
ENSG00000118217.5	ENSG00000118217	ATF6
ENSG00000171681.8	ENSG00000171681	ATF7IP
ENSG00000057663.8	ENSG00000057663	ATG5
ENSG00000181652.14	ENSG00000181652	ATG9B
ENSG00000149311.13	ENSG00000149311	ATM
ENSG00000133657.10	ENSG00000133657	ATP13A3
ENSG00000018625.10	ENSG00000018625	ATP1A2
ENSG00000143153.8	ENSG00000143153	ATP1B1
ENSG00000129244.4	ENSG00000129244	ATP1B2
ENSG00000069849.6	ENSG00000069849	ATP1B3
ENSG00000070961.10	ENSG00000070961	ATP2B1
ENSG00000058668.10	ENSG00000058668	ATP2B4
ENSG00000110955.4	ENSG00000110955	ATP5B
ENSG00000124172.5	ENSG00000124172	ATP5E
ENSG00000159199.9	ENSG00000159199	ATP5G1
ENSG00000135390.13	ENSG00000135390	ATP5G2
ENSG00000154723.8	ENSG00000154723	ATP5J
ENSG00000241468.3	ENSG00000241468	ATP5J2
ENSG00000167283.3	ENSG00000167283	ATP5L
ENSG00000241837.2	ENSG00000241837	ATP5O
ENSG00000182220.9	ENSG00000182220	ATP6AP2
ENSG00000117410.9	ENSG00000117410	ATP6V0B
ENSG00000159720.7	ENSG00000159720	ATP6V0D1
ENSG00000114573.5	ENSG00000114573	ATP6V1A
ENSG00000131100.8	ENSG00000131100	ATP6V1E1
ENSG00000128524.4	ENSG00000128524	ATP6V1F
ENSG00000136888.6	ENSG00000136888	ATP6V1G1
ENSG00000213760.6	ENSG00000213760	ATP6V1G2
ENSG00000165240.13	ENSG00000165240	ATP7A
ENSG00000124406.12	ENSG00000124406	ATP8A1
ENSG00000054793.9	ENSG00000054793	ATP9A
ENSG00000166377.15	ENSG00000166377	ATP9B
ENSG00000085224.16	ENSG00000085224	ATRX
ENSG00000130638.11	ENSG00000130638	ATXN10
ENSG00000204842.10	ENSG00000204842	ATXN2
ENSG00000066427.17	ENSG00000066427	ATXN3
ENSG00000162650.11	ENSG00000162650	ATXN7L2
ENSG00000253719.2	ENSG00000253719	ATXN7L3B
ENSG00000127423.6	ENSG00000127423	AUNIP
ENSG00000115307.12	ENSG00000115307	AUP1
ENSG00000175756.9	ENSG00000175756	AURKAIP1
ENSG00000178999.8	ENSG00000178999	AURKB
ENSG00000168646.8	ENSG00000168646	AXIN2
ENSG00000167601.7	ENSG00000167601	AXL
ENSG00000166710.13	ENSG00000166710	B2M
ENSG00000172318.4	ENSG00000172318	B3GALT1
ENSG00000187676.7	ENSG00000187676	B3GLCT
ENSG00000176597.7	ENSG00000176597	B3GNT5
ENSG00000086062.8	ENSG00000086062	B4GALT1
ENSG00000158470.5	ENSG00000158470	B4GALT5
ENSG00000123810.3	ENSG00000123810	B9D2
ENSG00000156735.6	ENSG00000156735	BAG4
ENSG00000198604.6	ENSG00000198604	BAZ1A
ENSG00000009954.6	ENSG00000009954	BAZ1B
ENSG00000076108.7	ENSG00000076108	BAZ2A
ENSG00000123636.13	ENSG00000123636	BAZ2B
ENSG00000214413.3	ENSG00000214413	BBIP1
ENSG00000181004.5	ENSG00000181004	BBS12
ENSG00000140463.9	ENSG00000140463	BBS4
ENSG00000114439.14	ENSG00000114439	BBX
ENSG00000105552.10	ENSG00000105552	BCAT2
ENSG00000114200.5	ENSG00000114200	BCHE
ENSG00000103507.9	ENSG00000103507	BCKDK
ENSG00000142867.8	ENSG00000142867	BCL10
ENSG00000119866.16	ENSG00000119866	BCL11A
ENSG00000171791.10	ENSG00000171791	BCL2
ENSG00000153094.17	ENSG00000153094	BCL2L11
ENSG00000106635.3	ENSG00000106635	BCL7B
ENSG00000183337.12	ENSG00000183337	BCOR
ENSG00000186716.15	ENSG00000186716	BCR
ENSG00000133169.5	ENSG00000133169	BEX1
ENSG00000102409.9	ENSG00000102409	BEX4
ENSG00000103429.6	ENSG00000103429	BFAR
ENSG00000151746.9	ENSG00000151746	BICD1
ENSG00000089685.10	ENSG00000089685	BIRC5
ENSG00000115760.9	ENSG00000115760	BIRC6
ENSG00000166619.8	ENSG00000166619	BLCAP
ENSG00000197299.6	ENSG00000197299	BLM
ENSG00000135441.3	ENSG00000135441	BLOC1S1
ENSG00000189114.6	ENSG00000189114	BLOC1S3
ENSG00000104164.6	ENSG00000104164	BLOC1S6
ENSG00000138696.6	ENSG00000138696	BMPR1B
ENSG00000176171.7	ENSG00000176171	BNIP3
ENSG00000271524.1	ENSG00000271524	BNIP3P17
ENSG00000144857.10	ENSG00000144857	BOC
ENSG00000038219.8	ENSG00000038219	BOD1L1
ENSG00000163170.7	ENSG00000163170	BOLA3
ENSG00000172331.7	ENSG00000172331	BPGM
ENSG00000137274.8	ENSG00000137274	BPHL
ENSG00000171634.12	ENSG00000171634	BPTF
ENSG00000157764.8	ENSG00000157764	BRAF
ENSG00000012048.15	ENSG00000012048	BRCA1
ENSG00000139618.10	ENSG00000139618	BRCA2
ENSG00000185515.10	ENSG00000185515	BRCC3
ENSG00000204256.8	ENSG00000204256	BRD2
ENSG00000169925.12	ENSG00000169925	BRD3
ENSG00000112983.13	ENSG00000112983	BRD8
ENSG00000136492.4	ENSG00000136492	BRIP1
ENSG00000113460.8	ENSG00000113460	BRIX1
ENSG00000174744.9	ENSG00000174744	BRMS1
ENSG00000162819.7	ENSG00000162819	BROX
ENSG00000185658.9	ENSG00000185658	BRWD1
ENSG00000165288.10	ENSG00000165288	BRWD3
ENSG00000160058.14	ENSG00000160058	BSDC1
ENSG00000172270.14	ENSG00000172270	BSG
ENSG00000095564.9	ENSG00000095564	BTAF1
ENSG00000184887.9	ENSG00000184887	BTBD6
ENSG00000145741.11	ENSG00000145741	BTF3
ENSG00000134717.13	ENSG00000134717	BTF3L4
ENSG00000133639.3	ENSG00000133639	BTG1
ENSG00000154640.10	ENSG00000154640	BTG3
ENSG00000112763.11	ENSG00000112763	BTN2A1
ENSG00000124508.12	ENSG00000124508	BTN2A2
ENSG00000156970.8	ENSG00000156970	BUB1B
ENSG00000106245.5	ENSG00000106245	BUD31
ENSG00000082153.13	ENSG00000082153	BZW1
ENSG00000137720.3	ENSG00000137720	C11orf1
ENSG00000171067.6	ENSG00000171067	C11orf24
ENSG00000182919.10	ENSG00000182919	C11orf54
ENSG00000110696.5	ENSG00000110696	C11orf58
ENSG00000184224.3	ENSG00000184224	C11orf72
ENSG00000165805.5	ENSG00000165805	C12orf50
ENSG00000179933.4	ENSG00000179933	C14orf119
ENSG00000227051.4	ENSG00000227051	C14orf132
ENSG00000156411.5	ENSG00000156411	C14orf2
ENSG00000139971.11	ENSG00000139971	C14orf37
ENSG00000125319.10	ENSG00000125319	C17orf53
ENSG00000186665.8	ENSG00000186665	C17orf58
ENSG00000178927.12	ENSG00000178927	C17orf62
ENSG00000166845.9	ENSG00000166845	C18orf54
ENSG00000167747.9	ENSG00000167747	C19orf48
ENSG00000197223.7	ENSG00000197223	C1D
ENSG00000257818.1	ENSG00000257818	C1GALT1P1
ENSG00000116922.10	ENSG00000116922	C1orf109
ENSG00000143633.8	ENSG00000143633	C1orf131
ENSG00000198912.6	ENSG00000198912	C1orf174
ENSG00000119280.12	ENSG00000119280	C1orf198
ENSG00000116667.8	ENSG00000116667	C1orf21
ENSG00000162642.9	ENSG00000162642	C1orf52
ENSG00000125462.12	ENSG00000125462	C1orf61
ENSG00000082196.16	ENSG00000082196	C1QTNF3
ENSG00000088854.11	ENSG00000088854	C20orf194
ENSG00000171984.10	ENSG00000171984	C20orf196
ENSG00000160221.12	ENSG00000160221	C21orf33
ENSG00000160298.13	ENSG00000160298	C21orf58
ENSG00000154642.6	ENSG00000154642	C21orf91
ENSG00000184208.10	ENSG00000184208	C22orf46
ENSG00000168014.12	ENSG00000168014	C2CD3
ENSG00000111731.8	ENSG00000111731	C2CD5
ENSG00000115998.3	ENSG00000115998	C2orf42
ENSG00000178074.5	ENSG00000178074	C2orf69
ENSG00000114529.8	ENSG00000114529	C3orf52
ENSG00000187068.2	ENSG00000187068	C3orf70
ENSG00000164096.10	ENSG00000164096	C4orf3
ENSG00000163633.6	ENSG00000163633	C4orf36
ENSG00000205208.4	ENSG00000205208	C4orf46
ENSG00000181904.8	ENSG00000181904	C5orf24
ENSG00000197603.9	ENSG00000197603	C5orf42
ENSG00000203872.6	ENSG00000203872	C6orf163
ENSG00000112308.8	ENSG00000112308	C6orf62
ENSG00000122783.12	ENSG00000122783	C7orf49
ENSG00000147894.10	ENSG00000147894	C9orf72
ENSG00000118298.6	ENSG00000118298	CA14
ENSG00000104267.5	ENSG00000104267	CA2
ENSG00000167434.5	ENSG00000167434	CA4
ENSG00000169239.8	ENSG00000169239	CA5B
ENSG00000099991.12	ENSG00000099991	CABIN1
ENSG00000149679.7	ENSG00000149679	CABLES2
ENSG00000158966.9	ENSG00000158966	CACHD1
ENSG00000165995.14	ENSG00000165995	CACNB2
ENSG00000151893.10	ENSG00000151893	CACUL1
ENSG00000116161.13	ENSG00000116161	CACYBP
ENSG00000182985.12	ENSG00000182985	CADM1
ENSG00000163618.13	ENSG00000163618	CADPS
ENSG00000012822.11	ENSG00000012822	CALCOCO1
ENSG00000136436.10	ENSG00000136436	CALCOCO2
ENSG00000143933.12	ENSG00000143933	CALM2
ENSG00000179218.9	ENSG00000179218	CALR
ENSG00000128595.12	ENSG00000128595	CALU
ENSG00000145349.12	ENSG00000145349	CAMK2D
ENSG00000162545.5	ENSG00000162545	CAMK2N1
ENSG00000164615.3	ENSG00000164615	CAMLG
ENSG00000118200.10	ENSG00000118200	CAMSAP2
ENSG00000171735.14	ENSG00000171735	CAMTA1
ENSG00000127022.10	ENSG00000127022	CANX
ENSG00000162909.13	ENSG00000162909	CAPN2
ENSG00000149260.10	ENSG00000149260	CAPN5
ENSG00000110888.13	ENSG00000110888	CAPRIN2
ENSG00000116489.8	ENSG00000116489	CAPZA1
ENSG00000198898.8	ENSG00000198898	CAPZA2
ENSG00000105483.12	ENSG00000105483	CARD8
ENSG00000138380.13	ENSG00000138380	CARF
ENSG00000079691.15	ENSG00000079691	CARMIL1
ENSG00000204682.5	ENSG00000204682	CASC10
ENSG00000272168.1	ENSG00000272168	CASC15
ENSG00000108349.10	ENSG00000108349	CASC3
ENSG00000166734.14	ENSG00000166734	CASC4
ENSG00000127995.12	ENSG00000127995	CASD1
ENSG00000106144.15	ENSG00000106144	CASP2
ENSG00000110395.4	ENSG00000110395	CBL
ENSG00000114423.14	ENSG00000114423	CBLB
ENSG00000145439.7	ENSG00000145439	CBR4
ENSG00000172785.14	ENSG00000172785	CBWD1
ENSG00000136682.10	ENSG00000136682	CBWD2
ENSG00000196873.11	ENSG00000196873	CBWD3
ENSG00000147996.12	ENSG00000147996	CBWD5
ENSG00000215126.6	ENSG00000215126	CBWD6
ENSG00000173894.6	ENSG00000173894	CBX2
ENSG00000122565.14	ENSG00000122565	CBX3
ENSG00000094916.9	ENSG00000094916	CBX5
ENSG00000183741.7	ENSG00000183741	CBX6
ENSG00000060339.9	ENSG00000060339	CCAR1
ENSG00000164221.8	ENSG00000164221	CCDC112
ENSG00000136710.5	ENSG00000136710	CCDC115
ENSG00000159873.5	ENSG00000159873	CCDC117
ENSG00000151773.8	ENSG00000151773	CCDC122
ENSG00000128596.12	ENSG00000128596	CCDC136
ENSG00000163006.7	ENSG00000163006	CCDC138
ENSG00000175455.10	ENSG00000175455	CCDC14
ENSG00000203952.5	ENSG00000203952	CCDC160
ENSG00000197816.9	ENSG00000197816	CCDC180
ENSG00000165813.12	ENSG00000165813	CCDC186
ENSG00000223745.3	ENSG00000223745	CCDC18-AS1
ENSG00000152492.9	ENSG00000152492	CCDC50
ENSG00000160124.5	ENSG00000160124	CCDC58
ENSG00000180376.12	ENSG00000180376	CCDC66
ENSG00000091986.11	ENSG00000091986	CCDC80
ENSG00000149231.7	ENSG00000149231	CCDC82
ENSG00000110104.7	ENSG00000110104	CCDC86
ENSG00000115355.11	ENSG00000115355	CCDC88A
ENSG00000137500.5	ENSG00000137500	CCDC90B
ENSG00000134057.10	ENSG00000134057	CCNB1
ENSG00000112237.8	ENSG00000112237	CCNC
ENSG00000110092.3	ENSG00000110092	CCND1
ENSG00000118971.3	ENSG00000118971	CCND2
ENSG00000162063.8	ENSG00000162063	CCNF
ENSG00000113328.14	ENSG00000113328	CCNG1
ENSG00000138764.9	ENSG00000138764	CCNG2
ENSG00000118816.5	ENSG00000118816	CCNI
ENSG00000107443.11	ENSG00000107443	CCNJ
ENSG00000082258.8	ENSG00000082258	CCNT2
ENSG00000103540.12	ENSG00000103540	CCP110
ENSG00000107771.11	ENSG00000107771	CCSER2
ENSG00000150753.7	ENSG00000150753	CCT5
ENSG00000156261.8	ENSG00000156261	CCT8
ENSG00000122674.8	ENSG00000122674	CCZ1
ENSG00000091972.14	ENSG00000091972	CD200
ENSG00000167775.6	ENSG00000167775	CD320
ENSG00000117335.14	ENSG00000117335	CD46
ENSG00000116815.11	ENSG00000116815	CD58
ENSG00000019582.10	ENSG00000019582	CD74
ENSG00000085117.7	ENSG00000085117	CD82
ENSG00000002586.13	ENSG00000002586	CD99
ENSG00000130177.10	ENSG00000130177	CDC16
ENSG00000117399.9	ENSG00000117399	CDC20
ENSG00000164045.7	ENSG00000164045	CDC25A
ENSG00000070831.11	ENSG00000070831	CDC42
ENSG00000143776.14	ENSG00000143776	CDC42BPA
ENSG00000158985.9	ENSG00000158985	CDC42SE2
ENSG00000093009.5	ENSG00000093009	CDC45
ENSG00000094804.5	ENSG00000094804	CDC6
ENSG00000170779.10	ENSG00000170779	CDCA4
ENSG00000146670.5	ENSG00000146670	CDCA5
ENSG00000144354.9	ENSG00000144354	CDCA7
ENSG00000164649.15	ENSG00000164649	CDCA7L
ENSG00000134690.6	ENSG00000134690	CDCA8
ENSG00000040731.6	ENSG00000040731	CDH10
ENSG00000140937.9	ENSG00000140937	CDH11
ENSG00000170558.4	ENSG00000170558	CDH2
ENSG00000113361.8	ENSG00000113361	CDH6
ENSG00000065883.10	ENSG00000065883	CDK13
ENSG00000059758.3	ENSG00000059758	CDK17
ENSG00000111328.2	ENSG00000111328	CDK2AP1
ENSG00000135446.12	ENSG00000135446	CDK4
ENSG00000105810.5	ENSG00000105810	CDK6
ENSG00000138769.6	ENSG00000138769	CDKL2
ENSG00000124762.9	ENSG00000124762	CDKN1A
ENSG00000129757.8	ENSG00000129757	CDKN1C
ENSG00000168564.5	ENSG00000168564	CDKN2AIP
ENSG00000237190.3	ENSG00000237190	CDKN2AIPNL
ENSG00000129596.4	ENSG00000129596	CDO1
ENSG00000064309.10	ENSG00000064309	CDON
ENSG00000205643.6	ENSG00000205643	CDPF1
ENSG00000184258.5	ENSG00000184258	CDR1
ENSG00000109089.7	ENSG00000109089	CDR2L
ENSG00000101290.9	ENSG00000101290	CDS2
ENSG00000165556.9	ENSG00000165556	CDX2
ENSG00000153046.13	ENSG00000153046	CDYL
ENSG00000048740.13	ENSG00000048740	CELF2
ENSG00000101489.14	ENSG00000101489	CELF4
ENSG00000143126.7	ENSG00000143126	CELSR2
ENSG00000138778.7	ENSG00000138778	CENPE
ENSG00000117724.8	ENSG00000117724	CENPF
ENSG00000123219.8	ENSG00000123219	CENPK
ENSG00000100162.10	ENSG00000100162	CENPM
ENSG00000166451.9	ENSG00000166451	CENPN
ENSG00000102901.8	ENSG00000102901	CENPT
ENSG00000151725.7	ENSG00000151725	CENPU
ENSG00000203760.4	ENSG00000203760	CENPW
ENSG00000169689.10	ENSG00000169689	CENPX
ENSG00000110318.9	ENSG00000110318	CEP126
ENSG00000174799.6	ENSG00000174799	CEP135
ENSG00000135315.7	ENSG00000135315	CEP162
ENSG00000143702.11	ENSG00000143702	CEP170
ENSG00000154608.9	ENSG00000154608	CEP170P1
ENSG00000198707.10	ENSG00000198707	CEP290
ENSG00000135837.11	ENSG00000135837	CEP350
ENSG00000166037.6	ENSG00000166037	CEP57
ENSG00000183137.10	ENSG00000183137	CEP57L1
ENSG00000111860.9	ENSG00000111860	CEP85L
ENSG00000258890.2	ENSG00000258890	CEP95
ENSG00000182504.6	ENSG00000182504	CEP97
ENSG00000143418.15	ENSG00000143418	CERS2
ENSG00000188596.5	ENSG00000188596	CFAP54
ENSG00000164323.8	ENSG00000164323	CFAP97
ENSG00000165410.10	ENSG00000165410	CFL2
ENSG00000003402.15	ENSG00000003402	CFLAR
ENSG00000143942.4	ENSG00000143942	CHAC2
ENSG00000167670.11	ENSG00000167670	CHAF1A
ENSG00000159259.7	ENSG00000159259	CHAF1B
ENSG00000106153.12	ENSG00000106153	CHCHD2
ENSG00000163528.8	ENSG00000163528	CHCHD4
ENSG00000153922.6	ENSG00000153922	CHD1
ENSG00000173575.14	ENSG00000173575	CHD2
ENSG00000124177.10	ENSG00000124177	CHD6
ENSG00000171316.7	ENSG00000171316	CHD7
ENSG00000177200.11	ENSG00000177200	CHD9
ENSG00000086065.9	ENSG00000086065	CHMP5
ENSG00000187446.7	ENSG00000187446	CHP1
ENSG00000175344.12	ENSG00000175344	CHRNA7
ENSG00000169105.6	ENSG00000169105	CHST14
ENSG00000122863.5	ENSG00000122863	CHST3
ENSG00000263846.1	ENSG00000263846	CIAPIN1P
ENSG00000138433.11	ENSG00000138433	CIR1
ENSG00000169607.8	ENSG00000169607	CKAP2L
ENSG00000175216.10	ENSG00000175216	CKAP5
ENSG00000166165.8	ENSG00000166165	CKB
ENSG00000223572.5	ENSG00000223572	CKMT1A
ENSG00000237289.5	ENSG00000237289	CKMT1B
ENSG00000173207.8	ENSG00000173207	CKS1B
ENSG00000225976.4	ENSG00000225976	CKS1BP2
ENSG00000123975.4	ENSG00000123975	CKS2
ENSG00000074054.13	ENSG00000074054	CLASP1
ENSG00000163539.11	ENSG00000163539	CLASP2
ENSG00000109572.9	ENSG00000109572	CLCN3
ENSG00000080822.12	ENSG00000080822	CLDND1
ENSG00000166509.6	ENSG00000166509	CLEC3A
ENSG00000213719.4	ENSG00000213719	CLIC1
ENSG00000130779.15	ENSG00000130779	CLIP1
ENSG00000105270.10	ENSG00000105270	CLIP3
ENSG00000013441.11	ENSG00000013441	CLK1
ENSG00000176444.14	ENSG00000176444	CLK2
ENSG00000113240.8	ENSG00000113240	CLK4
ENSG00000134852.10	ENSG00000134852	CLOCK
ENSG00000163646.6	ENSG00000163646	CLRN1
ENSG00000092853.9	ENSG00000092853	CLSPN
ENSG00000120885.15	ENSG00000120885	CLU
ENSG00000164237.4	ENSG00000164237	CMBL
ENSG00000162368.9	ENSG00000162368	CMPK1
ENSG00000153551.9	ENSG00000153551	CMTM7
ENSG00000169714.12	ENSG00000169714	CNBP
ENSG00000133313.10	ENSG00000133313	CNDP2
ENSG00000064666.10	ENSG00000064666	CNN2
ENSG00000117519.11	ENSG00000117519	CNN3
ENSG00000168763.11	ENSG00000168763	CNNM3
ENSG00000111596.7	ENSG00000111596	CNOT2
ENSG00000080802.14	ENSG00000080802	CNOT4
ENSG00000138767.8	ENSG00000138767	CNOT6L
ENSG00000144580.9	ENSG00000144580	CNOT9
ENSG00000173786.12	ENSG00000173786	CNP
ENSG00000257727.1	ENSG00000257727	CNPY2
ENSG00000137161.12	ENSG00000137161	CNPY3
ENSG00000162852.9	ENSG00000162852	CNST
ENSG00000174469.13	ENSG00000174469	CNTNAP2
ENSG00000154529.10	ENSG00000154529	CNTNAP3B
ENSG00000119397.12	ENSG00000119397	CNTRL
ENSG00000136152.10	ENSG00000136152	COG3
ENSG00000060718.14	ENSG00000060718	COL11A1
ENSG00000187955.7	ENSG00000187955	COL14A1
ENSG00000139219.13	ENSG00000139219	COL2A1
ENSG00000197565.11	ENSG00000197565	COL4A6
ENSG00000204262.7	ENSG00000204262	COL5A2
ENSG00000130309.6	ENSG00000130309	COLGALT1
ENSG00000198756.6	ENSG00000198756	COLGALT2
ENSG00000148444.11	ENSG00000148444	COMMD3
ENSG00000140365.11	ENSG00000140365	COMMD4
ENSG00000170619.8	ENSG00000170619	COMMD5
ENSG00000188243.8	ENSG00000188243	COMMD6
ENSG00000110442.7	ENSG00000110442	COMMD9
ENSG00000122218.10	ENSG00000122218	COPA
ENSG00000166200.10	ENSG00000166200	COPS2
ENSG00000141030.8	ENSG00000141030	COPS3
ENSG00000144524.13	ENSG00000144524	COPS7B
ENSG00000198612.6	ENSG00000198612	COPS8
ENSG00000132423.6	ENSG00000132423	COQ3
ENSG00000167113.6	ENSG00000167113	COQ4
ENSG00000103187.6	ENSG00000103187	COTL1
ENSG00000006695.6	ENSG00000006695	COX10
ENSG00000163626.12	ENSG00000163626	COX18
ENSG00000135940.2	ENSG00000135940	COX5B
ENSG00000111775.2	ENSG00000111775	COX6A1
ENSG00000226976.1	ENSG00000226976	COX6A1P2
ENSG00000126267.4	ENSG00000126267	COX6B1
ENSG00000164919.6	ENSG00000164919	COX6C
ENSG00000112695.7	ENSG00000112695	COX7A2
ENSG00000115944.10	ENSG00000115944	COX7A2L
ENSG00000127184.6	ENSG00000127184	COX7C
ENSG00000176340.3	ENSG00000176340	COX8A
ENSG00000108582.7	ENSG00000108582	CPD
ENSG00000109472.9	ENSG00000109472	CPE
ENSG00000113742.8	ENSG00000113742	CPEB4
ENSG00000214078.7	ENSG00000214078	CPNE1
ENSG00000085719.7	ENSG00000085719	CPNE3
ENSG00000196353.7	ENSG00000196353	CPNE4
ENSG00000139117.9	ENSG00000139117	CPNE8
ENSG00000071894.10	ENSG00000071894	CPSF1
ENSG00000119203.9	ENSG00000119203	CPSF3
ENSG00000106066.9	ENSG00000106066	CPVL
ENSG00000166426.7	ENSG00000166426	CRABP1
ENSG00000143320.4	ENSG00000143320	CRABP2
ENSG00000113851.9	ENSG00000113851	CRBN
ENSG00000118260.10	ENSG00000118260	CREB1
ENSG00000182158.10	ENSG00000182158	CREB3L2
ENSG00000146592.12	ENSG00000146592	CREB5
ENSG00000005339.8	ENSG00000005339	CREBBP
ENSG00000137504.9	ENSG00000137504	CREBZF
ENSG00000163703.13	ENSG00000163703	CRELD1
ENSG00000150938.5	ENSG00000150938	CRIM1
ENSG00000182809.6	ENSG00000182809	CRIP2
ENSG00000119878.5	ENSG00000119878	CRIPT
ENSG00000176390.10	ENSG00000176390	CRLF3
ENSG00000072832.10	ENSG00000072832	CRMP1
ENSG00000245694.4	ENSG00000245694	CRNDE
ENSG00000005469.7	ENSG00000005469	CROT
ENSG00000170275.10	ENSG00000170275	CRTAP
ENSG00000105392.11	ENSG00000105392	CRX
ENSG00000205758.7	ENSG00000205758	CRYZL1
ENSG00000062485.14	ENSG00000062485	CS
ENSG00000124207.12	ENSG00000124207	CSE1L
ENSG00000223518.5	ENSG00000223518	CSNK1A1P1
ENSG00000213923.6	ENSG00000213923	CSNK1E
ENSG00000151292.13	ENSG00000151292	CSNK1G3
ENSG00000101266.12	ENSG00000101266	CSNK2A1
ENSG00000070770.4	ENSG00000070770	CSNK2A2
ENSG00000178662.11	ENSG00000178662	CSRNP3
ENSG00000159176.9	ENSG00000159176	CSRP1
ENSG00000175183.5	ENSG00000175183	CSRP2
ENSG00000101138.7	ENSG00000101138	CSTF1
ENSG00000176102.7	ENSG00000176102	CSTF3
ENSG00000159692.11	ENSG00000159692	CTBP1
ENSG00000175029.12	ENSG00000175029	CTBP2
ENSG00000175215.5	ENSG00000175215	CTDSP2
ENSG00000137770.9	ENSG00000137770	CTDSPL2
ENSG00000118523.5	ENSG00000118523	CTGF
ENSG00000116761.7	ENSG00000116761	CTH
ENSG00000044115.16	ENSG00000044115	CTNNA1
ENSG00000168036.12	ENSG00000168036	CTNNB1
ENSG00000198561.8	ENSG00000198561	CTNND1
ENSG00000169862.14	ENSG00000169862	CTNND2
ENSG00000171793.9	ENSG00000171793	CTPS1
ENSG00000047230.10	ENSG00000047230	CTPS2
ENSG00000164733.16	ENSG00000164733	CTSB
ENSG00000136943.6	ENSG00000136943	CTSV
ENSG00000085733.11	ENSG00000085733	CTTN
ENSG00000107874.6	ENSG00000107874	CUEDC2
ENSG00000055130.11	ENSG00000055130	CUL1
ENSG00000150316.7	ENSG00000150316	CWC15
ENSG00000154639.14	ENSG00000154639	CXADR
ENSG00000121966.6	ENSG00000121966	CXCR4
ENSG00000154832.10	ENSG00000154832	CXXC1
ENSG00000168772.9	ENSG00000168772	CXXC4
ENSG00000171604.7	ENSG00000171604	CXXC5
ENSG00000100243.16	ENSG00000100243	CYB5R3
ENSG00000172115.4	ENSG00000172115	CYCS
ENSG00000055163.14	ENSG00000055163	CYFIP2
ENSG00000083799.13	ENSG00000083799	CYLD
ENSG00000155016.13	ENSG00000155016	CYP2U1
ENSG00000173198.4	ENSG00000173198	CYSLTR1
ENSG00000120306.5	ENSG00000120306	CYSTM1
ENSG00000100592.11	ENSG00000100592	DAAM1
ENSG00000126733.16	ENSG00000126733	DACH2
ENSG00000178149.12	ENSG00000178149	DALRD3
ENSG00000226950.2	ENSG00000226950	DANCR
ENSG00000196730.8	ENSG00000196730	DAPK1
ENSG00000115866.6	ENSG00000115866	DARS
ENSG00000204209.6	ENSG00000204209	DAXX
ENSG00000183283.11	ENSG00000183283	DAZAP2
ENSG00000113758.9	ENSG00000113758	DBN1
ENSG00000185610.6	ENSG00000185610	DBX2
ENSG00000164934.9	ENSG00000164934	DCAF13
ENSG00000163257.6	ENSG00000163257	DCAF16
ENSG00000139990.13	ENSG00000139990	DCAF5
ENSG00000136485.10	ENSG00000136485	DCAF7
ENSG00000132716.14	ENSG00000132716	DCAF8
ENSG00000057019.11	ENSG00000057019	DCBLD2
ENSG00000187323.7	ENSG00000187323	DCC
ENSG00000197410.8	ENSG00000197410	DCHS2
ENSG00000133083.10	ENSG00000133083	DCLK1
ENSG00000152457.13	ENSG00000152457	DCLRE1C
ENSG00000110063.4	ENSG00000110063	DCPS
ENSG00000175203.11	ENSG00000175203	DCTN2
ENSG00000132912.8	ENSG00000132912	DCTN4
ENSG00000179958.4	ENSG00000179958	DCTPP1
ENSG00000043093.9	ENSG00000043093	DCUN1D1
ENSG00000109184.10	ENSG00000109184	DCUN1D4
ENSG00000077279.12	ENSG00000077279	DCX
ENSG00000153904.14	ENSG00000153904	DDAH1
ENSG00000213722.4	ENSG00000213722	DDAH2
ENSG00000167986.9	ENSG00000167986	DDB1
ENSG00000085788.9	ENSG00000085788	DDHD2
ENSG00000165490.8	ENSG00000165490	DDIAS
ENSG00000175197.6	ENSG00000175197	DDIT3
ENSG00000244038.5	ENSG00000244038	DDOST
ENSG00000204580.7	ENSG00000204580	DDR1
ENSG00000100201.14	ENSG00000100201	DDX17
ENSG00000088205.8	ENSG00000088205	DDX18
ENSG00000165732.8	ENSG00000165732	DDX21
ENSG00000174243.5	ENSG00000174243	DDX23
ENSG00000089737.11	ENSG00000089737	DDX24
ENSG00000182810.5	ENSG00000182810	DDX28
ENSG00000123136.10	ENSG00000123136	DDX39A
ENSG00000198563.9	ENSG00000198563	DDX39B
ENSG00000213782.3	ENSG00000213782	DDX47
ENSG00000108654.7	ENSG00000108654	DDX5
ENSG00000110367.7	ENSG00000110367	DDX6
ENSG00000140995.12	ENSG00000140995	DEF8
ENSG00000143753.8	ENSG00000143753	DEGS1
ENSG00000119522.11	ENSG00000119522	DENND1A
ENSG00000137145.16	ENSG00000137145	DENND4C
ENSG00000184014.3	ENSG00000184014	DENND5A
ENSG00000170456.10	ENSG00000170456	DENND5B
ENSG00000139726.6	ENSG00000139726	DENR
ENSG00000035499.8	ENSG00000035499	DEPDC1B
ENSG00000023697.8	ENSG00000023697	DERA
ENSG00000128185.5	ENSG00000128185	DGCR6L
ENSG00000128191.9	ENSG00000128191	DGCR8
ENSG00000133943.16	ENSG00000133943	DGLUCY
ENSG00000228716.2	ENSG00000228716	DHFR
ENSG00000162496.4	ENSG00000162496	DHRS3
ENSG00000215256.3	ENSG00000215256	DHRS4-AS1
ENSG00000109016.13	ENSG00000109016	DHRS7B
ENSG00000089876.7	ENSG00000089876	DHX32
ENSG00000174953.9	ENSG00000174953	DHX36
ENSG00000135829.12	ENSG00000135829	DHX9
ENSG00000100697.10	ENSG00000100697	DICER1
ENSG00000162595.4	ENSG00000162595	DIRAS3
ENSG00000231672.2	ENSG00000231672	DIRC3
ENSG00000166938.8	ENSG00000166938	DIS3L
ENSG00000144535.15	ENSG00000144535	DIS3L2
ENSG00000150764.9	ENSG00000150764	DIXDC1
ENSG00000050165.13	ENSG00000050165	DKK3
ENSG00000075711.16	ENSG00000075711	DLG1
ENSG00000185559.9	ENSG00000185559	DLK1
ENSG00000137038.7	ENSG00000137038	DMAC1
ENSG00000105341.14	ENSG00000105341	DMAC2
ENSG00000135164.14	ENSG00000135164	DMTF1
ENSG00000104093.9	ENSG00000104093	DMXL2
ENSG00000138346.10	ENSG00000138346	DNA2
ENSG00000164818.11	ENSG00000164818	DNAAF5
ENSG00000250091.2	ENSG00000250091	DNAH10OS
ENSG00000185842.10	ENSG00000185842	DNAH14
ENSG00000086061.11	ENSG00000086061	DNAJA1
ENSG00000069345.7	ENSG00000069345	DNAJA2
ENSG00000132002.3	ENSG00000132002	DNAJB1
ENSG00000164031.12	ENSG00000164031	DNAJB14
ENSG00000137094.10	ENSG00000137094	DNAJB5
ENSG00000105993.10	ENSG00000105993	DNAJB6
ENSG00000128590.4	ENSG00000128590	DNAJB9
ENSG00000116138.8	ENSG00000116138	DNAJC16
ENSG00000170464.5	ENSG00000170464	DNAJC18
ENSG00000168724.10	ENSG00000168724	DNAJC21
ENSG00000059769.15	ENSG00000059769	DNAJC25
ENSG00000102580.10	ENSG00000102580	DNAJC3
ENSG00000247400.3	ENSG00000247400	DNAJC3-AS1
ENSG00000168259.10	ENSG00000168259	DNAJC7
ENSG00000126698.6	ENSG00000126698	DNAJC8
ENSG00000213551.4	ENSG00000213551	DNAJC9
ENSG00000187957.7	ENSG00000187957	DNER
ENSG00000179532.8	ENSG00000179532	DNHD1
ENSG00000087470.13	ENSG00000087470	DNM1L
ENSG00000130816.10	ENSG00000130816	DNMT1
ENSG00000150760.8	ENSG00000150760	DOCK1
ENSG00000147251.11	ENSG00000147251	DOCK11
ENSG00000147459.13	ENSG00000147459	DOCK5
ENSG00000116641.11	ENSG00000116641	DOCK7
ENSG00000175283.7	ENSG00000175283	DOLK
ENSG00000083097.10	ENSG00000083097	DOPEY1
ENSG00000134146.7	ENSG00000134146	DPH6
ENSG00000121570.8	ENSG00000121570	DPPA4
ENSG00000092964.12	ENSG00000092964	DPYSL2
ENSG00000113657.8	ENSG00000113657	DPYSL3
ENSG00000157851.12	ENSG00000157851	DPYSL5
ENSG00000162490.6	ENSG00000162490	DRAXIN
ENSG00000134757.4	ENSG00000134757	DSG3
ENSG00000149636.11	ENSG00000149636	DSN1
ENSG00000096696.9	ENSG00000096696	DSP
ENSG00000151914.13	ENSG00000151914	DST
ENSG00000143476.13	ENSG00000143476	DTL
ENSG00000104047.10	ENSG00000104047	DTWD1
ENSG00000110042.3	ENSG00000110042	DTX4
ENSG00000168393.8	ENSG00000168393	DTYMK
ENSG00000140279.8	ENSG00000140279	DUOX2
ENSG00000120129.5	ENSG00000120129	DUSP1
ENSG00000143507.13	ENSG00000143507	DUSP10
ENSG00000081721.7	ENSG00000081721	DUSP12
ENSG00000162999.8	ENSG00000162999	DUSP19
ENSG00000139318.7	ENSG00000139318	DUSP6
ENSG00000161202.13	ENSG00000161202	DVL3
ENSG00000197102.6	ENSG00000197102	DYNC1H1
ENSG00000077380.11	ENSG00000077380	DYNC1I2
ENSG00000146425.6	ENSG00000146425	DYNLT1
ENSG00000134874.13	ENSG00000134874	DZIP1
ENSG00000007968.6	ENSG00000007968	E2F2
ENSG00000144597.9	ENSG00000144597	EAF1
ENSG00000129518.4	ENSG00000129518	EAPP
ENSG00000103356.11	ENSG00000103356	EARS2
ENSG00000164330.12	ENSG00000164330	EBF1
ENSG00000221818.4	ENSG00000221818	EBF2
ENSG00000117395.6	ENSG00000117395	EBNA1BP2
ENSG00000147155.6	ENSG00000147155	EBP
ENSG00000123179.9	ENSG00000123179	EBPL
ENSG00000127884.4	ENSG00000127884	ECHS1
ENSG00000114346.9	ENSG00000114346	ECT2
ENSG00000131080.10	ENSG00000131080	EDA2R
ENSG00000134109.6	ENSG00000134109	EDEM1
ENSG00000116406.14	ENSG00000116406	EDEM3
ENSG00000136160.10	ENSG00000136160	EDNRB
ENSG00000102189.12	ENSG00000102189	EEA1
ENSG00000228502.1	ENSG00000228502	EEF1A1P11
ENSG00000214199.3	ENSG00000214199	EEF1A1P12
ENSG00000250182.2	ENSG00000250182	EEF1A1P13
ENSG00000249855.1	ENSG00000249855	EEF1A1P19
ENSG00000245205.3	ENSG00000245205	EEF1A1P4
ENSG00000196205.7	ENSG00000196205	EEF1A1P5
ENSG00000233476.2	ENSG00000233476	EEF1A1P6
ENSG00000124802.7	ENSG00000124802	EEF1E1
ENSG00000118894.10	ENSG00000118894	EEF2KMT
ENSG00000203965.8	ENSG00000203965	EFCAB7
ENSG00000115380.14	ENSG00000115380	EFEMP1
ENSG00000184349.8	ENSG00000184349	EFNA5
ENSG00000125266.6	ENSG00000125266	EFNB2
ENSG00000138798.7	ENSG00000138798	EGF
ENSG00000206120.7	ENSG00000206120	EGFEM1P
ENSG00000146648.11	ENSG00000146648	EGFR
ENSG00000135766.8	ENSG00000135766	EGLN1
ENSG00000115504.10	ENSG00000115504	EHBP1
ENSG00000255302.3	ENSG00000255302	EID1
ENSG00000175376.4	ENSG00000175376	EIF1AD
ENSG00000173674.6	ENSG00000173674	EIF1AX
ENSG00000114784.3	ENSG00000114784	EIF1B
ENSG00000111361.8	ENSG00000111361	EIF2B1
ENSG00000115211.11	ENSG00000115211	EIF2B4
ENSG00000134001.8	ENSG00000134001	EIF2S1
ENSG00000125977.6	ENSG00000125977	EIF2S2
ENSG00000128692.7	ENSG00000128692	EIF2S2P4
ENSG00000130741.6	ENSG00000130741	EIF2S3
ENSG00000100353.13	ENSG00000100353	EIF3D
ENSG00000104408.5	ENSG00000104408	EIF3E
ENSG00000084623.7	ENSG00000084623	EIF3I
ENSG00000100129.13	ENSG00000100129	EIF3L
ENSG00000233837.1	ENSG00000233837	EIF3LP2
ENSG00000149100.8	ENSG00000149100	EIF3M
ENSG00000156976.10	ENSG00000156976	EIF4A2
ENSG00000141543.5	ENSG00000141543	EIF4A3
ENSG00000151247.8	ENSG00000151247	EIF4E
ENSG00000163412.8	ENSG00000163412	EIF4E3
ENSG00000187840.4	ENSG00000187840	EIF4EBP1
ENSG00000148730.6	ENSG00000148730	EIF4EBP2
ENSG00000229944.2	ENSG00000229944	EIF4EP2
ENSG00000114867.15	ENSG00000114867	EIF4G1
ENSG00000110321.11	ENSG00000110321	EIF4G2
ENSG00000075151.15	ENSG00000075151	EIF4G3
ENSG00000100664.6	ENSG00000100664	EIF5
ENSG00000132507.13	ENSG00000132507	EIF5A
ENSG00000107105.10	ENSG00000107105	ELAVL2
ENSG00000162374.12	ENSG00000162374	ELAVL4
ENSG00000109381.15	ENSG00000109381	ELF2
ENSG00000115459.13	ENSG00000115459	ELMOD3
ENSG00000156030.8	ENSG00000156030	ELMSAN1
ENSG00000103363.10	ENSG00000103363	ELOB
ENSG00000130165.6	ENSG00000130165	ELOF1
ENSG00000197977.3	ENSG00000197977	ELOVL2
ENSG00000012660.9	ENSG00000012660	ELOVL5
ENSG00000170522.5	ENSG00000170522	ELOVL6
ENSG00000134759.9	ENSG00000134759	ELP2
ENSG00000170291.10	ENSG00000170291	ELP5
ENSG00000163832.11	ENSG00000163832	ELP6
ENSG00000104412.3	ENSG00000104412	EMC2
ENSG00000158636.12	ENSG00000158636	EMSY
ENSG00000164778.4	ENSG00000164778	EN2
ENSG00000154380.12	ENSG00000154380	ENAH
ENSG00000171617.9	ENSG00000171617	ENC1
ENSG00000151023.12	ENSG00000151023	ENKUR
ENSG00000074800.9	ENSG00000074800	ENO1
ENSG00000111674.4	ENSG00000111674	ENO2
ENSG00000165675.12	ENSG00000165675	ENOX2
ENSG00000136960.8	ENSG00000136960	ENPP2
ENSG00000223797.1	ENSG00000223797	ENTPD3-AS1
ENSG00000197217.8	ENSG00000197217	ENTPD4
ENSG00000163378.9	ENSG00000163378	EOGT
ENSG00000088367.16	ENSG00000088367	EPB41L1
ENSG00000082397.11	ENSG00000082397	EPB41L3
ENSG00000129595.8	ENSG00000129595	EPB41L4A
ENSG00000152223.8	ENSG00000152223	EPG5
ENSG00000044524.6	ENSG00000044524	EPHA3
ENSG00000135333.9	ENSG00000135333	EPHA7
ENSG00000133216.12	ENSG00000133216	EPHB2
ENSG00000136628.13	ENSG00000136628	EPRS
ENSG00000085832.12	ENSG00000085832	EPS15
ENSG00000151491.8	ENSG00000151491	EPS8
ENSG00000178568.9	ENSG00000178568	ERBB4
ENSG00000112851.10	ENSG00000112851	ERBIN
ENSG00000082805.15	ENSG00000082805	ERC1
ENSG00000187672.8	ENSG00000187672	ERC2
ENSG00000087502.13	ENSG00000087502	ERGIC2
ENSG00000100632.6	ENSG00000100632	ERH
ENSG00000117419.10	ENSG00000117419	ERI3
ENSG00000164010.9	ENSG00000164010	ERMAP
ENSG00000197930.8	ENSG00000197930	ERO1A
ENSG00000023318.7	ENSG00000023318	ERP44
ENSG00000116285.8	ENSG00000116285	ERRFI1
ENSG00000171320.10	ENSG00000171320	ESCO2
ENSG00000139684.9	ENSG00000139684	ESD
ENSG00000089048.10	ENSG00000089048	ESF1
ENSG00000196482.12	ENSG00000196482	ESRRG
ENSG00000100056.7	ENSG00000100056	ESS2
ENSG00000139641.8	ENSG00000139641	ESYT1
ENSG00000120705.8	ENSG00000120705	ETF1
ENSG00000105379.5	ENSG00000105379	ETFB
ENSG00000139163.11	ENSG00000139163	ETNK1
ENSG00000244405.3	ENSG00000244405	ETV5
ENSG00000067208.10	ENSG00000067208	EVI5
ENSG00000164002.7	ENSG00000164002	EXO5
ENSG00000090989.13	ENSG00000090989	EXOC1
ENSG00000138190.12	ENSG00000138190	EXOC6
ENSG00000178896.6	ENSG00000178896	EXOSC4
ENSG00000223496.1	ENSG00000223496	EXOSC6
ENSG00000120699.8	ENSG00000120699	EXOSC8
ENSG00000123737.8	ENSG00000123737	EXOSC9
ENSG00000182197.6	ENSG00000182197	EXT1
ENSG00000158161.11	ENSG00000158161	EYA3
ENSG00000108799.8	ENSG00000108799	EZH1
ENSG00000117525.9	ENSG00000117525	F3
ENSG00000131944.5	ENSG00000131944	FAAP24
ENSG00000164687.6	ENSG00000164687	FABP5
ENSG00000164434.7	ENSG00000164434	FABP7
ENSG00000149485.12	ENSG00000149485	FADS1
ENSG00000180185.7	ENSG00000180185	FAHD1
ENSG00000133193.8	ENSG00000133193	FAM104A
ENSG00000169122.7	ENSG00000169122	FAM110B
ENSG00000166801.11	ENSG00000166801	FAM111A
ENSG00000189057.6	ENSG00000189057	FAM111B
ENSG00000138439.10	ENSG00000138439	FAM117B
ENSG00000197798.4	ENSG00000197798	FAM118B
ENSG00000234545.3	ENSG00000234545	FAM133B
ENSG00000035141.3	ENSG00000035141	FAM136A
ENSG00000138640.10	ENSG00000138640	FAM13A
ENSG00000148541.8	ENSG00000148541	FAM13C
ENSG00000138286.10	ENSG00000138286	FAM149B1
ENSG00000204442.2	ENSG00000204442	FAM155A
ENSG00000151553.10	ENSG00000151553	FAM160B1
ENSG00000114023.11	ENSG00000114023	FAM162A
ENSG00000054965.6	ENSG00000054965	FAM168A
ENSG00000198780.7	ENSG00000198780	FAM169A
ENSG00000144369.8	ENSG00000144369	FAM171B
ENSG00000140067.6	ENSG00000140067	FAM181A
ENSG00000188916.4	ENSG00000188916	FAM196A
ENSG00000164125.11	ENSG00000164125	FAM198B
ENSG00000163946.9	ENSG00000163946	FAM208A
ENSG00000177150.8	ENSG00000177150	FAM210A
ENSG00000047346.8	ENSG00000047346	FAM214A
ENSG00000178761.10	ENSG00000178761	FAM219B
ENSG00000219626.4	ENSG00000219626	FAM228B
ENSG00000203778.3	ENSG00000203778	FAM229B
ENSG00000084444.9	ENSG00000084444	FAM234B
ENSG00000174749.5	ENSG00000174749	FAM241A
ENSG00000105058.7	ENSG00000105058	FAM32A
ENSG00000196937.6	ENSG00000196937	FAM3C
ENSG00000197872.7	ENSG00000197872	FAM49A
ENSG00000167695.10	ENSG00000167695	FAM57A
ENSG00000009780.11	ENSG00000009780	FAM76A
ENSG00000162981.12	ENSG00000162981	FAM84A
ENSG00000253893.2	ENSG00000253893	FAM85B
ENSG00000160172.6	ENSG00000160172	FAM86C2P
ENSG00000137414.5	ENSG00000137414	FAM8A1
ENSG00000144554.6	ENSG00000144554	FANCD2
ENSG00000187790.6	ENSG00000187790	FANCM
ENSG00000197601.8	ENSG00000197601	FAR1
ENSG00000180178.6	ENSG00000180178	FAR2P1
ENSG00000178162.4	ENSG00000178162	FAR2P2
ENSG00000152767.11	ENSG00000152767	FARP1
ENSG00000179115.6	ENSG00000179115	FARSA
ENSG00000116120.8	ENSG00000116120	FARSB
ENSG00000026103.15	ENSG00000026103	FAS
ENSG00000124279.7	ENSG00000124279	FASTKD3
ENSG00000165323.11	ENSG00000165323	FAT3
ENSG00000196159.7	ENSG00000196159	FAT4
ENSG00000149806.6	ENSG00000149806	FAU
ENSG00000162458.8	ENSG00000162458	FBLIM1
ENSG00000077942.13	ENSG00000077942	FBLN1
ENSG00000166147.9	ENSG00000166147	FBN1
ENSG00000138829.6	ENSG00000138829	FBN2
ENSG00000108306.7	ENSG00000108306	FBXL20
ENSG00000118564.10	ENSG00000118564	FBXL5
ENSG00000183580.8	ENSG00000183580	FBXL7
ENSG00000135108.10	ENSG00000135108	FBXO21
ENSG00000037637.6	ENSG00000037637	FBXO42
ENSG00000204923.3	ENSG00000204923	FBXO48
ENSG00000112029.5	ENSG00000112029	FBXO5
ENSG00000164117.8	ENSG00000164117	FBXO8
ENSG00000109670.9	ENSG00000109670	FBXW7
ENSG00000228638.1	ENSG00000228638	FCF1P2
ENSG00000079459.8	ENSG00000079459	FDFT1
ENSG00000160752.10	ENSG00000160752	FDPS
ENSG00000168496.3	ENSG00000168496	FEN1
ENSG00000151422.8	ENSG00000151422	FER
ENSG00000149557.8	ENSG00000149557	FEZ1
ENSG00000171055.10	ENSG00000171055	FEZ2
ENSG00000139132.10	ENSG00000139132	FGD4
ENSG00000225733.1	ENSG00000225733	FGD5-AS1
ENSG00000114279.9	ENSG00000114279	FGF12
ENSG00000102466.11	ENSG00000102466	FGF14
ENSG00000138685.8	ENSG00000138685	FGF2
ENSG00000138675.12	ENSG00000138675	FGF5
ENSG00000174721.9	ENSG00000174721	FGFBP3
ENSG00000077782.15	ENSG00000077782	FGFR1
ENSG00000066468.16	ENSG00000066468	FGFR2
ENSG00000091483.6	ENSG00000091483	FH
ENSG00000137460.4	ENSG00000137460	FHDC1
ENSG00000182263.9	ENSG00000182263	FIGN
ENSG00000214253.4	ENSG00000214253	FIS1
ENSG00000088832.10	ENSG00000088832	FKBP1A
ENSG00000198225.4	ENSG00000198225	FKBP1C
ENSG00000096060.10	ENSG00000096060	FKBP5
ENSG00000122642.6	ENSG00000122642	FKBP9
ENSG00000176826.11	ENSG00000176826	FKBP9P1
ENSG00000154803.8	ENSG00000154803	FLCN
ENSG00000185070.6	ENSG00000185070	FLRT2
ENSG00000125848.9	ENSG00000125848	FLRT3
ENSG00000162769.8	ENSG00000162769	FLVCR1
ENSG00000157827.15	ENSG00000157827	FMNL2
ENSG00000141560.10	ENSG00000141560	FN3KRP
ENSG00000187239.12	ENSG00000187239	FNBP1
ENSG00000137942.12	ENSG00000137942	FNBP1L
ENSG00000109920.8	ENSG00000109920	FNBP4
ENSG00000228594.1	ENSG00000228594	FNDC10
ENSG00000102531.12	ENSG00000102531	FNDC3A
ENSG00000160097.11	ENSG00000160097	FNDC5
ENSG00000217128.7	ENSG00000217128	FNIP1
ENSG00000052795.8	ENSG00000052795	FNIP2
ENSG00000188352.8	ENSG00000188352	FOCAD
ENSG00000133393.8	ENSG00000133393	FOPNL
ENSG00000170345.5	ENSG00000170345	FOS
ENSG00000065970.4	ENSG00000065970	FOXJ2
ENSG00000164916.9	ENSG00000164916	FOXK1
ENSG00000111206.8	ENSG00000111206	FOXM1
ENSG00000053254.11	ENSG00000053254	FOXN3
ENSG00000150907.6	ENSG00000150907	FOXO1
ENSG00000118689.10	ENSG00000118689	FOXO3
ENSG00000114861.14	ENSG00000114861	FOXP1
ENSG00000110074.6	ENSG00000110074	FOXRED1
ENSG00000254685.2	ENSG00000254685	FPGT
ENSG00000138759.13	ENSG00000138759	FRAS1
ENSG00000164946.15	ENSG00000164946	FREM1
ENSG00000150893.9	ENSG00000150893	FREM2
ENSG00000109536.7	ENSG00000109536	FRG1
ENSG00000151474.15	ENSG00000151474	FRMD4A
ENSG00000114541.10	ENSG00000114541	FRMD4B
ENSG00000171877.15	ENSG00000171877	FRMD5
ENSG00000126391.9	ENSG00000126391	FRMD8
ENSG00000075539.9	ENSG00000075539	FRYL
ENSG00000162998.4	ENSG00000162998	FRZB
ENSG00000106701.7	ENSG00000106701	FSD1L
ENSG00000188738.9	ENSG00000188738	FSIP2
ENSG00000134363.7	ENSG00000134363	FST
ENSG00000163430.5	ENSG00000163430	FSTL1
ENSG00000087086.9	ENSG00000087086	FTL
ENSG00000108592.12	ENSG00000108592	FTSJ3
ENSG00000230590.3	ENSG00000230590	FTX
ENSG00000162613.12	ENSG00000162613	FUBP1
ENSG00000179163.11	ENSG00000179163	FUCA1
ENSG00000089280.14	ENSG00000089280	FUS
ENSG00000196968.6	ENSG00000196968	FUT11
ENSG00000033170.12	ENSG00000033170	FUT8
ENSG00000137726.11	ENSG00000137726	FXYD6
ENSG00000010810.13	ENSG00000010810	FYN
ENSG00000111432.4	ENSG00000111432	FZD10
ENSG00000250208.2	ENSG00000250208	FZD10-AS1
ENSG00000104290.6	ENSG00000104290	FZD3
ENSG00000155760.1	ENSG00000155760	FZD7
ENSG00000092140.10	ENSG00000092140	G2E3
ENSG00000128683.9	ENSG00000128683	GAD1
ENSG00000197093.6	ENSG00000197093	GAL3ST4
ENSG00000117308.10	ENSG00000117308	GALE
ENSG00000164574.11	ENSG00000164574	GALNT10
ENSG00000185274.7	ENSG00000185274	GALNT17
ENSG00000197487.4	ENSG00000197487	GALP
ENSG00000261609.3	ENSG00000261609	GAN
ENSG00000172020.8	ENSG00000172020	GAP43
ENSG00000111640.10	ENSG00000111640	GAPDH
ENSG00000251013.1	ENSG00000251013	GAPDHP62
ENSG00000165219.17	ENSG00000165219	GAPVD1
ENSG00000180447.5	ENSG00000180447	GAS1
ENSG00000139354.6	ENSG00000139354	GAS2L3
ENSG00000234741.3	ENSG00000234741	GAS5
ENSG00000157259.6	ENSG00000157259	GATAD1
ENSG00000167491.13	ENSG00000167491	GATAD2A
ENSG00000143614.7	ENSG00000143614	GATAD2B
ENSG00000177628.11	ENSG00000177628	GBA
ENSG00000160766.10	ENSG00000160766	GBAP1
ENSG00000114480.8	ENSG00000114480	GBE1
ENSG00000162654.8	ENSG00000162654	GBP4
ENSG00000100116.12	ENSG00000100116	GCAT
ENSG00000135968.15	ENSG00000135968	GCC2
ENSG00000137880.4	ENSG00000137880	GCHFR
ENSG00000140905.5	ENSG00000140905	GCSH
ENSG00000104381.8	ENSG00000104381	GDAP1
ENSG00000142252.6	ENSG00000142252	GEMIN7
ENSG00000178295.10	ENSG00000178295	GEN1
ENSG00000198380.8	ENSG00000198380	GFPT1
ENSG00000151892.10	ENSG00000151892	GFRA1
ENSG00000006625.13	ENSG00000006625	GGCT
ENSG00000137563.7	ENSG00000137563	GGH
ENSG00000101193.6	ENSG00000101193	GID8
ENSG00000146830.9	ENSG00000146830	GIGYF1
ENSG00000204120.10	ENSG00000204120	GIGYF2
ENSG00000131153.4	ENSG00000131153	GINS2
ENSG00000147536.7	ENSG00000147536	GINS4
ENSG00000152661.7	ENSG00000152661	GJA1
ENSG00000182963.5	ENSG00000182963	GJC1
ENSG00000165113.8	ENSG00000165113	GKAP1
ENSG00000106415.8	ENSG00000106415	GLCCI1
ENSG00000090863.7	ENSG00000090863	GLG1
ENSG00000074047.16	ENSG00000074047	GLI2
ENSG00000106571.8	ENSG00000106571	GLI3
ENSG00000122694.11	ENSG00000122694	GLIPR2
ENSG00000198715.7	ENSG00000198715	GLMP
ENSG00000124767.6	ENSG00000124767	GLO1
ENSG00000115419.8	ENSG00000115419	GLS
ENSG00000148672.7	ENSG00000148672	GLUD1
ENSG00000254717.2	ENSG00000254717	GLYATL1P2
ENSG00000197045.8	ENSG00000197045	GMFB
ENSG00000112312.5	ENSG00000112312	GMNN
ENSG00000100938.13	ENSG00000100938	GMPR2
ENSG00000163655.11	ENSG00000163655	GMPS
ENSG00000114353.12	ENSG00000114353	GNAI2
ENSG00000087460.19	ENSG00000087460	GNAS
ENSG00000186469.4	ENSG00000186469	GNG2
ENSG00000162188.5	ENSG00000162188	GNG3
ENSG00000168243.6	ENSG00000168243	GNG4
ENSG00000163938.12	ENSG00000163938	GNL3
ENSG00000111670.10	ENSG00000111670	GNPTAB
ENSG00000144674.12	ENSG00000144674	GOLGA4
ENSG00000184206.7	ENSG00000184206	GOLGA6L4
ENSG00000230373.4	ENSG00000230373	GOLGA6L5P
ENSG00000197978.8	ENSG00000197978	GOLGA6L9
ENSG00000175265.13	ENSG00000175265	GOLGA8A
ENSG00000215252.7	ENSG00000215252	GOLGA8B
ENSG00000173230.11	ENSG00000173230	GOLGB1
ENSG00000173905.4	ENSG00000173905	GOLIM4
ENSG00000170270.4	ENSG00000170270	GON7
ENSG00000108587.10	ENSG00000108587	GOSR1
ENSG00000108433.11	ENSG00000108433	GOSR2
ENSG00000197858.6	ENSG00000197858	GPAA1
ENSG00000089916.13	ENSG00000089916	GPATCH2L
ENSG00000160818.12	ENSG00000160818	GPATCH4
ENSG00000186566.7	ENSG00000186566	GPATCH8
ENSG00000147257.9	ENSG00000147257	GPC3
ENSG00000183098.6	ENSG00000183098	GPC6
ENSG00000125772.8	ENSG00000125772	GPCPD1
ENSG00000105220.10	ENSG00000105220	GPI
ENSG00000150625.12	ENSG00000150625	GPM6A
ENSG00000046653.10	ENSG00000046653	GPM6B
ENSG00000198522.9	ENSG00000198522	GPN1
ENSG00000183671.8	ENSG00000183671	GPR1
ENSG00000180998.7	ENSG00000180998	GPR137C
ENSG00000101850.8	ENSG00000101850	GPR143
ENSG00000163328.9	ENSG00000163328	GPR155
ENSG00000183150.3	ENSG00000183150	GPR19
ENSG00000169727.8	ENSG00000169727	GPS1
ENSG00000121957.8	ENSG00000121957	GPSM2
ENSG00000233276.2	ENSG00000233276	GPX1
ENSG00000211445.7	ENSG00000211445	GPX3
ENSG00000167468.12	ENSG00000167468	GPX4
ENSG00000164294.9	ENSG00000164294	GPX8
ENSG00000106070.13	ENSG00000106070	GRB10
ENSG00000141449.10	ENSG00000141449	GREB1L
ENSG00000137106.13	ENSG00000137106	GRHPR
ENSG00000155511.13	ENSG00000155511	GRIA1
ENSG00000120251.14	ENSG00000120251	GRIA2
ENSG00000152578.8	ENSG00000152578	GRIA4
ENSG00000152208.7	ENSG00000152208	GRID2
ENSG00000198822.6	ENSG00000198822	GRM3
ENSG00000030582.12	ENSG00000030582	GRN
ENSG00000164284.10	ENSG00000164284	GRPEL2
ENSG00000105447.8	ENSG00000105447	GRWD1
ENSG00000131149.13	ENSG00000131149	GSE1
ENSG00000082701.10	ENSG00000082701	GSK3B
ENSG00000170899.6	ENSG00000170899	GSTA4
ENSG00000134202.6	ENSG00000134202	GSTM3
ENSG00000084207.11	ENSG00000084207	GSTP1
ENSG00000121964.10	ENSG00000121964	GTDC1
ENSG00000140307.6	ENSG00000140307	GTF2A2
ENSG00000188342.7	ENSG00000188342	GTF2F2
ENSG00000145736.10	ENSG00000145736	GTF2H2
ENSG00000233369.3	ENSG00000233369	GTF2IP4
ENSG00000119041.6	ENSG00000119041	GTF3C3
ENSG00000125484.7	ENSG00000125484	GTF3C4
ENSG00000138867.12	ENSG00000138867	GUCD1
ENSG00000144366.11	ENSG00000144366	GULP1
ENSG00000169919.12	ENSG00000169919	GUSB
ENSG00000241549.4	ENSG00000241549	GUSBP2
ENSG00000253203.2	ENSG00000253203	GUSBP3
ENSG00000105968.14	ENSG00000105968	H2AFV
ENSG00000099284.9	ENSG00000099284	H2AFY2
ENSG00000164032.7	ENSG00000164032	H2AFZ
ENSG00000132475.4	ENSG00000132475	H3F3B
ENSG00000188375.3	ENSG00000188375	H3F3C
ENSG00000130956.9	ENSG00000130956	HABP4
ENSG00000074696.8	ENSG00000074696	HACD3
ENSG00000085382.7	ENSG00000085382	HACE1
ENSG00000138796.11	ENSG00000138796	HADH
ENSG00000084754.6	ENSG00000084754	HADHA
ENSG00000128708.8	ENSG00000128708	HAT1
ENSG00000249115.4	ENSG00000249115	HAUS5
ENSG00000147874.6	ENSG00000147874	HAUS6
ENSG00000213397.6	ENSG00000213397	HAUS7
ENSG00000131351.10	ENSG00000131351	HAUS8
ENSG00000105856.9	ENSG00000105856	HBP1
ENSG00000196591.7	ENSG00000196591	HDAC2
ENSG00000171720.5	ENSG00000171720	HDAC3
ENSG00000048052.17	ENSG00000048052	HDAC9
ENSG00000166503.4	ENSG00000166503	HDGFL3
ENSG00000165259.9	ENSG00000165259	HDX
ENSG00000008869.7	ENSG00000008869	HEATR5B
ENSG00000112406.4	ENSG00000112406	HECA
ENSG00000173064.6	ENSG00000173064	HECTD4
ENSG00000173706.8	ENSG00000173706	HEG1
ENSG00000119969.10	ENSG00000119969	HELLS
ENSG00000198265.7	ENSG00000198265	HELZ
ENSG00000089472.12	ENSG00000089472	HEPH
ENSG00000103657.9	ENSG00000103657	HERC1
ENSG00000128731.11	ENSG00000128731	HERC2
ENSG00000260644.2	ENSG00000260644	HERC2P5
ENSG00000261599.1	ENSG00000261599	HERC2P8
ENSG00000206149.6	ENSG00000206149	HERC2P9
ENSG00000148634.11	ENSG00000148634	HERC4
ENSG00000051108.10	ENSG00000051108	HERPUD1
ENSG00000144485.6	ENSG00000144485	HES6
ENSG00000198130.10	ENSG00000198130	HIBCH
ENSG00000124440.11	ENSG00000124440	HIF3A
ENSG00000181061.9	ENSG00000181061	HIGD1A
ENSG00000064393.11	ENSG00000064393	HIPK2
ENSG00000149929.11	ENSG00000149929	HIRIP3
ENSG00000184357.3	ENSG00000184357	HIST1H1B
ENSG00000168298.4	ENSG00000168298	HIST1H1E
ENSG00000197061.3	ENSG00000197061	HIST1H4C
ENSG00000159399.5	ENSG00000159399	HK2
ENSG00000071794.11	ENSG00000071794	HLTF
ENSG00000256269.2	ENSG00000256269	HMBS
ENSG00000137309.15	ENSG00000137309	HMGA1
ENSG00000149948.9	ENSG00000149948	HMGA2
ENSG00000213707.2	ENSG00000213707	HMGB1P10
ENSG00000132967.9	ENSG00000132967	HMGB1P5
ENSG00000259781.1	ENSG00000259781	HMGB1P6
ENSG00000164104.7	ENSG00000164104	HMGB2
ENSG00000117305.10	ENSG00000117305	HMGCL
ENSG00000113161.11	ENSG00000113161	HMGCR
ENSG00000112972.10	ENSG00000112972	HMGCS1
ENSG00000205581.6	ENSG00000205581	HMGN1
ENSG00000198830.6	ENSG00000198830	HMGN2
ENSG00000118418.10	ENSG00000118418	HMGN3
ENSG00000198157.6	ENSG00000198157	HMGN5
ENSG00000100281.9	ENSG00000100281	HMGXB4
ENSG00000072571.15	ENSG00000072571	HMMR
ENSG00000135486.13	ENSG00000135486	HNRNPA1
ENSG00000139675.10	ENSG00000139675	HNRNPA1L2
ENSG00000214223.3	ENSG00000214223	HNRNPA1P10
ENSG00000225695.1	ENSG00000225695	HNRNPA1P35
ENSG00000206228.4	ENSG00000206228	HNRNPA1P4
ENSG00000212961.4	ENSG00000212961	HNRNPA1P40
ENSG00000224578.3	ENSG00000224578	HNRNPA1P48
ENSG00000236539.3	ENSG00000236539	HNRNPA1P54
ENSG00000215492.5	ENSG00000215492	HNRNPA1P7
ENSG00000229251.2	ENSG00000229251	HNRNPA1P8
ENSG00000122566.16	ENSG00000122566	HNRNPA2B1
ENSG00000170144.14	ENSG00000170144	HNRNPA3
ENSG00000204253.3	ENSG00000204253	HNRNPCP2
ENSG00000169813.12	ENSG00000169813	HNRNPF
ENSG00000169045.13	ENSG00000169045	HNRNPH1
ENSG00000126945.8	ENSG00000126945	HNRNPH2
ENSG00000096746.13	ENSG00000096746	HNRNPH3
ENSG00000104824.12	ENSG00000104824	HNRNPL
ENSG00000143889.11	ENSG00000143889	HNRNPLL
ENSG00000125944.14	ENSG00000125944	HNRNPR
ENSG00000153187.12	ENSG00000153187	HNRNPU
ENSG00000105323.12	ENSG00000105323	HNRNPUL1
ENSG00000103942.8	ENSG00000103942	HOMER2
ENSG00000168172.4	ENSG00000168172	HOOK3
ENSG00000233429.5	ENSG00000233429	HOTAIRM1
ENSG00000253293.3	ENSG00000253293	HOXA10
ENSG00000105996.5	ENSG00000105996	HOXA2
ENSG00000105997.18	ENSG00000105997	HOXA3
ENSG00000197576.9	ENSG00000197576	HOXA4
ENSG00000106004.4	ENSG00000106004	HOXA5
ENSG00000078399.11	ENSG00000078399	HOXA9
ENSG00000254369.2	ENSG00000254369	HOXA-AS3
ENSG00000120093.7	ENSG00000120093	HOXB3
ENSG00000108511.8	ENSG00000108511	HOXB6
ENSG00000260027.3	ENSG00000260027	HOXB7
ENSG00000233101.6	ENSG00000233101	HOXB-AS3
ENSG00000180818.4	ENSG00000180818	HOXC10
ENSG00000037965.4	ENSG00000037965	HOXC8
ENSG00000180806.4	ENSG00000180806	HOXC9
ENSG00000128652.7	ENSG00000128652	HOXD3
ENSG00000175879.7	ENSG00000175879	HOXD8
ENSG00000127483.13	ENSG00000127483	HP1BP3
ENSG00000100099.16	ENSG00000100099	HPS4
ENSG00000118960.8	ENSG00000118960	HS1BP3
ENSG00000125430.4	ENSG00000125430	HS3ST3B1
ENSG00000136720.6	ENSG00000136720	HS6ST1
ENSG00000171004.13	ENSG00000171004	HS6ST2
ENSG00000230989.2	ENSG00000230989	HSBP1
ENSG00000149084.7	ENSG00000149084	HSD17B12
ENSG00000132196.9	ENSG00000132196	HSD17B7
ENSG00000119471.10	ENSG00000119471	HSDL2
ENSG00000025156.8	ENSG00000025156	HSF2
ENSG00000224411.2	ENSG00000224411	HSP90AA2P
ENSG00000096384.15	ENSG00000096384	HSP90AB1
ENSG00000166598.8	ENSG00000166598	HSP90B1
ENSG00000165868.8	ENSG00000165868	HSPA12A
ENSG00000155304.4	ENSG00000155304	HSPA13
ENSG00000164070.7	ENSG00000164070	HSPA4L
ENSG00000044574.7	ENSG00000044574	HSPA5
ENSG00000113013.8	ENSG00000113013	HSPA9
ENSG00000144381.12	ENSG00000144381	HSPD1
ENSG00000213430.5	ENSG00000213430	HSPD1P1
ENSG00000115541.6	ENSG00000115541	HSPE1
ENSG00000120694.15	ENSG00000120694	HSPH1
ENSG00000142149.4	ENSG00000142149	HUNK
ENSG00000242028.1	ENSG00000242028	HYPK
ENSG00000196305.13	ENSG00000196305	IARS
ENSG00000005700.10	ENSG00000005700	IBTK
ENSG00000163596.12	ENSG00000163596	ICA1L
ENSG00000115738.5	ENSG00000115738	ID2
ENSG00000117318.8	ENSG00000117318	ID3
ENSG00000067064.6	ENSG00000067064	IDI1
ENSG00000152778.7	ENSG00000152778	IFIT5
ENSG00000185885.11	ENSG00000185885	IFITM1
ENSG00000142089.11	ENSG00000142089	IFITM3
ENSG00000027697.8	ENSG00000027697	IFNGR1
ENSG00000159128.10	ENSG00000159128	IFNGR2
ENSG00000006652.9	ENSG00000006652	IFRD1
ENSG00000214706.6	ENSG00000214706	IFRD2
ENSG00000138002.10	ENSG00000138002	IFT172
ENSG00000109083.9	ENSG00000109083	IFT20
ENSG00000128581.11	ENSG00000128581	IFT22
ENSG00000114446.4	ENSG00000114446	IFT57
ENSG00000096872.11	ENSG00000096872	IFT74
ENSG00000068885.10	ENSG00000068885	IFT80
ENSG00000174498.9	ENSG00000174498	IGDCC3
ENSG00000103742.7	ENSG00000103742	IGDCC4
ENSG00000140443.9	ENSG00000140443	IGF1R
ENSG00000159217.5	ENSG00000159217	IGF2BP1
ENSG00000073792.11	ENSG00000073792	IGF2BP2
ENSG00000115461.4	ENSG00000115461	IGFBP5
ENSG00000143061.13	ENSG00000143061	IGSF3
ENSG00000113141.11	ENSG00000113141	IK
ENSG00000131724.6	ENSG00000131724	IL13RA1
ENSG00000144730.12	ENSG00000144730	IL17RD
ENSG00000196083.5	ENSG00000196083	IL1RAP
ENSG00000169306.5	ENSG00000169306	IL1RAPL1
ENSG00000143195.8	ENSG00000143195	ILDR2
ENSG00000143621.12	ENSG00000143621	ILF2
ENSG00000177971.7	ENSG00000177971	IMP3
ENSG00000104331.4	ENSG00000104331	IMPAD1
ENSG00000178035.7	ENSG00000178035	IMPDH2
ENSG00000148798.5	ENSG00000148798	INA
ENSG00000163362.6	ENSG00000163362	INAVA
ENSG00000111653.15	ENSG00000111653	ING4
ENSG00000163083.5	ENSG00000163083	INHBB
ENSG00000241644.2	ENSG00000241644	INMT
ENSG00000040933.11	ENSG00000040933	INPP4A
ENSG00000068383.14	ENSG00000068383	INPP5A
ENSG00000198825.7	ENSG00000198825	INPP5F
ENSG00000186480.8	ENSG00000186480	INSIG1
ENSG00000125629.10	ENSG00000125629	INSIG2
ENSG00000104613.7	ENSG00000104613	INTS10
ENSG00000108506.7	ENSG00000108506	INTS2
ENSG00000143624.9	ENSG00000143624	INTS3
ENSG00000236778.3	ENSG00000236778	INTS6-AS1
ENSG00000104299.10	ENSG00000104299	INTS9
ENSG00000164066.8	ENSG00000164066	INTU
ENSG00000068745.10	ENSG00000068745	IP6K2
ENSG00000269837.1	ENSG00000269837	IPO5P1
ENSG00000133704.5	ENSG00000133704	IPO8
ENSG00000198700.5	ENSG00000198700	IPO9
ENSG00000183856.6	ENSG00000183856	IQGAP3
ENSG00000136381.8	ENSG00000136381	IREB2
ENSG00000169047.5	ENSG00000169047	IRS1
ENSG00000066583.7	ENSG00000066583	ISOC1
ENSG00000105655.14	ENSG00000105655	ISYNA1
ENSG00000213949.4	ENSG00000213949	ITGA1
ENSG00000164171.6	ENSG00000164171	ITGA2
ENSG00000091409.10	ENSG00000091409	ITGA6
ENSG00000138448.7	ENSG00000138448	ITGAV
ENSG00000150093.14	ENSG00000150093	ITGB1
ENSG00000142856.12	ENSG00000142856	ITGB3BP
ENSG00000105855.5	ENSG00000105855	ITGB8
ENSG00000136156.8	ENSG00000136156	ITM2B
ENSG00000123104.7	ENSG00000123104	ITPR2
ENSG00000101384.7	ENSG00000101384	JAG1
ENSG00000171135.10	ENSG00000171135	JAGN1
ENSG00000162434.7	ENSG00000162434	JAK1
ENSG00000176049.11	ENSG00000176049	JAKMIP2
ENSG00000154721.10	ENSG00000154721	JAM2
ENSG00000166086.8	ENSG00000166086	JAM3
ENSG00000008083.9	ENSG00000008083	JARID2
ENSG00000153814.7	ENSG00000153814	JAZF1
ENSG00000171988.13	ENSG00000171988	JMJD1C
ENSG00000070495.10	ENSG00000070495	JMJD6
ENSG00000189159.11	ENSG00000189159	JPT1
ENSG00000206053.8	ENSG00000206053	JPT2
ENSG00000225470.2	ENSG00000225470	JPX
ENSG00000130522.4	ENSG00000130522	JUND
ENSG00000120071.8	ENSG00000120071	KANSL1
ENSG00000114982.13	ENSG00000114982	KANSL3
ENSG00000114166.7	ENSG00000114166	KAT2B
ENSG00000083168.5	ENSG00000083168	KAT6A
ENSG00000156650.8	ENSG00000156650	KAT6B
ENSG00000136504.7	ENSG00000136504	KAT7
ENSG00000102781.9	ENSG00000102781	KATNAL1
ENSG00000134152.6	ENSG00000134152	KATNBL1
ENSG00000183960.4	ENSG00000183960	KCNH8
ENSG00000269821.1	ENSG00000269821	KCNQ1OT1
ENSG00000110906.8	ENSG00000110906	KCTD10
ENSG00000136636.8	ENSG00000136636	KCTD3
ENSG00000136240.5	ENSG00000136240	KDELR2
ENSG00000004487.11	ENSG00000004487	KDM1A
ENSG00000115548.12	ENSG00000115548	KDM3A
ENSG00000073614.7	ENSG00000073614	KDM5A
ENSG00000117139.12	ENSG00000117139	KDM5B
ENSG00000147050.10	ENSG00000147050	KDM6A
ENSG00000170871.7	ENSG00000170871	KIAA0232
ENSG00000142687.13	ENSG00000142687	KIAA0319L
ENSG00000166398.8	ENSG00000166398	KIAA0355
ENSG00000138688.11	ENSG00000138688	KIAA1109
ENSG00000257093.2	ENSG00000257093	KIAA1147
ENSG00000164659.10	ENSG00000164659	KIAA1324L
ENSG00000150477.10	ENSG00000150477	KIAA1328
ENSG00000165185.10	ENSG00000165185	KIAA1958
ENSG00000183354.7	ENSG00000183354	KIAA2026
ENSG00000134313.10	ENSG00000134313	KIDINS220
ENSG00000054523.12	ENSG00000054523	KIF1B
ENSG00000139116.13	ENSG00000139116	KIF21A
ENSG00000116852.10	ENSG00000116852	KIF21B
ENSG00000079616.8	ENSG00000079616	KIF22
ENSG00000137807.9	ENSG00000137807	KIF23
ENSG00000186638.11	ENSG00000186638	KIF24
ENSG00000142945.8	ENSG00000142945	KIF2C
ENSG00000131437.11	ENSG00000131437	KIF3A
ENSG00000155980.7	ENSG00000155980	KIF5A
ENSG00000170759.10	ENSG00000170759	KIF5B
ENSG00000168280.12	ENSG00000168280	KIF5C
ENSG00000075945.8	ENSG00000075945	KIFAP3
ENSG00000151657.7	ENSG00000151657	KIN
ENSG00000157404.11	ENSG00000157404	KIT
ENSG00000126214.16	ENSG00000126214	KLC1
ENSG00000155090.10	ENSG00000155090	KLF10
ENSG00000118922.12	ENSG00000118922	KLF12
ENSG00000169926.5	ENSG00000169926	KLF13
ENSG00000067082.10	ENSG00000067082	KLF6
ENSG00000118263.10	ENSG00000118263	KLF7
ENSG00000128607.9	ENSG00000128607	KLHDC10
ENSG00000117153.11	ENSG00000117153	KLHL12
ENSG00000213160.5	ENSG00000213160	KLHL23
ENSG00000114796.11	ENSG00000114796	KLHL24
ENSG00000179454.9	ENSG00000179454	KLHL28
ENSG00000122550.13	ENSG00000122550	KLHL7
ENSG00000227268.3	ENSG00000227268	KLLN
ENSG00000118058.16	ENSG00000118058	KMT2A
ENSG00000055609.13	ENSG00000055609	KMT2C
ENSG00000005483.15	ENSG00000005483	KMT2E
ENSG00000110066.10	ENSG00000110066	KMT5B
ENSG00000184445.7	ENSG00000184445	KNTC1
ENSG00000114030.8	ENSG00000114030	KPNA1
ENSG00000182481.4	ENSG00000182481	KPNA2
ENSG00000196911.5	ENSG00000196911	KPNA5
ENSG00000025800.9	ENSG00000025800	KPNA6
ENSG00000001631.10	ENSG00000001631	KRIT1
ENSG00000111615.8	ENSG00000111615	KRR1
ENSG00000111057.6	ENSG00000111057	KRT18
ENSG00000170421.7	ENSG00000170421	KRT8
ENSG00000105700.6	ENSG00000105700	KXD1
ENSG00000137944.12	ENSG00000137944	KYAT3
ENSG00000246366.2	ENSG00000246366	LACTB2-AS1
ENSG00000167613.11	ENSG00000167613	LAIR1
ENSG00000172037.9	ENSG00000172037	LAMB2
ENSG00000135862.5	ENSG00000135862	LAMC1
ENSG00000005893.11	ENSG00000005893	LAMP2
ENSG00000125869.5	ENSG00000125869	LAMP5
ENSG00000149357.5	ENSG00000149357	LAMTOR1
ENSG00000134248.9	ENSG00000134248	LAMTOR5
ENSG00000115365.7	ENSG00000115365	LANCL1
ENSG00000147036.7	ENSG00000147036	LANCL3
ENSG00000104341.12	ENSG00000104341	LAPTM4B
ENSG00000155506.12	ENSG00000155506	LARP1
ENSG00000138709.13	ENSG00000138709	LARP1B
ENSG00000107929.10	ENSG00000107929	LARP4B
ENSG00000133706.13	ENSG00000133706	LARS
ENSG00000162194.8	ENSG00000162194	LBHD1
ENSG00000143815.10	ENSG00000143815	LBR
ENSG00000135338.9	ENSG00000135338	LCA5
ENSG00000172954.9	ENSG00000172954	LCLAT1
ENSG00000168806.6	ENSG00000168806	LCMT2
ENSG00000196233.7	ENSG00000196233	LCOR
ENSG00000122367.15	ENSG00000122367	LDB3
ENSG00000134333.9	ENSG00000134333	LDHA
ENSG00000111716.8	ENSG00000111716	LDHB
ENSG00000130164.7	ENSG00000130164	LDLR
ENSG00000168924.10	ENSG00000168924	LETM1
ENSG00000108679.8	ENSG00000108679	LGALS3BP
ENSG00000108231.7	ENSG00000108231	LGI1
ENSG00000205213.9	ENSG00000205213	LGR4
ENSG00000139292.8	ENSG00000139292	LGR5
ENSG00000183722.7	ENSG00000183722	LHFPL6
ENSG00000121454.4	ENSG00000121454	LHX4
ENSG00000257935.2	ENSG00000257935	LHX5-AS1
ENSG00000113594.5	ENSG00000113594	LIFR
ENSG00000064042.13	ENSG00000064042	LIMCH1
ENSG00000131914.6	ENSG00000131914	LIN28A
ENSG00000187772.6	ENSG00000187772	LIN28B
ENSG00000111052.3	ENSG00000111052	LIN7A
ENSG00000148943.7	ENSG00000148943	LIN7C
ENSG00000196668.3	ENSG00000196668	LINC00173
ENSG00000232931.1	ENSG00000232931	LINC00342
ENSG00000245526.4	ENSG00000245526	LINC00461
ENSG00000248360.3	ENSG00000248360	LINC00504
ENSG00000203930.6	ENSG00000203930	LINC00632
ENSG00000237945.3	ENSG00000237945	LINC00649
ENSG00000261824.2	ENSG00000261824	LINC00662
ENSG00000254275.2	ENSG00000254275	LINC00824
ENSG00000214145.2	ENSG00000214145	LINC00887
ENSG00000240024.1	ENSG00000240024	LINC00888
ENSG00000263812.1	ENSG00000263812	LINC00908
ENSG00000242086.4	ENSG00000242086	LINC00969
ENSG00000250337.1	ENSG00000250337	LINC01021
ENSG00000232044.4	ENSG00000232044	LINC01105
ENSG00000163364.5	ENSG00000163364	LINC01116
ENSG00000233639.1	ENSG00000233639	LINC01158
ENSG00000269416.1	ENSG00000269416	LINC01224
ENSG00000247157.2	ENSG00000247157	LINC01252
ENSG00000235437.3	ENSG00000235437	LINC01278
ENSG00000253734.1	ENSG00000253734	LINC01289
ENSG00000229891.1	ENSG00000229891	LINC01315
ENSG00000260930.1	ENSG00000260930	LINC01416
ENSG00000186960.6	ENSG00000186960	LINC01551
ENSG00000253103.1	ENSG00000253103	LINC01609
ENSG00000237484.5	ENSG00000237484	LINC01684
ENSG00000236008.1	ENSG00000236008	LINC01814
ENSG00000232164.1	ENSG00000232164	LINC01873
ENSG00000263146.2	ENSG00000263146	LINC01896
ENSG00000254226.1	ENSG00000254226	LINC01933
ENSG00000232233.1	ENSG00000232233	LINC02043
ENSG00000250127.1	ENSG00000250127	LINC02108
ENSG00000249736.1	ENSG00000249736	LINC02242
ENSG00000225930.3	ENSG00000225930	LINC02249
ENSG00000248510.2	ENSG00000248510	LINC02267
ENSG00000250742.1	ENSG00000250742	LINC02381
ENSG00000258123.1	ENSG00000258123	LINC02444
ENSG00000249614.1	ENSG00000249614	LINC02503
ENSG00000107798.13	ENSG00000107798	LIPA
ENSG00000101670.7	ENSG00000101670	LIPG
ENSG00000189067.8	ENSG00000189067	LITAF
ENSG00000145721.7	ENSG00000145721	LIX1
ENSG00000169223.10	ENSG00000169223	LMAN2
ENSG00000071282.7	ENSG00000071282	LMCD1
ENSG00000048540.10	ENSG00000048540	LMO3
ENSG00000144320.9	ENSG00000144320	LNPK
ENSG00000196365.7	ENSG00000196365	LONP1
ENSG00000154359.8	ENSG00000154359	LONRF1
ENSG00000115318.7	ENSG00000115318	LOXL3
ENSG00000123684.8	ENSG00000123684	LPGAT1
ENSG00000132793.7	ENSG00000132793	LPIN3
ENSG00000175445.10	ENSG00000175445	LPL
ENSG00000145012.8	ENSG00000145012	LPP
ENSG00000186001.8	ENSG00000186001	LRCH3
ENSG00000144749.9	ENSG00000144749	LRIG1
ENSG00000198799.7	ENSG00000198799	LRIG2
ENSG00000139263.7	ENSG00000139263	LRIG3
ENSG00000120256.5	ENSG00000120256	LRP11
ENSG00000081479.8	ENSG00000081479	LRP2
ENSG00000134569.5	ENSG00000134569	LRP4
ENSG00000070018.4	ENSG00000070018	LRP6
ENSG00000157193.10	ENSG00000157193	LRP8
ENSG00000163956.6	ENSG00000163956	LRPAP1
ENSG00000138095.14	ENSG00000138095	LRPPRC
ENSG00000165501.12	ENSG00000165501	LRR1
ENSG00000137269.10	ENSG00000137269	LRRC1
ENSG00000184434.7	ENSG00000184434	LRRC19
ENSG00000168904.10	ENSG00000168904	LRRC28
ENSG00000176681.10	ENSG00000176681	LRRC37A
ENSG00000267023.1	ENSG00000267023	LRRC37A16P
ENSG00000238083.3	ENSG00000238083	LRRC37A2
ENSG00000128594.3	ENSG00000128594	LRRC4
ENSG00000137821.7	ENSG00000137821	LRRC49
ENSG00000163428.3	ENSG00000163428	LRRC58
ENSG00000108829.9	ENSG00000108829	LRRC59
ENSG00000033122.14	ENSG00000033122	LRRC7
ENSG00000175061.13	ENSG00000175061	LRRC75A-AS1
ENSG00000136802.7	ENSG00000136802	LRRC8A
ENSG00000197147.8	ENSG00000197147	LRRC8B
ENSG00000175928.5	ENSG00000175928	LRRN1
ENSG00000173114.8	ENSG00000173114	LRRN3
ENSG00000146006.7	ENSG00000146006	LRRTM2
ENSG00000185565.7	ENSG00000185565	LSAMP
ENSG00000161654.5	ENSG00000161654	LSM12
ENSG00000204392.6	ENSG00000204392	LSM2
ENSG00000170860.3	ENSG00000170860	LSM3
ENSG00000130520.6	ENSG00000130520	LSM4
ENSG00000106355.5	ENSG00000106355	LSM5
ENSG00000130332.10	ENSG00000130332	LSM7
ENSG00000160285.10	ENSG00000160285	LSS
ENSG00000198862.9	ENSG00000198862	LTN1
ENSG00000135521.8	ENSG00000135521	LTV1
ENSG00000007392.12	ENSG00000007392	LUC7L
ENSG00000108848.11	ENSG00000108848	LUC7L3
ENSG00000139329.4	ENSG00000139329	LUM
ENSG00000187398.7	ENSG00000187398	LUZP2
ENSG00000145220.9	ENSG00000145220	LYAR
ENSG00000185674.5	ENSG00000185674	LYG2
ENSG00000187123.10	ENSG00000187123	LYPD6
ENSG00000120992.13	ENSG00000120992	LYPLA1
ENSG00000011009.6	ENSG00000011009	LYPLA2
ENSG00000186687.11	ENSG00000186687	LYRM7
ENSG00000163155.7	ENSG00000163155	LYSMD1
ENSG00000162441.7	ENSG00000162441	LZIC
ENSG00000173212.4	ENSG00000173212	MAB21L3
ENSG00000127603.19	ENSG00000127603	MACF1
ENSG00000002822.11	ENSG00000002822	MAD1L1
ENSG00000164109.9	ENSG00000164109	MAD2L1
ENSG00000116670.10	ENSG00000116670	MAD2L2
ENSG00000178573.6	ENSG00000178573	MAF
ENSG00000179222.13	ENSG00000179222	MAGED1
ENSG00000102316.12	ENSG00000102316	MAGED2
ENSG00000154545.12	ENSG00000154545	MAGED4
ENSG00000198934.3	ENSG00000198934	MAGEE1
ENSG00000151276.19	ENSG00000151276	MAGI1
ENSG00000081026.14	ENSG00000081026	MAGI3
ENSG00000111196.5	ENSG00000111196	MAGOHB
ENSG00000102158.15	ENSG00000102158	MAGT1
ENSG00000198042.6	ENSG00000198042	MAK16
ENSG00000251562.3	ENSG00000251562	MALAT1
ENSG00000172175.8	ENSG00000172175	MALT1
ENSG00000198162.8	ENSG00000198162	MAN1A2
ENSG00000109323.4	ENSG00000109323	MANBA
ENSG00000172469.10	ENSG00000172469	MANEA
ENSG00000166963.8	ENSG00000166963	MAP1A
ENSG00000131711.10	ENSG00000131711	MAP1B
ENSG00000078018.15	ENSG00000078018	MAP2
ENSG00000073803.9	ENSG00000073803	MAP3K13
ENSG00000169967.12	ENSG00000169967	MAP3K2
ENSG00000047849.17	ENSG00000047849	MAP4
ENSG00000012983.7	ENSG00000012983	MAP4K5
ENSG00000171533.7	ENSG00000171533	MAP6
ENSG00000164114.14	ENSG00000164114	MAP9
ENSG00000100030.10	ENSG00000100030	MAPK1
ENSG00000109339.14	ENSG00000109339	MAPK10
ENSG00000188130.9	ENSG00000188130	MAPK12
ENSG00000168175.10	ENSG00000168175	MAPK1IP1L
ENSG00000175130.6	ENSG00000175130	MARCKSL1
ENSG00000166783.15	ENSG00000166783	MARF1
ENSG00000116141.11	ENSG00000116141	MARK1
ENSG00000075413.13	ENSG00000075413	MARK3
ENSG00000127241.12	ENSG00000127241	MASP1
ENSG00000168906.8	ENSG00000168906	MAT2A
ENSG00000015479.13	ENSG00000015479	MATR3
ENSG00000071655.13	ENSG00000071655	MBD3
ENSG00000129071.5	ENSG00000129071	MBD4
ENSG00000151332.14	ENSG00000151332	MBIP
ENSG00000172197.9	ENSG00000172197	MBOAT1
ENSG00000143797.7	ENSG00000143797	MBOAT2
ENSG00000140943.12	ENSG00000140943	MBTPS1
ENSG00000065328.12	ENSG00000065328	MCM10
ENSG00000073111.9	ENSG00000073111	MCM2
ENSG00000112118.13	ENSG00000112118	MCM3
ENSG00000104738.12	ENSG00000104738	MCM4
ENSG00000100297.11	ENSG00000100297	MCM5
ENSG00000076003.4	ENSG00000076003	MCM6
ENSG00000166508.13	ENSG00000166508	MCM7
ENSG00000111877.13	ENSG00000111877	MCM9
ENSG00000197771.8	ENSG00000197771	MCMBP
ENSG00000187778.9	ENSG00000187778	MCRS1
ENSG00000135272.5	ENSG00000135272	MDFIC
ENSG00000146701.7	ENSG00000146701	MDH2
ENSG00000110492.11	ENSG00000110492	MDK
ENSG00000135679.17	ENSG00000135679	MDM2
ENSG00000198625.8	ENSG00000198625	MDM4
ENSG00000112159.7	ENSG00000112159	MDN1
ENSG00000124733.3	ENSG00000124733	MEA1
ENSG00000163875.11	ENSG00000163875	MEAF6
ENSG00000123066.3	ENSG00000123066	MED13L
ENSG00000124641.10	ENSG00000124641	MED20
ENSG00000112282.13	ENSG00000112282	MED23
ENSG00000145794.12	ENSG00000145794	MEGF10
ENSG00000106780.7	ENSG00000106780	MEGF9
ENSG00000143995.15	ENSG00000143995	MEIS1
ENSG00000134138.15	ENSG00000134138	MEIS2
ENSG00000165304.3	ENSG00000165304	MELK
ENSG00000162959.9	ENSG00000162959	MEMO1
ENSG00000117899.6	ENSG00000117899	MESD
ENSG00000106484.10	ENSG00000106484	MEST
ENSG00000037897.12	ENSG00000037897	METTL1
ENSG00000144401.10	ENSG00000144401	METTL21A
ENSG00000087995.11	ENSG00000087995	METTL2A
ENSG00000197006.9	ENSG00000197006	METTL9
ENSG00000254726.2	ENSG00000254726	MEX3A
ENSG00000181588.15	ENSG00000181588	MEX3D
ENSG00000117122.9	ENSG00000117122	MFAP2
ENSG00000171109.14	ENSG00000171109	MFN1
ENSG00000182544.8	ENSG00000182544	MFSD5
ENSG00000198408.9	ENSG00000198408	MGEA5
ENSG00000170430.9	ENSG00000170430	MGMT
ENSG00000008394.8	ENSG00000008394	MGST1
ENSG00000143198.8	ENSG00000143198	MGST3
ENSG00000225783.2	ENSG00000225783	MIAT
ENSG00000101752.7	ENSG00000101752	MIB1
ENSG00000204520.8	ENSG00000204520	MICA
ENSG00000101871.10	ENSG00000101871	MID1
ENSG00000198160.10	ENSG00000198160	MIER1
ENSG00000218537.1	ENSG00000218537	MIF-AS1
ENSG00000128923.6	ENSG00000128923	MINDY2
ENSG00000148481.9	ENSG00000148481	MINDY3
ENSG00000151338.14	ENSG00000151338	MIPOL1
ENSG00000255248.2	ENSG00000255248	MIR100HG
ENSG00000254377.1	ENSG00000254377	MIR124-2HG
ENSG00000215417.6	ENSG00000215417	MIR17HG
ENSG00000229989.3	ENSG00000229989	MIR181A1HG
ENSG00000215386.6	ENSG00000215386	MIR99AHG
ENSG00000197182.8	ENSG00000197182	MIRLET7BHG
ENSG00000159055.3	ENSG00000159055	MIS18A
ENSG00000148773.8	ENSG00000148773	MKI67
ENSG00000128585.13	ENSG00000128585	MKLN1
ENSG00000133606.6	ENSG00000133606	MKRN1
ENSG00000179455.6	ENSG00000179455	MKRN3
ENSG00000178053.13	ENSG00000178053	MLF1
ENSG00000119684.11	ENSG00000119684	MLH3
ENSG00000078403.12	ENSG00000078403	MLLT10
ENSG00000213190.2	ENSG00000213190	MLLT11
ENSG00000171843.11	ENSG00000171843	MLLT3
ENSG00000167965.13	ENSG00000167965	MLST8
ENSG00000108788.7	ENSG00000108788	MLX
ENSG00000156103.11	ENSG00000156103	MMP16
ENSG00000087245.8	ENSG00000087245	MMP2
ENSG00000138722.5	ENSG00000138722	MMRN1
ENSG00000146263.7	ENSG00000146263	MMS22L
ENSG00000020426.6	ENSG00000020426	MNAT1
ENSG00000121211.3	ENSG00000121211	MND1
ENSG00000114978.13	ENSG00000114978	MOB1A
ENSG00000173542.4	ENSG00000173542	MOB1B
ENSG00000172081.9	ENSG00000172081	MOB3A
ENSG00000120162.9	ENSG00000120162	MOB3B
ENSG00000115540.10	ENSG00000115540	MOB4
ENSG00000061987.10	ENSG00000061987	MON2
ENSG00000159256.8	ENSG00000159256	MORC3
ENSG00000133131.10	ENSG00000133131	MORC4
ENSG00000185787.10	ENSG00000185787	MORF4L1
ENSG00000123562.12	ENSG00000123562	MORF4L2
ENSG00000171160.13	ENSG00000171160	MORN4
ENSG00000079931.10	ENSG00000079931	MOXD1
ENSG00000143158.6	ENSG00000143158	MPC2
ENSG00000107186.12	ENSG00000107186	MPDZ
ENSG00000051825.10	ENSG00000051825	MPHOSPH9
ENSG00000105926.11	ENSG00000105926	MPP6
ENSG00000225442.2	ENSG00000225442	MPRIP-AS1
ENSG00000179010.10	ENSG00000179010	MRFAP1
ENSG00000122687.13	ENSG00000122687	MRM2
ENSG00000171861.6	ENSG00000171861	MRM3
ENSG00000161010.10	ENSG00000161010	MRNIP
ENSG00000169288.13	ENSG00000169288	MRPL1
ENSG00000174547.9	ENSG00000174547	MRPL11
ENSG00000172172.3	ENSG00000172172	MRPL13
ENSG00000180992.5	ENSG00000180992	MRPL14
ENSG00000166902.4	ENSG00000166902	MRPL16
ENSG00000242485.1	ENSG00000242485	MRPL20
ENSG00000197345.8	ENSG00000197345	MRPL21
ENSG00000130312.2	ENSG00000130312	MRPL34
ENSG00000171421.8	ENSG00000171421	MRPL36
ENSG00000116221.11	ENSG00000116221	MRPL37
ENSG00000154719.9	ENSG00000154719	MRPL39
ENSG00000198015.8	ENSG00000198015	MRPL42
ENSG00000136522.9	ENSG00000136522	MRPL47
ENSG00000111639.3	ENSG00000111639	MRPL51
ENSG00000162910.14	ENSG00000162910	MRPL55
ENSG00000173141.4	ENSG00000173141	MRPL57
ENSG00000167862.5	ENSG00000167862	MRPL58
ENSG00000048544.5	ENSG00000048544	MRPS10
ENSG00000128626.7	ENSG00000128626	MRPS12
ENSG00000116898.7	ENSG00000116898	MRPS15
ENSG00000182180.9	ENSG00000182180	MRPS16
ENSG00000096080.7	ENSG00000096080	MRPS18A
ENSG00000090263.11	ENSG00000090263	MRPS33
ENSG00000243927.1	ENSG00000243927	MRPS6
ENSG00000125445.6	ENSG00000125445	MRPS7
ENSG00000053372.4	ENSG00000053372	MRTO4
ENSG00000135097.2	ENSG00000135097	MSI1
ENSG00000153944.6	ENSG00000153944	MSI2
ENSG00000188895.7	ENSG00000188895	MSL1
ENSG00000052802.8	ENSG00000052802	MSMO1
ENSG00000147065.12	ENSG00000147065	MSN
ENSG00000198736.7	ENSG00000198736	MSRB1
ENSG00000163132.6	ENSG00000163132	MSX1
ENSG00000120149.7	ENSG00000120149	MSX2
ENSG00000198899.2	ENSG00000198899	MT-ATP6
ENSG00000168502.13	ENSG00000168502	MTCL1
ENSG00000237973.1	ENSG00000237973	MTCO1P12
ENSG00000198712.1	ENSG00000198712	MT-CO2
ENSG00000198938.2	ENSG00000198938	MT-CO3
ENSG00000198744.5	ENSG00000198744	MTCO3P12
ENSG00000198727.2	ENSG00000198727	MT-CYB
ENSG00000156469.4	ENSG00000156469	MTERF3
ENSG00000143033.13	ENSG00000143033	MTF2
ENSG00000103707.5	ENSG00000103707	MTFMT
ENSG00000065911.7	ENSG00000065911	MTHFD2
ENSG00000139505.10	ENSG00000139505	MTMR6
ENSG00000003987.9	ENSG00000003987	MTMR7
ENSG00000198888.2	ENSG00000198888	MT-ND1
ENSG00000198763.3	ENSG00000198763	MT-ND2
ENSG00000225630.1	ENSG00000225630	MTND2P28
ENSG00000198886.2	ENSG00000198886	MT-ND4
ENSG00000212907.2	ENSG00000212907	MT-ND4L
ENSG00000247627.2	ENSG00000247627	MTND4P12
ENSG00000198786.2	ENSG00000198786	MT-ND5
ENSG00000198695.2	ENSG00000198695	MT-ND6
ENSG00000249119.1	ENSG00000249119	MTND6P4
ENSG00000198793.8	ENSG00000198793	MTOR
ENSG00000107951.8	ENSG00000107951	MTPAP
ENSG00000105887.10	ENSG00000105887	MTPN
ENSG00000211459.2	ENSG00000211459	MT-RNR1
ENSG00000256618.1	ENSG00000256618	MTRNR2L1
ENSG00000269028.2	ENSG00000269028	MTRNR2L12
ENSG00000271043.1	ENSG00000271043	MTRNR2L2
ENSG00000255823.1	ENSG00000255823	MTRNR2L8
ENSG00000255633.3	ENSG00000255633	MTRNR2L9
ENSG00000124275.10	ENSG00000124275	MTRR
ENSG00000138823.8	ENSG00000138823	MTTP
ENSG00000129422.9	ENSG00000129422	MTUS1
ENSG00000236675.1	ENSG00000236675	MTX1P1
ENSG00000160953.10	ENSG00000160953	MUM1
ENSG00000059728.6	ENSG00000059728	MXD1
ENSG00000119950.16	ENSG00000119950	MXI1
ENSG00000179820.11	ENSG00000179820	MYADM
ENSG00000101057.11	ENSG00000101057	MYBL2
ENSG00000136997.10	ENSG00000136997	MYC
ENSG00000214114.4	ENSG00000214114	MYCBP
ENSG00000005810.13	ENSG00000005810	MYCBP2
ENSG00000116990.9	ENSG00000116990	MYCL
ENSG00000134323.10	ENSG00000134323	MYCN
ENSG00000172936.8	ENSG00000172936	MYD88
ENSG00000104177.13	ENSG00000104177	MYEF2
ENSG00000133026.8	ENSG00000133026	MYH10
ENSG00000100345.16	ENSG00000100345	MYH9
ENSG00000101608.8	ENSG00000101608	MYL12A
ENSG00000092841.14	ENSG00000092841	MYL6
ENSG00000145555.10	ENSG00000145555	MYO10
ENSG00000128833.8	ENSG00000128833	MYO5C
ENSG00000196586.9	ENSG00000196586	MYO6
ENSG00000066933.11	ENSG00000066933	MYO9A
ENSG00000162601.5	ENSG00000162601	MYSM1
ENSG00000204899.5	ENSG00000204899	MZT1
ENSG00000244754.4	ENSG00000244754	N4BP2L2
ENSG00000102030.11	ENSG00000102030	NAA10
ENSG00000164134.8	ENSG00000164134	NAA15
ENSG00000172766.14	ENSG00000172766	NAA16
ENSG00000111300.5	ENSG00000111300	NAA25
ENSG00000121579.8	ENSG00000121579	NAA50
ENSG00000077616.6	ENSG00000077616	NAALAD2
ENSG00000173559.8	ENSG00000173559	NABP1
ENSG00000196531.6	ENSG00000196531	NACA
ENSG00000152620.8	ENSG00000152620	NADK2
ENSG00000159593.10	ENSG00000159593	NAE1
ENSG00000249437.3	ENSG00000249437	NAIP
ENSG00000187109.9	ENSG00000187109	NAP1L1
ENSG00000141562.13	ENSG00000141562	NARF
ENSG00000132780.12	ENSG00000132780	NASP
ENSG00000134369.11	ENSG00000134369	NAV1
ENSG00000166833.15	ENSG00000166833	NAV2
ENSG00000067798.9	ENSG00000067798	NAV3
ENSG00000163382.7	ENSG00000163382	NAXE
ENSG00000151779.8	ENSG00000151779	NBAS
ENSG00000260455.1	ENSG00000260455	NBAT1
ENSG00000172915.14	ENSG00000172915	NBEA
ENSG00000219481.6	ENSG00000219481	NBPF1
ENSG00000162825.12	ENSG00000162825	NBPF20
ENSG00000188554.9	ENSG00000188554	NBR1
ENSG00000104490.13	ENSG00000104490	NCALD
ENSG00000149294.12	ENSG00000149294	NCAM1
ENSG00000010292.8	ENSG00000010292	NCAPD2
ENSG00000109805.5	ENSG00000109805	NCAPG
ENSG00000121152.5	ENSG00000121152	NCAPH
ENSG00000061676.10	ENSG00000061676	NCKAP1
ENSG00000115053.11	ENSG00000115053	NCL
ENSG00000084676.11	ENSG00000084676	NCOA1
ENSG00000124151.14	ENSG00000124151	NCOA3
ENSG00000124160.7	ENSG00000124160	NCOA5
ENSG00000141027.16	ENSG00000141027	NCOR1
ENSG00000072864.8	ENSG00000072864	NDE1
ENSG00000131507.9	ENSG00000131507	NDFIP1
ENSG00000102471.9	ENSG00000102471	NDFIP2
ENSG00000173376.9	ENSG00000173376	NDNF
ENSG00000103034.10	ENSG00000103034	NDRG4
ENSG00000184752.8	ENSG00000184752	NDUFA12
ENSG00000189043.5	ENSG00000189043	NDUFA4
ENSG00000128609.10	ENSG00000128609	NDUFA5
ENSG00000004779.5	ENSG00000004779	NDUFAB1
ENSG00000164182.6	ENSG00000164182	NDUFAF2
ENSG00000178057.10	ENSG00000178057	NDUFAF3
ENSG00000123545.5	ENSG00000123545	NDUFAF4
ENSG00000140990.10	ENSG00000140990	NDUFB10
ENSG00000147123.10	ENSG00000147123	NDUFB11
ENSG00000065518.7	ENSG00000065518	NDUFB4
ENSG00000165264.6	ENSG00000165264	NDUFB6
ENSG00000166136.11	ENSG00000166136	NDUFB8
ENSG00000213619.5	ENSG00000213619	NDUFS3
ENSG00000164258.7	ENSG00000164258	NDUFS4
ENSG00000168653.6	ENSG00000168653	NDUFS5
ENSG00000145494.7	ENSG00000145494	NDUFS6
ENSG00000178127.8	ENSG00000178127	NDUFV2
ENSG00000267809.1	ENSG00000267809	NDUFV2P1
ENSG00000160194.13	ENSG00000160194	NDUFV3
ENSG00000245532.4	ENSG00000245532	NEAT1
ENSG00000078114.14	ENSG00000078114	NEBL
ENSG00000123119.7	ENSG00000123119	NECAB1
ENSG00000089818.12	ENSG00000089818	NECAP1
ENSG00000069869.11	ENSG00000069869	NEDD4
ENSG00000049759.12	ENSG00000049759	NEDD4L
ENSG00000111859.12	ENSG00000111859	NEDD9
ENSG00000100285.9	ENSG00000100285	NEFH
ENSG00000104722.9	ENSG00000104722	NEFM
ENSG00000154328.11	ENSG00000154328	NEIL2
ENSG00000137601.11	ENSG00000137601	NEK1
ENSG00000117650.8	ENSG00000117650	NEK2
ENSG00000101158.8	ENSG00000101158	NELFCD
ENSG00000165525.13	ENSG00000165525	NEMF
ENSG00000067141.12	ENSG00000067141	NEO1
ENSG00000163608.10	ENSG00000163608	NEPRO
ENSG00000132688.10	ENSG00000132688	NES
ENSG00000171208.5	ENSG00000171208	NETO2
ENSG00000204386.6	ENSG00000204386	NEU1
ENSG00000123307.3	ENSG00000123307	NEUROD4
ENSG00000162614.14	ENSG00000162614	NEXN
ENSG00000196712.12	ENSG00000196712	NF1
ENSG00000186575.13	ENSG00000186575	NF2
ENSG00000116044.11	ENSG00000116044	NFE2L2
ENSG00000050344.8	ENSG00000050344	NFE2L3
ENSG00000162599.11	ENSG00000162599	NFIA
ENSG00000147862.10	ENSG00000147862	NFIB
ENSG00000129460.11	ENSG00000129460	NGDN
ENSG00000171786.5	ENSG00000171786	NHLH1
ENSG00000177551.5	ENSG00000177551	NHLH2
ENSG00000196865.4	ENSG00000196865	NHLRC2
ENSG00000135540.7	ENSG00000135540	NHSL1
ENSG00000116962.10	ENSG00000116962	NID1
ENSG00000087303.12	ENSG00000087303	NID2
ENSG00000100503.19	ENSG00000100503	NIN
ENSG00000101004.10	ENSG00000101004	NINL
ENSG00000132603.9	ENSG00000132603	NIP7
ENSG00000164190.12	ENSG00000164190	NIPBL
ENSG00000136783.9	ENSG00000136783	NIPSNAP3A
ENSG00000186416.8	ENSG00000186416	NKRF
ENSG00000114857.13	ENSG00000114857	NKTR
ENSG00000169251.8	ENSG00000169251	NMD3
ENSG00000239672.3	ENSG00000239672	NME1
ENSG00000243678.7	ENSG00000243678	NME2
ENSG00000157064.6	ENSG00000157064	NMNAT2
ENSG00000153406.9	ENSG00000153406	NMRAL1
ENSG00000112992.12	ENSG00000112992	NNT
ENSG00000248092.3	ENSG00000248092	NNT-AS1
ENSG00000151014.4	ENSG00000151014	NOCT
ENSG00000183691.4	ENSG00000183691	NOG
[truncated: 1,988 more rows]

## Sheet: Table_S4
528 genes
gencode_id	ensembl_gene_id	Lastest version of gene symbol (from HGNC database)
ENSG00000003987.9	ENSG00000003987	MTMR7
ENSG00000004534.10	ENSG00000004534	RBM6
ENSG00000005022.5	ENSG00000005022	SLC25A5
ENSG00000005108.11	ENSG00000005108	THSD7A
ENSG00000007372.16	ENSG00000007372	PAX6
ENSG00000007384.11	ENSG00000007384	RHBDF1
ENSG00000008196.8	ENSG00000008196	TFAP2B
ENSG00000008294.16	ENSG00000008294	SPAG9
ENSG00000009709.7	ENSG00000009709	PAX7
ENSG00000015532.5	ENSG00000015532	XYLT2
ENSG00000015568.8	ENSG00000015568	RGPD5
ENSG00000015592.12	ENSG00000015592	STMN4
ENSG00000018189.8	ENSG00000018189	RUFY3
ENSG00000018625.10	ENSG00000018625	ATP1A2
ENSG00000019582.10	ENSG00000019582	CD74
ENSG00000023287.8	ENSG00000023287	RB1CC1
ENSG00000026025.9	ENSG00000026025	VIM
ENSG00000028277.16	ENSG00000028277	POU2F2
ENSG00000033178.8	ENSG00000033178	UBA6
ENSG00000033800.9	ENSG00000033800	PIAS1
ENSG00000036565.10	ENSG00000036565	SLC18A1
ENSG00000037897.12	ENSG00000037897	METTL1
ENSG00000041982.10	ENSG00000041982	TNC
ENSG00000044524.6	ENSG00000044524	EPHA3
ENSG00000046653.10	ENSG00000046653	GPM6B
ENSG00000052802.8	ENSG00000052802	MSMO1
ENSG00000054793.9	ENSG00000054793	ATP9A
ENSG00000055609.13	ENSG00000055609	KMT2C
ENSG00000058668.10	ENSG00000058668	ATP2B4
ENSG00000059804.11	ENSG00000059804	SLC2A3
ENSG00000064042.13	ENSG00000064042	LIMCH1
ENSG00000064309.10	ENSG00000064309	CDON
ENSG00000065518.7	ENSG00000065518	NDUFB4
ENSG00000065911.7	ENSG00000065911	MTHFD2
ENSG00000066468.16	ENSG00000066468	FGFR2
ENSG00000066583.7	ENSG00000066583	ISOC1
ENSG00000067064.6	ENSG00000067064	IDI1
ENSG00000067533.5	ENSG00000067533	RRP15
ENSG00000067798.9	ENSG00000067798	NAV3
ENSG00000069431.6	ENSG00000069431	ABCC9
ENSG00000069869.11	ENSG00000069869	NEDD4
ENSG00000070831.11	ENSG00000070831	CDC42
ENSG00000074755.10	ENSG00000074755	ZZEF1
ENSG00000074800.9	ENSG00000074800	ENO1
ENSG00000075292.14	ENSG00000075292	ZNF638
ENSG00000075624.9	ENSG00000075624	ACTB
ENSG00000076356.6	ENSG00000076356	PLXNA2
ENSG00000077092.14	ENSG00000077092	RARB
ENSG00000077097.9	ENSG00000077097	TOP2B
ENSG00000077264.10	ENSG00000077264	PAK3
ENSG00000077279.12	ENSG00000077279	DCX
ENSG00000078018.15	ENSG00000078018	MAP2
ENSG00000078114.14	ENSG00000078114	NEBL
ENSG00000078549.10	ENSG00000078549	ADCYAP1R1
ENSG00000079102.12	ENSG00000079102	RUNX1T1
ENSG00000079332.10	ENSG00000079332	SAR1A
ENSG00000079459.8	ENSG00000079459	FDFT1
ENSG00000079482.11	ENSG00000079482	OPHN1
ENSG00000079691.15	ENSG00000079691	CARMIL1
ENSG00000079931.10	ENSG00000079931	MOXD1
ENSG00000080298.11	ENSG00000080298	RFX3
ENSG00000084444.9	ENSG00000084444	FAM234B
ENSG00000085365.13	ENSG00000085365	SCAMP1
ENSG00000085733.11	ENSG00000085733	CTTN
ENSG00000086062.8	ENSG00000086062	B4GALT1
ENSG00000087245.8	ENSG00000087245	MMP2
ENSG00000088448.10	ENSG00000088448	ANKRD10
ENSG00000091656.11	ENSG00000091656	ZFHX4
ENSG00000092847.6	ENSG00000092847	AGO1
ENSG00000094916.9	ENSG00000094916	CBX5
ENSG00000096696.9	ENSG00000096696	DSP
ENSG00000099194.5	ENSG00000099194	SCD
ENSG00000100592.11	ENSG00000100592	DAAM1
ENSG00000101126.11	ENSG00000101126	ADNP
ENSG00000101384.7	ENSG00000101384	JAG1
ENSG00000101871.10	ENSG00000101871	MID1
ENSG00000101911.8	ENSG00000101911	PRPS2
ENSG00000102144.9	ENSG00000102144	PGK1
ENSG00000102580.10	ENSG00000102580	DNAJC3
ENSG00000102898.7	ENSG00000102898	NUTF2
ENSG00000103460.12	ENSG00000103460	TOX3
ENSG00000103657.9	ENSG00000103657	HERC1
ENSG00000104164.6	ENSG00000104164	BLOC1S6
ENSG00000104177.13	ENSG00000104177	MYEF2
ENSG00000104332.7	ENSG00000104332	SFRP1
ENSG00000104427.7	ENSG00000104427	ZC2HC1A
ENSG00000104435.9	ENSG00000104435	STMN2
ENSG00000104447.7	ENSG00000104447	TRPS1
ENSG00000104738.12	ENSG00000104738	MCM4
ENSG00000104765.10	ENSG00000104765
ENSG00000105220.10	ENSG00000105220	GPI
ENSG00000105426.10	ENSG00000105426	PTPRS
ENSG00000105855.5	ENSG00000105855	ITGB8
ENSG00000105997.18	ENSG00000105997	HOXA3
ENSG00000106004.4	ENSG00000106004	HOXA5
ENSG00000106144.15	ENSG00000106144	CASP2
ENSG00000106261.12	ENSG00000106261	ZKSCAN1
ENSG00000106341.6	ENSG00000106341	PPP1R17
ENSG00000106565.13	ENSG00000106565	TMEM176B
ENSG00000107242.13	ENSG00000107242	PIP5K1B
ENSG00000107863.12	ENSG00000107863	ARHGAP21
ENSG00000108231.7	ENSG00000108231	LGI1
ENSG00000108953.12	ENSG00000108953	YWHAE
ENSG00000109046.10	ENSG00000109046	WSB1
ENSG00000109107.9	ENSG00000109107	ALDOC
ENSG00000109133.8	ENSG00000109133	TMEM33
ENSG00000109339.14	ENSG00000109339	MAPK10
ENSG00000110042.3	ENSG00000110042	DTX4
ENSG00000110436.7	ENSG00000110436	SLC1A2
ENSG00000110492.11	ENSG00000110492	MDK
ENSG00000110660.10	ENSG00000110660	SLC35F2
ENSG00000111057.6	ENSG00000111057	KRT18
ENSG00000111669.10	ENSG00000111669	TPI1
ENSG00000111674.4	ENSG00000111674	ENO2
ENSG00000111696.7	ENSG00000111696	NT5DC3
ENSG00000111859.12	ENSG00000111859	NEDD9
ENSG00000111860.9	ENSG00000111860	CEP85L
ENSG00000112081.12	ENSG00000112081	SRSF3
ENSG00000112096.12	ENSG00000112096	SOD2
ENSG00000112118.13	ENSG00000112118	MCM3
ENSG00000112902.7	ENSG00000112902	SEMA5A
ENSG00000112972.10	ENSG00000112972	HMGCS1
ENSG00000112983.13	ENSG00000112983	BRD8
ENSG00000113140.6	ENSG00000113140	SPARC
ENSG00000113161.11	ENSG00000113161	HMGCR
ENSG00000113361.8	ENSG00000113361	CDH6
ENSG00000113369.4	ENSG00000113369	ARRDC3
ENSG00000113569.11	ENSG00000113569	NUP155
ENSG00000113594.5	ENSG00000113594	LIFR
ENSG00000114023.11	ENSG00000114023	FAM162A
ENSG00000114115.5	ENSG00000114115	RBP1
ENSG00000114120.7	ENSG00000114120	SLC25A36
ENSG00000114127.6	ENSG00000114127	XRN1
ENSG00000114251.9	ENSG00000114251	WNT5A
ENSG00000114439.14	ENSG00000114439	BBX
ENSG00000114529.8	ENSG00000114529	C3orf52
ENSG00000114784.3	ENSG00000114784	EIF1B
ENSG00000114796.11	ENSG00000114796	KLHL24
ENSG00000114857.13	ENSG00000114857	NKTR
ENSG00000115252.14	ENSG00000115252	PDE1A
ENSG00000115310.13	ENSG00000115310	RTN4
ENSG00000115461.4	ENSG00000115461	IGFBP5
ENSG00000115548.12	ENSG00000115548	KDM3A
ENSG00000115947.9	ENSG00000115947	ORC4
ENSG00000115963.9	ENSG00000115963	RND3
ENSG00000116489.8	ENSG00000116489	CAPZA1
ENSG00000116539.6	ENSG00000116539	ASH1L
ENSG00000116747.8	ENSG00000116747	TROVE2
ENSG00000117020.12	ENSG00000117020	AKT3
ENSG00000117114.15	ENSG00000117114	ADGRL2
ENSG00000117289.7	ENSG00000117289
ENSG00000117335.14	ENSG00000117335	CD46
ENSG00000117525.9	ENSG00000117525	F3
ENSG00000117632.16	ENSG00000117632	STMN1
ENSG00000117724.8	ENSG00000117724	CENPF
ENSG00000118263.10	ENSG00000118263	KLF7
ENSG00000118473.17	ENSG00000118473	SGIP1
ENSG00000118523.5	ENSG00000118523	CTGF
ENSG00000118816.5	ENSG00000118816	CCNI
ENSG00000118946.7	ENSG00000118946	PCDH17
ENSG00000119335.12	ENSG00000119335	SET
ENSG00000119707.9	ENSG00000119707	RBM25
ENSG00000119866.16	ENSG00000119866	BCL11A
ENSG00000120149.7	ENSG00000120149	MSX2
ENSG00000120251.14	ENSG00000120251	GRIA2
ENSG00000120708.12	ENSG00000120708	TGFBI
ENSG00000121966.6	ENSG00000121966	CXCR4
ENSG00000122367.15	ENSG00000122367	LDB3
ENSG00000122644.8	ENSG00000122644	ARL4A
ENSG00000122884.8	ENSG00000122884	P4HA1
ENSG00000122952.12	ENSG00000122952	ZWINT
ENSG00000123307.3	ENSG00000123307	NEUROD4
ENSG00000123560.9	ENSG00000123560	PLP1
ENSG00000123636.13	ENSG00000123636	BAZ2B
ENSG00000123892.7	ENSG00000123892	RAB38
ENSG00000124193.10	ENSG00000124193	SRSF6
ENSG00000124422.7	ENSG00000124422	USP22
ENSG00000124766.4	ENSG00000124766	SOX4
ENSG00000125398.5	ENSG00000125398	SOX9
ENSG00000125430.4	ENSG00000125430	HS3ST3B1
ENSG00000125462.12	ENSG00000125462	C1orf61
ENSG00000125629.10	ENSG00000125629	INSIG2
ENSG00000125851.5	ENSG00000125851	PCSK2
ENSG00000125869.5	ENSG00000125869	LAMP5
ENSG00000127241.12	ENSG00000127241	MASP1
ENSG00000127423.6	ENSG00000127423	AUNIP
ENSG00000127884.4	ENSG00000127884	ECHS1
ENSG00000127914.12	ENSG00000127914	AKAP9
ENSG00000128652.7	ENSG00000128652	HOXD3
ENSG00000128683.9	ENSG00000128683	GAD1
ENSG00000128923.6	ENSG00000128923	MINDY2
ENSG00000129219.9	ENSG00000129219	PLD2
ENSG00000129244.4	ENSG00000129244	ATP1B2
ENSG00000129422.9	ENSG00000129422	MTUS1
ENSG00000129757.8	ENSG00000129757	CDKN1C
ENSG00000130066.12	ENSG00000130066	SAT1
ENSG00000130164.7	ENSG00000130164	LDLR
ENSG00000130309.6	ENSG00000130309	COLGALT1
ENSG00000130706.8	ENSG00000130706	ADRM1
ENSG00000130741.6	ENSG00000130741	EIF2S3
ENSG00000130749.5	ENSG00000130749	ZC3H4
ENSG00000131153.4	ENSG00000131153	GINS2
ENSG00000131914.6	ENSG00000131914	LIN28A
ENSG00000132424.10	ENSG00000132424	PNISR
ENSG00000132507.13	ENSG00000132507	EIF5A
ENSG00000132718.7	ENSG00000132718	SYT11
ENSG00000132780.12	ENSG00000132780	NASP
ENSG00000132872.7	ENSG00000132872	SYT4
ENSG00000133026.8	ENSG00000133026	MYH10
ENSG00000133131.10	ENSG00000133131	MORC4
ENSG00000133138.15	ENSG00000133138	TBC1D8B
ENSG00000133639.3	ENSG00000133639	BTG1
ENSG00000133812.10	ENSG00000133812	SBF2
ENSG00000134138.15	ENSG00000134138	MEIS2
ENSG00000134744.9	ENSG00000134744	ZCCHC11
ENSG00000134986.9	ENSG00000134986	NREP
ENSG00000135903.14	ENSG00000135903	PAX3
ENSG00000136158.6	ENSG00000136158	SPRY2
ENSG00000136160.10	ENSG00000136160	EDNRB
ENSG00000136485.10	ENSG00000136485	DCAF7
ENSG00000136603.9	ENSG00000136603	SKIL
ENSG00000136720.6	ENSG00000136720	HS6ST1
ENSG00000136960.8	ENSG00000136960	ENPP2
ENSG00000137203.6	ENSG00000137203	TFAP2A
ENSG00000137872.11	ENSG00000137872	SEMA6D
ENSG00000138078.11	ENSG00000138078	PREPL
ENSG00000138468.11	ENSG00000138468	SENP7
ENSG00000138758.7	ENSG00000138758	SEPT11
ENSG00000138798.7	ENSG00000138798	EGF
ENSG00000139163.11	ENSG00000139163	ETNK1
ENSG00000139263.7	ENSG00000139263	LRIG3
ENSG00000139318.7	ENSG00000139318	DUSP6
ENSG00000139329.4	ENSG00000139329	LUM
ENSG00000139746.11	ENSG00000139746	RBM26
ENSG00000139910.15	ENSG00000139910	NOVA1
ENSG00000140262.13	ENSG00000140262	TCF12
ENSG00000140450.7	ENSG00000140450	ARRDC4
ENSG00000140836.10	ENSG00000140836	ZFHX3
ENSG00000141314.8	ENSG00000141314	RHBDL3
ENSG00000143033.13	ENSG00000143033	MTF2
ENSG00000143401.10	ENSG00000143401	ANP32E
ENSG00000143507.13	ENSG00000143507	DUSP10
ENSG00000143742.8	ENSG00000143742	SRP9
ENSG00000143801.12	ENSG00000143801	PSEN2
ENSG00000143951.11	ENSG00000143951	WDPCP
ENSG00000144227.4	ENSG00000144227	NXPH2
ENSG00000144369.8	ENSG00000144369	FAM171B
ENSG00000144476.5	ENSG00000144476	ACKR3
ENSG00000144554.6	ENSG00000144554	FANCD2
ENSG00000144580.9	ENSG00000144580	CNOT9
ENSG00000144834.8	ENSG00000144834	TAGLN3
ENSG00000144867.7	ENSG00000144867	SRPRB
ENSG00000145362.12	ENSG00000145362	ANK2
ENSG00000145423.4	ENSG00000145423	SFRP2
ENSG00000145495.10	ENSG00000145495	MARCH6
ENSG00000145592.9	ENSG00000145592	RPL37
ENSG00000145721.7	ENSG00000145721	LIX1
ENSG00000145794.12	ENSG00000145794	MEGF10
ENSG00000146197.7	ENSG00000146197	SCUBE3
ENSG00000146457.10	ENSG00000146457	WTAP
ENSG00000147027.3	ENSG00000147027	TMEM47
ENSG00000147257.9	ENSG00000147257	GPC3
ENSG00000147488.7	ENSG00000147488	ST18
ENSG00000147862.10	ENSG00000147862	NFIB
ENSG00000148053.11	ENSG00000148053	NTRK2
ENSG00000148200.12	ENSG00000148200	NR6A1
ENSG00000148516.17	ENSG00000148516	ZEB1
ENSG00000148730.6	ENSG00000148730	EIF4EBP2
ENSG00000148908.10	ENSG00000148908	RGS10
ENSG00000149294.12	ENSG00000149294	NCAM1
ENSG00000149591.12	ENSG00000149591	TAGLN
ENSG00000149948.9	ENSG00000149948	HMGA2
ENSG00000150275.13	ENSG00000150275	PCDH15
ENSG00000150477.10	ENSG00000150477	KIAA1328
ENSG00000150991.10	ENSG00000150991	UBC
ENSG00000151150.16	ENSG00000151150	ANK3
ENSG00000151612.11	ENSG00000151612	ZNF827
ENSG00000151892.10	ENSG00000151892	GFRA1
ENSG00000151914.13	ENSG00000151914	DST
ENSG00000152208.7	ENSG00000152208	GRID2
ENSG00000152256.9	ENSG00000152256	PDK1
ENSG00000152268.8	ENSG00000152268
ENSG00000152977.5	ENSG00000152977	ZIC1
ENSG00000153406.9	ENSG00000153406	NMRAL1
ENSG00000153814.7	ENSG00000153814	JAZF1
ENSG00000154553.9	ENSG00000154553	PDLIM3
ENSG00000154721.10	ENSG00000154721	JAM2
ENSG00000154945.6	ENSG00000154945	ANKRD40
ENSG00000155090.10	ENSG00000155090	KLF10
ENSG00000155130.5	ENSG00000155130
ENSG00000155760.1	ENSG00000155760	FZD7
ENSG00000155980.7	ENSG00000155980	KIF5A
ENSG00000156976.10	ENSG00000156976	EIF4A2
ENSG00000157064.6	ENSG00000157064	NMNAT2
ENSG00000157570.7	ENSG00000157570	TSPAN18
ENSG00000157778.4	ENSG00000157778	PSMG3
ENSG00000158161.11	ENSG00000158161	EYA3
ENSG00000158604.10	ENSG00000158604	TMED4
ENSG00000159377.6	ENSG00000159377	PSMB4
ENSG00000159399.5	ENSG00000159399	HK2
ENSG00000159713.6	ENSG00000159713	TPPP3
ENSG00000160058.14	ENSG00000160058	BSDC1
ENSG00000160752.10	ENSG00000160752	FDPS
ENSG00000161016.11	ENSG00000161016	RPL8
ENSG00000161654.5	ENSG00000161654	LSM12
ENSG00000162188.5	ENSG00000162188	GNG3
ENSG00000162374.12	ENSG00000162374	ELAVL4
ENSG00000162433.10	ENSG00000162433	AK4
ENSG00000162490.6	ENSG00000162490	DRAXIN
ENSG00000162496.4	ENSG00000162496	DHRS3
ENSG00000162551.9	ENSG00000162551	ALPL
ENSG00000162599.11	ENSG00000162599	NFIA
ENSG00000162692.6	ENSG00000162692	VCAM1
ENSG00000162998.4	ENSG00000162998	FRZB
ENSG00000163083.5	ENSG00000163083	INHBB
ENSG00000163132.6	ENSG00000163132	MSX1
ENSG00000163191.5	ENSG00000163191	S100A11
ENSG00000163235.11	ENSG00000163235	TGFA
ENSG00000163291.10	ENSG00000163291	PAQR3
ENSG00000163528.8	ENSG00000163528	CHCHD4
ENSG00000163539.11	ENSG00000163539	CLASP2
ENSG00000163618.13	ENSG00000163618	CADPS
ENSG00000163646.6	ENSG00000163646	CLRN1
ENSG00000163683.7	ENSG00000163683	SMIM14
ENSG00000164032.7	ENSG00000164032	H2AFZ
ENSG00000164056.6	ENSG00000164056	SPRY1
ENSG00000164070.7	ENSG00000164070	HSPA4L
ENSG00000164134.8	ENSG00000164134	NAA15
ENSG00000164171.6	ENSG00000164171	ITGA2
ENSG00000164199.11	ENSG00000164199	ADGRV1
ENSG00000164211.8	ENSG00000164211	STARD4
ENSG00000164219.5	ENSG00000164219	PGGT1B
ENSG00000164434.7	ENSG00000164434	FABP7
ENSG00000164548.6	ENSG00000164548	TRA2A
ENSG00000164916.9	ENSG00000164916	FOXK1
ENSG00000164946.15	ENSG00000164946	FREM1
ENSG00000165556.9	ENSG00000165556	CDX2
ENSG00000165659.12	ENSG00000165659
ENSG00000165805.5	ENSG00000165805	C12orf50
ENSG00000166165.8	ENSG00000166165	CKB
ENSG00000166402.4	ENSG00000166402	TUB
ENSG00000166450.8	ENSG00000166450	PRTG
ENSG00000166508.13	ENSG00000166508	MCM7
ENSG00000166509.6	ENSG00000166509	CLEC3A
ENSG00000167232.9	ENSG00000167232	ZNF91
ENSG00000167434.5	ENSG00000167434	CA4
ENSG00000167552.9	ENSG00000167552	TUBA1A
ENSG00000167553.10	ENSG00000167553	TUBA1C
ENSG00000167601.7	ENSG00000167601	AXL
ENSG00000167747.9	ENSG00000167747	C19orf48
ENSG00000167965.13	ENSG00000167965	MLST8
ENSG00000168092.9	ENSG00000168092	PAFAH1B2
ENSG00000168496.3	ENSG00000168496	FEN1
ENSG00000168769.8	ENSG00000168769	TET2
ENSG00000168772.9	ENSG00000168772	CXXC4
ENSG00000168899.4	ENSG00000168899	VAMP5
ENSG00000168924.10	ENSG00000168924	LETM1
ENSG00000169045.13	ENSG00000169045	HNRNPH1
ENSG00000169554.12	ENSG00000169554	ZEB2
ENSG00000169855.15	ENSG00000169855	ROBO1
ENSG00000169862.14	ENSG00000169862	CTNND2
ENSG00000169905.8	ENSG00000169905	TOR1AIP2
ENSG00000170315.9	ENSG00000170315	UBB
ENSG00000171234.9	ENSG00000171234	UGT2B7
ENSG00000171291.4	ENSG00000171291	ZNF439
ENSG00000171533.7	ENSG00000171533	MAP6
ENSG00000171617.9	ENSG00000171617	ENC1
ENSG00000171634.12	ENSG00000171634	BPTF
ENSG00000171786.5	ENSG00000171786	NHLH1
ENSG00000172020.8	ENSG00000172020	GAP43
ENSG00000172667.6	ENSG00000172667	ZMAT3
ENSG00000172936.8	ENSG00000172936	MYD88
ENSG00000173212.4	ENSG00000173212	MAB21L3
ENSG00000173267.9	ENSG00000173267	SNCG
ENSG00000173320.5	ENSG00000173320	STOX2
ENSG00000173597.4	ENSG00000173597	SULT1B1
ENSG00000173786.12	ENSG00000173786	CNP
ENSG00000173905.4	ENSG00000173905	GOLIM4
ENSG00000174749.5	ENSG00000174749	FAM241A
ENSG00000174963.13	ENSG00000174963	ZIC4
ENSG00000175197.6	ENSG00000175197	DDIT3
ENSG00000175356.8	ENSG00000175356	SCUBE2
ENSG00000175898.4	ENSG00000175898
ENSG00000175928.5	ENSG00000175928	LRRN1
ENSG00000176049.11	ENSG00000176049	JAKMIP2
ENSG00000176171.7	ENSG00000176171	BNIP3
ENSG00000176887.5	ENSG00000176887	SOX11
ENSG00000177551.5	ENSG00000177551	NHLH2
ENSG00000177853.10	ENSG00000177853	ZNF518A
ENSG00000177954.7	ENSG00000177954	RPS27
ENSG00000178163.3	ENSG00000178163	ZNF518B
ENSG00000178568.9	ENSG00000178568	ERBB4
ENSG00000178573.6	ENSG00000178573	MAF
ENSG00000178662.11	ENSG00000178662	CSRNP3
ENSG00000179218.9	ENSG00000179218	CALR
ENSG00000179222.13	ENSG00000179222	MAGED1
ENSG00000179454.9	ENSG00000179454	KLHL28
ENSG00000179455.6	ENSG00000179455	MKRN3
ENSG00000179915.16	ENSG00000179915	NRXN1
ENSG00000179981.9	ENSG00000179981	TSHZ1
ENSG00000180011.6	ENSG00000180011	ZADH2
ENSG00000180178.6	ENSG00000180178	FAR2P1
ENSG00000180818.4	ENSG00000180818	HOXC10
ENSG00000181163.9	ENSG00000181163	NPM1
ENSG00000181458.6	ENSG00000181458	TMEM45A
ENSG00000181467.2	ENSG00000181467	RAP2B
ENSG00000182504.6	ENSG00000182504	CEP97
ENSG00000182670.9	ENSG00000182670	TTC3
ENSG00000182718.12	ENSG00000182718	ANXA2
ENSG00000183023.14	ENSG00000183023	SLC8A1
ENSG00000183044.7	ENSG00000183044	ABAT
ENSG00000183684.6	ENSG00000183684	ALYREF
ENSG00000183960.4	ENSG00000183960	KCNH8
ENSG00000184009.5	ENSG00000184009	ACTG1
ENSG00000184014.3	ENSG00000184014	DENND5A
ENSG00000184226.10	ENSG00000184226	PCDH9
ENSG00000184258.5	ENSG00000184258	CDR1
ENSG00000184304.10	ENSG00000184304	PRKD1
ENSG00000184349.8	ENSG00000184349	EFNA5
ENSG00000184486.7	ENSG00000184486	POU3F2
ENSG00000185304.12	ENSG00000185304	RGPD2
ENSG00000185559.9	ENSG00000185559	DLK1
ENSG00000185610.6	ENSG00000185610	DBX2
ENSG00000185630.14	ENSG00000185630	PBX1
ENSG00000185664.10	ENSG00000185664	PMEL
ENSG00000185787.10	ENSG00000185787	MORF4L1
ENSG00000185985.7	ENSG00000185985	SLITRK2
ENSG00000186472.15	ENSG00000186472	PCLO
ENSG00000186591.7	ENSG00000186591	UBE2H
ENSG00000187323.7	ENSG00000187323	DCC
ENSG00000187446.7	ENSG00000187446	CHP1
ENSG00000187627.10	ENSG00000187627	RGPD1
ENSG00000187957.7	ENSG00000187957	DNER
ENSG00000188738.9	ENSG00000188738	FSIP2
ENSG00000188994.8	ENSG00000188994	ZNF292
ENSG00000189241.6	ENSG00000189241	TSPYL1
ENSG00000196092.8	ENSG00000196092	PAX5
ENSG00000196159.7	ENSG00000196159	FAT4
ENSG00000196205.7	ENSG00000196205	EEF1A1P5
ENSG00000196220.11	ENSG00000196220	SRGAP3
ENSG00000196233.7	ENSG00000196233	LCOR
ENSG00000196353.7	ENSG00000196353	CPNE4
ENSG00000196628.9	ENSG00000196628	TCF4
ENSG00000196792.7	ENSG00000196792	STRN3
ENSG00000197147.8	ENSG00000197147	LRRC8B
ENSG00000197487.4	ENSG00000197487	GALP
ENSG00000197576.9	ENSG00000197576	HOXA4
ENSG00000197694.9	ENSG00000197694	SPTAN1
ENSG00000198408.9	ENSG00000198408	MGEA5
ENSG00000198586.9	ENSG00000198586	TLK1
ENSG00000198597.4	ENSG00000198597	ZNF536
ENSG00000198712.1	ENSG00000198712	MT-CO2
ENSG00000198727.2	ENSG00000198727	MT-CYB
ENSG00000198763.3	ENSG00000198763	MT-ND2
ENSG00000198830.6	ENSG00000198830	HMGN2
ENSG00000198846.5	ENSG00000198846	TOX
ENSG00000198888.2	ENSG00000198888	MT-ND1
ENSG00000198899.2	ENSG00000198899	MT-ATP6
ENSG00000198911.7	ENSG00000198911	SREBF2
ENSG00000198931.6	ENSG00000198931	APRT
ENSG00000198961.5	ENSG00000198961	PJA2
ENSG00000200087.1	ENSG00000200087	SNORA73B
ENSG00000203930.6	ENSG00000203930	LINC00632
ENSG00000204580.7	ENSG00000204580	DDR1
ENSG00000205542.6	ENSG00000205542	TMSB4X
ENSG00000205643.6	ENSG00000205643	CDPF1
ENSG00000206557.5	ENSG00000206557	TRIM71
ENSG00000213186.3	ENSG00000213186	TRIM59
ENSG00000213190.2	ENSG00000213190	MLLT11
ENSG00000215158.5	ENSG00000215158
ENSG00000215386.6	ENSG00000215386	MIR99AHG
ENSG00000215845.6	ENSG00000215845	TSTD1
ENSG00000218537.1	ENSG00000218537	MIF-AS1
ENSG00000221818.4	ENSG00000221818	EBF2
ENSG00000221870.2	ENSG00000221870	TMEM257
ENSG00000223518.5	ENSG00000223518	CSNK1A1P1
ENSG00000223745.3	ENSG00000223745	CCDC18-AS1
ENSG00000225783.2	ENSG00000225783	MIAT
ENSG00000225855.2	ENSG00000225855	RUSC1-AS1
ENSG00000225914.1	ENSG00000225914
ENSG00000226415.1	ENSG00000226415	TPI1P1
ENSG00000228594.1	ENSG00000228594	FNDC10
ENSG00000229241.1	ENSG00000229241	PNPT1P1
ENSG00000230002.2	ENSG00000230002	ALMS1-IT1
ENSG00000231672.2	ENSG00000231672	DIRC3
ENSG00000232274.2	ENSG00000232274
ENSG00000233251.3	ENSG00000233251
ENSG00000233476.2	ENSG00000233476	EEF1A1P6
ENSG00000234690.2	ENSG00000234690
ENSG00000234741.3	ENSG00000234741	GAS5
ENSG00000236008.1	ENSG00000236008	LINC01814
ENSG00000236031.1	ENSG00000236031
ENSG00000237515.6	ENSG00000237515	SHISA9
ENSG00000237973.1	ENSG00000237973	MTCO1P12
ENSG00000241553.8	ENSG00000241553	ARPC4
ENSG00000242125.2	ENSG00000242125	SNHG3
ENSG00000242808.3	ENSG00000242808	SOX2-OT
ENSG00000244405.3	ENSG00000244405	ETV5
ENSG00000244509.3	ENSG00000244509	APOBEC3C
ENSG00000245526.4	ENSG00000245526	LINC00461
ENSG00000245532.4	ENSG00000245532	NEAT1
ENSG00000247828.3	ENSG00000247828	TMEM161B-AS1
ENSG00000248265.1	ENSG00000248265
ENSG00000248360.3	ENSG00000248360	LINC00504
ENSG00000249348.1	ENSG00000249348	UGDH-AS1
ENSG00000249614.1	ENSG00000249614	LINC02503
ENSG00000250472.1	ENSG00000250472	TRIM36-IT1
ENSG00000250641.1	ENSG00000250641
ENSG00000250742.1	ENSG00000250742	LINC02381
ENSG00000251562.3	ENSG00000251562	MALAT1
ENSG00000253293.3	ENSG00000253293	HOXA10
ENSG00000253352.4	ENSG00000253352	TUG1
ENSG00000253661.1	ENSG00000253661	ZFHX4-AS1
ENSG00000254226.1	ENSG00000254226	LINC01933
ENSG00000255090.1	ENSG00000255090
ENSG00000255248.2	ENSG00000255248	MIR100HG
ENSG00000257935.2	ENSG00000257935	LHX5-AS1
ENSG00000258890.2	ENSG00000258890	CEP95
ENSG00000259380.1	ENSG00000259380
ENSG00000259924.1	ENSG00000259924
ENSG00000260006.1	ENSG00000260006
ENSG00000261409.1	ENSG00000261409
ENSG00000269821.1	ENSG00000269821	KCNQ1OT1
ENSG00000271524.1	ENSG00000271524	BNIP3P17
ENSG00000272093.1	ENSG00000272093
ENSG00000272108.1	ENSG00000272108
ENSG00000272216.1	ENSG00000272216
ENSG00000272579.1	ENSG00000272579

## Sheet: Table_S5
192 differential expressed genes between 'a' and 'b' subpopulation of day 0								differential expressed genes between 'a' and 'c' subpopulation of day 1								differential expressed genes between 'a' and 'b' subpopulation of day 1							differential expressed genes between 'ab' and 'c' subpopulation of Day 5									differential expressed genes between 'ab' and 'c' subpopulation of Day 7									differential expressed genes between 'ab' and 'c' subpopulation of Day 10
gencode_id	ensembl_gene_id	hgnc_symbol	log(fold change)	p-value	label			gencode_id	ensembl_gene_id	hgnc_symbol	log(fold change)	p-value	label			gencode_id	ensembl_gene_id	hgnc_symbol	log(fold change)	p-value	label		gencode_id	ensembl_gene_id	hgnc_symbol	log(fold change	p-value	label				gencode_id	ensembl_gene_id	hgnc_symbol	log(fold change)	p-value	label				gencode_id	ensembl_gene_id	hgnc_symbol	log(fold change)	p-value	label
ENSG00000114251.9	ENSG00000114251	WNT5A	3.80032	8.02e-13	d0.a..d0.b			ENSG00000135821.12	ENSG00000135821	GLUL	-2.31587	3.67221e-09	d1.a..d1.c			ENSG00000114251.9	ENSG00000114251	WNT5A	-3.07466	8.01803e-13	d1.b..d1.a		ENSG00000119547.5	ENSG00000119547	ONECUT2	-4.8846	8.01803e-13	d5.ab..d5.c				ENSG00000077279.12	ENSG00000077279	DCX	-3.77452	8.01803e-13	d7.ab..d7.c				ENSG00000077279.12	ENSG00000077279	DCX	-3.25937	8.02025e-13	d10.ab..d10.c
ENSG00000130066.12	ENSG00000130066	SAT1	2.08192	1.32352e-11	d0.a..d0.b			ENSG00000074590.9	ENSG00000074590	NUAK1	-3.20913	1.40103e-08	d1.a..d1.c			ENSG00000145423.4	ENSG00000145423	SFRP2	1.88447	4.68314e-12	d1.b..d1.a		ENSG00000139289.9	ENSG00000139289	PHLDA1	-4.58956	8.01803e-13	d5.ab..d5.c				ENSG00000104435.9	ENSG00000104435	STMN2	-4.26685	8.02691e-13	d7.ab..d7.c				ENSG00000104435.9	ENSG00000104435	STMN2	-3.32589	1.29914e-11	d10.ab..d10.c
ENSG00000184349.8	ENSG00000184349	EFNA5	-1.3549	9.91055e-10	d0.a..d0.b			ENSG00000103187.6	ENSG00000103187	COTL1	-2.31587	1.10749e-07	d1.a..d1.c			ENSG00000113140.6	ENSG00000113140	SPARC	-1.28937	1.89104e-11	d1.b..d1.a		ENSG00000147488.7	ENSG00000147488	ST18	-8.22842	8.01803e-13	d5.ab..d5.c				ENSG00000162374.12	ENSG00000162374	ELAVL4	-4.26685	5.558e-12	d7.ab..d7.c				ENSG00000162374.12	ENSG00000162374	ELAVL4	-4.05759	2.70538e-10	d10.ab..d10.c
ENSG00000233101.6	ENSG00000233101	HOXB-AS3	3.17244	4.42738e-09	d0.a..d0.b			ENSG00000225783.2	ENSG00000225783	MIAT	-3.04371	2.63535e-07	d1.a..d1.c			ENSG00000145147.15	ENSG00000145147	SLIT2	-2.01671	3.39493e-11	d1.b..d1.a		ENSG00000166426.7	ENSG00000166426	CRABP1	-3.17991	8.01803e-13	d5.ab..d5.c				ENSG00000119547.5	ENSG00000119547	ONECUT2	-3.77452	5.6779e-12	d7.ab..d7.c				ENSG00000163393.8	ENSG00000163393	SLC22A15	-6.18616	2.18174e-07	d10.ab..d10.c
ENSG00000166450.8	ENSG00000166450	PRTG	-1.52013	5.67355e-09	d0.a..d0.b			ENSG00000087303.12	ENSG00000087303	NID2	-4.13548	2.81909e-07	d1.a..d1.c			ENSG00000125430.4	ENSG00000125430	HS3ST3B1	1.88447	1.07013e-10	d1.b..d1.a		ENSG00000221818.4	ENSG00000221818	EBF2	-8.52346	8.01803e-13	d5.ab..d5.c				ENSG00000169856.7	ENSG00000169856	ONECUT1	-5.80949	4.08323e-10	d7.ab..d7.c				ENSG00000213190.2	ENSG00000213190	MLLT11	-1.82924	6.04046e-07	d10.ab..d10.c
ENSG00000143995.15	ENSG00000143995	MEIS1	-3.30463	1.06696e-08	d0.a..d0.b			ENSG00000159388.5	ENSG00000159388	BTG2	-4.06931	1.29812e-06	d1.a..d1.c			ENSG00000124942.9	ENSG00000124942	AHNAK	-3.73588	5.18667e-08	d1.b..d1.a		ENSG00000226702.1	ENSG00000226702	MIR217HG	-5.73695	8.01803e-13	d5.ab..d5.c				ENSG00000144834.8	ENSG00000144834	TAGLN3	-3.15091	6.26997e-10	d7.ab..d7.c				ENSG00000225783.2	ENSG00000225783	MIAT	-2.22835	2.72877e-06	d10.ab..d10.c
ENSG00000171843.11	ENSG00000171843	MLLT3	1.75145	8.352e-08	d0.a..d0.b			ENSG00000198719.7	ENSG00000198719	DLL1	-3.97006	4.72781e-06	d1.a..d1.c			ENSG00000043355.6	ENSG00000043355	ZIC2	-1.95059	1.12476e-07	d1.b..d1.a		ENSG00000077279.12	ENSG00000077279	DCX	-3.83556	8.02025e-13	d5.ab..d5.c				ENSG00000124766.4	ENSG00000124766	SOX4	-1.3457	1.34297e-09	d7.ab..d7.c				ENSG00000253230.2	ENSG00000253230	LINC00599	-5.38794	9.73804e-06	d10.ab..d10.c
ENSG00000105997.18	ENSG00000105997	HOXA3	1.88364	3.71485e-07	d0.a..d0.b			ENSG00000136099.9	ENSG00000136099	PCDH8	-4.40015	6.58623e-06	d1.a..d1.c			ENSG00000130066.12	ENSG00000130066	SAT1	-1.61998	1.49047e-07	d1.b..d1.a		ENSG00000162374.12	ENSG00000162374	ELAVL4	-4.65512	8.02469e-13	d5.ab..d5.c				ENSG00000176887.5	ENSG00000176887	SOX11	-1.37852	3.31044e-09	d7.ab..d7.c				ENSG00000124766.4	ENSG00000124766	SOX4	-1.66295	1.2381e-05	d10.ab..d10.c
ENSG00000180806.4	ENSG00000180806	HOXC9	4.09774	8.15559e-07	d0.a..d0.b			ENSG00000120708.12	ENSG00000120708	TGFBI	6.64985	8.3819e-06	d1.a..d1.c			ENSG00000117724.8	ENSG00000117724	CENPF	-1.42162	1.63291e-07	d1.b..d1.a		ENSG00000169856.7	ENSG00000169856	ONECUT1	-6.26147	8.38885e-13	d5.ab..d5.c				ENSG00000078018.15	ENSG00000078018	MAP2	-1.83803	5.29803e-09	d7.ab..d7.c				ENSG00000087258.9	ENSG00000087258	GNAO1	-4.75602	2.28208e-05	d10.ab..d10.c
ENSG00000174607.6	ENSG00000174607	UGT8	2.84198	8.58416e-07	d0.a..d0.b			ENSG00000165029.11	ENSG00000165029	ABCA1	-2.64671	2.01942e-05	d1.a..d1.c			ENSG00000166450.8	ENSG00000166450	PRTG	0.826521	2.28766e-07	d1.b..d1.a		ENSG00000138670.12	ENSG00000138670	RASGEF1B	-3.50773	3.18988e-10	d5.ab..d5.c				ENSG00000166426.7	ENSG00000166426	CRABP1	-2.75704	1.59819e-08	d7.ab..d7.c				ENSG00000139289.9	ENSG00000139289	PHLDA1	-3.1596	3.55099e-05	d10.ab..d10.c
ENSG00000113140.6	ENSG00000113140	SPARC	1.71841	1.43496e-06	d0.a..d0.b			ENSG00000107105.10	ENSG00000107105	ELAVL2	-3.01063	2.54538e-05	d1.a..d1.c			ENSG00000167434.5	ENSG00000167434	CA4	-3.9673	5.59731e-07	d1.b..d1.a		ENSG00000123307.3	ENSG00000123307	NEUROD4	-4.85182	1.99465e-09	d5.ab..d5.c				ENSG00000125851.5	ENSG00000125851	PCSK2	-5.84231	2.12025e-08	d7.ab..d7.c				ENSG00000107554.11	ENSG00000107554	DNMBP	5.9866	4.72484e-05	d10.ab..d10.c
ENSG00000114529.8	ENSG00000114529	C3orf52	2.51152	5.99456e-06	d0.a..d0.b			ENSG00000117724.8	ENSG00000117724	CENPF	2.44821	2.96308e-05	d1.a..d1.c			ENSG00000152268.8	ENSG00000152268		-1.95059	2.24566e-06	d1.b..d1.a		ENSG00000158258.11	ENSG00000158258	CLSTN2	-5.37634	2.82184e-09	d5.ab..d5.c				ENSG00000139289.9	ENSG00000139289	PHLDA1	-3.31502	4.06621e-08	d7.ab..d7.c				ENSG00000196361.5	ENSG00000196361	ELAVL3	-4.22388	9.05883e-05	d10.ab..d10.c
ENSG00000113361.8	ENSG00000113361	CDH6	2.2141	8.19014e-06	d0.a..d0.b			ENSG00000078699.17	ENSG00000078699	CBFA2T2	-3.40764	4.17137e-05	d1.a..d1.c			ENSG00000123560.9	ENSG00000123560	PLP1	1.5208	5.99688e-06	d1.b..d1.a		ENSG00000171786.5	ENSG00000171786	NHLH1	-7.44164	2.84571e-09	d5.ab..d5.c				ENSG00000133958.9	ENSG00000133958	UNC79	-5.31716	1.72088e-07	d7.ab..d7.c				ENSG00000171533.7	ENSG00000171533	MAP6	-1.8625	9.92233e-05	d10.ab..d10.c
ENSG00000244355.3	ENSG00000244355	LY6G6D	2.2141	1.64359e-05	d0.a..d0.b			ENSG00000155511.13	ENSG00000155511	GRIA1	6.48444	5.28546e-05	d1.a..d1.c			ENSG00000104332.7	ENSG00000104332	SFRP1	1.61998	7.7077e-06	d1.b..d1.a		ENSG00000160097.11	ENSG00000160097	FNDC5	-5.17964	5.35317e-09	d5.ab..d5.c				ENSG00000129757.8	ENSG00000129757	CDKN1C	-2.52729	5.86316e-07	d7.ab..d7.c				ENSG00000079931.10	ENSG00000079931	MOXD1	4.22388	0.000108365	d10.ab..d10.c
ENSG00000145147.15	ENSG00000145147	SLIT2	1.91668	4.07783e-05	d0.a..d0.b			ENSG00000139364.6	ENSG00000139364	TMEM132B	-2.64671	5.28568e-05	d1.a..d1.c			ENSG00000205542.6	ENSG00000205542	TMSB4X	0.826521	1.02064e-05	d1.b..d1.a		ENSG00000139767.4	ENSG00000139767	SRRM4	-3.60608	6.93803e-09	d5.ab..d5.c				ENSG00000213190.2	ENSG00000213190	MLLT11	-1.9365	9.62838e-07	d7.ab..d7.c				ENSG00000187134.8	ENSG00000187134	AKR1C1	-4.25714	0.000149922	d10.ab..d10.c
ENSG00000037965.4	ENSG00000037965	HOXC8	4.22992	4.31087e-05	d0.a..d0.b			ENSG00000166426.7	ENSG00000166426	CRABP1	-2.48129	6.87179e-05	d1.a..d1.c			ENSG00000165556.9	ENSG00000165556	CDX2	-3.802	1.37311e-05	d1.b..d1.a		ENSG00000104435.9	ENSG00000104435	STMN2	-3.70443	9.30549e-09	d5.ab..d5.c				ENSG00000163618.13	ENSG00000163618	CADPS	-3.47913	1.48285e-06	d7.ab..d7.c				ENSG00000187229.3	ENSG00000187229		-4.22388	0.000143785	d10.ab..d10.c
ENSG00000256463.4	ENSG00000256463	SALL3	2.97417	6.28153e-05	d0.a..d0.b			ENSG00000150275.13	ENSG00000150275	PCDH15	-3.97006	8.54016e-05	d1.a..d1.c			ENSG00000140937.9	ENSG00000140937	CDH11	-2.18202	2.30954e-05	d1.b..d1.a		ENSG00000225783.2	ENSG00000225783	MIAT	-2.39313	1.21191e-08	d5.ab..d5.c				ENSG00000221818.4	ENSG00000221818	EBF2	-7.35212	1.70322e-06	d7.ab..d7.c				ENSG00000078018.15	ENSG00000078018	MAP2	-1.62969	0.000189245	d10.ab..d10.c
ENSG00000007372.16	ENSG00000007372	PAX6	-3.17244	0.000113762	d0.a..d0.b			ENSG00000139132.10	ENSG00000139132	FGD4	-2.81213	0.000106907	d1.a..d1.c			ENSG00000250742.1	ENSG00000250742	LINC02381	-2.31426	3.34063e-05	d1.b..d1.a		ENSG00000162992.3	ENSG00000162992	NEUROD1	-7.63834	1.55983e-08	d5.ab..d5.c				ENSG00000257935.2	ENSG00000257935	LHX5-AS1	-5.18587	6.27482e-06	d7.ab..d7.c				ENSG00000146263.7	ENSG00000146263	MMS22L	2.36138	0.000233677	d10.ab..d10.c
ENSG00000166710.13	ENSG00000166710	B2M	1.12357	0.000119002	d0.a..d0.b			ENSG00000060718.14	ENSG00000060718	COL11A1	6.05434	0.000113652	d1.a..d1.c			ENSG00000180758.10	ENSG00000180758	GPR157	-3.37221	3.37122e-05	d1.b..d1.a		ENSG00000144834.8	ENSG00000144834	TAGLN3	-2.75373	2.72461e-08	d5.ab..d5.c				ENSG00000167654.13	ENSG00000167654	ATCAY	-5.48127	7.67555e-06	d7.ab..d7.c				ENSG00000177551.5	ENSG00000177551	NHLH2	-4.75602	0.00027404	d10.ab..d10.c
ENSG00000134138.15	ENSG00000134138	MEIS2	-5.84919	0.000136917	d0.a..d0.b			ENSG00000166165.8	ENSG00000166165	CKB	-1.42261	0.000140861	d1.a..d1.c			ENSG00000078399.11	ENSG00000078399	HOXA9	-3.2069	4.78843e-05	d1.b..d1.a		ENSG00000108001.9	ENSG00000108001	EBF3	-5.31077	3.08275e-08	d5.ab..d5.c				ENSG00000196220.11	ENSG00000196220	SRGAP3	-1.67392	8.58803e-06	d7.ab..d7.c				ENSG00000128050.4	ENSG00000128050	PAICS	1.36362	0.000345016	d10.ab..d10.c
ENSG00000164946.15	ENSG00000164946	FREM1	3.20549	0.000193381	d0.a..d0.b			ENSG00000138670.12	ENSG00000138670	RASGEF1B	-3.24222	0.000146671	d1.a..d1.c			ENSG00000117632.16	ENSG00000117632	STMN1	-0.7604	5.01766e-05	d1.b..d1.a		ENSG00000115963.9	ENSG00000115963	RND3	-3.67165	4.05898e-08	d5.ab..d5.c				ENSG00000177551.5	ENSG00000177551	NHLH2	-4.85765	1.20805e-05	d7.ab..d7.c				ENSG00000147488.7	ENSG00000147488	ST18	-3.5587	0.000323928	d10.ab..d10.c
ENSG00000182667.10	ENSG00000182667	NTM	4.06469	0.000227299	d0.a..d0.b			ENSG00000064300.4	ENSG00000064300	NGFR	-5.75659	0.00016368	d1.a..d1.c			ENSG00000125378.11	ENSG00000125378	BMP4	-3.30608	5.34817e-05	d1.b..d1.a		ENSG00000106341.6	ENSG00000106341	PPP1R17	-4.19617	3.79951e-07	d5.ab..d5.c				ENSG00000198910.8	ENSG00000198910	L1CAM	-4.59507	1.27639e-05	d7.ab..d7.c				ENSG00000174136.7	ENSG00000174136	RGMB	-2.69397	0.000335278	d10.ab..d10.c
ENSG00000165556.9	ENSG00000165556	CDX2	4.09774	0.000287713	d0.a..d0.b			ENSG00000165566.11	ENSG00000165566	AMER2	6.18668	0.00019581	d1.a..d1.c			ENSG00000120708.12	ENSG00000120708	TGFBI	-3.17384	5.47709e-05	d1.b..d1.a		ENSG00000132872.7	ENSG00000132872	SYT4	-4.03225	4.4233e-07	d5.ab..d5.c				ENSG00000145362.12	ENSG00000145362	ANK2	-2.62576	1.47167e-05	d7.ab..d7.c				ENSG00000164885.8	ENSG00000164885	CDK5	-4.65625	0.000363683	d10.ab..d10.c
ENSG00000043355.6	ENSG00000043355	ZIC2	1.09053	0.000297426	d0.a..d0.b			ENSG00000106565.13	ENSG00000106565	TMEM176B	-4.92949	0.000196169	d1.a..d1.c			ENSG00000159167.7	ENSG00000159167	STC1	-3.40527	5.55042e-05	d1.b..d1.a		ENSG00000164330.12	ENSG00000164330	EBF1	-3.76999	5.24469e-07	d5.ab..d5.c				ENSG00000143401.10	ENSG00000143401	ANP32E	1.08312	1.88573e-05	d7.ab..d7.c				ENSG00000151320.6	ENSG00000151320	AKAP6	-4.8558	0.000387366	d10.ab..d10.c
ENSG00000092421.12	ENSG00000092421	SEMA6A	2.6437	0.000298583	d0.a..d0.b			ENSG00000064651.9	ENSG00000064651	SLC12A2	-1.95195	0.00022112	d1.a..d1.c			ENSG00000112773.11	ENSG00000112773	FAM46A	-2.90935	6.92231e-05	d1.b..d1.a		ENSG00000145362.12	ENSG00000145362	ANK2	-2.72095	6.27446e-07	d5.ab..d5.c				ENSG00000072832.10	ENSG00000072832	CRMP1	-1.44417	2.12545e-05	d7.ab..d7.c				ENSG00000110042.3	ENSG00000110042	DTX4	2.22835	0.000471089	d10.ab..d10.c
ENSG00000180818.4	ENSG00000180818	HOXC10	6.67535	0.000299492	d0.a..d0.b			ENSG00000117650.8	ENSG00000117650	NEK2	5.92201	0.000229127	d1.a..d1.c			ENSG00000233101.6	ENSG00000233101	HOXB-AS3	-1.91753	8.04971e-05	d1.b..d1.a		ENSG00000157890.13	ENSG00000157890	MEGF11	-5.60582	7.05915e-07	d5.ab..d5.c				ENSG00000138670.12	ENSG00000138670	RASGEF1B	-3.31502	3.89175e-05	d7.ab..d7.c				ENSG00000114948.8	ENSG00000114948	ADAM23	4.55647	0.000460727	d10.ab..d10.c
ENSG00000139800.8	ENSG00000139800	ZIC5	2.97417	0.000411048	d0.a..d0.b			ENSG00000114107.4	ENSG00000114107	CEP70	6.48444	0.000267896	d1.a..d1.c			ENSG00000182718.12	ENSG00000182718	ANXA2	-1.65304	0.00013186	d1.b..d1.a		ENSG00000107105.10	ENSG00000107105	ELAVL2	-2.8193	7.7948e-07	d5.ab..d5.c				ENSG00000149294.12	ENSG00000149294	NCAM1	-1.54263	4.04417e-05	d7.ab..d7.c				ENSG00000164330.12	ENSG00000164330	EBF1	-2.79375	0.000605439	d10.ab..d10.c
ENSG00000120708.12	ENSG00000120708	TGFBI	2.87503	0.000496169	d0.a..d0.b			ENSG00000129757.8	ENSG00000129757	CDKN1C	-4.03623	0.000269328	d1.a..d1.c			ENSG00000128652.7	ENSG00000128652	HOXD3	-3.07466	0.000132108	d1.b..d1.a		ENSG00000250305.4	ENSG00000250305	KIAA1456	-3.08156	1.37815e-06	d5.ab..d5.c				ENSG00000155980.7	ENSG00000155980	KIF5A	-2.00214	4.04815e-05	d7.ab..d7.c				ENSG00000167654.13	ENSG00000167654	ATCAY	-3.89129	0.000610857	d10.ab..d10.c
ENSG00000180592.12	ENSG00000180592	SKIDA1	-1.48708	0.000506464	d0.a..d0.b			ENSG00000113361.8	ENSG00000113361	CDH6	1.68728	0.000286181	d1.a..d1.c			ENSG00000121570.8	ENSG00000121570	DPPA4	1.58692	0.000133229	d1.b..d1.a		ENSG00000151914.13	ENSG00000151914	DST	-1.57356	1.40115e-06	d5.ab..d5.c				ENSG00000179978.10	ENSG00000179978		-3.21655	4.63717e-05	d7.ab..d7.c				ENSG00000155980.7	ENSG00000155980	KIF5A	-2.19509	0.000709513	d10.ab..d10.c
ENSG00000177508.11	ENSG00000177508	IRX3	-2.24715	0.000520853	d0.a..d0.b			ENSG00000231865.1	ENSG00000231865	SIK3-IT1	5.72351	0.000354422	d1.a..d1.c			ENSG00000185985.7	ENSG00000185985	SLITRK2	3.07466	0.000176632	d1.b..d1.a		ENSG00000090932.6	ENSG00000090932	DLL3	-4.58956	1.97997e-06	d5.ab..d5.c				ENSG00000107105.10	ENSG00000107105	ELAVL2	-2.26471	4.71011e-05	d7.ab..d7.c				ENSG00000176887.5	ENSG00000176887	SOX11	-1.52991	0.00080265	d10.ab..d10.c
ENSG00000245532.4	ENSG00000245532	NEAT1	1.58622	0.000555591	d0.a..d0.b			ENSG00000075975.11	ENSG00000075975	MKRN2	5.49192	0.000359472	d1.a..d1.c			ENSG00000139292.8	ENSG00000139292	LGR5	2.64487	0.000191843	d1.b..d1.a		ENSG00000167654.13	ENSG00000167654	ATCAY	-4.62234	2.17284e-06	d5.ab..d5.c				ENSG00000064300.4	ENSG00000064300	NGFR	-5.28433	7.41749e-05	d7.ab..d7.c				ENSG00000139132.10	ENSG00000139132	FGD4	-2.39464	0.000946068	d10.ab..d10.c
ENSG00000260027.3	ENSG00000260027	HOXB7	1.42099	0.000571486	d0.a..d0.b			ENSG00000198830.6	ENSG00000198830	HMGN2	1.35644	0.00037063	d1.a..d1.c			ENSG00000169122.7	ENSG00000169122	FAM110B	-1.58692	0.00023166	d1.b..d1.a		ENSG00000078699.17	ENSG00000078699	CBFA2T2	-3.40939	7.43022e-06	d5.ab..d5.c				ENSG00000104722.9	ENSG00000104722	NEFM	-3.41348	7.52366e-05	d7.ab..d7.c				ENSG00000169855.15	ENSG00000169855	ROBO1	-1.92902	0.000997923	d10.ab..d10.c
ENSG00000121570.8	ENSG00000121570	DPPA4	-1.94973	0.000578013	d0.a..d0.b			ENSG00000124212.5	ENSG00000124212	PTGIS	6.25285	0.000461319	d1.a..d1.c			ENSG00000134250.13	ENSG00000134250	NOTCH2	-1.42162	0.000236773	d1.b..d1.a		ENSG00000116574.4	ENSG00000116574	RHOU	-3.04878	1.23296e-05	d5.ab..d5.c				ENSG00000106565.13	ENSG00000106565	TMEM176B	-5.84231	7.91402e-05	d7.ab..d7.c				ENSG00000159905.10	ENSG00000159905	ZNF221	-3.52544	0.00108384	d10.ab..d10.c
ENSG00000272763.1	ENSG00000272763		5.12217	0.000735061	d0.a..d0.b			ENSG00000105618.9	ENSG00000105618	PRPF31	5.75659	0.000463826	d1.a..d1.c			ENSG00000150275.13	ENSG00000150275	PCDH15	2.41344	0.000279715	d1.b..d1.a		ENSG00000173267.9	ENSG00000173267	SNCG	-4.65512	1.30358e-05	d5.ab..d5.c				ENSG00000225783.2	ENSG00000225783	MIAT	-1.90367	8.87377e-05	d7.ab..d7.c				ENSG00000165973.13	ENSG00000165973	NELL1	-4.1241	0.00111961	d10.ab..d10.c
ENSG00000166426.7	ENSG00000166426	CRABP1	-1.61927	0.000735494	d0.a..d0.b			ENSG00000159167.7	ENSG00000159167	STC1	6.1536	0.000516651	d1.a..d1.c			ENSG00000198830.6	ENSG00000198830	HMGN2	-0.727339	0.000332696	d1.b..d1.a		ENSG00000114115.5	ENSG00000114115	RBP1	-2.91765	1.33158e-05	d5.ab..d5.c				ENSG00000118473.17	ENSG00000118473	SGIP1	-5.64538	0.000115975	d7.ab..d7.c				ENSG00000107105.10	ENSG00000107105	ELAVL2	-2.09531	0.00120503	d10.ab..d10.c
ENSG00000250641.1	ENSG00000250641		3.1394	0.000901516	d0.a..d0.b			ENSG00000088682.9	ENSG00000088682	COQ9	5.525	0.000566404	d1.a..d1.c			ENSG00000113361.8	ENSG00000113361	CDH6	-1.12407	0.00041909	d1.b..d1.a		ENSG00000181965.4	ENSG00000181965	NEUROG1	-4.75347	1.72887e-05	d5.ab..d5.c				ENSG00000132872.7	ENSG00000132872	SYT4	-4.46379	0.00012229	d7.ab..d7.c				ENSG00000129757.8	ENSG00000129757	CDKN1C	-1.72946	0.00127872	d10.ab..d10.c
ENSG00000145423.4	ENSG00000145423	SFRP2	-1.12357	0.00109933	d0.a..d0.b			ENSG00000133216.12	ENSG00000133216	EPHB2	-3.01063	0.00060321	d1.a..d1.c			ENSG00000148180.12	ENSG00000148180	GSN	-3.00854	0.0004861	d1.b..d1.a		ENSG00000115310.13	ENSG00000115310	RTN4	-1.44243	2.16645e-05	d5.ab..d5.c				ENSG00000100592.11	ENSG00000100592	DAAM1	-0.984659	0.00015861	d7.ab..d7.c				ENSG00000139767.4	ENSG00000139767	SRRM4	-3.19286	0.00126626	d10.ab..d10.c
ENSG00000134755.10	ENSG00000134755	DSC2	3.70118	0.00117867	d0.a..d0.b			ENSG00000248265.1	ENSG00000248265		6.38518	0.000628307	d1.a..d1.c			ENSG00000196262.9	ENSG00000196262	PPIA	0.628156	0.000559281	d1.b..d1.a		ENSG00000144369.8	ENSG00000144369	FAM171B	-1.57356	2.42109e-05	d5.ab..d5.c				ENSG00000172977.8	ENSG00000172977	KAT5	4.69354	0.000168118	d7.ab..d7.c				ENSG00000139910.15	ENSG00000139910	NOVA1	-1.89576	0.00133542	d10.ab..d10.c
ENSG00000254369.2	ENSG00000254369	HOXA-AS3	5.7831	0.00131009	d0.a..d0.b			ENSG00000163637.7	ENSG00000163637	PRICKLE2	5.49192	0.000652274	d1.a..d1.c			ENSG00000096696.9	ENSG00000096696	DSP	-1.48774	0.000591514	d1.b..d1.a		ENSG00000104722.9	ENSG00000104722	NEFM	-4.98295	4.2983e-05	d5.ab..d5.c				ENSG00000172380.5	ENSG00000172380	GNG12	4.0371	0.000181891	d7.ab..d7.c				ENSG00000144834.8	ENSG00000144834	TAGLN3	-2.39464	0.00162771	d10.ab..d10.c
ENSG00000116962.10	ENSG00000116962	NID1	1.98278	0.00211135	d0.a..d0.b			ENSG00000145147.15	ENSG00000145147	SLIT2	2.28279	0.000678139	d1.a..d1.c			ENSG00000136160.10	ENSG00000136160	EDNRB	2.64487	0.000612635	d1.b..d1.a		ENSG00000187323.7	ENSG00000187323	DCC	-4.36008	5.02353e-05	d5.ab..d5.c				ENSG00000108001.9	ENSG00000108001	EBF3	-4.29968	0.000192593	d7.ab..d7.c				ENSG00000196922.6	ENSG00000196922	ZNF252P	-2.66071	0.00177588	d10.ab..d10.c
ENSG00000152268.8	ENSG00000152268		1.91668	0.00237699	d0.a..d0.b			ENSG00000111218.7	ENSG00000111218	PRMT8	-3.37455	0.000846659	d1.a..d1.c			ENSG00000164741.10	ENSG00000164741	DLC1	-2.84323	0.000619256	d1.b..d1.a		ENSG00000123560.9	ENSG00000123560	PLP1	1.80304	5.71909e-05	d5.ab..d5.c				ENSG00000173404.3	ENSG00000173404	INSM1	-4.16839	0.000197666	d7.ab..d7.c				ENSG00000198668.6	ENSG00000198668	CALM1	-1.19732	0.00191203	d10.ab..d10.c
ENSG00000144057.11	ENSG00000144057	ST6GAL2	2.41238	0.00239999	d0.a..d0.b			ENSG00000175928.5	ENSG00000175928	LRRN1	-2.01811	0.000867557	d1.a..d1.c			ENSG00000145362.12	ENSG00000145362	ANK2	2.2812	0.000690918	d1.b..d1.a		ENSG00000196361.5	ENSG00000196361	ELAVL3	-3.70443	6.22961e-05	d5.ab..d5.c				ENSG00000123307.3	ENSG00000123307	NEUROD4	-4.26685	0.000203545	d7.ab..d7.c				ENSG00000115963.9	ENSG00000115963	RND3	-1.72946	0.00203978	d10.ab..d10.c
ENSG00000096696.9	ENSG00000096696	DSP	1.42099	0.00250119	d0.a..d0.b			ENSG00000111897.6	ENSG00000111897	SERINC1	-1.58802	0.000873913	d1.a..d1.c			ENSG00000136099.9	ENSG00000136099	PCDH8	2.61181	0.000793879	d1.b..d1.a		ENSG00000136267.9	ENSG00000136267	DGKB	-4.91738	8.74836e-05	d5.ab..d5.c				ENSG00000196132.7	ENSG00000196132	MYT1	-5.54691	0.000208965	d7.ab..d7.c				ENSG00000163618.13	ENSG00000163618	CADPS	-2.82701	0.00204527	d10.ab..d10.c
ENSG00000139324.7	ENSG00000139324	TMTC3	1.09053	0.0025952	d0.a..d0.b			ENSG00000108176.10	ENSG00000108176	DNAJC12	-5.02875	0.000888494	d1.a..d1.c			ENSG00000147459.13	ENSG00000147459	DOCK5	1.05795	0.000796127	d1.b..d1.a		ENSG00000182985.12	ENSG00000182985	CADM1	-1.27852	0.000100159	d5.ab..d5.c				ENSG00000168280.12	ENSG00000168280	KIF5C	-2.23189	0.000265536	d7.ab..d7.c				ENSG00000111206.8	ENSG00000111206	FOXM1	3.725	0.0020793	d10.ab..d10.c
ENSG00000110917.3	ENSG00000110917	MLEC	1.28881	0.00278086	d0.a..d0.b			ENSG00000148773.8	ENSG00000148773	MKI67	3.90389	0.000895641	d1.a..d1.c			ENSG00000242808.3	ENSG00000242808	SOX2-OT	1.15713	0.000809934	d1.b..d1.a		ENSG00000091972.14	ENSG00000091972	CD200	-2.68817	0.00014801	d5.ab..d5.c				ENSG00000104725.9	ENSG00000104725		-3.18373	0.00034373	d7.ab..d7.c				ENSG00000091972.14	ENSG00000091972	CD200	-2.4279	0.00240041	d10.ab..d10.c
ENSG00000128652.7	ENSG00000128652	HOXD3	2.61066	0.00292378	d0.a..d0.b			ENSG00000096384.15	ENSG00000096384	HSP90AB1	-0.926348	0.000901929	d1.a..d1.c			ENSG00000152104.7	ENSG00000152104	PTPN14	-1.48774	0.000896327	d1.b..d1.a		ENSG00000146352.8	ENSG00000146352	CLVS2	-4.72069	0.000168095	d5.ab..d5.c				ENSG00000173114.8	ENSG00000173114	LRRN3	-2.396	0.000418324	d7.ab..d7.c				ENSG00000111218.7	ENSG00000111218	PRMT8	-3.35915	0.00252617	d10.ab..d10.c
ENSG00000185885.11	ENSG00000185885	IFITM1	2.80893	0.00314873	d0.a..d0.b			ENSG00000138160.4	ENSG00000138160	KIF11	7.24536	0.00090895	d1.a..d1.c			ENSG00000080824.14	ENSG00000080824	HSP90AA1	-0.727339	0.000944667	d1.b..d1.a		ENSG00000152932.6	ENSG00000152932	RAB3C	-3.11434	0.000243676	d5.ab..d5.c				ENSG00000154229.7	ENSG00000154229	PRKCA	5.71102	0.000461065	d7.ab..d7.c				ENSG00000145362.12	ENSG00000145362	ANK2	-2.16183	0.00292582	d10.ab..d10.c
ENSG00000125430.4	ENSG00000125430	HS3ST3B1	-1.98278	0.00341608	d0.a..d0.b			ENSG00000137337.10	ENSG00000137337	MDC1	6.98069	0.000924117	d1.a..d1.c			ENSG00000174469.13	ENSG00000174469	CNTNAP2	-1.22325	0.00116657	d1.b..d1.a		ENSG00000064300.4	ENSG00000064300	NGFR	-3.70443	0.000254614	d5.ab..d5.c				ENSG00000139767.4	ENSG00000139767	SRRM4	-3.2822	0.000476629	d7.ab..d7.c				ENSG00000159023.14	ENSG00000159023	EPB41	-3.22611	0.00306982	d10.ab..d10.c
ENSG00000189298.9	ENSG00000189298	ZKSCAN3	-3.30463	0.00396657	d0.a..d0.b			ENSG00000165556.9	ENSG00000165556	CDX2	5.26033	0.000933338	d1.a..d1.c			ENSG00000196230.8	ENSG00000196230	TUBB	-0.562034	0.00121369	d1.b..d1.a		ENSG00000129757.8	ENSG00000129757	CDKN1C	-1.96695	0.000259593	d5.ab..d5.c				ENSG00000100320.18	ENSG00000100320	RBFOX2	-1.54263	0.000503498	d7.ab..d7.c				ENSG00000166426.7	ENSG00000166426	CRABP1	-1.99553	0.00304597	d10.ab..d10.c
ENSG00000112584.9	ENSG00000112584	FAM120B	2.61066	0.004405	d0.a..d0.b			ENSG00000152784.11	ENSG00000152784	PRDM8	-5.78967	0.00101003	d1.a..d1.c			ENSG00000180287.12	ENSG00000180287	PLD5	-3.00854	0.00133235	d1.b..d1.a		ENSG00000155980.7	ENSG00000155980	KIF5A	-1.83582	0.000308582	d5.ab..d5.c				ENSG00000259976.1	ENSG00000259976		-3.54477	0.00051198	d7.ab..d7.c				ENSG00000136807.7	ENSG00000136807	CDK9	-3.49219	0.00328976	d10.ab..d10.c
ENSG00000170561.8	ENSG00000170561	IRX2	-4.98999	0.00472391	d0.a..d0.b			ENSG00000112773.11	ENSG00000112773	FAM46A	3.20913	0.00102392	d1.a..d1.c			ENSG00000170540.10	ENSG00000170540	ARL6IP1	-1.25631	0.00135529	d1.b..d1.a		ENSG00000213190.2	ENSG00000213190	MLLT11	-1.60635	0.000316787	d5.ab..d5.c				ENSG00000139910.15	ENSG00000139910	NOVA1	-1.96932	0.000559748	d7.ab..d7.c				ENSG00000028277.16	ENSG00000028277	POU2F2	-3.69174	0.00336105	d10.ab..d10.c
ENSG00000117632.16	ENSG00000117632	STMN1	0.627879	0.00487542	d0.a..d0.b			ENSG00000133059.12	ENSG00000133059	DSTYK	6.1536	0.00108718	d1.a..d1.c			ENSG00000143995.15	ENSG00000143995	MEIS1	1.25631	0.0014734	d1.b..d1.a		ENSG00000138696.6	ENSG00000138696	BMPR1B	1.60635	0.000343296	d5.ab..d5.c				ENSG00000158850.10	ENSG00000158850	B4GALT3	5.80949	0.000588821	d7.ab..d7.c				ENSG00000100592.11	ENSG00000100592	DAAM1	-1.23058	0.00349638	d10.ab..d10.c
ENSG00000113369.4	ENSG00000113369	ARRDC3	0.660926	0.00495497	d0.a..d0.b			ENSG00000043355.6	ENSG00000043355	ZIC2	2.21662	0.00111096	d1.a..d1.c			ENSG00000148773.8	ENSG00000148773	MKI67	-1.28937	0.00154155	d1.b..d1.a		ENSG00000118263.10	ENSG00000118263	KLF7	-2.72095	0.000350956	d5.ab..d5.c				ENSG00000092421.12	ENSG00000092421	SEMA6A	-2.42882	0.000610071	d7.ab..d7.c				ENSG00000119547.5	ENSG00000119547	ONECUT2	-2.66071	0.00376034	d10.ab..d10.c
ENSG00000120093.7	ENSG00000120093	HOXB3	2.01582	0.00538511	d0.a..d0.b			ENSG00000135451.8	ENSG00000135451	TROAP	5.82276	0.00118344	d1.a..d1.c			ENSG00000136960.8	ENSG00000136960	ENPP2	1.61998	0.00154784	d1.b..d1.a		ENSG00000117152.9	ENSG00000117152	RGS4	-4.78625	0.000380726	d5.ab..d5.c				ENSG00000111218.7	ENSG00000111218	PRMT8	-4.46379	0.00063699	d7.ab..d7.c				ENSG00000149294.12	ENSG00000149294	NCAM1	-1.33036	0.00377162	d10.ab..d10.c
ENSG00000224078.8	ENSG00000224078	SNHG14	0.958342	0.00549854	d0.a..d0.b			ENSG00000144485.6	ENSG00000144485	HES6	-2.64671	0.00123514	d1.a..d1.c			ENSG00000184613.6	ENSG00000184613	NELL2	1.5208	0.00159348	d1.b..d1.a		ENSG00000153707.11	ENSG00000153707	PTPRD	-1.67191	0.000416888	d5.ab..d5.c				ENSG00000151914.13	ENSG00000151914	DST	-1.24723	0.0006617	d7.ab..d7.c				ENSG00000076003.4	ENSG00000076003	MCM6	2.79375	0.00370543	d10.ab..d10.c
ENSG00000213380.9	ENSG00000213380	COG8	2.94112	0.00553212	d0.a..d0.b			ENSG00000112984.7	ENSG00000112984	KIF20A	7.11303	0.00148909	d1.a..d1.c			ENSG00000164647.4	ENSG00000164647	STEAP1	-3.23996	0.00160462	d1.b..d1.a		ENSG00000260912.1	ENSG00000260912		-2.03252	0.000458224	d5.ab..d5.c				ENSG00000171786.5	ENSG00000171786	NHLH1	-4.49661	0.000685977	d7.ab..d7.c				ENSG00000116990.9	ENSG00000116990	MYCL	3.95781	0.00369358	d10.ab..d10.c
ENSG00000118257.12	ENSG00000118257	NRP2	2.51152	0.00603616	d0.a..d0.b			ENSG00000145349.12	ENSG00000145349	CAMK2D	2.38204	0.00149934	d1.a..d1.c			ENSG00000085063.10	ENSG00000085063	CD59	-0.991825	0.0016515	d1.b..d1.a		ENSG00000072832.10	ENSG00000072832	CRMP1	-1.14739	0.00046869	d5.ab..d5.c				ENSG00000164171.6	ENSG00000164171	ITGA2	2.6914	0.000706837	d7.ab..d7.c				ENSG00000197479.4	ENSG00000197479	PCDHB11	-3.35915	0.00393235	d10.ab..d10.c
ENSG00000106536.15	ENSG00000106536	POU6F2	2.57761	0.00614339	d0.a..d0.b			ENSG00000090932.6	ENSG00000090932	DLL3	-3.24222	0.00166725	d1.a..d1.c			ENSG00000111728.6	ENSG00000111728	ST8SIA1	1.75222	0.00177847	d1.b..d1.a		ENSG00000196547.10	ENSG00000196547	MAN2A2	5.14686	0.000504449	d5.ab..d5.c				ENSG00000171861.6	ENSG00000171861	MRM3	5.15305	0.000753595	d7.ab..d7.c				ENSG00000178202.8	ENSG00000178202	KDELC2	4.1241	0.00387254	d10.ab..d10.c
ENSG00000025796.9	ENSG00000025796	SEC63	1.38794	0.00616242	d0.a..d0.b			ENSG00000164104.7	ENSG00000164104	HMGB2	1.75344	0.00178736	d1.a..d1.c			ENSG00000253293.3	ENSG00000253293	HOXA10	-3.0416	0.00179778	d1.b..d1.a		ENSG00000092847.6	ENSG00000092847	AGO1	-1.11461	0.000536287	d5.ab..d5.c				ENSG00000079102.12	ENSG00000079102	RUNX1T1	-1.96932	0.000782587	d7.ab..d7.c				ENSG00000005108.11	ENSG00000005108	THSD7A	-2.36138	0.00455733	d10.ab..d10.c
ENSG00000049449.4	ENSG00000049449	RCN1	1.52013	0.00663371	d0.a..d0.b			ENSG00000104490.13	ENSG00000104490	NCALD	-1.52186	0.00199646	d1.a..d1.c			ENSG00000139219.13	ENSG00000139219	COL2A1	1.48774	0.00199039	d1.b..d1.a		ENSG00000109991.4	ENSG00000109991	P2RX3	-6.32703	0.000564688	d5.ab..d5.c				ENSG00000134369.11	ENSG00000134369	NAV1	-1.77239	0.00078789	d7.ab..d7.c				ENSG00000101489.14	ENSG00000101489	CELF4	-3.52544	0.00455026	d10.ab..d10.c
ENSG00000147027.3	ENSG00000147027	TMEM47	-1.18967	0.00677286	d0.a..d0.b			ENSG00000164032.7	ENSG00000164032	H2AFZ	1.29027	0.00200711	d1.a..d1.c			ENSG00000154556.13	ENSG00000154556	SORBS2	-1.05795	0.00202341	d1.b..d1.a		ENSG00000176887.5	ENSG00000176887	SOX11	-0.917912	0.000587508	d5.ab..d5.c				ENSG00000174243.5	ENSG00000174243	DDX23	2.88833	0.000854755	d7.ab..d7.c				ENSG00000105939.8	ENSG00000105939	ZC3HAV1	2.46116	0.00463413	d10.ab..d10.c
ENSG00000164338.5	ENSG00000164338	UTP15	-2.57761	0.00679061	d0.a..d0.b			ENSG00000251562.3	ENSG00000251562	MALAT1	-0.893264	0.00210957	d1.a..d1.c			ENSG00000139174.6	ENSG00000139174	PRICKLE1	-2.21508	0.00202379	d1.b..d1.a		ENSG00000149294.12	ENSG00000149294	NCAM1	-1.508	0.000615071	d5.ab..d5.c				ENSG00000243069.3	ENSG00000243069	ARHGEF26-AS1	-2.65858	0.000970134	d7.ab..d7.c				ENSG00000111052.3	ENSG00000111052	LIN7A	-3.65848	0.00471048	d10.ab..d10.c
ENSG00000240563.1	ENSG00000240563	L1TD1	2.6437	0.00684182	d0.a..d0.b			ENSG00000111783.8	ENSG00000111783	RFX4	-1.55494	0.00233217	d1.a..d1.c			ENSG00000184486.7	ENSG00000184486	POU3F2	1.12407	0.00209196	d1.b..d1.a		ENSG00000166963.8	ENSG00000166963	MAP1A	-1.70469	0.000618333	d5.ab..d5.c				ENSG00000258947.2	ENSG00000258947	TUBB3	-4.20121	0.00101422	d7.ab..d7.c				ENSG00000198561.8	ENSG00000198561	CTNND1	-1.26384	0.0048451	d10.ab..d10.c
ENSG00000165443.7	ENSG00000165443	PHYHIPL	-2.04887	0.00685786	d0.a..d0.b			ENSG00000136273.7	ENSG00000136273	HUS1	5.525	0.00236872	d1.a..d1.c			ENSG00000162849.11	ENSG00000162849	KIF26B	-3.23996	0.002104	d1.b..d1.a		ENSG00000198417.5	ENSG00000198417	MT1F	-4.65512	0.000666049	d5.ab..d5.c				ENSG00000198668.6	ENSG00000198668	CALM1	-1.18159	0.00104223	d7.ab..d7.c				ENSG00000126001.11	ENSG00000126001	CEP250	5.55424	0.00484675	d10.ab..d10.c
ENSG00000198093.6	ENSG00000198093	ZNF649	-3.23854	0.00739762	d0.a..d0.b			ENSG00000115461.4	ENSG00000115461	IGFBP5	-2.61362	0.00240168	d1.a..d1.c			ENSG00000066382.12	ENSG00000066382	MPPED2	-2.77711	0.00213245	d1.b..d1.a		ENSG00000067715.9	ENSG00000067715	SYT1	-2.03252	0.000684531	d5.ab..d5.c				ENSG00000197061.3	ENSG00000197061	HIST1H4C	1.77239	0.00126355	d7.ab..d7.c				ENSG00000140365.11	ENSG00000140365	COMMD4	3.5587	0.00482967	d10.ab..d10.c
ENSG00000171234.9	ENSG00000171234	UGT2B7	-3.33767	0.00804707	d0.a..d0.b			ENSG00000122644.8	ENSG00000122644	ARL4A	-1.65419	0.00241513	d1.a..d1.c			ENSG00000141431.5	ENSG00000141431	ASXL3	-1.12407	0.00214981	d1.b..d1.a		ENSG00000151233.6	ENSG00000151233	GXYLT1	5.83529	0.000718079	d5.ab..d5.c				ENSG00000169085.7	ENSG00000169085	C8orf46	-5.21869	0.00144239	d7.ab..d7.c				ENSG00000160097.11	ENSG00000160097	FNDC5	-2.86027	0.00515987	d10.ab..d10.c
ENSG00000204682.5	ENSG00000204682	CASC10	-2.47847	0.00825522	d0.a..d0.b			ENSG00000111581.5	ENSG00000111581	NUP107	1.72036	0.00262178	d1.a..d1.c			ENSG00000167081.12	ENSG00000167081	PBX3	2.14896	0.00227559	d1.b..d1.a		ENSG00000139505.10	ENSG00000139505	MTMR6	-2.78652	0.000749934	d5.ab..d5.c				ENSG00000120251.14	ENSG00000120251	GRIA2	-5.3828	0.00150023	d7.ab..d7.c				ENSG00000123240.12	ENSG00000123240	OPTN	-3.75826	0.00537651	d10.ab..d10.c
ENSG00000198075.5	ENSG00000198075	SULT1C4	2.61066	0.00836339	d0.a..d0.b			ENSG00000184349.8	ENSG00000184349	EFNA5	-1.32335	0.00263345	d1.a..d1.c			ENSG00000148200.12	ENSG00000148200	NR6A1	0.628156	0.00227835	d1.b..d1.a		ENSG00000197102.6	ENSG00000197102	DYNC1H1	-1.11461	0.000924575	d5.ab..d5.c				ENSG00000167232.9	ENSG00000167232	ZNF91	-1.54263	0.00161929	d7.ab..d7.c				ENSG00000236534.1	ENSG00000236534	H3F3BP1	-2.46116	0.00548933	d10.ab..d10.c
ENSG00000100321.10	ENSG00000100321	SYNGR1	2.44543	0.00860914	d0.a..d0.b			ENSG00000152242.6	ENSG00000152242	C18orf25	6.3521	0.00278265	d1.a..d1.c			ENSG00000111432.4	ENSG00000111432	FZD10	-1.88447	0.00271649	d1.b..d1.a		ENSG00000139970.12	ENSG00000139970	RTN1	-3.5733	0.000934073	d5.ab..d5.c				ENSG00000250305.4	ENSG00000250305	KIAA1456	-2.6914	0.00165824	d7.ab..d7.c				ENSG00000122687.13	ENSG00000122687	MRM2	2.79375	0.00542702	d10.ab..d10.c
ENSG00000114648.7	ENSG00000114648	KLHL18	-3.10635	0.00918711	d0.a..d0.b			ENSG00000185345.14	ENSG00000185345	PRKN	-5.3265	0.00290855	d1.a..d1.c			ENSG00000196562.10	ENSG00000196562	SULF2	-2.08283	0.00295126	d1.b..d1.a		ENSG00000136237.14	ENSG00000136237	RAPGEF5	-3.93391	0.00101301	d5.ab..d5.c				ENSG00000164176.8	ENSG00000164176	EDIL3	-4.75918	0.00176158	d7.ab..d7.c				ENSG00000064547.9	ENSG00000064547	LPAR2	-2.46116	0.00681759	d10.ab..d10.c
ENSG00000182742.5	ENSG00000182742	HOXB4	2.51152	0.0092165	d0.a..d0.b			ENSG00000169856.7	ENSG00000169856	ONECUT1	-3.77156	0.00306758	d1.a..d1.c			ENSG00000231991.3	ENSG00000231991	ANXA2P2	-2.54569	0.00307645	d1.b..d1.a		ENSG00000117724.8	ENSG00000117724	CENPF	1.34408	0.00103747	d5.ab..d5.c				ENSG00000114796.11	ENSG00000114796	KLHL24	-1.96932	0.00197294	d7.ab..d7.c				ENSG00000144369.8	ENSG00000144369	FAM171B	-1.46339	0.00689902	d10.ab..d10.c
ENSG00000205542.6	ENSG00000205542	TMSB4X	-0.627879	0.00922961	d0.a..d0.b			ENSG00000125430.4	ENSG00000125430	HS3ST3B1	-1.91886	0.00333484	d1.a..d1.c			ENSG00000154229.7	ENSG00000154229	PRKCA	-1.88447	0.00326594	d1.b..d1.a		ENSG00000114423.14	ENSG00000114423	CBLB	-1.67191	0.00114757	d5.ab..d5.c				ENSG00000126804.9	ENSG00000126804	ZBTB1	2.88833	0.00198675	d7.ab..d7.c				ENSG00000152256.9	ENSG00000152256	PDK1	-1.36362	0.0068242	d10.ab..d10.c
ENSG00000174695.5	ENSG00000174695	TMEM167A	-0.958342	0.0101956	d0.a..d0.b			ENSG00000168310.6	ENSG00000168310	IRF2	-3.63922	0.0034747	d1.a..d1.c			ENSG00000155760.1	ENSG00000155760	FZD7	1.19019	0.003412	d1.b..d1.a		ENSG00000163618.13	ENSG00000163618	CADPS	-2.8193	0.00114954	d5.ab..d5.c				ENSG00000151892.10	ENSG00000151892	GFRA1	-1.67392	0.00199746	d7.ab..d7.c				ENSG00000187323.7	ENSG00000187323	DCC	-2.36138	0.00672717	d10.ab..d10.c
ENSG00000172318.4	ENSG00000172318	B3GALT1	1.22271	0.0104987	d0.a..d0.b			ENSG00000115738.5	ENSG00000115738	ID2	-1.38952	0.00348139	d1.a..d1.c			ENSG00000197930.8	ENSG00000197930	ERO1A	0.859582	0.00354311	d1.b..d1.a		ENSG00000125430.4	ENSG00000125430	HS3ST3B1	1.40965	0.00123335	d5.ab..d5.c				ENSG00000156802.8	ENSG00000156802	ATAD2	2.06778	0.00200414	d7.ab..d7.c				ENSG00000260257.1	ENSG00000260257		-1.26384	0.0067921	d10.ab..d10.c
ENSG00000106070.13	ENSG00000106070	GRB10	-2.37933	0.0106541	d0.a..d0.b			ENSG00000270189.1	ENSG00000270189		4.76407	0.00348733	d1.a..d1.c			ENSG00000075340.18	ENSG00000075340	ADD2	-1.35549	0.00363537	d1.b..d1.a		ENSG00000182957.11	ENSG00000182957	SPATA13	2.55704	0.00123622	d5.ab..d5.c				ENSG00000134262.8	ENSG00000134262	AP4B1	6.26899	0.00202458	d7.ab..d7.c				ENSG00000110987.4	ENSG00000110987	BCL7A	-2.82701	0.007163	d10.ab..d10.c
ENSG00000011009.6	ENSG00000011009	LYPLA2	-2.08192	0.0112907	d0.a..d0.b			ENSG00000123416.11	ENSG00000123416	TUBA1B	1.29027	0.00351037	d1.a..d1.c			ENSG00000157224.11	ENSG00000157224	CLDN12	-1.75222	0.00368025	d1.b..d1.a		ENSG00000135596.13	ENSG00000135596	MICAL1	-3.11434	0.0012913	d5.ab..d5.c				ENSG00000075340.18	ENSG00000075340	ADD2	-1.24723	0.00207704	d7.ab..d7.c				ENSG00000139292.8	ENSG00000139292	LGR5	7.05089	0.007383	d10.ab..d10.c
ENSG00000152270.4	ENSG00000152270	PDE3B	1.94973	0.0114871	d0.a..d0.b			ENSG00000100647.7	ENSG00000100647	SUSD6	-2.67979	0.00351967	d1.a..d1.c			ENSG00000089685.10	ENSG00000089685	BIRC5	-0.826521	0.00384301	d1.b..d1.a		ENSG00000162630.5	ENSG00000162630	B3GALT2	-3.31104	0.00148771	d5.ab..d5.c				ENSG00000160145.11	ENSG00000160145	KALRN	-2.396	0.00224163	d7.ab..d7.c				ENSG00000089157.11	ENSG00000089157	RPLP0	0.698437	0.00756263	d10.ab..d10.c
ENSG00000089597.12	ENSG00000089597	GANAB	2.04887	0.011713	d0.a..d0.b			ENSG00000143248.8	ENSG00000143248	RGS5	5.82276	0.00356022	d1.a..d1.c			ENSG00000125618.12	ENSG00000125618	PAX8	2.01671	0.0042007	d1.b..d1.a		ENSG00000168280.12	ENSG00000168280	KIF5C	-2.36034	0.00150898	d5.ab..d5.c				ENSG00000118263.10	ENSG00000118263	KLF7	-2.13343	0.00226049	d7.ab..d7.c				ENSG00000104381.8	ENSG00000104381	GDAP1	-1.39687	0.00800156	d10.ab..d10.c
ENSG00000183762.8	ENSG00000183762	KREMEN1	-3.04026	0.0118821	d0.a..d0.b			ENSG00000128513.10	ENSG00000128513	POT1	5.55809	0.00356623	d1.a..d1.c			ENSG00000128849.9	ENSG00000128849	CGNL1	-3.27302	0.00425805	d1.b..d1.a		ENSG00000128641.13	ENSG00000128641	MYO1B	-2.03252	0.0015242	d5.ab..d5.c				ENSG00000144485.6	ENSG00000144485	HES6	-2.16625	0.00226372	d7.ab..d7.c				ENSG00000143995.15	ENSG00000143995	MEIS1	-1.19732	0.00814293	d10.ab..d10.c
ENSG00000137955.11	ENSG00000137955	RABGGTB	-1.32185	0.0119193	d0.a..d0.b			ENSG00000152782.12	ENSG00000152782	PANK1	4.79716	0.00358954	d1.a..d1.c			ENSG00000114805.12	ENSG00000114805	PLCH1	1.42162	0.00427766	d1.b..d1.a		ENSG00000186487.13	ENSG00000186487	MYT1L	-3.67165	0.00161265	d5.ab..d5.c				ENSG00000156011.12	ENSG00000156011	PSD3	-1.73956	0.00233824	d7.ab..d7.c				ENSG00000146006.7	ENSG00000146006	LRRTM2	-3.12634	0.00849547	d10.ab..d10.c
ENSG00000186448.10	ENSG00000186448	ZNF197	2.24715	0.0124189	d0.a..d0.b			ENSG00000120162.9	ENSG00000120162	MOB3B	-1.98503	0.00367056	d1.a..d1.c			ENSG00000166710.13	ENSG00000166710	B2M	-0.79346	0.00428186	d1.b..d1.a		ENSG00000163531.11	ENSG00000163531	NFASC	-3.90112	0.0016702	d5.ab..d5.c				ENSG00000165029.11	ENSG00000165029	ABCA1	-2.26471	0.00235201	d7.ab..d7.c				ENSG00000162458.8	ENSG00000162458	FBLIM1	-2.56094	0.00773411	d10.ab..d10.c
ENSG00000013561.13	ENSG00000013561	RNF14	-1.88364	0.0128834	d0.a..d0.b			ENSG00000138760.4	ENSG00000138760	SCARB2	-2.08428	0.0037187	d1.a..d1.c			ENSG00000136379.7	ENSG00000136379	ABHD17C	-2.24814	0.00444355	d1.b..d1.a		ENSG00000117632.16	ENSG00000117632	STMN1	-0.753999	0.00167094	d5.ab..d5.c				ENSG00000163110.10	ENSG00000163110	PDLIM5	1.57545	0.00240873	d7.ab..d7.c				ENSG00000162992.3	ENSG00000162992	NEUROD1	-7.8491	0.00845027	d10.ab..d10.c
ENSG00000213639.5	ENSG00000213639	PPP1CB	0.462648	0.0131084	d0.a..d0.b			ENSG00000131747.10	ENSG00000131747	TOP2A	3.04371	0.0037871	d1.a..d1.c			ENSG00000139800.8	ENSG00000139800	ZIC5	-2.18202	0.00452182	d1.b..d1.a		ENSG00000154917.6	ENSG00000154917	RAB6B	-4.68791	0.00170302	d5.ab..d5.c				ENSG00000253475.1	ENSG00000253475		-2.59293	0.0024283	d7.ab..d7.c				ENSG00000173846.8	ENSG00000173846	PLK3	-3.65848	0.0076502	d10.ab..d10.c
ENSG00000250337.1	ENSG00000250337	LINC01021	0.859203	0.0131108	d0.a..d0.b			ENSG00000180354.11	ENSG00000180354	MTURN	4.92949	0.00383864	d1.a..d1.c			ENSG00000060718.14	ENSG00000060718	COL11A1	-2.54569	0.00455133	d1.b..d1.a		ENSG00000078018.15	ENSG00000078018	MAP2	-1.21295	0.00183958	d5.ab..d5.c				ENSG00000178573.6	ENSG00000178573	MAF	5.61255	0.00247308	d7.ab..d7.c				ENSG00000185650.8	ENSG00000185650	ZFP36L1	1.1308	0.00819558	d10.ab..d10.c
ENSG00000135862.5	ENSG00000135862	LAMC1	1.38794	0.0134064	d0.a..d0.b			ENSG00000171867.12	ENSG00000171867	PRNP	4.69791	0.00407754	d1.a..d1.c			ENSG00000155511.13	ENSG00000155511	GRIA1	-2.54569	0.00464047	d1.b..d1.a		ENSG00000169085.7	ENSG00000169085	C8orf46	-4.52399	0.00193839	d5.ab..d5.c				ENSG00000164087.3	ENSG00000164087	POC1A	5.51409	0.00263983	d7.ab..d7.c				ENSG00000213260.3	ENSG00000213260	YWHAZP5	-2.39464	0.00853987	d10.ab..d10.c
ENSG00000224956.5	ENSG00000224956		-2.04887	0.013544	d0.a..d0.b			ENSG00000101236.12	ENSG00000101236	RNF24	-1.95195	0.00412942	d1.a..d1.c			ENSG00000154721.10	ENSG00000154721	JAM2	0.892643	0.00475138	d1.b..d1.a		ENSG00000076554.11	ENSG00000076554	TPD52	-2.19643	0.00201918	d5.ab..d5.c				ENSG00000043355.6	ENSG00000043355	ZIC2	1.28006	0.00268222	d7.ab..d7.c				ENSG00000215513.7	ENSG00000215513		-2.56094	0.00856427	d10.ab..d10.c
ENSG00000089335.16	ENSG00000089335	ZNF302	2.2141	0.0135636	d0.a..d0.b			ENSG00000184304.10	ENSG00000184304	PRKD1	4.79716	0.00413751	d1.a..d1.c			ENSG00000176014.8	ENSG00000176014	TUBB6	-1.58692	0.00480126	d1.b..d1.a		ENSG00000145423.4	ENSG00000145423	SFRP2	1.18017	0.00226879	d5.ab..d5.c				ENSG00000198237.7	ENSG00000198237		-2.52729	0.00275335	d7.ab..d7.c				ENSG00000260230.2	ENSG00000260230	FRRS1L	-3.75826	0.00794124	d10.ab..d10.c
ENSG00000075711.16	ENSG00000075711	DLG1	1.02443	0.0135712	d0.a..d0.b			ENSG00000143333.6	ENSG00000143333	RGS16	-4.76407	0.00417582	d1.a..d1.c			ENSG00000132467.2	ENSG00000132467	UTP3	-2.38038	0.00488801	d1.b..d1.a		ENSG00000198729.4	ENSG00000198729	PPP1R14C	-3.016	0.00243491	d5.ab..d5.c				ENSG00000129595.8	ENSG00000129595	EPB41L4A	-2.46165	0.0027607	d7.ab..d7.c				ENSG00000165533.14	ENSG00000165533	TTC8	2.76049	0.00820218	d10.ab..d10.c
ENSG00000243927.1	ENSG00000243927	MRPS6	-1.09053	0.013702	d0.a..d0.b			ENSG00000124145.5	ENSG00000124145	SDC4	4.73099	0.00428438	d1.a..d1.c			ENSG00000161800.8	ENSG00000161800	RACGAP1	-2.14896	0.00493046	d1.b..d1.a		ENSG00000167548.10	ENSG00000167548	KMT2D	-2.55704	0.00246461	d5.ab..d5.c				ENSG00000130294.10	ENSG00000130294	KIF1A	-3.61041	0.00276248	d7.ab..d7.c				ENSG00000108001.9	ENSG00000108001	EBF3	-2.72723	0.00880934	d10.ab..d10.c
ENSG00000145050.11	ENSG00000145050	MANF	-3.00721	0.0141914	d0.a..d0.b			ENSG00000164330.12	ENSG00000164330	EBF1	-4.13548	0.00434126	d1.a..d1.c			ENSG00000109323.4	ENSG00000109323	MANBA	2.41344	0.00508652	d1.b..d1.a		ENSG00000173221.9	ENSG00000173221	GLRX	-3.40939	0.00248428	d5.ab..d5.c				ENSG00000139970.12	ENSG00000139970	RTN1	-3.77452	0.0027871	d7.ab..d7.c				ENSG00000167900.7	ENSG00000167900	TK1	3.79152	0.00887944	d10.ab..d10.c
ENSG00000118298.6	ENSG00000118298	CA14	1.3549	0.0155476	d0.a..d0.b			ENSG00000122863.5	ENSG00000122863	CHST3	4.69791	0.00440394	d1.a..d1.c			ENSG00000104490.13	ENSG00000104490	NCALD	0.991825	0.00548042	d1.b..d1.a		ENSG00000069956.7	ENSG00000069956	MAPK6	-1.08182	0.00270494	d5.ab..d5.c				ENSG00000236204.1	ENSG00000236204	LINC01376	-2.82269	0.00281639	d7.ab..d7.c				ENSG00000092421.12	ENSG00000092421	SEMA6A	-3.02656	0.00940924	d10.ab..d10.c
ENSG00000197885.6	ENSG00000197885	NKIRAS1	-3.1394	0.0159172	d0.a..d0.b			ENSG00000135919.8	ENSG00000135919	SERPINE2	4.66482	0.00441379	d1.a..d1.c			ENSG00000182827.8	ENSG00000182827	ACBD3	2.2812	0.00567544	d1.b..d1.a		ENSG00000165029.11	ENSG00000165029	ABCA1	-1.60635	0.00278688	d5.ab..d5.c				ENSG00000127083.7	ENSG00000127083	OMD	6.13771	0.00282341	d7.ab..d7.c				ENSG00000168280.12	ENSG00000168280	KIF5C	-2.22835	0.00961133	d10.ab..d10.c
ENSG00000105854.8	ENSG00000105854	PON2	-0.991389	0.016336	d0.a..d0.b			ENSG00000211584.9	ENSG00000211584	SLC48A1	2.71288	0.0045795	d1.a..d1.c			ENSG00000187955.7	ENSG00000187955	COL14A1	2.24814	0.00610418	d1.b..d1.a		ENSG00000137942.12	ENSG00000137942	FNBP1L	-1.14739	0.00287816	d5.ab..d5.c				ENSG00000232406.2	ENSG00000232406		-2.52729	0.00284631	d7.ab..d7.c				ENSG00000188375.3	ENSG00000188375	H3F3C	-2.39464	0.00975973	d10.ab..d10.c
ENSG00000168175.10	ENSG00000168175	MAPK1IP1L	0.528741	0.016349	d0.a..d0.b			ENSG00000130779.15	ENSG00000130779	CLIP1	-1.65419	0.00462081	d1.a..d1.c			ENSG00000164104.7	ENSG00000164104	HMGB2	-0.79346	0.00620133	d1.b..d1.a		ENSG00000142949.12	ENSG00000142949	PTPRF	-1.11461	0.00289465	d5.ab..d5.c				ENSG00000136122.11	ENSG00000136122	BORA	3.05244	0.00296958	d7.ab..d7.c				ENSG00000116574.4	ENSG00000116574	RHOU	-2.52768	0.00995079	d10.ab..d10.c
ENSG00000150275.13	ENSG00000150275	PCDH15	-1.98278	0.0164048	d0.a..d0.b			ENSG00000134250.13	ENSG00000134250	NOTCH2	2.08428	0.00463154	d1.a..d1.c			ENSG00000260565.2	ENSG00000260565	ERVK13-1	2.67793	0.00620975	d1.b..d1.a		ENSG00000055917.11	ENSG00000055917	PUM2	-1.04904	0.00294405	d5.ab..d5.c				ENSG00000153253.11	ENSG00000153253	SCN3A	-3.77452	0.00311638	d7.ab..d7.c				ENSG00000070501.7	ENSG00000070501	POLB	-2.56094	0.0102426	d10.ab..d10.c
ENSG00000110906.8	ENSG00000110906	KCTD10	-0.958342	0.0167563	d0.a..d0.b			ENSG00000189403.10	ENSG00000189403	HMGB1	1.09177	0.00499091	d1.a..d1.c			ENSG00000180354.11	ENSG00000180354	MTURN	-2.57875	0.00667151	d1.b..d1.a		ENSG00000105755.3	ENSG00000105755	ETHE1	4.55678	0.00297476	d5.ab..d5.c				ENSG00000223709.4	ENSG00000223709	TRIM64EP	-2.19907	0.00328099	d7.ab..d7.c				ENSG00000109472.9	ENSG00000109472	CPE	-2.19509	0.0103645	d10.ab..d10.c
ENSG00000048540.10	ENSG00000048540	LMO3	-1.85059	0.0168631	d0.a..d0.b			ENSG00000215256.3	ENSG00000215256	DHRS4-AS1	4.59866	0.00500652	d1.a..d1.c			ENSG00000140650.7	ENSG00000140650	PMM2	2.41344	0.00674467	d1.b..d1.a		ENSG00000156968.8	ENSG00000156968	MPV17L	-2.19643	0.00317006	d5.ab..d5.c				ENSG00000164104.7	ENSG00000164104	HMGB2	1.0503	0.00332016	d7.ab..d7.c				ENSG00000130522.4	ENSG00000130522	JUND	-2.12857	0.0105338	d10.ab..d10.c
ENSG00000117394.15	ENSG00000117394	SLC2A1	-1.22271	0.0170868	d0.a..d0.b			ENSG00000253734.1	ENSG00000253734	LINC01289	-3.60614	0.00502468	d1.a..d1.c			ENSG00000131747.10	ENSG00000131747	TOP2A	-1.09101	0.00680738	d1.b..d1.a		ENSG00000004866.14	ENSG00000004866	ST7	-2.45869	0.00317595	d5.ab..d5.c				ENSG00000100167.15	ENSG00000100167	SEPT3	-1.67392	0.00334204	d7.ab..d7.c				ENSG00000178458.5	ENSG00000178458	H3F3AP6	-2.29486	0.0104743	d10.ab..d10.c
ENSG00000115758.8	ENSG00000115758	ODC1	0.793111	0.0174375	d0.a..d0.b			ENSG00000179909.11	ENSG00000179909	ZNF154	-4.03623	0.00516807	d1.a..d1.c			ENSG00000130707.13	ENSG00000130707	ASS1	-1.95059	0.00700231	d1.b..d1.a		ENSG00000144026.7	ENSG00000144026	ZNF514	3.17991	0.00318829	d5.ab..d5.c				ENSG00000067715.9	ENSG00000067715	SYT1	-2.03496	0.00335646	d7.ab..d7.c				ENSG00000248510.2	ENSG00000248510	LINC02267	-2.16183	0.0101707	d10.ab..d10.c
ENSG00000158427.10	ENSG00000158427	TMSB15B	-1.98278	0.0180203	d0.a..d0.b			ENSG00000100316.11	ENSG00000100316	RPL3	-0.893264	0.00518608	d1.a..d1.c			ENSG00000163110.10	ENSG00000163110	PDLIM5	0.958765	0.00703824	d1.b..d1.a		ENSG00000169627.7	ENSG00000169627	BOLA2B	-2.45869	0.00352038	d5.ab..d5.c				ENSG00000235363.1	ENSG00000235363	SNRPGP10	-2.9868	0.00336948	d7.ab..d7.c				ENSG00000164924.13	ENSG00000164924	YWHAZ	-0.698437	0.0109587	d10.ab..d10.c
ENSG00000116918.9	ENSG00000116918	TSNAX	-1.12357	0.0183714	d0.a..d0.b			ENSG00000123213.18	ENSG00000123213	NLN	6.28593	0.00528015	d1.a..d1.c			ENSG00000105997.18	ENSG00000105997	HOXA3	-1.19019	0.00742729	d1.b..d1.a		ENSG00000196526.6	ENSG00000196526	AFAP1	-3.17991	0.00358619	d5.ab..d5.c				ENSG00000162188.5	ENSG00000162188	GNG3	-3.47913	0.00345525	d7.ab..d7.c				ENSG00000250472.1	ENSG00000250472	TRIM36-IT1	-2.12857	0.0110355	d10.ab..d10.c
ENSG00000236287.3	ENSG00000236287	ZBED5	1.3549	0.0186445	d0.a..d0.b			ENSG00000070214.11	ENSG00000070214	SLC44A1	6.91453	0.00547749	d1.a..d1.c			ENSG00000163618.13	ENSG00000163618	CADPS	-2.34732	0.0074818	d1.b..d1.a		ENSG00000188375.3	ENSG00000188375	H3F3C	-2.13087	0.0037574	d5.ab..d5.c				ENSG00000139618.10	ENSG00000139618	BRCA2	2.00214	0.00358042	d7.ab..d7.c				ENSG00000118298.6	ENSG00000118298	CA14	1.56317	0.0115174	d10.ab..d10.c
ENSG00000242808.3	ENSG00000242808	SOX2-OT	-1.28881	0.0189596	d0.a..d0.b			ENSG00000134982.12	ENSG00000134982	APC	-2.0512	0.00549284	d1.a..d1.c			ENSG00000142541.12	ENSG00000142541	RPL13A	0.495913	0.0076244	d1.b..d1.a		ENSG00000114805.12	ENSG00000114805	PLCH1	1.86861	0.0038321	d5.ab..d5.c				ENSG00000167037.14	ENSG00000167037	SGSM1	-3.77452	0.00366377	d7.ab..d7.c				ENSG00000170802.11	ENSG00000170802	FOXN2	-2.12857	0.0117423	d10.ab..d10.c
ENSG00000068697.6	ENSG00000068697	LAPTM4A	1.3549	0.0189905	d0.a..d0.b			ENSG00000130066.12	ENSG00000130066	SAT1	1.48877	0.00561471	d1.a..d1.c			ENSG00000103449.7	ENSG00000103449	SALL1	-0.958765	0.00767901	d1.b..d1.a		ENSG00000078804.8	ENSG00000078804	TP53INP2	-3.24547	0.00407728	d5.ab..d5.c				ENSG00000171533.7	ENSG00000171533	MAP6	-1.87085	0.00379306	d7.ab..d7.c				ENSG00000204794.6	ENSG00000204794		-2.76049	0.0115764	d10.ab..d10.c
ENSG00000050130.13	ENSG00000050130	JKAMP	0.859203	0.0197541	d0.a..d0.b			ENSG00000164647.4	ENSG00000164647	STEAP1	5.16108	0.00571127	d1.a..d1.c			ENSG00000250208.2	ENSG00000250208	FZD10-AS1	2.24814	0.0078223	d1.b..d1.a		ENSG00000151150.16	ENSG00000151150	ANK3	-1.93417	0.004092	d5.ab..d5.c				ENSG00000164330.12	ENSG00000164330	EBF1	-2.9868	0.00392271	d7.ab..d7.c				ENSG00000257727.1	ENSG00000257727	CNPY2	-2.79375	0.0116497	d10.ab..d10.c
ENSG00000122952.12	ENSG00000122952	ZWINT	0.793111	0.0199035	d0.a..d0.b			ENSG00000136870.6	ENSG00000136870	ZNF189	4.86333	0.00573631	d1.a..d1.c			ENSG00000164330.12	ENSG00000164330	EBF1	2.14896	0.00849399	d1.b..d1.a		ENSG00000253366.2	ENSG00000253366		-2.22921	0.00411965	d5.ab..d5.c				ENSG00000134986.9	ENSG00000134986	NREP	-0.754905	0.00400937	d7.ab..d7.c				ENSG00000106571.8	ENSG00000106571	GLI3	1.36362	0.0122248	d10.ab..d10.c
ENSG00000272168.1	ENSG00000272168	CASC15	2.54456	0.0202125	d0.a..d0.b			ENSG00000081138.9	ENSG00000081138	CDH7	-3.0768	0.0058201	d1.a..d1.c			ENSG00000174444.10	ENSG00000174444	RPL4	0.495913	0.00849862	d1.b..d1.a		ENSG00000224838.2	ENSG00000224838		-2.42591	0.00436893	d5.ab..d5.c				ENSG00000173706.8	ENSG00000173706	HEG1	2.19907	0.00411417	d7.ab..d7.c				ENSG00000131238.12	ENSG00000131238	PPT1	1.36362	0.0121491	d10.ab..d10.c
ENSG00000255794.2	ENSG00000255794	RMST	-1.3549	0.0214296	d0.a..d0.b			ENSG00000089685.10	ENSG00000089685	BIRC5	1.88578	0.00589376	d1.a..d1.c			ENSG00000007372.16	ENSG00000007372	PAX6	1.09101	0.00855989	d1.b..d1.a		ENSG00000063854.8	ENSG00000063854	HAGH	-3.44217	0.00446337	d5.ab..d5.c				ENSG00000187957.7	ENSG00000187957	DNER	-3.34784	0.00412937	d7.ab..d7.c				ENSG00000176915.10	ENSG00000176915	ANKLE2	-2.56094	0.0119069	d10.ab..d10.c
ENSG00000163961.4	ENSG00000163961	RNF168	-0.925296	0.0224699	d0.a..d0.b			ENSG00000126016.9	ENSG00000126016	AMOT	5.45884	0.00601769	d1.a..d1.c			ENSG00000164032.7	ENSG00000164032	H2AFZ	-0.495913	0.00863181	d1.b..d1.a		ENSG00000115762.12	ENSG00000115762	PLEKHB2	-1.40965	0.00461319	d5.ab..d5.c				ENSG00000186487.13	ENSG00000186487	MYT1L	-3.7417	0.00430487	d7.ab..d7.c				ENSG00000112294.8	ENSG00000112294	ALDH5A1	2.26161	0.0121147	d10.ab..d10.c
ENSG00000269473.1	ENSG00000269473		2.2141	0.0229455	d0.a..d0.b			ENSG00000197226.8	ENSG00000197226	TBC1D9B	5.22725	0.00641994	d1.a..d1.c			ENSG00000143390.13	ENSG00000143390	RFX5	1.85141	0.00930572	d1.b..d1.a		ENSG00000089818.12	ENSG00000089818	NECAP1	-2.0653	0.00479427	d5.ab..d5.c				ENSG00000117632.16	ENSG00000117632	STMN1	-0.557973	0.00436735	d7.ab..d7.c				ENSG00000168000.10	ENSG00000168000	BSCL2	-2.16183	0.0126485	d10.ab..d10.c
ENSG00000018625.10	ENSG00000018625	ATP1A2	1.61927	0.0236625	d0.a..d0.b			ENSG00000161533.7	ENSG00000161533	ACOX1	4.59866	0.00644895	d1.a..d1.c			ENSG00000005020.8	ENSG00000005020	SKAP2	-1.75222	0.00937642	d1.b..d1.a		ENSG00000090520.6	ENSG00000090520	DNAJB11	-2.09808	0.00501665	d5.ab..d5.c				ENSG00000179456.9	ENSG00000179456	ZBTB18	-2.16625	0.00438501	d7.ab..d7.c				ENSG00000171786.5	ENSG00000171786	NHLH1	-3.39241	0.0127033	d10.ab..d10.c
ENSG00000206527.5	ENSG00000206527	HACD2	1.85059	0.0238537	d0.a..d0.b			ENSG00000118985.10	ENSG00000118985	ELL2	-2.21662	0.00650998	d1.a..d1.c			ENSG00000218510.3	ENSG00000218510	LINC00339	2.64487	0.00967085	d1.b..d1.a		ENSG00000104725.9	ENSG00000104725		-2.39313	0.00508022	d5.ab..d5.c				ENSG00000260747.1	ENSG00000260747		-2.46165	0.00439853	d7.ab..d7.c				ENSG00000115310.13	ENSG00000115310	RTN4	-1.03103	0.0128471	d10.ab..d10.c
ENSG00000206579.7	ENSG00000206579	XKR4	2.28019	0.0241457	d0.a..d0.b			ENSG00000196205.7	ENSG00000196205	EEF1A1P5	-0.727845	0.00720587	d1.a..d1.c			ENSG00000124813.16	ENSG00000124813	RUNX2	-2.34732	0.00978936	d1.b..d1.a		ENSG00000100592.11	ENSG00000100592	DAAM1	-0.721216	0.00512154	d5.ab..d5.c				ENSG00000164818.11	ENSG00000164818	DNAAF5	5.3828	0.00447948	d7.ab..d7.c				ENSG00000159128.10	ENSG00000159128	IFNGR2	-1.59643	0.0130742	d10.ab..d10.c
ENSG00000171105.9	ENSG00000171105	INSR	1.02443	0.0244209	d0.a..d0.b			ENSG00000145555.10	ENSG00000145555	MYO10	-2.11737	0.00720725	d1.a..d1.c			ENSG00000147403.12	ENSG00000147403	RPL10	0.462852	0.00982014	d1.b..d1.a		ENSG00000178127.8	ENSG00000178127	NDUFV2	-2.03252	0.00514587	d5.ab..d5.c				ENSG00000166257.4	ENSG00000166257	SCN3B	-3.31502	0.00452148	d7.ab..d7.c				ENSG00000198453.8	ENSG00000198453	ZNF568	-3.29263	0.0131903	d10.ab..d10.c
ENSG00000120694.15	ENSG00000120694	HSPH1	-0.991389	0.0245204	d0.a..d0.b			ENSG00000142541.12	ENSG00000142541	RPL13A	-0.959432	0.00734658	d1.a..d1.c			ENSG00000143248.8	ENSG00000143248	RGS5	-2.2812	0.00984273	d1.b..d1.a		ENSG00000067445.16	ENSG00000067445	TRO	-1.47522	0.00527775	d5.ab..d5.c				ENSG00000111052.3	ENSG00000111052	LIN7A	-2.65858	0.00455651	d7.ab..d7.c				ENSG00000254275.2	ENSG00000254275	LINC00824	-2.16183	0.0132942	d10.ab..d10.c
ENSG00000167552.9	ENSG00000167552	TUBA1A	-0.429602	0.0246309	d0.a..d0.b			ENSG00000134686.12	ENSG00000134686	PHC2	-1.78653	0.0074084	d1.a..d1.c			ENSG00000129595.8	ENSG00000129595	EPB41L4A	1.95059	0.00987505	d1.b..d1.a		ENSG00000171533.7	ENSG00000171533	MAP6	-2.19643	0.00536236	d5.ab..d5.c				ENSG00000103034.10	ENSG00000103034	NDRG4	-2.396	0.00457331	d7.ab..d7.c				ENSG00000134757.4	ENSG00000134757	DSG3	-2.26161	0.0137379	d10.ab..d10.c
ENSG00000116127.13	ENSG00000116127	ALMS1	1.25576	0.0246853	d0.a..d0.b			ENSG00000154928.12	ENSG00000154928	EPHB1	-2.54746	0.00757261	d1.a..d1.c			ENSG00000144749.9	ENSG00000144749	LRIG1	0.925704	0.00994274	d1.b..d1.a		ENSG00000171606.13	ENSG00000171606	ZNF274	3.5733	0.00550932	d5.ab..d5.c				ENSG00000109991.4	ENSG00000109991	P2RX3	-4.75918	0.00457658	d7.ab..d7.c				ENSG00000138670.12	ENSG00000138670	RASGEF1B	-3.02656	0.0137289	d10.ab..d10.c
ENSG00000174469.13	ENSG00000174469	CNTNAP2	1.48708	0.0247863	d0.a..d0.b			ENSG00000128567.12	ENSG00000128567	PODXL	2.31587	0.0076023	d1.a..d1.c			ENSG00000047410.9	ENSG00000047410	TPR	-0.727339	0.0101035	d1.b..d1.a		ENSG00000226958.1	ENSG00000226958		-1.96695	0.00568794	d5.ab..d5.c				ENSG00000164796.13	ENSG00000164796	CSMD3	-3.70888	0.0046912	d7.ab..d7.c				ENSG00000187672.8	ENSG00000187672	ERC2	-2.59419	0.0140749	d10.ab..d10.c
ENSG00000242125.2	ENSG00000242125	SNHG3	-0.89225	0.0256798	d0.a..d0.b			ENSG00000166450.8	ENSG00000166450	PRTG	-0.926348	0.00774838	d1.a..d1.c			ENSG00000185345.14	ENSG00000185345	PRKN	2.47956	0.0101148	d1.b..d1.a		ENSG00000136715.13	ENSG00000136715	SAP130	3.93391	0.00597138	d5.ab..d5.c				ENSG00000253230.2	ENSG00000253230	LINC00599	-5.54691	0.00482137	d7.ab..d7.c				ENSG00000172890.7	ENSG00000172890	NADSYN1	-3.65848	0.0143254	d10.ab..d10.c
ENSG00000242445.1	ENSG00000242445	RPL7AP11	3.46986	0.0262926	d0.a..d0.b			ENSG00000214114.4	ENSG00000214114	MYCBP	2.41512	0.00778275	d1.a..d1.c			ENSG00000114529.8	ENSG00000114529	C3orf52	-1.91753	0.0101931	d1.b..d1.a		ENSG00000136160.10	ENSG00000136160	EDNRB	2.98321	0.0060752	d5.ab..d5.c				ENSG00000117724.8	ENSG00000117724	CENPF	1.24723	0.0048424	d7.ab..d7.c				ENSG00000197124.7	ENSG00000197124	ZNF682	3.725	0.0142899	d10.ab..d10.c
ENSG00000144749.9	ENSG00000144749	LRIG1	-1.25576	0.0263691	d0.a..d0.b			ENSG00000152127.4	ENSG00000152127	MGAT5	6.05434	0.00779363	d1.a..d1.c			ENSG00000168772.9	ENSG00000168772	CXXC4	1.05795	0.01031	d1.b..d1.a		ENSG00000103187.6	ENSG00000103187	COTL1	-1.54078	0.00608289	d5.ab..d5.c				ENSG00000257759.2	ENSG00000257759		-3.38066	0.00495741	d7.ab..d7.c				ENSG00000069345.7	ENSG00000069345	DNAJA2	-1.09754	0.0151512	d10.ab..d10.c
ENSG00000112282.13	ENSG00000112282	MED23	-1.45404	0.0265687	d0.a..d0.b			ENSG00000153071.10	ENSG00000153071	DAB2	4.56557	0.0078375	d1.a..d1.c			ENSG00000179542.11	ENSG00000179542	SLITRK4	2.31426	0.0104059	d1.b..d1.a		ENSG00000213260.3	ENSG00000213260	YWHAZP5	-2.03252	0.00611381	d5.ab..d5.c				ENSG00000141431.5	ENSG00000141431	ASXL3	-1.31288	0.00498305	d7.ab..d7.c				ENSG00000117020.12	ENSG00000117020	AKT3	-1.99553	0.0150519	d10.ab..d10.c
ENSG00000096060.10	ENSG00000096060	FKBP5	-1.18967	0.027309	d0.a..d0.b			ENSG00000105939.8	ENSG00000105939	ZC3HAV1	2.31587	0.00784008	d1.a..d1.c			ENSG00000137812.15	ENSG00000137812	KNL1	-1.28937	0.0111299	d1.b..d1.a		ENSG00000146197.7	ENSG00000146197	SCUBE3	0.885129	0.00614798	d5.ab..d5.c				ENSG00000074590.9	ENSG00000074590	NUAK1	-2.10061	0.00504375	d7.ab..d7.c				ENSG00000212961.4	ENSG00000212961	HNRNPA1P40	-2.16183	0.0151214	d10.ab..d10.c
ENSG00000184992.10	ENSG00000184992	BRI3BP	1.3549	0.0273233	d0.a..d0.b			ENSG00000165646.7	ENSG00000165646	SLC18A2	4.4994	0.00788666	d1.a..d1.c			ENSG00000166426.7	ENSG00000166426	CRABP1	1.12407	0.0112255	d1.b..d1.a		ENSG00000076604.10	ENSG00000076604	TRAF4	-3.70443	0.0061889	d5.ab..d5.c				ENSG00000101003.8	ENSG00000101003	GINS1	2.06778	0.00518821	d7.ab..d7.c				ENSG00000139219.13	ENSG00000139219	COL2A1	3.725	0.0148615	d10.ab..d10.c
ENSG00000163191.5	ENSG00000163191	S100A11	1.58622	0.0276603	d0.a..d0.b			ENSG00000131149.13	ENSG00000131149	GSE1	-2.38204	0.00794216	d1.a..d1.c			ENSG00000163510.9	ENSG00000163510	CWC22	-0.991825	0.0113314	d1.b..d1.a		ENSG00000101236.12	ENSG00000101236	RNF24	-1.508	0.00622589	d5.ab..d5.c				ENSG00000168461.8	ENSG00000168461	RAB31	3.05244	0.00521045	d7.ab..d7.c				ENSG00000133958.9	ENSG00000133958	UNC79	-6.58526	0.0160119	d10.ab..d10.c
ENSG00000106261.12	ENSG00000106261	ZKSCAN1	0.958342	0.0284895	d0.a..d0.b			ENSG00000107554.11	ENSG00000107554	DNMBP	4.69791	0.00808612	d1.a..d1.c			ENSG00000213089.4	ENSG00000213089	PDCL3P5	-2.04977	0.0114007	d1.b..d1.a		ENSG00000217624.2	ENSG00000217624		-1.96695	0.00623136	d5.ab..d5.c				ENSG00000221947.3	ENSG00000221947	XKR9	-2.16625	0.00524673	d7.ab..d7.c				ENSG00000134313.10	ENSG00000134313	KIDINS220	-1.06429	0.0159544	d10.ab..d10.c
ENSG00000138758.7	ENSG00000138758	SEPT11	-0.826157	0.0286666	d0.a..d0.b			ENSG00000111554.10	ENSG00000111554	MDM1	4.96258	0.00810834	d1.a..d1.c			ENSG00000180592.12	ENSG00000180592	SKIDA1	0.694278	0.0114304	d1.b..d1.a		ENSG00000054965.6	ENSG00000054965	FAM168A	2.22921	0.00641636	d5.ab..d5.c				ENSG00000260230.2	ENSG00000260230	FRRS1L	-6.36746	0.00529238	d7.ab..d7.c				ENSG00000184144.5	ENSG00000184144	CNTN2	-3.02656	0.0154262	d10.ab..d10.c
ENSG00000152700.9	ENSG00000152700	SAR1B	-0.925296	0.0290917	d0.a..d0.b			ENSG00000111206.8	ENSG00000111206	FOXM1	2.94446	0.00820362	d1.a..d1.c			ENSG00000213020.4	ENSG00000213020	ZNF611	-2.4465	0.0115427	d1.b..d1.a		ENSG00000148798.5	ENSG00000148798	INA	-2.09808	0.00643964	d5.ab..d5.c				ENSG00000197808.7	ENSG00000197808	ZNF461	-2.62576	0.00535976	d7.ab..d7.c				ENSG00000204370.4	ENSG00000204370		1.59643	0.0155976	d10.ab..d10.c
ENSG00000160767.16	ENSG00000160767	FAM189B	-2.61066	0.02966	d0.a..d0.b			ENSG00000134602.11	ENSG00000134602	STK26	4.89641	0.00835168	d1.a..d1.c			ENSG00000170558.4	ENSG00000170558	CDH2	0.694278	0.0116338	d1.b..d1.a		ENSG00000131037.10	ENSG00000131037	EPS8L1	-2.91765	0.00655451	d5.ab..d5.c				ENSG00000104112.4	ENSG00000104112	SCG3	-3.01962	0.00537576	d7.ab..d7.c				ENSG00000217624.2	ENSG00000217624		-2.29486	0.0159734	d10.ab..d10.c
ENSG00000235609.4	ENSG00000235609		-1.91668	0.0302886	d0.a..d0.b			ENSG00000104725.9	ENSG00000104725		2.84521	0.0083544	d1.a..d1.c			ENSG00000115414.14	ENSG00000115414	FN1	-1.15713	0.011779	d1.b..d1.a		ENSG00000170631.10	ENSG00000170631	ZNF16	3.3766	0.00662918	d5.ab..d5.c				ENSG00000065609.10	ENSG00000065609	SNAP91	-3.08526	0.00537893	d7.ab..d7.c				ENSG00000245904.2	ENSG00000245904		-3.69174	0.0158191	d10.ab..d10.c
ENSG00000213965.3	ENSG00000213965	NUDT19	-0.991389	0.0306217	d0.a..d0.b			ENSG00000138764.9	ENSG00000138764	CCNG2	-2.58054	0.00838544	d1.a..d1.c			ENSG00000162551.9	ENSG00000162551	ALPL	-1.71916	0.0119043	d1.b..d1.a		ENSG00000114573.5	ENSG00000114573	ATP6V1A	-1.24574	0.0068826	d5.ab..d5.c				ENSG00000151320.6	ENSG00000151320	AKAP6	-3.47913	0.00567433	d7.ab..d7.c				ENSG00000249736.1	ENSG00000249736	LINC02242	-2.32812	0.0162324	d10.ab..d10.c
ENSG00000127990.11	ENSG00000127990	SGCE	1.98278	0.0313144	d0.a..d0.b			ENSG00000204160.7	ENSG00000204160	ZDHHC18	4.66482	0.00843865	d1.a..d1.c			ENSG00000114107.4	ENSG00000114107	CEP70	-1.55386	0.0120091	d1.b..d1.a		ENSG00000233994.2	ENSG00000233994	GDI2P2	-2.09808	0.00767203	d5.ab..d5.c				ENSG00000130787.9	ENSG00000130787	HIP1R	-3.90581	0.00573181	d7.ab..d7.c				ENSG00000078804.8	ENSG00000078804	TP53INP2	-3.32589	0.0167465	d10.ab..d10.c
ENSG00000244694.3	ENSG00000244694	PTCHD4	1.05748	0.0314707	d0.a..d0.b			ENSG00000074800.9	ENSG00000074800	ENO1	0.959432	0.00857664	d1.a..d1.c			ENSG00000185070.6	ENSG00000185070	FLRT2	-2.24814	0.0120877	d1.b..d1.a		ENSG00000220583.1	ENSG00000220583	RPL35P2	-2.42591	0.00775067	d5.ab..d5.c				ENSG00000157216.11	ENSG00000157216	SSBP3	-1.3457	0.00589457	d7.ab..d7.c				ENSG00000168772.9	ENSG00000168772	CXXC4	-0.964508	0.0167898	d10.ab..d10.c
ENSG00000139318.7	ENSG00000139318	DUSP6	0.958342	0.0315769	d0.a..d0.b			ENSG00000148200.12	ENSG00000148200	NR6A1	-1.2241	0.00877742	d1.a..d1.c			ENSG00000107438.4	ENSG00000107438	PDLIM1	-1.98365	0.0122872	d1.b..d1.a		ENSG00000018189.8	ENSG00000018189	RUFY3	-1.27852	0.0077655	d5.ab..d5.c				ENSG00000173267.9	ENSG00000173267	SNCG	-2.19907	0.00596666	d7.ab..d7.c				ENSG00000089006.12	ENSG00000089006	SNX5	1.2971	0.0181729	d10.ab..d10.c
ENSG00000066855.11	ENSG00000066855	MTFR1	-1.81755	0.0315811	d0.a..d0.b			ENSG00000140937.9	ENSG00000140937	CDH11	1.8527	0.00884364	d1.a..d1.c			ENSG00000066279.12	ENSG00000066279	ASPM	-1.22325	0.0124482	d1.b..d1.a		ENSG00000116299.12	ENSG00000116299	KIAA1324	-2.29478	0.00783683	d5.ab..d5.c				ENSG00000113657.8	ENSG00000113657	DPYSL3	-1.57545	0.00599153	d7.ab..d7.c				ENSG00000100167.15	ENSG00000100167	SEPT3	-1.92902	0.0171073	d10.ab..d10.c
ENSG00000182287.9	ENSG00000182287	AP1S2	0.760065	0.0315946	d0.a..d0.b			ENSG00000198464.9	ENSG00000198464	ZNF480	-2.84521	0.00892106	d1.a..d1.c			ENSG00000164434.7	ENSG00000164434	FABP7	1.38856	0.012524	d1.b..d1.a		ENSG00000232385.2	ENSG00000232385	RPS3AP25	-2.13087	0.00788088	d5.ab..d5.c				ENSG00000187672.8	ENSG00000187672	ERC2	-2.65858	0.00605354	d7.ab..d7.c				ENSG00000109654.10	ENSG00000109654	TRIM2	-0.897991	0.0182038	d10.ab..d10.c
ENSG00000140463.9	ENSG00000140463	BBS4	1.15662	0.0316407	d0.a..d0.b			ENSG00000134748.12	ENSG00000134748	PRPF38A	1.48877	0.00901245	d1.a..d1.c			ENSG00000138759.13	ENSG00000138759	FRAS1	1.61998	0.0127248	d1.b..d1.a		ENSG00000101489.14	ENSG00000101489	CELF4	-2.8193	0.00793175	d5.ab..d5.c				ENSG00000113140.6	ENSG00000113140	SPARC	1.11595	0.00605986	d7.ab..d7.c				ENSG00000121989.10	ENSG00000121989	ACVR2A	-0.964508	0.0182535	d10.ab..d10.c
ENSG00000184009.5	ENSG00000184009	ACTG1	-0.462648	0.0321972	d0.a..d0.b			ENSG00000171714.10	ENSG00000171714	ANO5	3.2753	0.00914376	d1.a..d1.c			ENSG00000114279.9	ENSG00000114279	FGF12	-2.51262	0.0129782	d1.b..d1.a		ENSG00000250208.2	ENSG00000250208	FZD10-AS1	2.6226	0.00800205	d5.ab..d5.c				ENSG00000181026.13	ENSG00000181026	AEN	2.06778	0.00613699	d7.ab..d7.c				ENSG00000146938.10	ENSG00000146938	NLGN4X	-2.02879	0.0174981	d10.ab..d10.c
ENSG00000105053.6	ENSG00000105053	VRK3	-2.67675	0.0322925	d0.a..d0.b			ENSG00000164211.8	ENSG00000164211	STARD4	2.44821	0.00938905	d1.a..d1.c			ENSG00000137872.11	ENSG00000137872	SEMA6D	-1.45468	0.0133354	d1.b..d1.a		ENSG00000105392.11	ENSG00000105392	CRX	-2.0653	0.0080042	d5.ab..d5.c				ENSG00000166716.5	ENSG00000166716	ZNF592	3.80735	0.00614455	d7.ab..d7.c				ENSG00000152527.9	ENSG00000152527	PLEKHH2	2.39464	0.0180594	d10.ab..d10.c
ENSG00000082641.11	ENSG00000082641	NFE2L1	2.74284	0.0329093	d0.a..d0.b			ENSG00000146263.7	ENSG00000146263	MMS22L	1.35644	0.00944107	d1.a..d1.c			ENSG00000117650.8	ENSG00000117650	NEK2	-2.18202	0.0133394	d1.b..d1.a		ENSG00000269746.1	ENSG00000269746		-2.36034	0.00806473	d5.ab..d5.c				ENSG00000157551.13	ENSG00000157551	KCNJ15	-2.13343	0.00617251	d7.ab..d7.c				ENSG00000159788.14	ENSG00000159788	RGS12	-3.09308	0.0176569	d10.ab..d10.c
ENSG00000129515.14	ENSG00000129515	SNX6	-0.89225	0.0329252	d0.a..d0.b			ENSG00000164611.8	ENSG00000164611	PTTG1	1.8527	0.00960482	d1.a..d1.c			ENSG00000153721.13	ENSG00000153721	CNKSR3	-1.15713	0.0134156	d1.b..d1.a		ENSG00000162188.5	ENSG00000162188	GNG3	-3.73721	0.00826072	d5.ab..d5.c				ENSG00000196361.5	ENSG00000196361	ELAVL3	-3.41348	0.00618299	d7.ab..d7.c				ENSG00000162769.8	ENSG00000162769	FLVCR1	-1.66295	0.0177246	d10.ab..d10.c
ENSG00000131016.12	ENSG00000131016	AKAP12	0.660926	0.0332102	d0.a..d0.b			ENSG00000144554.6	ENSG00000144554	FANCD2	1.68728	0.00961308	d1.a..d1.c			ENSG00000118257.12	ENSG00000118257	NRP2	-2.08283	0.0135278	d1.b..d1.a		ENSG00000178691.6	ENSG00000178691	SUZ12	1.96695	0.00867736	d5.ab..d5.c				ENSG00000161800.8	ENSG00000161800	RACGAP1	2.62576	0.00622593	d7.ab..d7.c				ENSG00000175985.8	ENSG00000175985	PLEKHD1	-2.06205	0.0173987	d10.ab..d10.c
ENSG00000231259.3	ENSG00000231259		-2.01582	0.0334269	d0.a..d0.b			ENSG00000080824.14	ENSG00000080824	HSP90AA1	0.992516	0.00973281	d1.a..d1.c			ENSG00000196205.7	ENSG00000196205	EEF1A1P5	0.330608	0.0137878	d1.b..d1.a		ENSG00000101198.10	ENSG00000101198	NKAIN4	-2.45869	0.00878593	d5.ab..d5.c				ENSG00000214135.4	ENSG00000214135		-2.59293	0.00628324	d7.ab..d7.c				ENSG00000204176.9	ENSG00000204176	SYT15	-2.46116	0.0171981	d10.ab..d10.c
ENSG00000185361.4	ENSG00000185361	TNFAIP8L1	-2.74284	0.0337413	d0.a..d0.b			ENSG00000145362.12	ENSG00000145362	ANK2	-2.67979	0.00976066	d1.a..d1.c			ENSG00000166923.6	ENSG00000166923	GREM1	-2.31426	0.0140105	d1.b..d1.a		ENSG00000089685.10	ENSG00000089685	BIRC5	1.24574	0.00878799	d5.ab..d5.c				ENSG00000143850.8	ENSG00000143850	PLEKHA6	-3.08526	0.00629733	d7.ab..d7.c				ENSG00000149636.11	ENSG00000149636	DSN1	2.62745	0.0177579	d10.ab..d10.c
ENSG00000065154.7	ENSG00000065154	OAT	1.18967	0.0337648	d0.a..d0.b			ENSG00000154144.8	ENSG00000154144	TBRG1	-2.38204	0.00999025	d1.a..d1.c			ENSG00000180806.4	ENSG00000180806	HOXC9	-2.38038	0.0141391	d1.b..d1.a		ENSG00000198237.7	ENSG00000198237		-2.19643	0.00907941	d5.ab..d5.c				ENSG00000106648.9	ENSG00000106648	GALNTL5	-2.56011	0.00636452	d7.ab..d7.c				ENSG00000197182.8	ENSG00000197182	MIRLET7BHG	-2.09531	0.0186378	d10.ab..d10.c
ENSG00000148200.12	ENSG00000148200	NR6A1	-0.528741	0.0338287	d0.a..d0.b			ENSG00000024862.12	ENSG00000024862	CCDC28A	4.40015	0.0100576	d1.a..d1.c			ENSG00000181894.10	ENSG00000181894	ZNF329	2.64487	0.0143653	d1.b..d1.a		ENSG00000118496.4	ENSG00000118496	FBXO30	2.45869	0.0092445	d5.ab..d5.c				ENSG00000254044.1	ENSG00000254044		-3.15091	0.00653487	d7.ab..d7.c				ENSG00000151150.16	ENSG00000151150	ANK3	-1.52991	0.0188611	d10.ab..d10.c
ENSG00000118971.3	ENSG00000118971	CCND2	0.660926	0.0340073	d0.a..d0.b			ENSG00000130517.9	ENSG00000130517	PGPEP1	-3.70539	0.0103296	d1.a..d1.c			ENSG00000119139.12	ENSG00000119139	TJP2	-1.85141	0.014646	d1.b..d1.a		ENSG00000264423.1	ENSG00000264423	RN7SL718P	-2.0653	0.00927405	d5.ab..d5.c				ENSG00000153283.8	ENSG00000153283	CD96	-2.26471	0.00673102	d7.ab..d7.c				ENSG00000084453.12	ENSG00000084453	SLCO1A2	-2.72723	0.0193221	d10.ab..d10.c
ENSG00000112234.4	ENSG00000112234	FBXL4	2.11496	0.0344022	d0.a..d0.b			ENSG00000153904.14	ENSG00000153904	DDAH1	1.45569	0.0105414	d1.a..d1.c			ENSG00000117122.9	ENSG00000117122	MFAP2	-0.7604	0.0147145	d1.b..d1.a		ENSG00000253816.2	ENSG00000253816		-2.16365	0.00942445	d5.ab..d5.c				ENSG00000171302.12	ENSG00000171302	CANT1	4.46379	0.00689366	d7.ab..d7.c				ENSG00000183506.12	ENSG00000183506	PI4KAP2	-2.36138	0.0194536	d10.ab..d10.c
ENSG00000110042.3	ENSG00000110042	DTX4	-1.65231	0.0349016	d0.a..d0.b			ENSG00000103642.7	ENSG00000103642	LACTB	-4.83024	0.0105582	d1.a..d1.c			ENSG00000197747.4	ENSG00000197747	S100A10	-2.38038	0.0148231	d1.b..d1.a		ENSG00000131149.13	ENSG00000131149	GSE1	-2.0653	0.00947502	d5.ab..d5.c				ENSG00000138658.11	ENSG00000138658	ZGRF1	1.87085	0.0069955	d7.ab..d7.c				ENSG00000269473.1	ENSG00000269473		-2.29486	0.0194563	d10.ab..d10.c
ENSG00000117906.9	ENSG00000117906	RCN2	1.25576	0.0353708	d0.a..d0.b			ENSG00000149289.6	ENSG00000149289	ZC3H12C	-2.54746	0.010622	d1.a..d1.c			ENSG00000182667.10	ENSG00000182667	NTM	-1.88447	0.0148733	d1.b..d1.a		ENSG00000169744.8	ENSG00000169744	LDB2	3.08156	0.0100241	d5.ab..d5.c				ENSG00000186868.11	ENSG00000186868	MAPT	-3.18373	0.00704918	d7.ab..d7.c				ENSG00000149179.9	ENSG00000149179	C11orf49	2.72723	0.0193864	d10.ab..d10.c
ENSG00000169213.6	ENSG00000169213	RAB3B	0.760065	0.0361517	d0.a..d0.b			ENSG00000233476.2	ENSG00000233476	EEF1A1P6	-0.794012	0.0106361	d1.a..d1.c			ENSG00000089157.11	ENSG00000089157	RPLP0	0.363669	0.0150969	d1.b..d1.a		ENSG00000258947.2	ENSG00000258947	TUBB3	-3.63886	0.0101649	d5.ab..d5.c				ENSG00000110880.6	ENSG00000110880	CORO1C	-1.31288	0.007089	d7.ab..d7.c				ENSG00000112531.12	ENSG00000112531	QKI	0.864732	0.0197909	d10.ab..d10.c
ENSG00000189091.8	ENSG00000189091	SF3B3	-0.991389	0.0364087	d0.a..d0.b			ENSG00000152583.8	ENSG00000152583	SPARCL1	6.61677	0.0106722	d1.a..d1.c			ENSG00000150471.11	ENSG00000150471	ADGRL3	1.38856	0.0151766	d1.b..d1.a		ENSG00000104490.13	ENSG00000104490	NCALD	-1.08182	0.0102131	d5.ab..d5.c				ENSG00000267284.1	ENSG00000267284		-2.396	0.00715411	d7.ab..d7.c				ENSG00000136960.8	ENSG00000136960	ENPP2	1.96228	0.0196681	d10.ab..d10.c
ENSG00000113460.8	ENSG00000113460	BRIX1	-0.727018	0.0366397	d0.a..d0.b			ENSG00000176887.5	ENSG00000176887	SOX11	-1.0256	0.0107167	d1.a..d1.c			ENSG00000256463.4	ENSG00000256463	SALL3	-1.88447	0.0152087	d1.b..d1.a		ENSG00000134533.2	ENSG00000134533	RERG	-2.0653	0.0103338	d5.ab..d5.c				ENSG00000269821.1	ENSG00000269821	KCNQ1OT1	-0.886193	0.0073039	d7.ab..d7.c				ENSG00000239665.4	ENSG00000239665		-2.49442	0.0198473	d10.ab..d10.c
ENSG00000157570.7	ENSG00000157570	TSPAN18	-2.24715	0.0371255	d0.a..d0.b			ENSG00000101224.13	ENSG00000101224	CDC25B	-2.67979	0.0107653	d1.a..d1.c			ENSG00000112984.7	ENSG00000112984	KIF20A	-1.65304	0.0154902	d1.b..d1.a		ENSG00000130522.4	ENSG00000130522	JUND	-1.80304	0.0103894	d5.ab..d5.c				ENSG00000176641.6	ENSG00000176641	RNF152	-2.95398	0.00737447	d7.ab..d7.c				ENSG00000219200.6	ENSG00000219200	RNASEK	-2.4279	0.0201496	d10.ab..d10.c
ENSG00000135315.7	ENSG00000135315	CEP162	1.65231	0.0375359	d0.a..d0.b			ENSG00000013810.14	ENSG00000013810	TACC3	4.40015	0.0111726	d1.a..d1.c			ENSG00000164778.4	ENSG00000164778	EN2	2.08283	0.0156044	d1.b..d1.a		ENSG00000254701.2	ENSG00000254701		-2.09808	0.0104547	d5.ab..d5.c				ENSG00000172915.14	ENSG00000172915	NBEA	-1.80521	0.00737845	d7.ab..d7.c				ENSG00000119969.10	ENSG00000119969	HELLS	1.09754	0.0205256	d10.ab..d10.c
ENSG00000184831.9	ENSG00000184831	APOO	1.85059	0.0376106	d0.a..d0.b			ENSG00000092820.13	ENSG00000092820	EZR	1.8527	0.0112012	d1.a..d1.c			ENSG00000124766.4	ENSG00000124766	SOX4	0.462852	0.0156638	d1.b..d1.a		ENSG00000112531.12	ENSG00000112531	QKI	0.852346	0.0106416	d5.ab..d5.c				ENSG00000152503.5	ENSG00000152503	TRIM36	-1.77239	0.00743855	d7.ab..d7.c				ENSG00000173402.7	ENSG00000173402	DAG1	3.69174	0.0205651	d10.ab..d10.c
ENSG00000174574.11	ENSG00000174574	AKIRIN1	-1.85059	0.0379907	d0.a..d0.b			ENSG00000077279.12	ENSG00000077279	DCX	-2.77904	0.0112312	d1.a..d1.c			ENSG00000233476.2	ENSG00000233476	EEF1A1P6	0.363669	0.0157139	d1.b..d1.a		ENSG00000260473.1	ENSG00000260473		-2.45869	0.0107272	d5.ab..d5.c				ENSG00000182670.9	ENSG00000182670	TTC3	-0.689261	0.00746758	d7.ab..d7.c				ENSG00000120029.8	ENSG00000120029	C10orf76	-3.32589	0.0208271	d10.ab..d10.c
ENSG00000104368.13	ENSG00000104368	PLAT	-2.31324	0.0384713	d0.a..d0.b			ENSG00000070950.5	ENSG00000070950	RAD18	4.20165	0.0112444	d1.a..d1.c			ENSG00000125398.5	ENSG00000125398	SOX9	-2.2812	0.0157169	d1.b..d1.a		ENSG00000151240.11	ENSG00000151240	DIP2C	-2.36034	0.0107502	d5.ab..d5.c				ENSG00000169855.15	ENSG00000169855	ROBO1	-1.77239	0.0076125	d7.ab..d7.c				ENSG00000065328.12	ENSG00000065328	MCM10	2.16183	0.020969	d10.ab..d10.c
ENSG00000137547.4	ENSG00000137547	MRPL15	-1.28881	0.0386087	d0.a..d0.b			ENSG00000134376.10	ENSG00000134376	CRB1	-5.02875	0.0112813	d1.a..d1.c			ENSG00000180818.4	ENSG00000180818	HOXC10	-2.2812	0.016025	d1.b..d1.a		ENSG00000188305.4	ENSG00000188305	C19orf35	-2.6226	0.0107551	d5.ab..d5.c				ENSG00000254377.1	ENSG00000254377	MIR124-2HG	-1.80521	0.00775265	d7.ab..d7.c				ENSG00000003987.9	ENSG00000003987	MTMR7	-3.32589	0.0217356	d10.ab..d10.c
ENSG00000234231.2	ENSG00000234231		-1.7845	0.0386239	d0.a..d0.b			ENSG00000112972.10	ENSG00000112972	HMGCS1	1.2241	0.0114578	d1.a..d1.c			ENSG00000107897.14	ENSG00000107897	ACBD5	-1.88447	0.0162376	d1.b..d1.a		ENSG00000213420.3	ENSG00000213420	GPC2	-2.8193	0.0107781	d5.ab..d5.c				ENSG00000182534.9	ENSG00000182534	MXRA7	-2.6914	0.00797358	d7.ab..d7.c				ENSG00000065609.10	ENSG00000065609	SNAP91	-3.32589	0.0222466	d10.ab..d10.c
ENSG00000106066.9	ENSG00000106066	CPVL	1.7845	0.0388029	d0.a..d0.b			ENSG00000135506.11	ENSG00000135506	OS9	-1.95195	0.0114796	d1.a..d1.c			ENSG00000185885.11	ENSG00000185885	IFITM1	-1.48774	0.0162611	d1.b..d1.a		ENSG00000128594.3	ENSG00000128594	LRRC4	2.29478	0.0108263	d5.ab..d5.c				ENSG00000170906.11	ENSG00000170906	NDUFA3	-2.36318	0.00817192	d7.ab..d7.c				ENSG00000104725.9	ENSG00000104725		-2.49442	0.0217455	d10.ab..d10.c
ENSG00000188647.8	ENSG00000188647	PTAR1	-1.55318	0.0389392	d0.a..d0.b			ENSG00000123485.7	ENSG00000123485	HJURP	2.41512	0.0115013	d1.a..d1.c			ENSG00000157800.13	ENSG00000157800	SLC37A3	1.6861	0.0163771	d1.b..d1.a		ENSG00000205572.5	ENSG00000205572	SERF1B	-2.03252	0.0110046	d5.ab..d5.c				ENSG00000134533.2	ENSG00000134533	RERG	-2.42882	0.00827078	d7.ab..d7.c				ENSG00000163531.11	ENSG00000163531	NFASC	-2.9933	0.021948	d10.ab..d10.c
ENSG00000092607.9	ENSG00000092607	TBX15	1.85059	0.0394863	d0.a..d0.b			ENSG00000128849.9	ENSG00000128849	CGNL1	4.46632	0.0115581	d1.a..d1.c			ENSG00000132463.9	ENSG00000132463	GRSF1	0.958765	0.0164185	d1.b..d1.a		ENSG00000183648.5	ENSG00000183648	NDUFB1	-1.86861	0.0111417	d5.ab..d5.c				ENSG00000271430.1	ENSG00000271430		-1.28006	0.00840921	d7.ab..d7.c				ENSG00000176641.6	ENSG00000176641	RNF152	-3.22611	0.0219936	d10.ab..d10.c
ENSG00000140455.12	ENSG00000140455	USP3	-1.02443	0.0395162	d0.a..d0.b			ENSG00000184886.3	ENSG00000184886		4.33398	0.0118159	d1.a..d1.c			ENSG00000249242.3	ENSG00000249242	TMEM150C	1.78529	0.016752	d1.b..d1.a		ENSG00000205593.7	ENSG00000205593	DENND6B	-2.91765	0.0111477	d5.ab..d5.c				ENSG00000121989.10	ENSG00000121989	ACVR2A	-1.18159	0.0086526	d7.ab..d7.c				ENSG00000188732.6	ENSG00000188732	FAM221A	-2.59419	0.0216005	d10.ab..d10.c
ENSG00000139364.6	ENSG00000139364	TMEM132B	-1.52013	0.0397711	d0.a..d0.b			ENSG00000155592.11	ENSG00000155592	ZKSCAN2	4.86333	0.0123435	d1.a..d1.c			ENSG00000041982.10	ENSG00000041982	TNC	-1.85141	0.0168885	d1.b..d1.a		ENSG00000226415.1	ENSG00000226415	TPI1P1	-1.83582	0.0111917	d5.ab..d5.c				ENSG00000221953.2	ENSG00000221953	C1orf229	-2.62576	0.00875291	d7.ab..d7.c				ENSG00000198168.4	ENSG00000198168	SVIP	-2.52768	0.0222003	d10.ab..d10.c
ENSG00000020922.8	ENSG00000020922	MRE11	-1.88364	0.0399687	d0.a..d0.b			ENSG00000018699.7	ENSG00000018699	TTC27	4.20165	0.0123939	d1.a..d1.c			ENSG00000184384.9	ENSG00000184384	MAML2	2.04977	0.0170221	d1.b..d1.a		ENSG00000205542.6	ENSG00000205542	TMSB4X	-0.590086	0.0113717	d5.ab..d5.c				ENSG00000151503.8	ENSG00000151503	NCAPD3	5.57973	0.00877292	d7.ab..d7.c				ENSG00000272955.1	ENSG00000272955		-2.46116	0.0222982	d10.ab..d10.c
ENSG00000175898.4	ENSG00000175898		-0.760065	0.0407734	d0.a..d0.b			ENSG00000135476.7	ENSG00000135476	ESPL1	4.3009	0.0124592	d1.a..d1.c			ENSG00000132388.8	ENSG00000132388	UBE2G1	-0.7604	0.0171714	d1.b..d1.a		ENSG00000008710.13	ENSG00000008710	PKD1	-2.55704	0.0118595	d5.ab..d5.c				ENSG00000101447.9	ENSG00000101447	FAM83D	5.48127	0.00879138	d7.ab..d7.c				ENSG00000082684.10	ENSG00000082684	SEMA5B	2.29486	0.0223988	d10.ab..d10.c
ENSG00000187955.7	ENSG00000187955	COL14A1	-1.61927	0.0408403	d0.a..d0.b			ENSG00000165861.9	ENSG00000165861	ZFYVE1	-2.71288	0.0125067	d1.a..d1.c			ENSG00000118971.3	ENSG00000118971	CCND2	-0.694278	0.0172495	d1.b..d1.a		ENSG00000234597.1	ENSG00000234597		-2.68817	0.0119632	d5.ab..d5.c				ENSG00000188305.4	ENSG00000188305	C19orf35	-2.56011	0.00879207	d7.ab..d7.c				ENSG00000180771.10	ENSG00000180771		-2.4279	0.0227086	d10.ab..d10.c
ENSG00000250742.1	ENSG00000250742	LINC02381	1.61927	0.0421823	d0.a..d0.b			ENSG00000159131.12	ENSG00000159131	GART	1.52186	0.0125786	d1.a..d1.c			ENSG00000040199.14	ENSG00000040199	PHLPP2	-1.98365	0.0173028	d1.b..d1.a		ENSG00000250746.1	ENSG00000250746		-1.96695	0.0124787	d5.ab..d5.c				ENSG00000151725.7	ENSG00000151725	CENPU	1.87085	0.00880791	d7.ab..d7.c				ENSG00000114796.11	ENSG00000114796	KLHL24	-1.6962	0.0231345	d10.ab..d10.c
ENSG00000075213.6	ENSG00000075213	SEMA3A	1.09053	0.0422092	d0.a..d0.b			ENSG00000137573.9	ENSG00000137573	SULF1	-2.54746	0.0126076	d1.a..d1.c			ENSG00000077782.15	ENSG00000077782	FGFR1	-0.694278	0.0173335	d1.b..d1.a		ENSG00000205629.7	ENSG00000205629	LCMT1	-1.54078	0.0124922	d5.ab..d5.c				ENSG00000156671.8	ENSG00000156671	SAMD8	-1.80521	0.00890475	d7.ab..d7.c				ENSG00000148798.5	ENSG00000148798	INA	-2.36138	0.02303	d10.ab..d10.c
ENSG00000129244.4	ENSG00000129244	ATP1B2	1.68536	0.0424206	d0.a..d0.b			ENSG00000131238.12	ENSG00000131238	PPT1	1.05868	0.0126707	d1.a..d1.c			ENSG00000187653.10	ENSG00000187653	TMSB4XP8	0.826521	0.017423	d1.b..d1.a		ENSG00000166974.8	ENSG00000166974	MAPRE2	-1.70469	0.012652	d5.ab..d5.c				ENSG00000146263.7	ENSG00000146263	MMS22L	1.08312	0.00892081	d7.ab..d7.c				ENSG00000259752.1	ENSG00000259752		-2.06205	0.0231392	d10.ab..d10.c
ENSG00000149187.13	ENSG00000149187	CELF1	-0.859203	0.0425541	d0.a..d0.b			ENSG00000110693.11	ENSG00000110693	SOX6	4.3009	0.0127394	d1.a..d1.c			ENSG00000138119.12	ENSG00000138119	MYOF	-1.81835	0.0175933	d1.b..d1.a		ENSG00000120860.6	ENSG00000120860	WASHC3	-2.19643	0.0126696	d5.ab..d5.c				ENSG00000236438.2	ENSG00000236438	FAM157A	-2.33036	0.00907508	d7.ab..d7.c				ENSG00000170522.5	ENSG00000170522	ELOVL6	-0.897991	0.0236566	d10.ab..d10.c
ENSG00000127334.10	ENSG00000127334	DYRK2	-1.55318	0.0426317	d0.a..d0.b			ENSG00000145016.9	ENSG00000145016	RUBCN	-1.52186	0.0128882	d1.a..d1.c			ENSG00000115840.9	ENSG00000115840	SLC25A12	1.98365	0.0176317	d1.b..d1.a		ENSG00000267809.1	ENSG00000267809	NDUFV2P1	-1.90139	0.012721	d5.ab..d5.c				ENSG00000266821.1	ENSG00000266821		-2.33036	0.00930655	d7.ab..d7.c				ENSG00000267834.1	ENSG00000267834		-1.89576	0.023639	d10.ab..d10.c
ENSG00000075624.9	ENSG00000075624	ACTB	-0.363509	0.0431043	d0.a..d0.b			ENSG00000124942.9	ENSG00000124942	AHNAK	2.38204	0.0129155	d1.a..d1.c			ENSG00000173218.10	ENSG00000173218	VANGL1	-2.18202	0.0176561	d1.b..d1.a		ENSG00000205323.4	ENSG00000205323	SARNP	-2.16365	0.0128335	d5.ab..d5.c				ENSG00000132780.12	ENSG00000132780	NASP	0.919015	0.00941528	d7.ab..d7.c				ENSG00000163637.7	ENSG00000163637	PRICKLE2	-2.89353	0.0241455	d10.ab..d10.c
ENSG00000253352.4	ENSG00000253352	TUG1	0.793111	0.043351	d0.a..d0.b			ENSG00000167601.7	ENSG00000167601	AXL	1.2241	0.0132868	d1.a..d1.c			ENSG00000169813.12	ENSG00000169813	HNRNPF	0.79346	0.0176669	d1.b..d1.a		ENSG00000232406.2	ENSG00000232406		-2.262	0.0128614	d5.ab..d5.c				ENSG00000163539.11	ENSG00000163539	CLASP2	-1.57545	0.00942809	d7.ab..d7.c				ENSG00000198899.2	ENSG00000198899	MT-ATP6	0.731696	0.0242032	d10.ab..d10.c
ENSG00000148572.10	ENSG00000148572	NRBF2	-1.61927	0.0440477	d0.a..d0.b			ENSG00000147324.6	ENSG00000147324	MFHAS1	2.01811	0.0133263	d1.a..d1.c			ENSG00000004897.7	ENSG00000004897	CDC27	-1.22325	0.0181466	d1.b..d1.a		ENSG00000233057.1	ENSG00000233057	EEF1A1P14	-2.58982	0.0130752	d5.ab..d5.c				ENSG00000147488.7	ENSG00000147488	ST18	-3.2822	0.00943652	d7.ab..d7.c				ENSG00000168411.9	ENSG00000168411	RFWD3	2.26161	0.0242298	d10.ab..d10.c
ENSG00000148154.5	ENSG00000148154	UGCG	0.693972	0.0442634	d0.a..d0.b			ENSG00000114251.9	ENSG00000114251	WNT5A	2.81213	0.0133798	d1.a..d1.c			ENSG00000254184.3	ENSG00000254184		2.18202	0.0182439	d1.b..d1.a		ENSG00000167703.10	ENSG00000167703	SLC43A2	-1.86861	0.0132555	d5.ab..d5.c				ENSG00000178425.9	ENSG00000178425	NT5DC1	5.3828	0.00967414	d7.ab..d7.c				ENSG00000078699.17	ENSG00000078699	CBFA2T2	-2.82701	0.0258818	d10.ab..d10.c
ENSG00000204084.8	ENSG00000204084	INPP5B	-1.55318	0.0447305	d0.a..d0.b			ENSG00000139767.4	ENSG00000139767	SRRM4	-2.38204	0.0133805	d1.a..d1.c			ENSG00000008394.8	ENSG00000008394	MGST1	0.727339	0.0182866	d1.b..d1.a		ENSG00000248932.1	ENSG00000248932		3.96669	0.0134501	d5.ab..d5.c				ENSG00000253366.2	ENSG00000253366		-2.26471	0.00978248	d7.ab..d7.c				ENSG00000094916.9	ENSG00000094916	CBX5	0.665178	0.0250933	d10.ab..d10.c
ENSG00000214455.3	ENSG00000214455	RCN1P2	1.75145	0.0450846	d0.a..d0.b			ENSG00000177169.5	ENSG00000177169	ULK1	4.73099	0.0134355	d1.a..d1.c			ENSG00000139116.13	ENSG00000139116	KIF21A	0.826521	0.0183132	d1.b..d1.a		ENSG00000137860.7	ENSG00000137860	SLC28A2	-2.72095	0.0134905	d5.ab..d5.c				ENSG00000198830.6	ENSG00000198830	HMGN2	0.787727	0.00982257	d7.ab..d7.c				ENSG00000113140.6	ENSG00000113140	SPARC	1.06429	0.0256579	d10.ab..d10.c
ENSG00000176771.11	ENSG00000176771	NCKAP5	-1.98278	0.0452394	d0.a..d0.b			ENSG00000089157.11	ENSG00000089157	RPLP0	-0.760929	0.0136187	d1.a..d1.c			ENSG00000184349.8	ENSG00000184349	EFNA5	0.562034	0.0183469	d1.b..d1.a		ENSG00000215630.5	ENSG00000215630	GUSBP9	-1.86861	0.013501	d5.ab..d5.c				ENSG00000088325.11	ENSG00000088325	TPX2	1.67392	0.00986183	d7.ab..d7.c				ENSG00000141933.8	ENSG00000141933	TPGS1	-2.06205	0.0249294	d10.ab..d10.c
ENSG00000131484.3	ENSG00000131484		1.61927	0.0454787	d0.a..d0.b			ENSG00000148516.17	ENSG00000148516	ZEB1	-1.25719	0.0136704	d1.a..d1.c			ENSG00000166598.8	ENSG00000166598	HSP90B1	-0.562034	0.0184687	d1.b..d1.a		ENSG00000138658.11	ENSG00000138658	ZGRF1	1.80304	0.0136692	d5.ab..d5.c				ENSG00000138162.13	ENSG00000138162	TACC2	-2.06778	0.0101416	d7.ab..d7.c				ENSG00000144724.14	ENSG00000144724	PTPRG	-2.06205	0.0254478	d10.ab..d10.c
ENSG00000176542.5	ENSG00000176542	USF3	-1.25576	0.0463686	d0.a..d0.b			ENSG00000110048.7	ENSG00000110048	OSBP	3.50689	0.013921	d1.a..d1.c			ENSG00000103942.8	ENSG00000103942	HOMER2	1.85141	0.0186735	d1.b..d1.a		ENSG00000149243.11	ENSG00000149243	KLHL35	-3.34382	0.0138754	d5.ab..d5.c				ENSG00000240563.1	ENSG00000240563	L1TD1	-2.13343	0.0103826	d7.ab..d7.c				ENSG00000151632.12	ENSG00000151632	AKR1C2	-2.66071	0.0259822	d10.ab..d10.c
ENSG00000104490.13	ENSG00000104490	NCALD	-1.02443	0.0464169	d0.a..d0.b			ENSG00000051825.10	ENSG00000051825	MPHOSPH9	1.91886	0.0140524	d1.a..d1.c			ENSG00000170522.5	ENSG00000170522	ELOVL6	0.495913	0.0191634	d1.b..d1.a		ENSG00000183684.6	ENSG00000183684	ALYREF	-2.49147	0.013949	d5.ab..d5.c				ENSG00000240618.1	ENSG00000240618		-3.15091	0.0103927	d7.ab..d7.c				ENSG00000203325.3	ENSG00000203325		-3.32589	0.024695	d10.ab..d10.c
ENSG00000157542.8	ENSG00000157542	KCNJ6	-1.81755	0.0471912	d0.a..d0.b			ENSG00000109046.10	ENSG00000109046	WSB1	-0.926348	0.0140778	d1.a..d1.c			ENSG00000140987.15	ENSG00000140987	ZSCAN32	-2.51262	0.0193369	d1.b..d1.a		ENSG00000103489.7	ENSG00000103489	XYLT1	2.09808	0.0141252	d5.ab..d5.c				ENSG00000173207.8	ENSG00000173207	CKS1B	1.11595	0.0104468	d7.ab..d7.c				ENSG00000203620.2	ENSG00000203620		-1.8625	0.0252223	d10.ab..d10.c
ENSG00000118276.7	ENSG00000118276	B4GALT6	2.24715	0.0480112	d0.a..d0.b			ENSG00000157456.3	ENSG00000157456	CCNB2	2.91138	0.014124	d1.a..d1.c			ENSG00000155980.7	ENSG00000155980	KIF5A	1.71916	0.0199122	d1.b..d1.a		ENSG00000170989.8	ENSG00000170989	S1PR1	1.508	0.014275	d5.ab..d5.c				ENSG00000143702.11	ENSG00000143702	CEP170	-1.28006	0.0106193	d7.ab..d7.c				ENSG00000213885.3	ENSG00000213885	RPL13AP7	-2.09531	0.0248982	d10.ab..d10.c
ENSG00000171453.13	ENSG00000171453	POLR1C	-0.958342	0.0485069	d0.a..d0.b			ENSG00000198876.8	ENSG00000198876	DCAF12	1.72036	0.0141571	d1.a..d1.c			ENSG00000102384.9	ENSG00000102384	CENPI	-2.01671	0.0202989	d1.b..d1.a		ENSG00000117707.11	ENSG00000117707	PROX1	-2.0653	0.014413	d5.ab..d5.c				ENSG00000206579.7	ENSG00000206579	XKR4	-2.49447	0.0106662	d7.ab..d7.c				ENSG00000224032.2	ENSG00000224032	EPB41L4A-AS1	-2.89353	0.0256441	d10.ab..d10.c
ENSG00000101444.8	ENSG00000101444	AHCY	-0.660926	0.0485406	d0.a..d0.b			ENSG00000147852.11	ENSG00000147852	VLDLR	-3.17605	0.0143733	d1.a..d1.c			ENSG00000110321.11	ENSG00000110321	EIF4G2	-0.495913	0.0203777	d1.b..d1.a		ENSG00000116525.9	ENSG00000116525	TRIM62	-3.67165	0.0145117	d5.ab..d5.c				ENSG00000143257.7	ENSG00000143257	NR1I3	-1.96932	0.0107009	d7.ab..d7.c				ENSG00000229117.4	ENSG00000229117	RPL41	0.631919	0.0259363	d10.ab..d10.c
ENSG00000163155.7	ENSG00000163155	LYSMD1	1.94973	0.0486323	d0.a..d0.b			ENSG00000171533.7	ENSG00000171533	MAP6	-2.64671	0.0148198	d1.a..d1.c			ENSG00000134762.12	ENSG00000134762	DSC3	-2.11589	0.0204341	d1.b..d1.a		ENSG00000254206.1	ENSG00000254206	NPIPB11	-1.90139	0.0145888	d5.ab..d5.c				ENSG00000099624.3	ENSG00000099624	ATP5D	-2.10061	0.0107181	d7.ab..d7.c				ENSG00000258225.1	ENSG00000258225		-1.99553	0.0248325	d10.ab..d10.c
ENSG00000178662.11	ENSG00000178662	CSRNP3	-1.22271	0.0487092	d0.a..d0.b			ENSG00000137502.5	ENSG00000137502	RAB30	-3.57306	0.0148669	d1.a..d1.c			ENSG00000110042.3	ENSG00000110042	DTX4	0.727339	0.0205916	d1.b..d1.a		ENSG00000108654.7	ENSG00000108654	DDX5	-0.458956	0.0146161	d5.ab..d5.c				ENSG00000213260.3	ENSG00000213260	YWHAZP5	-2.03496	0.0107409	d7.ab..d7.c				ENSG00000162408.10	ENSG00000162408	NOL9	2.02879	0.026283	d10.ab..d10.c
ENSG00000103449.7	ENSG00000103449	SALL1	1.09053	0.0489603	d0.a..d0.b			ENSG00000160097.11	ENSG00000160097	FNDC5	-4.03623	0.0150144	d1.a..d1.c			ENSG00000106829.14	ENSG00000106829	TLE4	-0.859582	0.0207874	d1.b..d1.a		ENSG00000115355.11	ENSG00000115355	CCDC88A	-0.885129	0.0146522	d5.ab..d5.c				ENSG00000066583.7	ENSG00000066583	ISOC1	5.31716	0.0109821	d7.ab..d7.c				ENSG00000090932.6	ENSG00000090932	DLL3	-3.02656	0.0268852	d10.ab..d10.c
ENSG00000166130.10	ENSG00000166130	IKBIP	2.11496	0.0490085	d0.a..d0.b			ENSG00000196220.11	ENSG00000196220	SRGAP3	-1.52186	0.0152661	d1.a..d1.c			ENSG00000246705.3	ENSG00000246705	H2AFJ	-1.98365	0.0210785	d1.b..d1.a		ENSG00000214645.3	ENSG00000214645		-1.90139	0.0147411	d5.ab..d5.c				ENSG00000231532.1	ENSG00000231532	LINC01249	-3.08526	0.0109877	d7.ab..d7.c				ENSG00000134291.7	ENSG00000134291	TMEM106C	1.16406	0.0266249	d10.ab..d10.c
ENSG00000139116.13	ENSG00000139116	KIF21A	-1.09053	0.0499613	d0.a..d0.b			ENSG00000130305.12	ENSG00000130305	NSUN5	-2.21662	0.0158198	d1.a..d1.c			ENSG00000166398.8	ENSG00000166398	KIAA0355	1.38856	0.0211727	d1.b..d1.a		ENSG00000228532.2	ENSG00000228532		-1.86861	0.0148216	d5.ab..d5.c				ENSG00000197182.8	ENSG00000197182	MIRLET7BHG	-1.83803	0.0110955	d7.ab..d7.c				ENSG00000140279.8	ENSG00000140279	DUOX2	-1.92902	0.0269964	d10.ab..d10.c
								ENSG00000076356.6	ENSG00000076356	PLXNA2	-2.74596	0.0158938	d1.a..d1.c			ENSG00000182481.4	ENSG00000182481	KPNA2	-0.628156	0.0212435	d1.b..d1.a		ENSG00000253230.2	ENSG00000253230	LINC00599	-7.04825	0.0148452	d5.ab..d5.c				ENSG00000163364.5	ENSG00000163364	LINC01116	-1.87085	0.011167	d7.ab..d7.c				ENSG00000132286.7	ENSG00000132286	TIMM10B	1.79598	0.0269317	d10.ab..d10.c
								ENSG00000184708.13	ENSG00000184708	EIF4ENIF1	4.16857	0.0159994	d1.a..d1.c			ENSG00000206579.7	ENSG00000206579	XKR4	-1.58692	0.0213513	d1.b..d1.a		ENSG00000235238.1	ENSG00000235238	SUMO2P1	-1.96695	0.0148591	d5.ab..d5.c				ENSG00000144724.14	ENSG00000144724	PTPRG	-2.56011	0.0111784	d7.ab..d7.c				ENSG00000147459.13	ENSG00000147459	DOCK5	3.725	0.0268875	d10.ab..d10.c
								ENSG00000144834.8	ENSG00000144834	TAGLN3	-2.48129	0.016405	d1.a..d1.c			ENSG00000111652.5	ENSG00000111652	COPS7A	2.01671	0.0215038	d1.b..d1.a		ENSG00000139910.15	ENSG00000139910	NOVA1	-1.21295	0.0150943	d5.ab..d5.c				ENSG00000064042.13	ENSG00000064042	LIMCH1	1.08312	0.0114292	d7.ab..d7.c				ENSG00000104722.9	ENSG00000104722	NEFM	-1.99553	0.0281209	d10.ab..d10.c
								ENSG00000083067.18	ENSG00000083067	TRPM3	5.09491	0.0165986	d1.a..d1.c			ENSG00000026652.9	ENSG00000026652	AGPAT4	1.75222	0.0215774	d1.b..d1.a		ENSG00000243069.3	ENSG00000243069	ARHGEF26-AS1	-2.16365	0.0152347	d5.ab..d5.c				ENSG00000123636.13	ENSG00000123636	BAZ2B	-0.853371	0.0115584	d7.ab..d7.c				ENSG00000134533.2	ENSG00000134533	RERG	-2.76049	0.027979	d10.ab..d10.c
								ENSG00000273237.1	ENSG00000273237		-3.60614	0.0166008	d1.a..d1.c			ENSG00000175166.12	ENSG00000175166	PSMD2	-0.727339	0.0224232	d1.b..d1.a		ENSG00000160145.11	ENSG00000160145	KALRN	-1.93417	0.0152901	d5.ab..d5.c				ENSG00000211451.7	ENSG00000211451	GNRHR2	-2.36318	0.0116694	d7.ab..d7.c				ENSG00000170043.7	ENSG00000170043	TRAPPC1	-2.36138	0.0272445	d10.ab..d10.c
								ENSG00000106829.14	ENSG00000106829	TLE4	1.48877	0.0166189	d1.a..d1.c			ENSG00000248265.1	ENSG00000248265		-1.95059	0.0226685	d1.b..d1.a		ENSG00000198160.10	ENSG00000198160	MIER1	0.917912	0.0156407	d5.ab..d5.c				ENSG00000110090.8	ENSG00000110090	CPT1A	-2.29754	0.0117981	d7.ab..d7.c				ENSG00000229932.2	ENSG00000229932	YWHAZP3	-2.09531	0.0281105	d10.ab..d10.c
								ENSG00000153046.13	ENSG00000153046	CDYL	-1.78653	0.0166447	d1.a..d1.c			ENSG00000168273.3	ENSG00000168273	SMIM4	-1.65304	0.0231518	d1.b..d1.a		ENSG00000259752.1	ENSG00000259752		-1.99974	0.0159517	d5.ab..d5.c				ENSG00000189403.10	ENSG00000189403	HMGB1	0.590795	0.0118062	d7.ab..d7.c				ENSG00000232406.2	ENSG00000232406		-2.76049	0.0279938	d10.ab..d10.c
								ENSG00000164414.12	ENSG00000164414	SLC35A1	4.1024	0.0168224	d1.a..d1.c			ENSG00000141367.7	ENSG00000141367	CLTC	-0.7604	0.0231905	d1.b..d1.a		ENSG00000184949.11	ENSG00000184949	FAM227A	1.90139	0.0159565	d5.ab..d5.c				ENSG00000253712.1	ENSG00000253712		-2.46165	0.0119252	d7.ab..d7.c				ENSG00000237238.2	ENSG00000237238	BMS1P10	-3.42567	0.0281094	d10.ab..d10.c
								ENSG00000111981.4	ENSG00000111981	ULBP1	-2.08428	0.0168843	d1.a..d1.c			ENSG00000165194.10	ENSG00000165194	PCDH19	1.48774	0.0235251	d1.b..d1.a		ENSG00000100320.18	ENSG00000100320	RBFOX2	-1.14739	0.016059	d5.ab..d5.c				ENSG00000163531.11	ENSG00000163531	NFASC	-4.00428	0.0121348	d7.ab..d7.c				ENSG00000237484.5	ENSG00000237484	LINC01684	-1.96228	0.0276784	d10.ab..d10.c
								ENSG00000088325.11	ENSG00000088325	TPX2	2.44821	0.0169014	d1.a..d1.c			ENSG00000136231.9	ENSG00000136231	IGF2BP3	0.958765	0.0235662	d1.b..d1.a		ENSG00000237484.5	ENSG00000237484	LINC01684	-1.80304	0.01644	d5.ab..d5.c				ENSG00000197183.8	ENSG00000197183	NOL4L	-1.21441	0.0121355	d7.ab..d7.c				ENSG00000264423.1	ENSG00000264423	RN7SL718P	-2.56094	0.0277613	d10.ab..d10.c
								ENSG00000242265.1	ENSG00000242265	PEG10	1.68728	0.017246	d1.a..d1.c			ENSG00000107796.8	ENSG00000107796	ACTA2	-1.75222	0.0237322	d1.b..d1.a		ENSG00000229932.2	ENSG00000229932	YWHAZP3	-1.80304	0.0164799	d5.ab..d5.c				ENSG00000104427.7	ENSG00000104427	ZC2HC1A	-1.47699	0.0121395	d7.ab..d7.c				ENSG00000104388.10	ENSG00000104388	RAB2A	-1.96228	0.0289019	d10.ab..d10.c
								ENSG00000108379.5	ENSG00000108379	WNT3	2.71288	0.0173531	d1.a..d1.c			ENSG00000105220.10	ENSG00000105220	GPI	0.462852	0.0238361	d1.b..d1.a		ENSG00000167765.3	ENSG00000167765		-2.39313	0.0166882	d5.ab..d5.c				ENSG00000185008.13	ENSG00000185008	ROBO2	-1.67392	0.0124002	d7.ab..d7.c				ENSG00000143774.12	ENSG00000143774	GUK1	-3.12634	0.0293285	d10.ab..d10.c
								ENSG00000172878.9	ENSG00000172878	METAP1D	5.128	0.0175435	d1.a..d1.c			ENSG00000100316.11	ENSG00000100316	RPL3	0.330608	0.024067	d1.b..d1.a		ENSG00000223579.2	ENSG00000223579		-2.49147	0.0167834	d5.ab..d5.c				ENSG00000135069.9	ENSG00000135069	PSAT1	0.853371	0.0124813	d7.ab..d7.c				ENSG00000117139.12	ENSG00000117139	KDM5B	-0.997767	0.0297291	d10.ab..d10.c
								ENSG00000269893.2	ENSG00000269893	SNHG8	-2.21662	0.0175959	d1.a..d1.c			ENSG00000109099.9	ENSG00000109099	PMP22	-1.98365	0.0243469	d1.b..d1.a		ENSG00000053108.12	ENSG00000053108	FSTL4	-2.65539	0.0168564	d5.ab..d5.c				ENSG00000110906.8	ENSG00000110906	KCTD10	-0.919015	0.0127809	d7.ab..d7.c				ENSG00000147036.7	ENSG00000147036	LANCL3	-2.02879	0.0297229	d10.ab..d10.c
								ENSG00000162813.13	ENSG00000162813	BPNT1	-2.44821	0.0176706	d1.a..d1.c			ENSG00000253734.1	ENSG00000253734	LINC01289	1.85141	0.024382	d1.b..d1.a		ENSG00000139618.10	ENSG00000139618	BRCA2	1.63913	0.0169255	d5.ab..d5.c				ENSG00000131149.13	ENSG00000131149	GSE1	-1.6411	0.0127838	d7.ab..d7.c				ENSG00000006625.13	ENSG00000006625	GGCT	1.39687	0.0324087	d10.ab..d10.c
								ENSG00000151914.13	ENSG00000151914	DST	-1.15793	0.0181186	d1.a..d1.c			ENSG00000110888.13	ENSG00000110888	CAPRIN2	-1.75222	0.0244106	d1.b..d1.a		ENSG00000143702.11	ENSG00000143702	CEP170	-1.18017	0.0170027	d5.ab..d5.c				ENSG00000173221.9	ENSG00000173221	GLRX	-2.88833	0.0128325	d7.ab..d7.c				ENSG00000008394.8	ENSG00000008394	MGST1	1.19732	0.0486725	d10.ab..d10.c
								ENSG00000181965.4	ENSG00000181965	NEUROG1	-5.26033	0.0181345	d1.a..d1.c			ENSG00000005022.5	ENSG00000005022	SLC25A5	0.495913	0.0244579	d1.b..d1.a		ENSG00000099624.3	ENSG00000099624	ATP5D	-2.13087	0.01717	d5.ab..d5.c				ENSG00000035928.10	ENSG00000035928	RFC1	1.21441	0.0128329	d7.ab..d7.c				ENSG00000039319.12	ENSG00000039319	ZFYVE16	1.36362	0.0342072	d10.ab..d10.c
								ENSG00000037965.4	ENSG00000037965	HOXC8	4.59866	0.0181856	d1.a..d1.c			ENSG00000141449.10	ENSG00000141449	GREB1L	-0.727339	0.0249812	d1.b..d1.a		ENSG00000154721.10	ENSG00000154721	JAM2	0.885129	0.0172643	d5.ab..d5.c				ENSG00000257608.1	ENSG00000257608		-2.23189	0.0128591	d7.ab..d7.c				ENSG00000051108.10	ENSG00000051108	HERPUD1	-2.49442	0.0417316	d10.ab..d10.c
								ENSG00000114279.9	ENSG00000114279	FGF12	6.91453	0.0183386	d1.a..d1.c			ENSG00000187051.4	ENSG00000187051	RPS19BP1	-1.95059	0.02519	d1.b..d1.a		ENSG00000100647.7	ENSG00000100647	SUSD6	-2.39313	0.0173363	d5.ab..d5.c				ENSG00000250472.1	ENSG00000250472	TRIM36-IT1	-1.73956	0.0129139	d7.ab..d7.c				ENSG00000064042.13	ENSG00000064042	LIMCH1	0.997767	0.0382501	d10.ab..d10.c
								ENSG00000155506.12	ENSG00000155506	LARP1	1.38952	0.018383	d1.a..d1.c			ENSG00000187446.7	ENSG00000187446	CHP1	0.429791	0.0252362	d1.b..d1.a		ENSG00000196177.8	ENSG00000196177	ACADSB	-2.16365	0.0175617	d5.ab..d5.c				ENSG00000013293.5	ENSG00000013293	SLC7A14	-3.87299	0.0130218	d7.ab..d7.c				ENSG00000067445.16	ENSG00000067445	TRO	-1.43013	0.0386205	d10.ab..d10.c
								ENSG00000096696.9	ENSG00000096696	DSP	2.31587	0.0186436	d1.a..d1.c			ENSG00000165659.12	ENSG00000165659		-1.25631	0.02561	d1.b..d1.a		ENSG00000248445.1	ENSG00000248445	SEMA6A-AS1	-2.85208	0.017898	d5.ab..d5.c				ENSG00000147257.9	ENSG00000147257	GPC3	1.0503	0.0131398	d7.ab..d7.c				ENSG00000072786.8	ENSG00000072786	STK10	-4.25714	0.0369166	d10.ab..d10.c
								ENSG00000140262.13	ENSG00000140262	TCF12	-1.12485	0.018687	d1.a..d1.c			ENSG00000236252.2	ENSG00000236252		-2.11589	0.0256492	d1.b..d1.a		ENSG00000230734.1	ENSG00000230734	RPL10P3	-2.75373	0.0179115	d5.ab..d5.c				ENSG00000174106.2	ENSG00000174106	LEMD3	2.56011	0.0132935	d7.ab..d7.c				ENSG00000077235.13	ENSG00000077235	GTF3C1	-2.82701	0.0408903	d10.ab..d10.c
								ENSG00000164938.9	ENSG00000164938	TP53INP1	-1.35644	0.0190011	d1.a..d1.c			ENSG00000143514.12	ENSG00000143514	TP53BP2	-1.48774	0.0257456	d1.b..d1.a		ENSG00000234964.3	ENSG00000234964	FABP5P7	-1.73748	0.018102	d5.ab..d5.c				ENSG00000106701.7	ENSG00000106701	FSD1L	-1.54263	0.0132999	d7.ab..d7.c				ENSG00000084093.11	ENSG00000084093	REST	1.33036	0.033897	d10.ab..d10.c
								ENSG00000266916.1	ENSG00000266916	ZNF793-AS1	-4.33398	0.0191801	d1.a..d1.c			ENSG00000143363.11	ENSG00000143363	PRUNE1	-1.58692	0.0259184	d1.b..d1.a		ENSG00000138604.5	ENSG00000138604	GLCE	-3.21269	0.0181399	d5.ab..d5.c				ENSG00000259692.1	ENSG00000259692		-2.03496	0.0133335	d7.ab..d7.c				ENSG00000092201.5	ENSG00000092201	SUPT16H	0.931249	0.0399277	d10.ab..d10.c
								ENSG00000106263.13	ENSG00000106263	EIF3B	6.41827	0.0192091	d1.a..d1.c			ENSG00000083067.18	ENSG00000083067	TRPM3	-1.85141	0.0260063	d1.b..d1.a		ENSG00000227077.2	ENSG00000227077		-1.93417	0.018636	d5.ab..d5.c				ENSG00000131037.10	ENSG00000131037	EPS8L1	-3.24937	0.0133415	d7.ab..d7.c				ENSG00000101290.9	ENSG00000101290	CDS2	-1.19732	0.0329197	d10.ab..d10.c
								ENSG00000235609.4	ENSG00000235609		-2.08428	0.0192908	d1.a..d1.c			ENSG00000177030.12	ENSG00000177030	DEAF1	-1.98365	0.0269708	d1.b..d1.a		ENSG00000170145.4	ENSG00000170145	SIK2	1.83582	0.0187983	d5.ab..d5.c				ENSG00000205542.6	ENSG00000205542	TMSB4X	-0.623617	0.0133463	d7.ab..d7.c				ENSG00000104112.4	ENSG00000104112	SCG3	-2.4279	0.0450097	d10.ab..d10.c
								ENSG00000183340.5	ENSG00000183340	JRKL	4.40015	0.0193087	d1.a..d1.c			ENSG00000184402.10	ENSG00000184402	SS18L1	1.85141	0.0269826	d1.b..d1.a		ENSG00000102302.7	ENSG00000102302	FGD1	2.8193	0.018897	d5.ab..d5.c				ENSG00000254561.2	ENSG00000254561		-3.05244	0.0137277	d7.ab..d7.c				ENSG00000104231.6	ENSG00000104231	ZFAND1	1.92902	0.0422344	d10.ab..d10.c
								ENSG00000146197.7	ENSG00000146197	SCUBE3	1.12485	0.0193717	d1.a..d1.c			ENSG00000072041.12	ENSG00000072041	SLC6A15	1.65304	0.0271388	d1.b..d1.a		ENSG00000143575.10	ENSG00000143575	HAX1	-1.27852	0.018899	d5.ab..d5.c				ENSG00000251634.2	ENSG00000251634		-2.72422	0.0137607	d7.ab..d7.c				ENSG00000105379.5	ENSG00000105379	ETFB	-1.89576	0.0478755	d10.ab..d10.c
								ENSG00000264364.2	ENSG00000264364	DYNLL2	-1.88578	0.0195493	d1.a..d1.c			ENSG00000177697.13	ENSG00000177697	CD151	-2.18202	0.0274097	d1.b..d1.a		ENSG00000139437.13	ENSG00000139437	TCHP	3.24547	0.0190066	d5.ab..d5.c				ENSG00000111897.6	ENSG00000111897	SERINC1	-1.08312	0.013783	d7.ab..d7.c				ENSG00000108511.8	ENSG00000108511	HOXB6	-1.96228	0.0321946	d10.ab..d10.c
								ENSG00000148019.8	ENSG00000148019	CEP78	1.55494	0.0197995	d1.a..d1.c			ENSG00000164134.8	ENSG00000164134	NAA15	-0.661217	0.0274146	d1.b..d1.a		ENSG00000169855.15	ENSG00000169855	ROBO1	-1.08182	0.019136	d5.ab..d5.c				ENSG00000112078.9	ENSG00000112078	KCTD20	2.396	0.0139437	d7.ab..d7.c				ENSG00000109083.9	ENSG00000109083	IFT20	-1.52991	0.045617	d10.ab..d10.c
								ENSG00000044574.7	ENSG00000044574	HSPA5	1.15793	0.0198641	d1.a..d1.c			ENSG00000129810.10	ENSG00000129810	SGO1	-1.45468	0.0274376	d1.b..d1.a		ENSG00000264352.1	ENSG00000264352	RN7SL602P	-1.86861	0.0191772	d5.ab..d5.c				ENSG00000203879.7	ENSG00000203879	GDI1	-2.19907	0.0140964	d7.ab..d7.c				ENSG00000110906.8	ENSG00000110906	KCTD10	-1.2971	0.037209	d10.ab..d10.c
								ENSG00000173706.8	ENSG00000173706	HEG1	-1.88578	0.020051	d1.a..d1.c			ENSG00000170144.14	ENSG00000170144	HNRNPA3	-0.628156	0.0274639	d1.b..d1.a		ENSG00000215769.4	ENSG00000215769	ARHGAP27P1-BPTFP1-KPNA2P3	-2.16365	0.0195336	d5.ab..d5.c				ENSG00000130224.10	ENSG00000130224	LRCH2	-2.13343	0.0141461	d7.ab..d7.c				ENSG00000111581.5	ENSG00000111581	NUP107	1.09754	0.0323228	d10.ab..d10.c
								ENSG00000147403.12	ENSG00000147403	RPL10	-0.86018	0.0202115	d1.a..d1.c			ENSG00000091527.11	ENSG00000091527	CDV3	-0.595095	0.0276391	d1.b..d1.a		ENSG00000101166.11	ENSG00000101166	PRELID3B	-1.01626	0.0195547	d5.ab..d5.c				ENSG00000164754.8	ENSG00000164754	RAD21	0.820549	0.01427	d7.ab..d7.c				ENSG00000113013.8	ENSG00000113013	HSPA9	1.43013	0.0336719	d10.ab..d10.c
								ENSG00000111669.10	ENSG00000111669	TPI1	0.893264	0.0202586	d1.a..d1.c			ENSG00000135540.7	ENSG00000135540	NHSL1	0.562034	0.0277847	d1.b..d1.a		ENSG00000137872.11	ENSG00000137872	SEMA6D	-2.13087	0.0199695	d5.ab..d5.c				ENSG00000219665.4	ENSG00000219665		-2.56011	0.0142711	d7.ab..d7.c				ENSG00000114115.5	ENSG00000114115	RBP1	-0.964508	0.0431729	d10.ab..d10.c
								ENSG00000135069.9	ENSG00000135069	PSAT1	1.42261	0.020306	d1.a..d1.c			ENSG00000088325.11	ENSG00000088325	TPX2	-1.02489	0.0280072	d1.b..d1.a		ENSG00000215375.2	ENSG00000215375	MYL5	-2.22921	0.0201977	d5.ab..d5.c				ENSG00000119969.10	ENSG00000119969	HELLS	0.919015	0.0143063	d7.ab..d7.c				ENSG00000115295.15	ENSG00000115295	CLIP4	-2.96004	0.0393643	d10.ab..d10.c
								ENSG00000092847.6	ENSG00000092847	AGO1	-1.25719	0.0203292	d1.a..d1.c			ENSG00000144567.6	ENSG00000144567	RETREG2	-1.05795	0.0283434	d1.b..d1.a		ENSG00000242267.2	ENSG00000242267	SKINT1L	-1.96695	0.0202166	d5.ab..d5.c				ENSG00000104889.4	ENSG00000104889	RNASEH2A	2.56011	0.0146339	d7.ab..d7.c				ENSG00000115756.8	ENSG00000115756	HPCAL1	-2.16183	0.032382	d10.ab..d10.c
								ENSG00000100644.12	ENSG00000100644	HIF1A	-1.19102	0.0204437	d1.a..d1.c			ENSG00000103091.10	ENSG00000103091	WDR59	1.42162	0.0294246	d1.b..d1.a		ENSG00000179101.5	ENSG00000179101		-1.83582	0.0202262	d5.ab..d5.c				ENSG00000170456.10	ENSG00000170456	DENND5B	-0.984659	0.0146549	d7.ab..d7.c				ENSG00000116001.11	ENSG00000116001	TIA1	-0.798214	0.0359363	d10.ab..d10.c
								ENSG00000134986.9	ENSG00000134986	NREP	-0.827096	0.0205453	d1.a..d1.c			ENSG00000183010.12	ENSG00000183010	PYCR1	-1.88447	0.0296151	d1.b..d1.a		ENSG00000138411.6	ENSG00000138411	HECW2	-2.52426	0.0202291	d5.ab..d5.c				ENSG00000105392.11	ENSG00000105392	CRX	-2.06778	0.0146911	d7.ab..d7.c				ENSG00000116406.14	ENSG00000116406	EDEM3	-2.22835	0.0354023	d10.ab..d10.c
								ENSG00000232274.2	ENSG00000232274		4.03623	0.0207997	d1.a..d1.c			ENSG00000162944.6	ENSG00000162944	RFTN2	-0.991825	0.0298318	d1.b..d1.a		ENSG00000128656.9	ENSG00000128656	CHN1	-1.73748	0.0211283	d5.ab..d5.c				ENSG00000165434.6	ENSG00000165434	PGM2L1	-1.3457	0.014695	d7.ab..d7.c				ENSG00000116852.10	ENSG00000116852	KIF21B	-3.05982	0.0436496	d10.ab..d10.c
								ENSG00000134444.9	ENSG00000134444	KIAA1468	3.83773	0.0208113	d1.a..d1.c			ENSG00000150907.6	ENSG00000150907	FOXO1	-1.45468	0.0299234	d1.b..d1.a		ENSG00000186329.5	ENSG00000186329	TMEM212	-1.83582	0.021177	d5.ab..d5.c				ENSG00000055917.11	ENSG00000055917	PUM2	-0.951837	0.0147253	d7.ab..d7.c				ENSG00000118473.17	ENSG00000118473	SGIP1	-2.59419	0.0378153	d10.ab..d10.c
								ENSG00000185722.12	ENSG00000185722	ANKFY1	1.91886	0.0211198	d1.a..d1.c			ENSG00000183722.7	ENSG00000183722	LHFPL6	0.958765	0.0301329	d1.b..d1.a		ENSG00000132780.12	ENSG00000132780	NASP	0.753999	0.0211771	d5.ab..d5.c				ENSG00000264423.1	ENSG00000264423	RN7SL718P	-2.36318	0.0147736	d7.ab..d7.c				ENSG00000118705.12	ENSG00000118705	RPN2	1.03103	0.0444971	d10.ab..d10.c
								ENSG00000139679.11	ENSG00000139679	LPAR6	-3.4738	0.021182	d1.a..d1.c			ENSG00000163191.5	ENSG00000163191	S100A11	-1.55386	0.0308333	d1.b..d1.a		ENSG00000079102.12	ENSG00000079102	RUNX1T1	-1.27852	0.0212083	d5.ab..d5.c				ENSG00000067369.9	ENSG00000067369	TP53BP1	-1.18159	0.0147925	d7.ab..d7.c				ENSG00000119397.12	ENSG00000119397	CNTRL	1.1308	0.0443776	d10.ab..d10.c
								ENSG00000010810.13	ENSG00000010810	FYN	-1.55494	0.0212717	d1.a..d1.c			ENSG00000177565.11	ENSG00000177565	TBL1XR1	0.462852	0.0312537	d1.b..d1.a		ENSG00000130558.14	ENSG00000130558	OLFM1	-2.88486	0.0214073	d5.ab..d5.c				ENSG00000154608.9	ENSG00000154608	CEP170P1	-1.67392	0.0148507	d7.ab..d7.c				ENSG00000119509.8	ENSG00000119509	INVS	-2.59419	0.0419615	d10.ab..d10.c
								ENSG00000005007.8	ENSG00000005007	UPF1	3.93698	0.0215076	d1.a..d1.c			ENSG00000197056.5	ENSG00000197056	ZMYM1	-1.22325	0.0316703	d1.b..d1.a		ENSG00000091527.11	ENSG00000091527	CDV3	-0.721216	0.0216654	d5.ab..d5.c				ENSG00000111247.10	ENSG00000111247	RAD51AP1	1.87085	0.0149481	d7.ab..d7.c				ENSG00000119655.4	ENSG00000119655	NPC2	1.52991	0.0415587	d10.ab..d10.c
								ENSG00000100503.19	ENSG00000100503	NIN	-1.52186	0.0215667	d1.a..d1.c			ENSG00000052126.10	ENSG00000052126	PLEKHA5	0.892643	0.0321015	d1.b..d1.a		ENSG00000254185.1	ENSG00000254185		-3.14713	0.0217185	d5.ab..d5.c				ENSG00000170312.11	ENSG00000170312	CDK1	1.44417	0.0152352	d7.ab..d7.c				ENSG00000119705.5	ENSG00000119705	SLIRP	-2.09531	0.0434699	d10.ab..d10.c
								ENSG00000101391.16	ENSG00000101391	CDK5RAP1	3.70539	0.0217149	d1.a..d1.c			ENSG00000197757.7	ENSG00000197757	HOXC6	-2.04977	0.0323745	d1.b..d1.a		ENSG00000213189.4	ENSG00000213189	BTF3L4P2	-2.13087	0.021747	d5.ab..d5.c				ENSG00000203650.3	ENSG00000203650	LINC01285	-3.05244	0.0153348	d7.ab..d7.c				ENSG00000119801.8	ENSG00000119801	YPEL5	-1.09754	0.039466	d10.ab..d10.c
								ENSG00000261098.1	ENSG00000261098		4.76407	0.0217187	d1.a..d1.c			ENSG00000122042.9	ENSG00000122042	UBL3	1.6861	0.0324419	d1.b..d1.a		ENSG00000092421.12	ENSG00000092421	SEMA6A	-1.67191	0.0217614	d5.ab..d5.c				ENSG00000076356.6	ENSG00000076356	PLXNA2	-1.41134	0.0154063	d7.ab..d7.c				ENSG00000122406.8	ENSG00000122406	RPL5	0.59866	0.0361231	d10.ab..d10.c
								ENSG00000116991.6	ENSG00000116991	SIPA1L2	-1.68728	0.0219264	d1.a..d1.c			ENSG00000153094.17	ENSG00000153094	BCL2L11	1.55386	0.0325433	d1.b..d1.a		ENSG00000228308.1	ENSG00000228308	LINC01209	-3.34382	0.0218024	d5.ab..d5.c				ENSG00000123416.11	ENSG00000123416	TUBA1B	0.590795	0.0154308	d7.ab..d7.c				ENSG00000122566.16	ENSG00000122566	HNRNPA2B1	0.59866	0.0461154	d10.ab..d10.c
								ENSG00000165730.10	ENSG00000165730	STOX1	5.45884	0.0220572	d1.a..d1.c			ENSG00000143751.9	ENSG00000143751	SDE2	2.01671	0.0326382	d1.b..d1.a		ENSG00000142669.9	ENSG00000142669	SH3BGRL3	-0.753999	0.0220781	d5.ab..d5.c				ENSG00000166197.12	ENSG00000166197	NOLC1	1.01748	0.015445	d7.ab..d7.c				ENSG00000124207.12	ENSG00000124207	CSE1L	1.19732	0.0452611	d10.ab..d10.c
								ENSG00000132570.10	ENSG00000132570	PCBD2	2.48129	0.0220626	d1.a..d1.c			ENSG00000221829.5	ENSG00000221829	FANCG	1.91753	0.0326496	d1.b..d1.a		ENSG00000177511.5	ENSG00000177511	ST8SIA3	-2.8193	0.0222608	d5.ab..d5.c				ENSG00000143493.8	ENSG00000143493	INTS7	2.00214	0.0156351	d7.ab..d7.c				ENSG00000128059.4	ENSG00000128059	PPAT	1.72946	0.0316052	d10.ab..d10.c
								ENSG00000142669.9	ENSG00000142669	SH3BGRL3	-1.09177	0.0221359	d1.a..d1.c			ENSG00000196670.9	ENSG00000196670	ZFP62	-1.58692	0.0327222	d1.b..d1.a		ENSG00000114988.7	ENSG00000114988	LMAN2L	2.19643	0.0222923	d5.ab..d5.c				ENSG00000157827.15	ENSG00000157827	FMNL2	-1.54263	0.0156363	d7.ab..d7.c				ENSG00000129003.11	ENSG00000129003	VPS13C	-1.1308	0.0456708	d10.ab..d10.c
								ENSG00000124813.16	ENSG00000124813	RUNX2	4.63174	0.0221375	d1.a..d1.c			ENSG00000164924.13	ENSG00000164924	YWHAZ	-0.363669	0.0327487	d1.b..d1.a		ENSG00000033627.10	ENSG00000033627	ATP6V0A1	-1.67191	0.0222941	d5.ab..d5.c				ENSG00000206567.5	ENSG00000206567		-2.03496	0.0156386	d7.ab..d7.c				ENSG00000131368.3	ENSG00000131368	MRPS25	-1.39687	0.0307954	d10.ab..d10.c
								ENSG00000196782.8	ENSG00000196782	MAML3	-1.72036	0.0221959	d1.a..d1.c			ENSG00000198756.6	ENSG00000198756	COLGALT2	1.85141	0.0328129	d1.b..d1.a		ENSG00000143933.12	ENSG00000143933	CALM2	-0.491738	0.0224476	d5.ab..d5.c				ENSG00000264352.1	ENSG00000264352	RN7SL602P	-2.00214	0.0156407	d7.ab..d7.c				ENSG00000132432.9	ENSG00000132432	SEC61G	-2.59419	0.048734	d10.ab..d10.c
								ENSG00000175899.10	ENSG00000175899	A2M	3.90389	0.0223038	d1.a..d1.c			ENSG00000141101.8	ENSG00000141101	NOB1	1.15713	0.0335083	d1.b..d1.a		ENSG00000106648.9	ENSG00000106648	GALNTL5	-2.36034	0.0227668	d5.ab..d5.c				ENSG00000130803.10	ENSG00000130803	ZNF317	2.26471	0.0157184	d7.ab..d7.c				ENSG00000132604.6	ENSG00000132604	TERF2	-1.62969	0.0439239	d10.ab..d10.c
								ENSG00000111145.3	ENSG00000111145	ELK3	-3.44072	0.0223405	d1.a..d1.c			ENSG00000103507.9	ENSG00000103507	BCKDK	-1.58692	0.0339639	d1.b..d1.a		ENSG00000169504.10	ENSG00000169504	CLIC4	1.3113	0.0229401	d5.ab..d5.c				ENSG00000072786.8	ENSG00000072786	STK10	-3.21655	0.0159003	d7.ab..d7.c				ENSG00000132872.7	ENSG00000132872	SYT4	-2.46116	0.0302909	d10.ab..d10.c
								ENSG00000089289.11	ENSG00000089289	IGBP1	-1.65419	0.0223841	d1.a..d1.c			ENSG00000150764.9	ENSG00000150764	DIXDC1	0.991825	0.0343643	d1.b..d1.a		ENSG00000142864.10	ENSG00000142864	SERBP1	0.721216	0.0229483	d5.ab..d5.c				ENSG00000164032.7	ENSG00000164032	H2AFZ	0.656439	0.0159105	d7.ab..d7.c				ENSG00000134982.12	ENSG00000134982	APC	-1.26384	0.0487807	d10.ab..d10.c
								ENSG00000147509.9	ENSG00000147509	RGS20	-2.2497	0.0225309	d1.a..d1.c			ENSG00000148362.6	ENSG00000148362	PAXX	-2.11589	0.0343685	d1.b..d1.a		ENSG00000229097.1	ENSG00000229097	CALM2P2	-1.80304	0.0229653	d5.ab..d5.c				ENSG00000156374.10	ENSG00000156374	PCGF6	4.98894	0.0161398	d7.ab..d7.c				ENSG00000135637.9	ENSG00000135637	CCDC142	-2.79375	0.0443263	d10.ab..d10.c
								ENSG00000165349.7	ENSG00000165349	SLC7A3	4.99566	0.0227115	d1.a..d1.c			ENSG00000142082.10	ENSG00000142082	SIRT3	1.75222	0.034424	d1.b..d1.a		ENSG00000169609.9	ENSG00000169609	C15orf40	-1.93417	0.023135	d5.ab..d5.c				ENSG00000105426.10	ENSG00000105426	PTPRS	-0.722083	0.0161555	d7.ab..d7.c				ENSG00000136603.9	ENSG00000136603	SKIL	-0.798214	0.0353225	d10.ab..d10.c
								ENSG00000128923.6	ENSG00000128923	MINDY2	3.87081	0.0228179	d1.a..d1.c			ENSG00000125257.9	ENSG00000125257	ABCC4	1.45468	0.0344804	d1.b..d1.a		ENSG00000110042.3	ENSG00000110042	DTX4	0.917912	0.023384	d5.ab..d5.c				ENSG00000241468.3	ENSG00000241468	ATP5J2	-1.73956	0.0162921	d7.ab..d7.c				ENSG00000137074.14	ENSG00000137074	APTX	-1.59643	0.0467742	d10.ab..d10.c
								ENSG00000260128.2	ENSG00000260128	ULK4P2	-5.02875	0.0229482	d1.a..d1.c			ENSG00000204160.7	ENSG00000204160	ZDHHC18	-2.11589	0.0347617	d1.b..d1.a		ENSG00000239246.2	ENSG00000239246		-1.86861	0.0234876	d5.ab..d5.c				ENSG00000134313.10	ENSG00000134313	KIDINS220	-1.18159	0.0163088	d7.ab..d7.c				ENSG00000137106.13	ENSG00000137106	GRHPR	1.89576	0.0400186	d10.ab..d10.c
								ENSG00000198901.9	ENSG00000198901	PRC1	1.95195	0.0230825	d1.a..d1.c			ENSG00000100335.8	ENSG00000100335	MIEF1	1.09101	0.0351888	d1.b..d1.a		ENSG00000166848.5	ENSG00000166848	TERF2IP	-1.77026	0.0235334	d5.ab..d5.c				ENSG00000080986.8	ENSG00000080986	NDC80	2.33036	0.0165387	d7.ab..d7.c				ENSG00000137267.5	ENSG00000137267	TUBB2A	-1.62969	0.0371451	d10.ab..d10.c
								ENSG00000114646.5	ENSG00000114646	CSPG5	-4.76407	0.0233557	d1.a..d1.c			ENSG00000101115.8	ENSG00000101115	SALL4	-1.22325	0.0357722	d1.b..d1.a		ENSG00000224008.1	ENSG00000224008	LINC01441	-2.45869	0.0235479	d5.ab..d5.c				ENSG00000137804.8	ENSG00000137804	NUSAP1	1.01748	0.0167055	d7.ab..d7.c				ENSG00000137343.13	ENSG00000137343	ATAT1	-2.06205	0.0373136	d10.ab..d10.c
								ENSG00000187951.6	ENSG00000187951	ARHGAP11B	5.45884	0.0233822	d1.a..d1.c			ENSG00000033867.12	ENSG00000033867	SLC4A7	1.09101	0.0366033	d1.b..d1.a		ENSG00000153832.7	ENSG00000153832	FBXO36	2.16365	0.023578	d5.ab..d5.c				ENSG00000092820.13	ENSG00000092820	EZR	1.57545	0.0167506	d7.ab..d7.c				ENSG00000143257.7	ENSG00000143257	NR1I3	-2.09531	0.0450855	d10.ab..d10.c
								ENSG00000109689.10	ENSG00000109689	STIM2	4.92949	0.0233882	d1.a..d1.c			ENSG00000145819.11	ENSG00000145819	ARHGAP26	2.2812	0.0374747	d1.b..d1.a		ENSG00000198477.3	ENSG00000198477		-1.18017	0.0235994	d5.ab..d5.c				ENSG00000141664.5	ENSG00000141664	ZCCHC2	1.96932	0.0168201	d7.ab..d7.c				ENSG00000144504.11	ENSG00000144504	ANKMY1	-3.69174	0.0477806	d10.ab..d10.c
								ENSG00000100321.10	ENSG00000100321	SYNGR1	5.55809	0.0241283	d1.a..d1.c			ENSG00000099308.6	ENSG00000099308	MAST3	1.22325	0.0374993	d1.b..d1.a		ENSG00000140836.10	ENSG00000140836	ZFHX3	0.885129	0.0236447	d5.ab..d5.c				ENSG00000111859.12	ENSG00000111859	NEDD9	1.41134	0.0169065	d7.ab..d7.c				ENSG00000144792.5	ENSG00000144792	ZNF660	-1.66295	0.0466498	d10.ab..d10.c
								ENSG00000091972.14	ENSG00000091972	CD200	-1.98503	0.0246582	d1.a..d1.c			ENSG00000066933.11	ENSG00000066933	MYO9A	1.22325	0.0377502	d1.b..d1.a		ENSG00000162065.7	ENSG00000162065	TBC1D24	-1.04904	0.0237493	d5.ab..d5.c				ENSG00000132639.8	ENSG00000132639	SNAP25	-2.36318	0.0169783	d7.ab..d7.c				ENSG00000145423.4	ENSG00000145423	SFRP2	1.89576	0.04415	d10.ab..d10.c
								ENSG00000143772.5	ENSG00000143772	ITPKB	4.4994	0.024855	d1.a..d1.c			ENSG00000253284.2	ENSG00000253284		1.88447	0.0379133	d1.b..d1.a		ENSG00000189229.10	ENSG00000189229		-2.8193	0.0238678	d5.ab..d5.c				ENSG00000179101.5	ENSG00000179101		-2.03496	0.0170398	d7.ab..d7.c				ENSG00000147604.9	ENSG00000147604	RPL7	0.565401	0.0455231	d10.ab..d10.c
								ENSG00000136267.9	ENSG00000136267	DGKB	-3.17605	0.0249108	d1.a..d1.c			ENSG00000091732.11	ENSG00000091732	ZC3HC1	-1.02489	0.0379889	d1.b..d1.a		ENSG00000134313.10	ENSG00000134313	KIDINS220	-1.04904	0.023994	d5.ab..d5.c				ENSG00000094916.9	ENSG00000094916	CBX5	0.590795	0.0170936	d7.ab..d7.c				ENSG00000147654.10	ENSG00000147654	EBAG9	-2.4279	0.0392374	d10.ab..d10.c
								ENSG00000169189.12	ENSG00000169189	NSMCE1	-1.95195	0.0250784	d1.a..d1.c			ENSG00000096063.10	ENSG00000096063	SRPK1	0.7604	0.038129	d1.b..d1.a		ENSG00000249532.2	ENSG00000249532		-1.73748	0.0240562	d5.ab..d5.c				ENSG00000094975.9	ENSG00000094975	SUCO	-1.67392	0.0173601	d7.ab..d7.c				ENSG00000150459.8	ENSG00000150459	SAP18	1.03103	0.030928	d10.ab..d10.c
								ENSG00000247708.3	ENSG00000247708	STX18-AS1	4.03623	0.0252842	d1.a..d1.c			ENSG00000157827.15	ENSG00000157827	FMNL2	0.958765	0.0382182	d1.b..d1.a		ENSG00000267439.1	ENSG00000267439		-2.75373	0.0241261	d5.ab..d5.c				ENSG00000183765.16	ENSG00000183765	CHEK2	2.13343	0.017384	d7.ab..d7.c				ENSG00000153253.11	ENSG00000153253	SCN3A	-2.32812	0.0390067	d10.ab..d10.c
								ENSG00000250472.1	ENSG00000250472	TRIM36-IT1	-2.54746	0.0254609	d1.a..d1.c			ENSG00000112394.12	ENSG00000112394	SLC16A10	1.65304	0.038445	d1.b..d1.a		ENSG00000006530.11	ENSG00000006530	AGK	1.21295	0.0242017	d5.ab..d5.c				ENSG00000164751.10	ENSG00000164751	PEX2	1.31288	0.0175473	d7.ab..d7.c				ENSG00000154639.14	ENSG00000154639	CXADR	-0.864732	0.0399376	d10.ab..d10.c
								ENSG00000185008.13	ENSG00000185008	ROBO2	-2.15045	0.0255237	d1.a..d1.c			ENSG00000166153.12	ENSG00000166153	DEPDC4	-2.01671	0.0388734	d1.b..d1.a		ENSG00000188070.8	ENSG00000188070	C11orf95	-1.80304	0.0242138	d5.ab..d5.c				ENSG00000110042.3	ENSG00000110042	DTX4	0.853371	0.01766	d7.ab..d7.c				ENSG00000156011.12	ENSG00000156011	PSD3	-1.72946	0.0420527	d10.ab..d10.c
								ENSG00000253554.1	ENSG00000253554		-1.78653	0.0256225	d1.a..d1.c			ENSG00000147509.9	ENSG00000147509	RGS20	1.55386	0.0391683	d1.b..d1.a		ENSG00000141449.10	ENSG00000141449	GREB1L	-1.08182	0.0242825	d5.ab..d5.c				ENSG00000142230.7	ENSG00000142230	SAE1	0.951837	0.017685	d7.ab..d7.c				ENSG00000157827.15	ENSG00000157827	FMNL2	-1.49665	0.0395647	d10.ab..d10.c
								ENSG00000127507.13	ENSG00000127507	ADGRE2	-5.19416	0.0256294	d1.a..d1.c			ENSG00000186298.7	ENSG00000186298	PPP1CC	0.859582	0.0398608	d1.b..d1.a		ENSG00000151746.9	ENSG00000151746	BICD1	-1.77026	0.0245421	d5.ab..d5.c				ENSG00000122966.9	ENSG00000122966	CIT	1.83803	0.0181393	d7.ab..d7.c				ENSG00000159131.12	ENSG00000159131	GART	1.43013	0.0492735	d10.ab..d10.c
								ENSG00000117758.9	ENSG00000117758	STX12	-1.98503	0.0256983	d1.a..d1.c			ENSG00000152457.13	ENSG00000152457	DCLRE1C	-0.495913	0.03988	d1.b..d1.a		ENSG00000269866.1	ENSG00000269866		-2.78652	0.0245854	d5.ab..d5.c				ENSG00000108389.5	ENSG00000108389	MTMR4	-1.6411	0.0183069	d7.ab..d7.c				ENSG00000162065.7	ENSG00000162065	TBC1D24	-1.52991	0.033813	d10.ab..d10.c
								ENSG00000104112.4	ENSG00000104112	SCG3	-3.24222	0.0257548	d1.a..d1.c			ENSG00000169621.5	ENSG00000169621	APLF	-1.78529	0.0401315	d1.b..d1.a		ENSG00000111321.6	ENSG00000111321	LTBR	-2.22921	0.0247213	d5.ab..d5.c				ENSG00000143476.13	ENSG00000143476	DTL	2.19907	0.0183898	d7.ab..d7.c				ENSG00000162188.5	ENSG00000162188	GNG3	-2.89353	0.0342818	d10.ab..d10.c
								ENSG00000063127.11	ENSG00000063127	SLC6A16	-2.2497	0.0257715	d1.a..d1.c			ENSG00000008735.10	ENSG00000008735	MAPK8IP2	-2.14896	0.040362	d1.b..d1.a		ENSG00000122644.8	ENSG00000122644	ARL4A	0.885129	0.024785	d5.ab..d5.c				ENSG00000124380.6	ENSG00000124380	SNRNP27	-1.6411	0.0184961	d7.ab..d7.c				ENSG00000162959.9	ENSG00000162959	MEMO1	-1.6962	0.0422677	d10.ab..d10.c
								ENSG00000100281.9	ENSG00000100281	HMGXB4	1.45569	0.0259534	d1.a..d1.c			ENSG00000166439.5	ENSG00000166439	RNF169	-1.95059	0.0404378	d1.b..d1.a		ENSG00000232233.1	ENSG00000232233	LINC02043	-1.67191	0.0248278	d5.ab..d5.c				ENSG00000108828.11	ENSG00000108828	VAT1	-1.08312	0.0186003	d7.ab..d7.c				ENSG00000164080.9	ENSG00000164080	RAD54L2	-1.46339	0.032524	d10.ab..d10.c
								ENSG00000113657.8	ENSG00000113657	DPYSL3	-1.29027	0.0260195	d1.a..d1.c			ENSG00000162994.11	ENSG00000162994	CLHC1	-1.78529	0.0408361	d1.b..d1.a		ENSG00000249736.1	ENSG00000249736	LINC02242	-1.67191	0.0249573	d5.ab..d5.c				ENSG00000156298.8	ENSG00000156298	TSPAN7	-2.82269	0.0187206	d7.ab..d7.c				ENSG00000166963.8	ENSG00000166963	MAP1A	-1.8625	0.0346229	d10.ab..d10.c
								ENSG00000162545.5	ENSG00000162545	CAMK2N1	-1.78653	0.0262107	d1.a..d1.c			ENSG00000175352.6	ENSG00000175352	NRIP3	1.48774	0.0411324	d1.b..d1.a		ENSG00000197548.8	ENSG00000197548	ATG7	2.65539	0.0250859	d5.ab..d5.c				ENSG00000119705.5	ENSG00000119705	SLIRP	-1.73956	0.0187209	d7.ab..d7.c				ENSG00000167470.8	ENSG00000167470	MIDN	-1.89576	0.0468874	d10.ab..d10.c
								ENSG00000134247.9	ENSG00000134247	PTGFRN	1.12485	0.0264486	d1.a..d1.c			ENSG00000171843.11	ENSG00000171843	MLLT3	-0.694278	0.0422099	d1.b..d1.a		ENSG00000180488.10	ENSG00000180488	MIGA1	-1.67191	0.0251414	d5.ab..d5.c				ENSG00000230383.1	ENSG00000230383		-2.13343	0.0188196	d7.ab..d7.c				ENSG00000167613.11	ENSG00000167613	LAIR1	-2.36138	0.0407561	d10.ab..d10.c
								ENSG00000184661.9	ENSG00000184661	CDCA2	5.95509	0.0264605	d1.a..d1.c			ENSG00000072571.15	ENSG00000072571	HMMR	-1.48774	0.0422156	d1.b..d1.a		ENSG00000225137.1	ENSG00000225137	DYNC1I2P1	-2.262	0.0252466	d5.ab..d5.c				ENSG00000179766.13	ENSG00000179766	ATP8B5P	-2.6914	0.0188347	d7.ab..d7.c				ENSG00000167680.11	ENSG00000167680	SEMA6B	-2.12857	0.0338617	d10.ab..d10.c
								ENSG00000130309.6	ENSG00000130309	COLGALT1	1.2241	0.0266743	d1.a..d1.c			ENSG00000135919.8	ENSG00000135919	SERPINE2	-1.95059	0.0422227	d1.b..d1.a		ENSG00000258199.1	ENSG00000258199		-2.8193	0.0253488	d5.ab..d5.c				ENSG00000264194.1	ENSG00000264194		-2.56011	0.0188501	d7.ab..d7.c				ENSG00000168872.11	ENSG00000168872	DDX19A	1.92902	0.0323299	d10.ab..d10.c
								ENSG00000136270.9	ENSG00000136270	TBRG4	2.67979	0.0269455	d1.a..d1.c			ENSG00000134057.10	ENSG00000134057	CCNB1	-0.859582	0.0423417	d1.b..d1.a		ENSG00000154639.14	ENSG00000154639	CXADR	-0.885129	0.0254023	d5.ab..d5.c				ENSG00000125354.18	ENSG00000125354	SEPT6	-1.18159	0.0189215	d7.ab..d7.c				ENSG00000169359.9	ENSG00000169359	SLC33A1	-1.92902	0.0332845	d10.ab..d10.c
								ENSG00000118620.8	ENSG00000118620	ZNF430	1.91886	0.0273811	d1.a..d1.c			ENSG00000204899.5	ENSG00000204899	MZT1	-1.45468	0.0427954	d1.b..d1.a		ENSG00000116679.11	ENSG00000116679	IVNS1ABP	-1.11461	0.0254291	d5.ab..d5.c				ENSG00000113742.8	ENSG00000113742	CPEB4	-2.06778	0.018996	d7.ab..d7.c				ENSG00000169714.12	ENSG00000169714	CNBP	0.698437	0.045356	d10.ab..d10.c
								ENSG00000234456.3	ENSG00000234456	MAGI2-AS3	3.73848	0.0273995	d1.a..d1.c			ENSG00000168672.3	ENSG00000168672	FAM84B	-1.95059	0.0429158	d1.b..d1.a		ENSG00000124766.4	ENSG00000124766	SOX4	-0.688434	0.025436	d5.ab..d5.c				ENSG00000104848.1	ENSG00000104848	KCNA7	-2.6914	0.0191097	d7.ab..d7.c				ENSG00000170004.12	ENSG00000170004	CHD3	-2.82701	0.0367451	d10.ab..d10.c
								ENSG00000106780.7	ENSG00000106780	MEGF9	-2.64671	0.0274558	d1.a..d1.c			ENSG00000111144.5	ENSG00000111144	LTA4H	0.925704	0.0434115	d1.b..d1.a		ENSG00000144485.6	ENSG00000144485	HES6	-3.016	0.0254965	d5.ab..d5.c				ENSG00000249736.1	ENSG00000249736	LINC02242	-1.77239	0.0193578	d7.ab..d7.c				ENSG00000175324.5	ENSG00000175324	LSM1	-2.26161	0.042419	d10.ab..d10.c
								ENSG00000139800.8	ENSG00000139800	ZIC5	2.71288	0.0276736	d1.a..d1.c			ENSG00000145191.7	ENSG00000145191	EIF2B5	1.55386	0.0439286	d1.b..d1.a		ENSG00000128602.5	ENSG00000128602	SMO	2.19643	0.0255962	d5.ab..d5.c				ENSG00000167613.11	ENSG00000167613	LAIR1	-1.87085	0.0194447	d7.ab..d7.c				ENSG00000176087.10	ENSG00000176087	SLC35A4	1.89576	0.0408955	d10.ab..d10.c
								ENSG00000100987.10	ENSG00000100987	VSX1	-5.88893	0.0276838	d1.a..d1.c			ENSG00000123505.10	ENSG00000123505	AMD1	-0.7604	0.0441228	d1.b..d1.a		ENSG00000213430.5	ENSG00000213430	HSPD1P1	-1.70469	0.026094	d5.ab..d5.c				ENSG00000176485.6	ENSG00000176485	PLA2G16	-2.62576	0.0195915	d7.ab..d7.c				ENSG00000180998.7	ENSG00000180998	GPR137C	-2.09531	0.0344638	d10.ab..d10.c
								ENSG00000119547.5	ENSG00000119547	ONECUT2	-2.11737	0.0276943	d1.a..d1.c			ENSG00000116017.6	ENSG00000116017	ARID3A	-1.5208	0.0442884	d1.b..d1.a		ENSG00000104112.4	ENSG00000104112	SCG3	-2.29478	0.0261614	d5.ab..d5.c				ENSG00000162551.9	ENSG00000162551	ALPL	2.19907	0.0196685	d7.ab..d7.c				ENSG00000181163.9	ENSG00000181163	NPM1	0.59866	0.0441139	d10.ab..d10.c
								ENSG00000144476.5	ENSG00000144476	ACKR3	-1.98503	0.027966	d1.a..d1.c			ENSG00000160410.10	ENSG00000160410	SHKBP1	1.75222	0.0443914	d1.b..d1.a		ENSG00000179051.9	ENSG00000179051	RCC2	-0.917912	0.0262676	d5.ab..d5.c				ENSG00000166848.5	ENSG00000166848	TERF2IP	-1.80521	0.0197038	d7.ab..d7.c				ENSG00000182263.9	ENSG00000182263	FIGN	-1.16406	0.0488349	d10.ab..d10.c
								ENSG00000181019.8	ENSG00000181019	NQO1	5.75659	0.0281234	d1.a..d1.c			ENSG00000155438.7	ENSG00000155438	NIFK	1.05795	0.0445393	d1.b..d1.a		ENSG00000198478.6	ENSG00000198478	SH3BGRL2	-1.80304	0.0263492	d5.ab..d5.c				ENSG00000151276.19	ENSG00000151276	MAGI1	-1.37852	0.0197481	d7.ab..d7.c				ENSG00000182912.6	ENSG00000182912	TSPEAR-AS2	-2.86027	0.0480265	d10.ab..d10.c
								ENSG00000162873.10	ENSG00000162873	KLHDC8A	-5.19416	0.0281861	d1.a..d1.c			ENSG00000038274.12	ENSG00000038274	MAT2B	0.694278	0.0445468	d1.b..d1.a		ENSG00000143842.10	ENSG00000143842	SOX13	3.24547	0.0264377	d5.ab..d5.c				ENSG00000249437.3	ENSG00000249437	NAIP	-1.14877	0.0201119	d7.ab..d7.c				ENSG00000184194.5	ENSG00000184194	GPR173	-3.12634	0.0310606	d10.ab..d10.c
								ENSG00000267402.1	ENSG00000267402	TCF4-AS2	-3.57306	0.0282538	d1.a..d1.c			ENSG00000125772.8	ENSG00000125772	GPCPD1	-1.19019	0.0450124	d1.b..d1.a		ENSG00000186469.4	ENSG00000186469	GNG2	-1.01626	0.0265333	d5.ab..d5.c				ENSG00000151150.16	ENSG00000151150	ANK3	-1.60828	0.0202226	d7.ab..d7.c				ENSG00000188130.9	ENSG00000188130	MAPK12	-1.79598	0.0368076	d10.ab..d10.c
								ENSG00000139352.3	ENSG00000139352	ASCL1	-3.67231	0.0283078	d1.a..d1.c			ENSG00000136014.7	ENSG00000136014	USP44	1.22325	0.0450459	d1.b..d1.a		ENSG00000068745.10	ENSG00000068745	IP6K2	-0.721216	0.0268877	d5.ab..d5.c				ENSG00000188738.9	ENSG00000188738	FSIP2	-0.820549	0.0203055	d7.ab..d7.c				ENSG00000196656.6	ENSG00000196656		-2.32812	0.0331056	d10.ab..d10.c
								ENSG00000182568.12	ENSG00000182568	SATB1	-1.91886	0.0283674	d1.a..d1.c			ENSG00000120948.11	ENSG00000120948	TARDBP	-0.661217	0.045149	d1.b..d1.a		ENSG00000084444.9	ENSG00000084444	FAM234B	-0.983477	0.027141	d5.ab..d5.c				ENSG00000213885.3	ENSG00000213885	RPL13AP7	-1.83803	0.0203425	d7.ab..d7.c				ENSG00000197462.3	ENSG00000197462		-3.12634	0.0415272	d10.ab..d10.c
								ENSG00000196628.9	ENSG00000196628	TCF4	-1.12485	0.0283885	d1.a..d1.c			ENSG00000101935.5	ENSG00000101935	AMMECR1	-1.91753	0.0460309	d1.b..d1.a		ENSG00000117461.10	ENSG00000117461	PIK3R3	-1.04904	0.0272361	d5.ab..d5.c				ENSG00000183742.8	ENSG00000183742	MACC1	-2.13343	0.0203792	d7.ab..d7.c				ENSG00000198237.7	ENSG00000198237		-2.36138	0.0465977	d10.ab..d10.c
								ENSG00000152952.7	ENSG00000152952	PLOD2	3.77156	0.0285561	d1.a..d1.c			ENSG00000134222.12	ENSG00000134222	PSRC1	-1.61998	0.0467005	d1.b..d1.a		ENSG00000242522.1	ENSG00000242522	KLHL6-AS1	-3.08156	0.0273057	d5.ab..d5.c				ENSG00000147036.7	ENSG00000147036	LANCL3	-1.70674	0.0203968	d7.ab..d7.c				ENSG00000198727.2	ENSG00000198727	MT-CYB	0.631919	0.0386978	d10.ab..d10.c
								ENSG00000256060.2	ENSG00000256060		-1.91886	0.0286009	d1.a..d1.c			ENSG00000037965.4	ENSG00000037965	HOXC8	-1.6861	0.0467291	d1.b..d1.a		ENSG00000091732.11	ENSG00000091732	ZC3HC1	1.96695	0.0273885	d5.ab..d5.c				ENSG00000227486.1	ENSG00000227486		-2.65858	0.0204549	d7.ab..d7.c				ENSG00000204241.3	ENSG00000204241		-3.52544	0.038244	d10.ab..d10.c
								ENSG00000112742.5	ENSG00000112742	TTK	5.45884	0.0289605	d1.a..d1.c			ENSG00000138814.12	ENSG00000138814	PPP3CA	0.826521	0.0467383	d1.b..d1.a		ENSG00000125352.4	ENSG00000125352	RNF113A	-2.32756	0.0273986	d5.ab..d5.c				ENSG00000179743.2	ENSG00000179743		-2.42882	0.0206545	d7.ab..d7.c				ENSG00000206567.5	ENSG00000206567		-1.99553	0.0419854	d10.ab..d10.c
								ENSG00000198075.5	ENSG00000198075	SULT1C4	4.83024	0.0289676	d1.a..d1.c			ENSG00000117682.12	ENSG00000117682	DHDDS	-1.22325	0.0468482	d1.b..d1.a		ENSG00000134056.7	ENSG00000134056	MRPS36	-1.90139	0.0275376	d5.ab..d5.c				ENSG00000260473.1	ENSG00000260473		-2.49447	0.0208078	d7.ab..d7.c				ENSG00000214021.11	ENSG00000214021	TTLL3	-2.49442	0.0441115	d10.ab..d10.c
								ENSG00000198934.3	ENSG00000198934	MAGEE1	4.79716	0.0290252	d1.a..d1.c			ENSG00000154928.12	ENSG00000154928	EPHB1	1.61998	0.0471775	d1.b..d1.a		ENSG00000189057.6	ENSG00000189057	FAM111B	2.19643	0.0278	d5.ab..d5.c				ENSG00000259752.1	ENSG00000259752		-1.77239	0.0210149	d7.ab..d7.c				ENSG00000223579.2	ENSG00000223579		-2.52768	0.0331877	d10.ab..d10.c
								ENSG00000227540.1	ENSG00000227540		4.59866	0.0291534	d1.a..d1.c			ENSG00000078018.15	ENSG00000078018	MAP2	-0.595095	0.0473769	d1.b..d1.a		ENSG00000261884.2	ENSG00000261884		-2.36034	0.0279533	d5.ab..d5.c				ENSG00000255237.1	ENSG00000255237		-3.51195	0.0211417	d7.ab..d7.c				ENSG00000224712.6	ENSG00000224712	NPIPA3	-2.82701	0.040662	d10.ab..d10.c
								ENSG00000130158.9	ENSG00000130158	DOCK6	-2.15045	0.0291869	d1.a..d1.c			ENSG00000099204.14	ENSG00000099204	ABLIM1	-1.15713	0.0479274	d1.b..d1.a		ENSG00000268949.1	ENSG00000268949	MRPS17P1	-3.70443	0.0280308	d5.ab..d5.c				ENSG00000065665.16	ENSG00000065665	SEC61A2	-1.47699	0.021357	d7.ab..d7.c				ENSG00000226784.1	ENSG00000226784	PGAM4	-1.76272	0.0395222	d10.ab..d10.c
								ENSG00000163644.10	ENSG00000163644	PPM1K	-2.08428	0.0291941	d1.a..d1.c			ENSG00000272325.1	ENSG00000272325	NUDT3	0.661217	0.0479408	d1.b..d1.a		ENSG00000148700.9	ENSG00000148700	ADD3	1.34408	0.0281099	d5.ab..d5.c				ENSG00000168175.10	ENSG00000168175	MAPK1IP1L	0.656439	0.0213794	d7.ab..d7.c				ENSG00000226958.1	ENSG00000226958		-2.12857	0.0309748	d10.ab..d10.c
								ENSG00000188321.9	ENSG00000188321	ZNF559	1.62111	0.0292293	d1.a..d1.c			ENSG00000141562.13	ENSG00000141562	NARF	-0.79346	0.0480306	d1.b..d1.a		ENSG00000197769.5	ENSG00000197769	MAP1LC3C	-2.09808	0.0283923	d5.ab..d5.c				ENSG00000136811.12	ENSG00000136811	ODF2	1.47699	0.0214997	d7.ab..d7.c				ENSG00000227558.4	ENSG00000227558		-2.4279	0.0312055	d10.ab..d10.c
								ENSG00000171848.9	ENSG00000171848	RRM2	1.45569	0.0293261	d1.a..d1.c			ENSG00000104725.9	ENSG00000104725		-1.19019	0.0484237	d1.b..d1.a		ENSG00000230067.3	ENSG00000230067	HSPD1P6	-2.39313	0.0284282	d5.ab..d5.c				ENSG00000234964.3	ENSG00000234964	FABP5P7	-1.77239	0.0215334	d7.ab..d7.c				ENSG00000232112.3	ENSG00000232112	TMA7	0.931249	0.0459811	d10.ab..d10.c
								ENSG00000105270.10	ENSG00000105270	CLIP3	-1.88578	0.0294756	d1.a..d1.c			ENSG00000132676.11	ENSG00000132676	DAP3	0.79346	0.0489409	d1.b..d1.a		ENSG00000155304.4	ENSG00000155304	HSPA13	-1.3113	0.028507	d5.ab..d5.c				ENSG00000253203.2	ENSG00000253203	GUSBP3	-0.853371	0.0216021	d7.ab..d7.c				ENSG00000233247.2	ENSG00000233247		-1.82924	0.0394004	d10.ab..d10.c
								ENSG00000196302.5	ENSG00000196302		-3.83773	0.0296929	d1.a..d1.c			ENSG00000160991.11	ENSG00000160991	ORAI2	0.79346	0.0490866	d1.b..d1.a		ENSG00000231312.2	ENSG00000231312		-2.8193	0.0286257	d5.ab..d5.c				ENSG00000235493.1	ENSG00000235493	LINC01967	-1.73956	0.0217378	d7.ab..d7.c				ENSG00000235493.1	ENSG00000235493	LINC01967	-1.89576	0.0396957	d10.ab..d10.c
								ENSG00000102921.3	ENSG00000102921	N4BP1	-2.0512	0.0298181	d1.a..d1.c			ENSG00000102804.10	ENSG00000102804	TSC22D1	0.694278	0.0493361	d1.b..d1.a		ENSG00000204160.7	ENSG00000204160	ZDHHC18	-2.29478	0.0286512	d5.ab..d5.c				ENSG00000204209.6	ENSG00000204209	DAXX	2.52729	0.0217617	d7.ab..d7.c				ENSG00000236552.1	ENSG00000236552	RPL13AP5	-1.89576	0.0387036	d10.ab..d10.c
								ENSG00000136603.9	ENSG00000136603	SKIL	-1.19102	0.0298825	d1.a..d1.c			ENSG00000147145.8	ENSG00000147145	LPAR4	1.48774	0.049356	d1.b..d1.a		ENSG00000164967.5	ENSG00000164967	RPP25L	2.52426	0.0289582	d5.ab..d5.c				ENSG00000133019.7	ENSG00000133019	CHRM3	-2.6914	0.0217761	d7.ab..d7.c				ENSG00000236830.2	ENSG00000236830	CBR3-AS1	-2.92678	0.0492725	d10.ab..d10.c
								ENSG00000141622.9	ENSG00000141622	RNF165	-2.11737	0.0299645	d1.a..d1.c			ENSG00000175792.7	ENSG00000175792	RUVBL1	-0.925704	0.0495844	d1.b..d1.a		ENSG00000163069.8	ENSG00000163069	SGCB	-1.27852	0.0289753	d5.ab..d5.c				ENSG00000234498.2	ENSG00000234498	RPL13AP20	-1.9365	0.021792	d7.ab..d7.c				ENSG00000242267.2	ENSG00000242267	SKINT1L	-1.92902	0.0428166	d10.ab..d10.c
								ENSG00000171456.12	ENSG00000171456	ASXL1	6.68294	0.0303575	d1.a..d1.c			ENSG00000150347.10	ENSG00000150347	ARID5B	1.19019	0.0499569	d1.b..d1.a		ENSG00000155849.11	ENSG00000155849	ELMO1	-2.36034	0.0290092	d5.ab..d5.c				ENSG00000188375.3	ENSG00000188375	H3F3C	-2.10061	0.0218568	d7.ab..d7.c				ENSG00000248458.2	ENSG00000248458		-1.8625	0.0446958	d10.ab..d10.c
								ENSG00000179454.9	ENSG00000179454	KLHL28	-1.62111	0.0303621	d1.a..d1.c			ENSG00000204316.8	ENSG00000204316	MRPL38	-2.11589	0.0499838	d1.b..d1.a		ENSG00000105866.9	ENSG00000105866	SP4	-1.34408	0.0292045	d5.ab..d5.c				ENSG00000204909.3	ENSG00000204909	SPINK9	-2.62576	0.0219032	d7.ab..d7.c				ENSG00000249264.1	ENSG00000249264	EEF1A1P9	-2.72723	0.042113	d10.ab..d10.c
								ENSG00000188158.10	ENSG00000188158	NHS	6.41827	0.0305109	d1.a..d1.c										ENSG00000223745.3	ENSG00000223745	CCDC18-AS1	1.96695	0.0292122	d5.ab..d5.c				ENSG00000232098.2	ENSG00000232098		-1.67392	0.021939	d7.ab..d7.c				ENSG00000253366.2	ENSG00000253366		-2.4279	0.0325942	d10.ab..d10.c
								ENSG00000215717.5	ENSG00000215717	TMEM167B	-3.57306	0.0305876	d1.a..d1.c										ENSG00000213326.4	ENSG00000213326	RPS7P11	-1.67191	0.0293551	d5.ab..d5.c				ENSG00000162430.12	ENSG00000162430	SELENON	2.23189	0.0220234	d7.ab..d7.c				ENSG00000253712.1	ENSG00000253712		-3.05982	0.0354387	d10.ab..d10.c
								ENSG00000132305.16	ENSG00000132305	IMMT	1.29027	0.030626	d1.a..d1.c										ENSG00000102100.10	ENSG00000102100	SLC35A2	-2.78652	0.0294219	d5.ab..d5.c				ENSG00000155849.11	ENSG00000155849	ELMO1	-2.13343	0.0220321	d7.ab..d7.c				ENSG00000254687.1	ENSG00000254687		-2.09531	0.0356208	d10.ab..d10.c
								ENSG00000204130.8	ENSG00000204130	RUFY2	3.67231	0.0308177	d1.a..d1.c										ENSG00000269821.1	ENSG00000269821	KCNQ1OT1	-0.655651	0.0294688	d5.ab..d5.c				ENSG00000162458.8	ENSG00000162458	FBLIM1	-1.73956	0.0222384	d7.ab..d7.c				ENSG00000258363.2	ENSG00000258363		-2.26161	0.0318864	d10.ab..d10.c
								ENSG00000140022.5	ENSG00000140022	STON2	1.0256	0.0310053	d1.a..d1.c										ENSG00000111981.4	ENSG00000111981	ULBP1	-1.93417	0.0294813	d5.ab..d5.c				ENSG00000186130.4	ENSG00000186130	ZBTB6	-2.56011	0.0222738	d7.ab..d7.c				ENSG00000260290.2	ENSG00000260290		-1.96228	0.046807	d10.ab..d10.c
								ENSG00000248780.1	ENSG00000248780	ARL4AP2	-1.65419	0.0311497	d1.a..d1.c										ENSG00000248905.4	ENSG00000248905	FMN1	-2.32756	0.0297476	d5.ab..d5.c				ENSG00000225792.1	ENSG00000225792		-2.29754	0.0226464	d7.ab..d7.c				ENSG00000260747.1	ENSG00000260747		-2.56094	0.0415931	d10.ab..d10.c
								ENSG00000171291.4	ENSG00000171291	ZNF439	-3.63922	0.0311547	d1.a..d1.c										ENSG00000240342.2	ENSG00000240342		-1.63913	0.0298595	d5.ab..d5.c				ENSG00000122218.10	ENSG00000122218	COPA	-1.11595	0.0227175	d7.ab..d7.c				ENSG00000267812.1	ENSG00000267812		-2.49442	0.0401299	d10.ab..d10.c
								ENSG00000163535.13	ENSG00000163535	SGO2	1.88578	0.0311786	d1.a..d1.c										ENSG00000135253.9	ENSG00000135253	KCP	-2.78652	0.0299618	d5.ab..d5.c				ENSG00000003756.12	ENSG00000003756	RBM5	-1.0503	0.0227192	d7.ab..d7.c				ENSG00000270367.1	ENSG00000270367		-1.82924	0.0408504	d10.ab..d10.c
								ENSG00000197044.6	ENSG00000197044	ZNF441	3.73848	0.0312384	d1.a..d1.c										ENSG00000167680.11	ENSG00000167680	SEMA6B	-1.67191	0.0300651	d5.ab..d5.c				ENSG00000258363.2	ENSG00000258363		-2.23189	0.0228312	d7.ab..d7.c				ENSG00000273274.1	ENSG00000273274	ZBTB8B	-2.36138	0.0397521	d10.ab..d10.c
								ENSG00000039560.9	ENSG00000039560	RAI14	1.38952	0.0314915	d1.a..d1.c										ENSG00000012660.9	ENSG00000012660	ELOVL5	0.950694	0.0301269	d5.ab..d5.c				ENSG00000254687.1	ENSG00000254687		-1.70674	0.0229349	d7.ab..d7.c				ENSG00000044459.10	ENSG00000044459	CNTLN	2.09531	0.0363804	d10.ab..d10.c
								ENSG00000213189.4	ENSG00000213189	BTF3L4P2	-1.98503	0.0314984	d1.a..d1.c										ENSG00000120075.5	ENSG00000120075	HOXB5	-1.90139	0.0306438	d5.ab..d5.c				ENSG00000213064.5	ENSG00000213064	SFT2D2	1.18159	0.0229858	d7.ab..d7.c				ENSG00000077514.4	ENSG00000077514	POLD3	2.29486	0.0433191	d10.ab..d10.c
								ENSG00000085840.8	ENSG00000085840	ORC1	3.17605	0.0318763	d1.a..d1.c										ENSG00000269893.2	ENSG00000269893	SNHG8	-1.80304	0.0308883	d5.ab..d5.c				ENSG00000235238.1	ENSG00000235238	SUMO2P1	-1.9365	0.0229888	d7.ab..d7.c				ENSG00000114316.8	ENSG00000114316	USP4	1.96228	0.0402832	d10.ab..d10.c
								ENSG00000130005.7	ENSG00000130005	GAMT	3.73848	0.0319525	d1.a..d1.c										ENSG00000159399.5	ENSG00000159399	HK2	2.29478	0.030924	d5.ab..d5.c				ENSG00000254275.2	ENSG00000254275	LINC00824	-1.70674	0.0232005	d7.ab..d7.c				ENSG00000118965.10	ENSG00000118965	WDR35	1.92902	0.0444772	d10.ab..d10.c
								ENSG00000143401.10	ENSG00000143401	ANP32E	0.86018	0.0320578	d1.a..d1.c										ENSG00000131914.6	ENSG00000131914	LIN28A	-1.11461	0.0311479	d5.ab..d5.c				ENSG00000174136.7	ENSG00000174136	RGMB	-2.56011	0.0233278	d7.ab..d7.c				ENSG00000120832.5	ENSG00000120832	MTERF2	1.89576	0.0421639	d10.ab..d10.c
								ENSG00000154721.10	ENSG00000154721	JAM2	-1.09177	0.032215	d1.a..d1.c										ENSG00000164898.8	ENSG00000164898	FMC1	-1.73748	0.0317868	d5.ab..d5.c				ENSG00000164403.10	ENSG00000164403	SHROOM1	-2.6914	0.023328	d7.ab..d7.c				ENSG00000121039.5	ENSG00000121039	RDH10	2.26161	0.0376773	d10.ab..d10.c
								ENSG00000163904.8	ENSG00000163904	SENP2	-1.75344	0.0323215	d1.a..d1.c										ENSG00000254687.1	ENSG00000254687		-1.67191	0.0317953	d5.ab..d5.c				ENSG00000117862.7	ENSG00000117862	TXNDC12	1.21441	0.0233349	d7.ab..d7.c				ENSG00000124782.15	ENSG00000124782	RREB1	3.49219	0.039285	d10.ab..d10.c
								ENSG00000136108.10	ENSG00000136108	CKAP2	1.35644	0.0323692	d1.a..d1.c										ENSG00000242262.1	ENSG00000242262		-1.70469	0.0321335	d5.ab..d5.c				ENSG00000215014.3	ENSG00000215014		-2.56011	0.0235187	d7.ab..d7.c				ENSG00000129187.10	ENSG00000129187	DCTD	2.19509	0.0498157	d10.ab..d10.c
								ENSG00000183150.3	ENSG00000183150	GPR19	-1.78653	0.0326572	d1.a..d1.c										ENSG00000268032.3	ENSG00000268032		-2.262	0.0321461	d5.ab..d5.c				ENSG00000259969.1	ENSG00000259969		-2.82269	0.0236087	d7.ab..d7.c				ENSG00000139618.10	ENSG00000139618	BRCA2	1.79598	0.0491484	d10.ab..d10.c
								ENSG00000032389.8	ENSG00000032389	EIPR1	-1.98503	0.0327181	d1.a..d1.c										ENSG00000124201.10	ENSG00000124201	ZNFX1	2.6226	0.0321583	d5.ab..d5.c				ENSG00000089737.11	ENSG00000089737	DDX24	-1.01748	0.0236295	d7.ab..d7.c				ENSG00000144354.9	ENSG00000144354	CDCA7	2.4279	0.0485962	d10.ab..d10.c
								ENSG00000164294.9	ENSG00000164294	GPX8	1.48877	0.0330521	d1.a..d1.c										ENSG00000231890.3	ENSG00000231890	DARS-AS1	-2.91765	0.0325469	d5.ab..d5.c				ENSG00000106258.9	ENSG00000106258	CYP3A5	-1.87085	0.0237537	d7.ab..d7.c				ENSG00000145375.7	ENSG00000145375	SPATA5	2.82701	0.0415731	d10.ab..d10.c
								ENSG00000142534.2	ENSG00000142534	RPS11	-0.760929	0.033103	d1.a..d1.c										ENSG00000260747.1	ENSG00000260747		-1.93417	0.0326521	d5.ab..d5.c				ENSG00000142731.6	ENSG00000142731	PLK4	2.26471	0.0239544	d7.ab..d7.c				ENSG00000164171.6	ENSG00000164171	ITGA2	2.59419	0.0344672	d10.ab..d10.c
								ENSG00000085063.10	ENSG00000085063	CD59	1.05868	0.0332409	d1.a..d1.c										ENSG00000026025.9	ENSG00000026025	VIM	0.721216	0.0326961	d5.ab..d5.c				ENSG00000217624.2	ENSG00000217624		-1.77239	0.0241026	d7.ab..d7.c				ENSG00000166025.13	ENSG00000166025	AMOTL1	1.8625	0.0481671	d10.ab..d10.c
								ENSG00000253366.2	ENSG00000253366		-1.98503	0.0334334	d1.a..d1.c										ENSG00000129315.5	ENSG00000129315	CCNT1	-1.08182	0.0326971	d5.ab..d5.c				ENSG00000165443.7	ENSG00000165443	PHYHIPL	-1.24723	0.0241248	d7.ab..d7.c
								ENSG00000120334.11	ENSG00000120334	CENPL	3.40764	0.0334495	d1.a..d1.c										ENSG00000260908.1	ENSG00000260908		-3.31104	0.0327082	d5.ab..d5.c				ENSG00000184445.7	ENSG00000184445	KNTC1	1.41134	0.024371	d7.ab..d7.c
								ENSG00000136504.7	ENSG00000136504	KAT7	-1.58802	0.033503	d1.a..d1.c										ENSG00000156374.10	ENSG00000156374	PCGF6	1.73748	0.0328029	d5.ab..d5.c				ENSG00000115756.8	ENSG00000115756	HPCAL1	-1.77239	0.024479	d7.ab..d7.c
								ENSG00000128394.12	ENSG00000128394	APOBEC3F	-3.37455	0.0335897	d1.a..d1.c										ENSG00000124767.6	ENSG00000124767	GLO1	0.786781	0.033049	d5.ab..d5.c				ENSG00000174469.13	ENSG00000174469	CNTNAP2	-2.19907	0.0245489	d7.ab..d7.c
								ENSG00000154920.10	ENSG00000154920	EME1	4.73099	0.0337241	d1.a..d1.c										ENSG00000178809.7	ENSG00000178809	TRIM73	-2.13087	0.033282	d5.ab..d5.c				ENSG00000166451.9	ENSG00000166451	CENPN	1.37852	0.0246855	d7.ab..d7.c
								ENSG00000153721.13	ENSG00000153721	CNKSR3	1.58802	0.0337511	d1.a..d1.c										ENSG00000144895.7	ENSG00000144895	EIF2A	-1.08182	0.033428	d5.ab..d5.c				ENSG00000133731.5	ENSG00000133731	IMPA1	2.72422	0.0247281	d7.ab..d7.c
								ENSG00000186814.8	ENSG00000186814	ZSCAN30	-4.06931	0.0340222	d1.a..d1.c										ENSG00000112139.10	ENSG00000112139	MDGA1	-2.29478	0.0335892	d5.ab..d5.c				ENSG00000139364.6	ENSG00000139364	TMEM132B	-2.56011	0.0248063	d7.ab..d7.c
								ENSG00000169371.9	ENSG00000169371	SNUPN	4.73099	0.0343989	d1.a..d1.c										ENSG00000263812.1	ENSG00000263812	LINC00908	-1.96695	0.0337738	d5.ab..d5.c				ENSG00000143013.8	ENSG00000143013	LMO4	-2.396	0.0251294	d7.ab..d7.c
								ENSG00000156831.3	ENSG00000156831	NSMCE2	-1.95195	0.0344274	d1.a..d1.c										ENSG00000250682.1	ENSG00000250682	LINC00491	-2.262	0.0337973	d5.ab..d5.c				ENSG00000120802.9	ENSG00000120802	TMPO	0.754905	0.0251615	d7.ab..d7.c
								ENSG00000137154.8	ENSG00000137154	RPS6	-0.760929	0.034487	d1.a..d1.c										ENSG00000168710.13	ENSG00000168710	AHCYL1	-0.983477	0.0338718	d5.ab..d5.c				ENSG00000167703.10	ENSG00000167703	SLC43A2	-1.9365	0.0254683	d7.ab..d7.c
								ENSG00000144406.14	ENSG00000144406	UNC80	-2.28279	0.0345018	d1.a..d1.c										ENSG00000136718.5	ENSG00000136718	IMP4	1.90139	0.034071	d5.ab..d5.c				ENSG00000119559.11	ENSG00000119559	C19orf25	-2.16625	0.0255166	d7.ab..d7.c
								ENSG00000111859.12	ENSG00000111859	NEDD9	1.91886	0.0346681	d1.a..d1.c										ENSG00000108828.11	ENSG00000108828	VAT1	-1.14739	0.0341721	d5.ab..d5.c				ENSG00000074266.13	ENSG00000074266	EED	1.96932	0.0256231	d7.ab..d7.c
								ENSG00000124374.8	ENSG00000124374	PAIP2B	2.18353	0.0346942	d1.a..d1.c										ENSG00000104723.16	ENSG00000104723	TUSC3	-1.63913	0.0342939	d5.ab..d5.c				ENSG00000261653.1	ENSG00000261653		-2.62576	0.0257346	d7.ab..d7.c
								ENSG00000160710.11	ENSG00000160710	ADAR	1.88578	0.0346952	d1.a..d1.c										ENSG00000270173.1	ENSG00000270173		-2.16365	0.0343519	d5.ab..d5.c				ENSG00000232561.2	ENSG00000232561		-1.60828	0.0257882	d7.ab..d7.c
								ENSG00000111667.9	ENSG00000111667	USP5	3.63922	0.0347687	d1.a..d1.c										ENSG00000153283.8	ENSG00000153283	CD96	-1.99974	0.0343759	d5.ab..d5.c				ENSG00000254701.2	ENSG00000254701		-2.19907	0.0258477	d7.ab..d7.c
								ENSG00000072571.15	ENSG00000072571	HMMR	5.95509	0.034855	d1.a..d1.c										ENSG00000230979.3	ENSG00000230979		-1.73748	0.0346425	d5.ab..d5.c				ENSG00000150076.18	ENSG00000150076		-2.52729	0.0258982	d7.ab..d7.c
								ENSG00000197712.7	ENSG00000197712	FAM114A1	5.06183	0.0349772	d1.a..d1.c										ENSG00000166562.4	ENSG00000166562	SEC11C	-1.83582	0.0347769	d5.ab..d5.c				ENSG00000187741.10	ENSG00000187741	FANCA	4.49661	0.0260803	d7.ab..d7.c
								ENSG00000134333.9	ENSG00000134333	LDHA	1.91886	0.0349843	d1.a..d1.c										ENSG00000115756.8	ENSG00000115756	HPCAL1	-1.77026	0.035118	d5.ab..d5.c				ENSG00000015153.10	ENSG00000015153	YAF2	-1.80521	0.0263446	d7.ab..d7.c
								ENSG00000137343.13	ENSG00000137343	ATAT1	-1.81961	0.0350072	d1.a..d1.c										ENSG00000196656.6	ENSG00000196656		-1.67191	0.0351741	d5.ab..d5.c				ENSG00000197037.6	ENSG00000197037	ZSCAN25	-1.96932	0.026415	d7.ab..d7.c
								ENSG00000100596.2	ENSG00000100596	SPTLC2	5.72351	0.035025	d1.a..d1.c										ENSG00000164199.11	ENSG00000164199	ADGRV1	1.11461	0.0354243	d5.ab..d5.c				ENSG00000249264.1	ENSG00000249264	EEF1A1P9	-2.78987	0.0265408	d7.ab..d7.c
								ENSG00000109680.6	ENSG00000109680	TBC1D19	-3.37455	0.0351816	d1.a..d1.c										ENSG00000249119.1	ENSG00000249119	MTND6P4	-1.54078	0.0359375	d5.ab..d5.c				ENSG00000259445.1	ENSG00000259445		-2.62576	0.0265727	d7.ab..d7.c
								ENSG00000225733.1	ENSG00000225733	FGD5-AS1	1.52186	0.0352628	d1.a..d1.c										ENSG00000120832.5	ENSG00000120832	MTERF2	1.47522	0.0362851	d5.ab..d5.c				ENSG00000233087.4	ENSG00000233087		-2.6914	0.0266588	d7.ab..d7.c
								ENSG00000121578.8	ENSG00000121578	B4GALT4	-2.67979	0.0353729	d1.a..d1.c										ENSG00000197780.5	ENSG00000197780	TAF13	-1.63913	0.036564	d5.ab..d5.c				ENSG00000214645.3	ENSG00000214645		-1.83803	0.0267091	d7.ab..d7.c
								ENSG00000084444.9	ENSG00000084444	FAM234B	-1.05868	0.0355046	d1.a..d1.c										ENSG00000214975.4	ENSG00000214975	PPIAP29	-1.70469	0.0365958	d5.ab..d5.c				ENSG00000215504.2	ENSG00000215504		-1.96932	0.0268083	d7.ab..d7.c
								ENSG00000066279.12	ENSG00000066279	ASPM	2.41512	0.0356668	d1.a..d1.c										ENSG00000119705.5	ENSG00000119705	SLIRP	-1.57356	0.0368513	d5.ab..d5.c				ENSG00000065328.12	ENSG00000065328	MCM10	1.54263	0.0271162	d7.ab..d7.c
								ENSG00000163191.5	ENSG00000163191	S100A11	5.55809	0.0357521	d1.a..d1.c										ENSG00000219133.2	ENSG00000219133		-1.63913	0.03713	d5.ab..d5.c				ENSG00000143494.11	ENSG00000143494	VASH2	-2.95398	0.027304	d7.ab..d7.c
								ENSG00000129315.5	ENSG00000129315	CCNT1	-1.62111	0.0357939	d1.a..d1.c										ENSG00000138380.13	ENSG00000138380	CARF	-1.86861	0.037152	d5.ab..d5.c				ENSG00000115355.11	ENSG00000115355	CCDC88A	-0.886193	0.0273339	d7.ab..d7.c
								ENSG00000108179.9	ENSG00000108179	PPIF	4.66482	0.0360946	d1.a..d1.c										ENSG00000223709.4	ENSG00000223709	TRIM64EP	-1.67191	0.0373707	d5.ab..d5.c				ENSG00000111321.6	ENSG00000111321	LTBR	-2.396	0.0274391	d7.ab..d7.c
								ENSG00000166147.9	ENSG00000166147	FBN1	5.75659	0.0361984	d1.a..d1.c										ENSG00000106086.14	ENSG00000106086	PLEKHA8	-1.63913	0.037472	d5.ab..d5.c				ENSG00000227081.4	ENSG00000227081		-1.96932	0.0274511	d7.ab..d7.c
								ENSG00000113140.6	ENSG00000113140	SPARC	0.926348	0.0362138	d1.a..d1.c										ENSG00000205336.7	ENSG00000205336	ADGRG1	-1.67191	0.0374906	d5.ab..d5.c				ENSG00000143418.15	ENSG00000143418	CERS2	2.16625	0.0276632	d7.ab..d7.c
								ENSG00000149591.12	ENSG00000149591	TAGLN	6.41827	0.0363176	d1.a..d1.c										ENSG00000080822.12	ENSG00000080822	CLDND1	-0.885129	0.0377033	d5.ab..d5.c				ENSG00000246859.2	ENSG00000246859	STARD4-AS1	-1.01748	0.0277073	d7.ab..d7.c
								ENSG00000174748.14	ENSG00000174748	RPL15	-0.595509	0.0363866	d1.a..d1.c										ENSG00000108448.16	ENSG00000108448	TRIM16L	-1.508	0.0377219	d5.ab..d5.c				ENSG00000167680.11	ENSG00000167680	SEMA6B	-1.87085	0.0277555	d7.ab..d7.c
								ENSG00000149948.9	ENSG00000149948	HMGA2	0.992516	0.0365321	d1.a..d1.c										ENSG00000143333.6	ENSG00000143333	RGS16	-2.58982	0.0378862	d5.ab..d5.c				ENSG00000176945.12	ENSG00000176945	MUC20	-2.65858	0.0278691	d7.ab..d7.c
								ENSG00000080298.11	ENSG00000080298	RFX3	-1.12485	0.0366638	d1.a..d1.c										ENSG00000182902.9	ENSG00000182902	SLC25A18	-2.262	0.0380269	d5.ab..d5.c				ENSG00000144369.8	ENSG00000144369	FAM171B	-1.08312	0.0279287	d7.ab..d7.c
								ENSG00000126950.7	ENSG00000126950	TMEM35A	-3.37455	0.037151	d1.a..d1.c										ENSG00000198064.9	ENSG00000198064	NPIPB13	-1.508	0.0380442	d5.ab..d5.c				ENSG00000154803.8	ENSG00000154803	FLCN	-2.00214	0.0279631	d7.ab..d7.c
								ENSG00000167553.10	ENSG00000167553	TUBA1C	0.827096	0.0373899	d1.a..d1.c										ENSG00000231434.1	ENSG00000231434		-2.85208	0.0381795	d5.ab..d5.c				ENSG00000156787.12	ENSG00000156787	TBC1D31	2.03496	0.0280985	d7.ab..d7.c
								ENSG00000069812.7	ENSG00000069812	HES2	-3.57306	0.0376977	d1.a..d1.c										ENSG00000148516.17	ENSG00000148516	ZEB1	-0.917912	0.0381998	d5.ab..d5.c				ENSG00000175611.7	ENSG00000175611	LINC00476	-2.62576	0.0285045	d7.ab..d7.c
								ENSG00000151575.10	ENSG00000151575	TEX9	3.70539	0.0378966	d1.a..d1.c										ENSG00000175792.7	ENSG00000175792	RUVBL1	2.03252	0.0384539	d5.ab..d5.c				ENSG00000138468.11	ENSG00000138468	SENP7	-1.01748	0.0285207	d7.ab..d7.c
								ENSG00000140525.13	ENSG00000140525	FANCI	1.48877	0.038018	d1.a..d1.c										ENSG00000108018.11	ENSG00000108018	SORCS1	-2.49147	0.0388172	d5.ab..d5.c				ENSG00000071242.7	ENSG00000071242	RPS6KA2	-2.19907	0.0288252	d7.ab..d7.c
								ENSG00000099204.14	ENSG00000099204	ABLIM1	1.98503	0.0382986	d1.a..d1.c										ENSG00000185985.7	ENSG00000185985	SLITRK2	1.11461	0.0388262	d5.ab..d5.c				ENSG00000250127.1	ENSG00000250127	LINC02108	-1.6411	0.0291181	d7.ab..d7.c
								ENSG00000167380.12	ENSG00000167380	ZNF226	-2.15045	0.0385	d1.a..d1.c										ENSG00000232098.2	ENSG00000232098		-1.63913	0.0389649	d5.ab..d5.c				ENSG00000159335.11	ENSG00000159335	PTMS	-2.46165	0.0291702	d7.ab..d7.c
								ENSG00000108654.7	ENSG00000108654	DDX5	-0.628593	0.0388483	d1.a..d1.c										ENSG00000176018.8	ENSG00000176018	LYSMD3	1.86861	0.0389899	d5.ab..d5.c				ENSG00000213096.5	ENSG00000213096	ZNF254	-1.41134	0.0292241	d7.ab..d7.c
								ENSG00000179915.16	ENSG00000179915	NRXN1	4.56557	0.0388866	d1.a..d1.c										ENSG00000169554.12	ENSG00000169554	ZEB2	0.721216	0.0393795	d5.ab..d5.c				ENSG00000094914.8	ENSG00000094914	AAAS	1.47699	0.0293655	d7.ab..d7.c
								ENSG00000118523.5	ENSG00000118523	CTGF	2.34895	0.0390559	d1.a..d1.c										ENSG00000249409.1	ENSG00000249409		-1.96695	0.0403792	d5.ab..d5.c				ENSG00000204794.6	ENSG00000204794		-2.42882	0.029372	d7.ab..d7.c
								ENSG00000142627.9	ENSG00000142627	EPHA2	-2.48129	0.0390794	d1.a..d1.c										ENSG00000163798.9	ENSG00000163798	SLC4A1AP	-1.57356	0.0404634	d5.ab..d5.c				ENSG00000163808.12	ENSG00000163808	KIF15	1.57545	0.0293885	d7.ab..d7.c
								ENSG00000169607.8	ENSG00000169607	CKAP2L	2.54746	0.0390992	d1.a..d1.c										ENSG00000071537.9	ENSG00000071537	SEL1L	1.508	0.0405563	d5.ab..d5.c				ENSG00000267302.1	ENSG00000267302		3.61041	0.029394	d7.ab..d7.c
								ENSG00000113532.8	ENSG00000113532	ST8SIA4	-3.2753	0.0392992	d1.a..d1.c										ENSG00000213949.4	ENSG00000213949	ITGA1	-1.54078	0.0407104	d5.ab..d5.c				ENSG00000105894.7	ENSG00000105894	PTN	1.08312	0.0295351	d7.ab..d7.c
								ENSG00000100767.11	ENSG00000100767	PAPLN	-4.26782	0.0393167	d1.a..d1.c										ENSG00000230455.2	ENSG00000230455		-1.96695	0.0408386	d5.ab..d5.c				ENSG00000123119.7	ENSG00000123119	NECAB1	5.25151	0.02968	d7.ab..d7.c
								ENSG00000149548.10	ENSG00000149548	CCDC15	4.56557	0.039368	d1.a..d1.c										ENSG00000117289.7	ENSG00000117289		0.786781	0.0408883	d5.ab..d5.c				ENSG00000128383.8	ENSG00000128383	APOBEC3A	-2.16625	0.0297014	d7.ab..d7.c
								ENSG00000214021.11	ENSG00000214021	TTLL3	-2.48129	0.0395694	d1.a..d1.c										ENSG00000225883.2	ENSG00000225883	BMS1P11	-2.68817	0.0410341	d5.ab..d5.c				ENSG00000187134.8	ENSG00000187134	AKR1C1	-2.56011	0.029708	d7.ab..d7.c
								ENSG00000136866.9	ENSG00000136866	ZFP37	3.50689	0.0398755	d1.a..d1.c										ENSG00000248477.2	ENSG00000248477		-2.262	0.0412583	d5.ab..d5.c				ENSG00000162654.8	ENSG00000162654	GBP4	-1.80521	0.0297498	d7.ab..d7.c
								ENSG00000132294.9	ENSG00000132294	EFR3A	-3.57306	0.0399076	d1.a..d1.c										ENSG00000100614.13	ENSG00000100614	PPM1A	-1.21295	0.0412703	d5.ab..d5.c				ENSG00000053108.12	ENSG00000053108	FSTL4	-2.00214	0.0297909	d7.ab..d7.c
								ENSG00000152133.10	ENSG00000152133	GPATCH11	4.23473	0.0399676	d1.a..d1.c										ENSG00000227081.4	ENSG00000227081		-1.67191	0.0412822	d5.ab..d5.c				ENSG00000187323.7	ENSG00000187323	DCC	-1.6411	0.0298449	d7.ab..d7.c
								ENSG00000175155.4	ENSG00000175155	YPEL2	-2.51437	0.0402392	d1.a..d1.c										ENSG00000134265.8	ENSG00000134265	NAPG	-1.44243	0.0413486	d5.ab..d5.c				ENSG00000148120.10	ENSG00000148120	C9orf3	-2.62576	0.0299513	d7.ab..d7.c
								ENSG00000113569.11	ENSG00000113569	NUP155	1.35644	0.0403111	d1.a..d1.c										ENSG00000114978.13	ENSG00000114978	MOB1A	0.786781	0.0414681	d5.ab..d5.c				ENSG00000219133.2	ENSG00000219133		-1.80521	0.0300311	d7.ab..d7.c
								ENSG00000143437.16	ENSG00000143437	ARNT	-1.78653	0.0403268	d1.a..d1.c										ENSG00000166887.11	ENSG00000166887	VPS39	1.99974	0.0414882	d5.ab..d5.c				ENSG00000091542.8	ENSG00000091542	ALKBH5	1.96932	0.0301268	d7.ab..d7.c
								ENSG00000102804.10	ENSG00000102804	TSC22D1	-1.09177	0.0403625	d1.a..d1.c										ENSG00000163633.6	ENSG00000163633	C4orf36	-1.80304	0.0415516	d5.ab..d5.c				ENSG00000137274.8	ENSG00000137274	BPHL	-1.54263	0.030142	d7.ab..d7.c
								ENSG00000083845.4	ENSG00000083845	RPS5	-0.827096	0.0407434	d1.a..d1.c										ENSG00000134077.11	ENSG00000134077	THUMPD3	2.0653	0.042172	d5.ab..d5.c				ENSG00000184743.8	ENSG00000184743	ATL3	3.2822	0.0301728	d7.ab..d7.c
								ENSG00000181234.8	ENSG00000181234	TMEM132C	4.16857	0.0408184	d1.a..d1.c										ENSG00000165699.9	ENSG00000165699	TSC1	-1.14739	0.0421743	d5.ab..d5.c				ENSG00000155158.16	ENSG00000155158	TTC39B	-2.10061	0.0302869	d7.ab..d7.c
								ENSG00000170854.13	ENSG00000170854	RIOX2	5.55809	0.0408703	d1.a..d1.c										ENSG00000247809.3	ENSG00000247809	NR2F2-AS1	1.37687	0.0425018	d5.ab..d5.c				ENSG00000076382.12	ENSG00000076382	SPAG5	1.54263	0.0303109	d7.ab..d7.c
								ENSG00000110063.4	ENSG00000110063	DCPS	4.1024	0.0409491	d1.a..d1.c										ENSG00000105379.5	ENSG00000105379	ETFB	-1.57356	0.0426223	d5.ab..d5.c				ENSG00000139546.6	ENSG00000139546	TARBP2	1.83803	0.030643	d7.ab..d7.c
								ENSG00000185885.11	ENSG00000185885	IFITM1	2.67979	0.0412572	d1.a..d1.c										ENSG00000257950.3	ENSG00000257950	P2RX5-TAX1BP3	-2.6226	0.0428456	d5.ab..d5.c				ENSG00000187715.9	ENSG00000187715	KBTBD12	-2.6914	0.0307127	d7.ab..d7.c
								ENSG00000100354.16	ENSG00000100354	TNRC6B	-0.926348	0.0413348	d1.a..d1.c										ENSG00000126775.8	ENSG00000126775	ATG14	-1.70469	0.0428674	d5.ab..d5.c				ENSG00000213411.2	ENSG00000213411	RBM22P2	-2.00214	0.0309277	d7.ab..d7.c
								ENSG00000116741.6	ENSG00000116741	RGS2	-2.94446	0.0416046	d1.a..d1.c										ENSG00000145191.7	ENSG00000145191	EIF2B5	-1.80304	0.0429458	d5.ab..d5.c				ENSG00000134757.4	ENSG00000134757	DSG3	-1.60828	0.0311452	d7.ab..d7.c
								ENSG00000166881.5	ENSG00000166881	NEMP1	2.15045	0.0417553	d1.a..d1.c										ENSG00000141232.4	ENSG00000141232	TOB1	-0.622869	0.0429939	d5.ab..d5.c				ENSG00000116299.12	ENSG00000116299	KIAA1324	-2.13343	0.03121	d7.ab..d7.c
								ENSG00000196466.6	ENSG00000196466	ZNF799	2.54746	0.0417766	d1.a..d1.c										ENSG00000136193.12	ENSG00000136193	SCRN1	-1.24574	0.0433	d5.ab..d5.c				ENSG00000258169.1	ENSG00000258169	LINC00485	-2.6914	0.0312539	d7.ab..d7.c
								ENSG00000173846.8	ENSG00000173846	PLK3	-3.53997	0.0419678	d1.a..d1.c										ENSG00000056586.11	ENSG00000056586	RC3H2	-1.11461	0.0434196	d5.ab..d5.c				ENSG00000166262.11	ENSG00000166262	FAM227B	-2.36318	0.031403	d7.ab..d7.c
								ENSG00000184384.9	ENSG00000184384	MAML2	-2.51437	0.0420236	d1.a..d1.c										ENSG00000212994.4	ENSG00000212994	RPS26P6	-2.0653	0.0441798	d5.ab..d5.c				ENSG00000251379.1	ENSG00000251379		-2.95398	0.0314229	d7.ab..d7.c
								ENSG00000152268.8	ENSG00000152268		1.09177	0.0425499	d1.a..d1.c										ENSG00000142197.8	ENSG00000142197	DOPEY2	-2.262	0.0441861	d5.ab..d5.c				ENSG00000144354.9	ENSG00000144354	CDCA7	1.67392	0.0315304	d7.ab..d7.c
								ENSG00000092969.7	ENSG00000092969	TGFB2	4.86333	0.0427719	d1.a..d1.c										ENSG00000144619.10	ENSG00000144619	CNTN4	-1.80304	0.0442038	d5.ab..d5.c				ENSG00000270072.1	ENSG00000270072		-2.95398	0.0316293	d7.ab..d7.c
								ENSG00000181827.10	ENSG00000181827	RFX7	1.38952	0.0429215	d1.a..d1.c										ENSG00000258363.2	ENSG00000258363		-1.96695	0.0442528	d5.ab..d5.c				ENSG00000156103.11	ENSG00000156103	MMP16	-1.11595	0.031909	d7.ab..d7.c
								ENSG00000234616.4	ENSG00000234616	JRK	3.53997	0.0434238	d1.a..d1.c										ENSG00000160991.11	ENSG00000160991	ORAI2	-1.14739	0.0443683	d5.ab..d5.c				ENSG00000101004.10	ENSG00000101004	NINL	-1.47699	0.0321075	d7.ab..d7.c
								ENSG00000047346.8	ENSG00000047346	FAM214A	-2.77904	0.0437901	d1.a..d1.c										ENSG00000120992.13	ENSG00000120992	LYPLA1	0.917912	0.0444275	d5.ab..d5.c				ENSG00000114978.13	ENSG00000114978	MOB1A	1.11595	0.0321208	d7.ab..d7.c
								ENSG00000163328.9	ENSG00000163328	GPR155	2.21662	0.0441546	d1.a..d1.c										ENSG00000163683.7	ENSG00000163683	SMIM14	-1.04904	0.0445452	d5.ab..d5.c				ENSG00000185436.7	ENSG00000185436	IFNLR1	-2.72422	0.0321331	d7.ab..d7.c
								ENSG00000176014.8	ENSG00000176014	TUBB6	2.54746	0.0444565	d1.a..d1.c										ENSG00000138162.13	ENSG00000138162	TACC2	-1.96695	0.0447898	d5.ab..d5.c				ENSG00000136108.10	ENSG00000136108	CKAP2	1.08312	0.032495	d7.ab..d7.c
								ENSG00000105968.14	ENSG00000105968	H2AFV	1.15793	0.0450248	d1.a..d1.c										ENSG00000152749.7	ENSG00000152749	GPR180	1.73748	0.045049	d5.ab..d5.c				ENSG00000227558.4	ENSG00000227558		-2.16625	0.0325999	d7.ab..d7.c
								ENSG00000171262.7	ENSG00000171262	FAM98B	3.87081	0.0451774	d1.a..d1.c										ENSG00000150776.13	ENSG00000150776	C11orf57	-1.27852	0.045311	d5.ab..d5.c				ENSG00000135090.9	ENSG00000135090	TAOK3	-1.67392	0.0326053	d7.ab..d7.c
								ENSG00000175455.10	ENSG00000175455	CCDC14	1.25719	0.0456106	d1.a..d1.c										ENSG00000254275.2	ENSG00000254275	LINC00824	-1.508	0.0453321	d5.ab..d5.c				ENSG00000212664.4	ENSG00000212664		-1.73956	0.032615	d7.ab..d7.c
								ENSG00000258827.2	ENSG00000258827		-2.18353	0.0456646	d1.a..d1.c										ENSG00000131100.8	ENSG00000131100	ATP6V1E1	-1.57356	0.0455042	d5.ab..d5.c				ENSG00000133961.15	ENSG00000133961	NUMB	-1.50981	0.0330284	d7.ab..d7.c
								ENSG00000143995.15	ENSG00000143995	MEIS1	-1.35644	0.0457185	d1.a..d1.c										ENSG00000241556.1	ENSG00000241556		-2.09808	0.045667	d5.ab..d5.c				ENSG00000163866.8	ENSG00000163866	SMIM12	-1.83803	0.0330285	d7.ab..d7.c
								ENSG00000196230.8	ENSG00000196230	TUBB	0.727845	0.0457749	d1.a..d1.c										ENSG00000165506.10	ENSG00000165506	DNAAF2	-1.80304	0.0456917	d5.ab..d5.c				ENSG00000141622.9	ENSG00000141622	RNF165	-1.14877	0.0332255	d7.ab..d7.c
								ENSG00000179242.11	ENSG00000179242	CDH4	-2.18353	0.0461672	d1.a..d1.c										ENSG00000187193.8	ENSG00000187193	MT1X	-3.44217	0.0458259	d5.ab..d5.c				ENSG00000128641.13	ENSG00000128641	MYO1B	-1.44417	0.0332681	d7.ab..d7.c
								ENSG00000073111.9	ENSG00000073111	MCM2	1.38952	0.046489	d1.a..d1.c										ENSG00000240535.4	ENSG00000240535		-2.6226	0.0458802	d5.ab..d5.c				ENSG00000196712.12	ENSG00000196712	NF1	-1.01748	0.033275	d7.ab..d7.c
								ENSG00000129636.8	ENSG00000129636	ITFG1	-1.78653	0.0467445	d1.a..d1.c										ENSG00000115525.12	ENSG00000115525	ST3GAL5	-2.09808	0.045924	d5.ab..d5.c				ENSG00000253284.2	ENSG00000253284		1.6411	0.0332799	d7.ab..d7.c
								ENSG00000167325.10	ENSG00000167325	RRM1	1.38952	0.0467795	d1.a..d1.c										ENSG00000065883.10	ENSG00000065883	CDK13	1.14739	0.046005	d5.ab..d5.c				ENSG00000169118.11	ENSG00000169118	CSNK1G1	1.87085	0.0333505	d7.ab..d7.c
								ENSG00000162734.8	ENSG00000162734	PEA15	5.42575	0.0471427	d1.a..d1.c										ENSG00000204420.4	ENSG00000204420	MPIG6B	-2.98321	0.0462233	d5.ab..d5.c				ENSG00000197410.8	ENSG00000197410	DCHS2	-2.85551	0.0334676	d7.ab..d7.c
								ENSG00000123349.9	ENSG00000123349	PFDN5	-0.893264	0.0471591	d1.a..d1.c										ENSG00000138764.9	ENSG00000138764	CCNG2	-1.60635	0.04629	d5.ab..d5.c				ENSG00000177058.7	ENSG00000177058	SLC38A9	-1.87085	0.0335911	d7.ab..d7.c
								ENSG00000171316.7	ENSG00000171316	CHD7	-0.760929	0.0471866	d1.a..d1.c										ENSG00000167771.5	ENSG00000167771	RCOR2	-2.85208	0.0463356	d5.ab..d5.c				ENSG00000196505.6	ENSG00000196505	GDAP2	-1.60828	0.033751	d7.ab..d7.c
								ENSG00000078018.15	ENSG00000078018	MAP2	1.12485	0.0472289	d1.a..d1.c										ENSG00000104219.8	ENSG00000104219	ZDHHC2	1.18017	0.046784	d5.ab..d5.c				ENSG00000167765.3	ENSG00000167765		-2.52729	0.033822	d7.ab..d7.c
								ENSG00000271971.1	ENSG00000271971		3.34147	0.0472934	d1.a..d1.c										ENSG00000106069.16	ENSG00000106069	CHN2	-1.99974	0.0469304	d5.ab..d5.c				ENSG00000153815.12	ENSG00000153815	CMIP	-2.59293	0.033941	d7.ab..d7.c
								ENSG00000187446.7	ENSG00000187446	CHP1	-0.661677	0.0472936	d1.a..d1.c										ENSG00000082684.10	ENSG00000082684	SEMA5B	1.93417	0.047026	d5.ab..d5.c				ENSG00000162852.9	ENSG00000162852	CNST	-2.46165	0.0339961	d7.ab..d7.c
								ENSG00000225071.1	ENSG00000225071		-3.24222	0.0473218	d1.a..d1.c										ENSG00000196482.12	ENSG00000196482	ESRRG	-2.22921	0.047105	d5.ab..d5.c				ENSG00000236552.1	ENSG00000236552	RPL13AP5	-1.57545	0.034055	d7.ab..d7.c
								ENSG00000112394.12	ENSG00000112394	SLC16A10	-2.67979	0.0474161	d1.a..d1.c										ENSG00000189114.6	ENSG00000189114	BLOC1S3	-1.40965	0.0472002	d5.ab..d5.c				ENSG00000261568.1	ENSG00000261568		-3.01962	0.0342753	d7.ab..d7.c
								ENSG00000163312.6	ENSG00000163312	HELQ	5.62425	0.0474541	d1.a..d1.c										ENSG00000152457.13	ENSG00000152457	DCLRE1C	0.688434	0.0473452	d5.ab..d5.c				ENSG00000205572.5	ENSG00000205572	SERF1B	-1.73956	0.0343218	d7.ab..d7.c
								ENSG00000171298.8	ENSG00000171298	GAA	-2.54746	0.0474785	d1.a..d1.c										ENSG00000110925.2	ENSG00000110925	CSRNP2	-2.45869	0.0476371	d5.ab..d5.c				ENSG00000205356.5	ENSG00000205356	TECPR1	-2.36318	0.0345038	d7.ab..d7.c
								ENSG00000139318.7	ENSG00000139318	DUSP6	1.55494	0.0476693	d1.a..d1.c										ENSG00000143164.11	ENSG00000143164	DCAF6	2.0653	0.0476545	d5.ab..d5.c				ENSG00000142945.8	ENSG00000142945	KIF2C	2.42882	0.0345141	d7.ab..d7.c
								ENSG00000260912.1	ENSG00000260912		-1.15793	0.0477564	d1.a..d1.c										ENSG00000123091.4	ENSG00000123091	RNF11	-1.93417	0.0476973	d5.ab..d5.c				ENSG00000142089.11	ENSG00000142089	IFITM3	1.0503	0.0345633	d7.ab..d7.c
								ENSG00000148450.8	ENSG00000148450	MSRB2	3.40764	0.0480407	d1.a..d1.c										ENSG00000105514.3	ENSG00000105514	RAB3D	-1.44243	0.0478526	d5.ab..d5.c				ENSG00000224712.6	ENSG00000224712	NPIPA3	-2.49447	0.0351582	d7.ab..d7.c
								ENSG00000253816.2	ENSG00000253816		-1.88578	0.0480852	d1.a..d1.c										ENSG00000085449.10	ENSG00000085449	WDFY1	-1.24574	0.0478569	d5.ab..d5.c				ENSG00000005108.11	ENSG00000005108	THSD7A	-2.29754	0.0352938	d7.ab..d7.c
								ENSG00000163378.9	ENSG00000163378	EOGT	4.53249	0.048217	d1.a..d1.c										ENSG00000101350.6	ENSG00000101350	KIF3B	-0.917912	0.0481151	d5.ab..d5.c				ENSG00000065882.11	ENSG00000065882	TBC1D1	1.9365	0.0353591	d7.ab..d7.c
								ENSG00000112280.11	ENSG00000112280	COL9A1	5.92201	0.0485098	d1.a..d1.c										ENSG00000137285.9	ENSG00000137285	TUBB2B	-0.753999	0.0482997	d5.ab..d5.c				ENSG00000261586.2	ENSG00000261586		-2.13343	0.0355321	d7.ab..d7.c
								ENSG00000126804.9	ENSG00000126804	ZBTB1	2.21662	0.0486103	d1.a..d1.c										ENSG00000155816.15	ENSG00000155816	FMN2	-2.29478	0.0483511	d5.ab..d5.c				ENSG00000114115.5	ENSG00000114115	RBP1	-0.951837	0.0357195	d7.ab..d7.c
								ENSG00000102226.5	ENSG00000102226	USP11	-1.0256	0.0486454	d1.a..d1.c										ENSG00000100744.10	ENSG00000100744	GSKIP	-1.508	0.0483963	d5.ab..d5.c				ENSG00000132612.14	ENSG00000132612	VPS4A	1.44417	0.0360704	d7.ab..d7.c
								ENSG00000168356.7	ENSG00000168356	SCN11A	-3.50689	0.0487141	d1.a..d1.c										ENSG00000213885.3	ENSG00000213885	RPL13AP7	-1.47522	0.0487193	d5.ab..d5.c				ENSG00000224631.3	ENSG00000224631	RPS27AP16	-2.9868	0.0360858	d7.ab..d7.c
								ENSG00000165688.7	ENSG00000165688	PMPCA	-1.62111	0.0488045	d1.a..d1.c										ENSG00000184009.5	ENSG00000184009	ACTG1	-0.622869	0.048791	d5.ab..d5.c				ENSG00000214975.4	ENSG00000214975	PPIAP29	-1.9365	0.0361871	d7.ab..d7.c
								ENSG00000178999.8	ENSG00000178999	AURKB	2.01811	0.048937	d1.a..d1.c										ENSG00000114120.7	ENSG00000114120	SLC25A36	-1.01626	0.0488321	d5.ab..d5.c				ENSG00000263812.1	ENSG00000263812	LINC00908	-1.83803	0.0363102	d7.ab..d7.c
								ENSG00000185985.7	ENSG00000185985	SLITRK2	-2.38204	0.048983	d1.a..d1.c										ENSG00000154781.11	ENSG00000154781	CCDC174	-1.70469	0.0490088	d5.ab..d5.c				ENSG00000242267.2	ENSG00000242267	SKINT1L	-1.87085	0.0364294	d7.ab..d7.c
								ENSG00000215424.5	ENSG00000215424	MCM3AP-AS1	1.55494	0.0490657	d1.a..d1.c										ENSG00000130338.8	ENSG00000130338	TULP4	-0.753999	0.0491418	d5.ab..d5.c				ENSG00000223579.2	ENSG00000223579		-1.9365	0.0364844	d7.ab..d7.c
								ENSG00000162551.9	ENSG00000162551	ALPL	1.65419	0.0490989	d1.a..d1.c										ENSG00000183405.5	ENSG00000183405		-1.44243	0.0491727	d5.ab..d5.c				ENSG00000094804.5	ENSG00000094804	CDC6	2.29754	0.0365716	d7.ab..d7.c
								ENSG00000225764.1	ENSG00000225764	P3H2-AS1	-3.44072	0.0494292	d1.a..d1.c										ENSG00000165434.6	ENSG00000165434	PGM2L1	-0.983477	0.0492527	d5.ab..d5.c				ENSG00000114251.9	ENSG00000114251	WNT5A	1.18159	0.0367539	d7.ab..d7.c
								ENSG00000104936.13	ENSG00000104936	DMPK	-4.06931	0.0494935	d1.a..d1.c																			ENSG00000137309.15	ENSG00000137309	HMGA1	1.21441	0.0367963	d7.ab..d7.c
								ENSG00000134222.12	ENSG00000134222	PSRC1	5.525	0.0498707	d1.a..d1.c																			ENSG00000152154.6	ENSG00000152154	TMEM178A	-2.19907	0.0368482	d7.ab..d7.c
								ENSG00000141431.5	ENSG00000141431	ASXL3	1.0256	0.04995	d1.a..d1.c																			ENSG00000137285.9	ENSG00000137285	TUBB2B	-0.722083	0.0370688	d7.ab..d7.c
																																ENSG00000123505.10	ENSG00000123505	AMD1	1.47699	0.0372261	d7.ab..d7.c
																																ENSG00000018189.8	ENSG00000018189	RUFY3	-1.24723	0.0372964	d7.ab..d7.c
																																ENSG00000137509.6	ENSG00000137509	PRCP	1.24723	0.0374187	d7.ab..d7.c
																																ENSG00000134698.10	ENSG00000134698	AGO4	-1.67392	0.037456	d7.ab..d7.c
																																ENSG00000248268.1	ENSG00000248268		-2.85551	0.0377812	d7.ab..d7.c
																																ENSG00000184226.10	ENSG00000184226	PCDH9	-1.73956	0.0378967	d7.ab..d7.c
																																ENSG00000154639.14	ENSG00000154639	CXADR	-0.722083	0.0380072	d7.ab..d7.c
																																ENSG00000175985.8	ENSG00000175985	PLEKHD1	-1.57545	0.0382149	d7.ab..d7.c
																																ENSG00000224838.2	ENSG00000224838		-1.87085	0.0382855	d7.ab..d7.c
																																ENSG00000198382.4	ENSG00000198382	UVRAG	-2.16625	0.0384752	d7.ab..d7.c
																																ENSG00000127995.12	ENSG00000127995	CASD1	-1.6411	0.0385003	d7.ab..d7.c
																																ENSG00000186469.4	ENSG00000186469	GNG2	-1.83803	0.038536	d7.ab..d7.c
																																ENSG00000180758.10	ENSG00000180758	GPR157	3.41348	0.0385573	d7.ab..d7.c
																																ENSG00000234520.1	ENSG00000234520		-2.42882	0.0388903	d7.ab..d7.c
																																ENSG00000258225.1	ENSG00000258225		-1.57545	0.0390558	d7.ab..d7.c
																																ENSG00000234222.2	ENSG00000234222	LIX1L-AS1	-2.36318	0.0393222	d7.ab..d7.c
																																ENSG00000115310.13	ENSG00000115310	RTN4	-0.787727	0.0394936	d7.ab..d7.c
																																ENSG00000147180.12	ENSG00000147180	ZNF711	-1.18159	0.039565	d7.ab..d7.c
																																ENSG00000176788.7	ENSG00000176788	BASP1	-1.60828	0.0397852	d7.ab..d7.c
																																ENSG00000228532.2	ENSG00000228532		-1.73956	0.0400882	d7.ab..d7.c
																																ENSG00000100393.9	ENSG00000100393	EP300	-1.18159	0.0401288	d7.ab..d7.c
																																ENSG00000186522.10	ENSG00000186522	SEPT10	1.73956	0.0401319	d7.ab..d7.c
																																ENSG00000123240.12	ENSG00000123240	OPTN	-2.03496	0.0402038	d7.ab..d7.c
																																ENSG00000003987.9	ENSG00000003987	MTMR7	-2.10061	0.040211	d7.ab..d7.c
																																ENSG00000112029.5	ENSG00000112029	FBXO5	1.67392	0.0402834	d7.ab..d7.c
																																ENSG00000166341.6	ENSG00000166341	DCHS1	-1.73956	0.0403478	d7.ab..d7.c
																																ENSG00000112182.10	ENSG00000112182	BACH2	-2.19907	0.0403547	d7.ab..d7.c
																																ENSG00000101290.9	ENSG00000101290	CDS2	-0.886193	0.0403589	d7.ab..d7.c
																																ENSG00000250771.2	ENSG00000250771		-1.57545	0.0404112	d7.ab..d7.c
																																ENSG00000203325.3	ENSG00000203325		-2.92115	0.040477	d7.ab..d7.c
																																ENSG00000176771.11	ENSG00000176771	NCKAP5	-2.03496	0.040487	d7.ab..d7.c
																																ENSG00000068489.8	ENSG00000068489	PRR11	1.41134	0.0405478	d7.ab..d7.c
																																ENSG00000205593.7	ENSG00000205593	DENND6B	-2.59293	0.0405721	d7.ab..d7.c
																																ENSG00000138160.4	ENSG00000138160	KIF11	1.60828	0.0405785	d7.ab..d7.c
																																ENSG00000235016.1	ENSG00000235016	SEMA3F-AS1	-1.73956	0.0411385	d7.ab..d7.c
																																ENSG00000144063.3	ENSG00000144063	MALL	-2.88833	0.0412208	d7.ab..d7.c
																																ENSG00000147570.5	ENSG00000147570	DNAJC5B	-3.24937	0.0412588	d7.ab..d7.c
																																ENSG00000149136.3	ENSG00000149136	SSRP1	0.919015	0.04129	d7.ab..d7.c
																																ENSG00000180190.7	ENSG00000180190	TDRP	-2.52729	0.0413024	d7.ab..d7.c
																																ENSG00000233837.1	ENSG00000233837	EIF3LP2	-1.57545	0.0415339	d7.ab..d7.c
																																ENSG00000183960.4	ENSG00000183960	KCNH8	-1.87085	0.0415419	d7.ab..d7.c
																																ENSG00000115738.5	ENSG00000115738	ID2	0.722083	0.0416014	d7.ab..d7.c
																																ENSG00000140365.11	ENSG00000140365	COMMD4	2.23189	0.0416231	d7.ab..d7.c
																																ENSG00000179454.9	ENSG00000179454	KLHL28	-0.951837	0.0416392	d7.ab..d7.c
																																ENSG00000214087.4	ENSG00000214087	ARL16	1.90367	0.0418137	d7.ab..d7.c
																																ENSG00000135862.5	ENSG00000135862	LAMC1	2.62576	0.0418429	d7.ab..d7.c
																																ENSG00000169062.10	ENSG00000169062	UPF3A	-1.47699	0.0418641	d7.ab..d7.c
																																ENSG00000237484.5	ENSG00000237484	LINC01684	-1.77239	0.0419914	d7.ab..d7.c
																																ENSG00000141101.8	ENSG00000141101	NOB1	2.03496	0.0419938	d7.ab..d7.c
																																ENSG00000222014.4	ENSG00000222014	RAB6C	-2.88833	0.042081	d7.ab..d7.c
																																ENSG00000004866.14	ENSG00000004866	ST7	-2.33036	0.042097	d7.ab..d7.c
																																ENSG00000244754.4	ENSG00000244754	N4BP2L2	-0.689261	0.0423009	d7.ab..d7.c
																																ENSG00000172058.11	ENSG00000172058	SERF1A	-1.83803	0.0423065	d7.ab..d7.c
																																ENSG00000131236.12	ENSG00000131236	CAP1	-0.722083	0.0423647	d7.ab..d7.c
																																ENSG00000166974.8	ENSG00000166974	MAPRE2	-1.44417	0.0423984	d7.ab..d7.c
																																ENSG00000155085.11	ENSG00000155085	AK9	-1.54263	0.0424093	d7.ab..d7.c
																																ENSG00000090889.10	ENSG00000090889	KIF4A	1.31288	0.042467	d7.ab..d7.c
																																ENSG00000184144.5	ENSG00000184144	CNTN2	-3.54477	0.0426022	d7.ab..d7.c
																																ENSG00000123353.5	ENSG00000123353	ORMDL2	-1.90367	0.0426918	d7.ab..d7.c
																																ENSG00000004534.10	ENSG00000004534	RBM6	-0.820549	0.0427284	d7.ab..d7.c
																																ENSG00000249409.1	ENSG00000249409		-2.19907	0.0430023	d7.ab..d7.c
																																ENSG00000161791.9	ENSG00000161791	FMNL3	2.46165	0.0430125	d7.ab..d7.c
																																ENSG00000115504.10	ENSG00000115504	EHBP1	-1.70674	0.0431829	d7.ab..d7.c
																																ENSG00000174963.13	ENSG00000174963	ZIC4	2.23189	0.0433279	d7.ab..d7.c
																																ENSG00000179833.4	ENSG00000179833	SERTAD2	-2.10061	0.0433314	d7.ab..d7.c
																																ENSG00000212994.4	ENSG00000212994	RPS26P6	-2.13343	0.043357	d7.ab..d7.c
																																ENSG00000077157.16	ENSG00000077157	PPP1R12B	-1.6411	0.0434714	d7.ab..d7.c
																																ENSG00000163617.6	ENSG00000163617	CCDC191	-2.10061	0.0437872	d7.ab..d7.c
																																ENSG00000156976.10	ENSG00000156976	EIF4A2	-0.754905	0.0438523	d7.ab..d7.c
																																ENSG00000117569.14	ENSG00000117569	PTBP2	-0.525151	0.0439683	d7.ab..d7.c
																																ENSG00000253816.2	ENSG00000253816		-2.23189	0.0443907	d7.ab..d7.c
																																ENSG00000212961.4	ENSG00000212961	HNRNPA1P40	-1.50981	0.0444183	d7.ab..d7.c
																																ENSG00000198901.9	ENSG00000198901	PRC1	1.18159	0.0444746	d7.ab..d7.c
																																ENSG00000196656.6	ENSG00000196656		-1.67392	0.0446617	d7.ab..d7.c
																																ENSG00000196776.10	ENSG00000196776	CD47	1.08312	0.0447029	d7.ab..d7.c
																																ENSG00000136875.8	ENSG00000136875	PRPF4	1.9365	0.0449121	d7.ab..d7.c
																																ENSG00000215630.5	ENSG00000215630	GUSBP9	-1.83803	0.0449687	d7.ab..d7.c
																																ENSG00000233369.3	ENSG00000233369	GTF2IP4	-1.47699	0.0449943	d7.ab..d7.c
																																ENSG00000273274.1	ENSG00000273274	ZBTB8B	-1.60828	0.0451037	d7.ab..d7.c
																																ENSG00000185298.8	ENSG00000185298	CCDC137	4.13557	0.0452233	d7.ab..d7.c
																																ENSG00000099246.12	ENSG00000099246	RAB18	-0.853371	0.0452501	d7.ab..d7.c
																																ENSG00000186480.8	ENSG00000186480	INSIG1	2.92115	0.0455043	d7.ab..d7.c
																																ENSG00000170381.8	ENSG00000170381	SEMA3E	-1.57545	0.045656	d7.ab..d7.c
																																ENSG00000255537.1	ENSG00000255537		-2.46165	0.0458422	d7.ab..d7.c
																																ENSG00000239246.2	ENSG00000239246		-1.9365	0.045927	d7.ab..d7.c
																																ENSG00000099250.13	ENSG00000099250	NRP1	-3.24937	0.0459803	d7.ab..d7.c
																																ENSG00000183337.12	ENSG00000183337	BCOR	-1.73956	0.0460024	d7.ab..d7.c
																																ENSG00000269633.1	ENSG00000269633		-2.33036	0.0460353	d7.ab..d7.c
																																ENSG00000149308.12	ENSG00000149308	NPAT	1.50981	0.0460405	d7.ab..d7.c
																																ENSG00000069974.11	ENSG00000069974	RAB27A	-2.26471	0.0461305	d7.ab..d7.c
																																ENSG00000148541.8	ENSG00000148541	FAM13C	-2.396	0.0462782	d7.ab..d7.c
																																ENSG00000116473.10	ENSG00000116473	RAP1A	-2.52729	0.0462997	d7.ab..d7.c
																																ENSG00000081479.8	ENSG00000081479	LRP2	1.14877	0.0465475	d7.ab..d7.c
																																ENSG00000272379.1	ENSG00000272379		-1.50981	0.0468167	d7.ab..d7.c
																																ENSG00000121446.13	ENSG00000121446	RGSL1	-2.42882	0.0468287	d7.ab..d7.c
																																ENSG00000126001.11	ENSG00000126001	CEP250	2.65858	0.0470403	d7.ab..d7.c
																																ENSG00000109805.5	ENSG00000109805	NCAPG	1.50981	0.0472193	d7.ab..d7.c
																																ENSG00000078142.7	ENSG00000078142	PIK3C3	-1.41134	0.0472534	d7.ab..d7.c
																																ENSG00000144445.11	ENSG00000144445	KANSL1L	-1.70674	0.0472971	d7.ab..d7.c
																																ENSG00000182902.9	ENSG00000182902	SLC25A18	-2.396	0.0473201	d7.ab..d7.c
																																ENSG00000189350.8	ENSG00000189350	TOGARAM2	-2.396	0.0475225	d7.ab..d7.c
																																ENSG00000184117.7	ENSG00000184117	NIPSNAP1	-1.14877	0.0475364	d7.ab..d7.c
																																ENSG00000007968.6	ENSG00000007968	E2F2	2.62576	0.0481896	d7.ab..d7.c
																																ENSG00000204241.3	ENSG00000204241		-2.75704	0.0482118	d7.ab..d7.c
																																ENSG00000054282.11	ENSG00000054282	SDCCAG8	-1.54263	0.0482183	d7.ab..d7.c
																																ENSG00000137860.7	ENSG00000137860	SLC28A2	-2.52729	0.0482793	d7.ab..d7.c
																																ENSG00000093072.11	ENSG00000093072	ADA2	-1.6411	0.0482818	d7.ab..d7.c
																																ENSG00000166557.8	ENSG00000166557	TMED3	1.50981	0.0483189	d7.ab..d7.c
																																ENSG00000129534.9	ENSG00000129534	MIS18BP1	1.3457	0.0483608	d7.ab..d7.c
																																ENSG00000117318.8	ENSG00000117318	ID3	1.08312	0.0484879	d7.ab..d7.c
																																ENSG00000198356.7	ENSG00000198356	ASNA1	2.42882	0.0487194	d7.ab..d7.c
																																ENSG00000135341.13	ENSG00000135341	MAP3K7	1.3457	0.0489013	d7.ab..d7.c
																																ENSG00000197013.5	ENSG00000197013	ZNF429	-1.57545	0.048919	d7.ab..d7.c
																																ENSG00000182307.8	ENSG00000182307	C8orf33	1.31288	0.0490796	d7.ab..d7.c
																																ENSG00000148773.8	ENSG00000148773	MKI67	0.722083	0.0491403	d7.ab..d7.c
																																ENSG00000178464.6	ENSG00000178464	RPL10P16	-1.44417	0.0491454	d7.ab..d7.c
																																ENSG00000104368.13	ENSG00000104368	PLAT	-2.16625	0.0491961	d7.ab..d7.c
																																ENSG00000089685.10	ENSG00000089685	BIRC5	0.919015	0.0492656	d7.ab..d7.c
																																ENSG00000112742.5	ENSG00000112742	TTK	1.57545	0.0496093	d7.ab..d7.c
																																ENSG00000151846.7	ENSG00000151846	PABPC3	-1.90367	0.0497734	d7.ab..d7.c
																																ENSG00000156735.6	ENSG00000156735	BAG4	0.787727	0.0498961	d7.ab..d7.c
																																ENSG00000123201.10	ENSG00000123201	GUCY1B2	-2.92115	0.0499316	d7.ab..d7.c
[truncated: 6 more columns]

## Sheet: Table_S6
58 common in "day 0" and "day 1"				129 common in "day 5" and "day 1"				135 common in "day 5" and "day 7"				128 common in "day 10" and "day 7"				48 common in "day 10" and "day 30"
gencode_id	ensembl_gene_id	hgnc_symbol		gencode_id	ensembl_gene_id	hgnc_symbol		gencode_id	ensembl_gene_id	hgnc_symbol		gencode_id	ensembl_gene_id	hgnc_symbol		gencode_id	ensembl_gene_id	hgnc_symbol
ENSG00000007372.16	ENSG00000007372	PAX6		ENSG00000007372.16	ENSG00000007372	PAX6		ENSG00000004866.14	ENSG00000004866	ST7		ENSG00000077279.12	ENSG00000077279	DCX		ENSG00000028277.16	ENSG00000028277	POU2F2
ENSG00000037965.4	ENSG00000037965	HOXC8		ENSG00000054965.6	ENSG00000054965	FAM168A		ENSG00000018189.8	ENSG00000018189	RUFY3		ENSG00000104435.9	ENSG00000104435	STMN2		ENSG00000077279.12	ENSG00000077279	DCX
ENSG00000043355.6	ENSG00000043355	ZIC2		ENSG00000064300.4	ENSG00000064300	NGFR		ENSG00000053108.12	ENSG00000053108	FSTL4		ENSG00000162374.12	ENSG00000162374	ELAVL4		ENSG00000078018.15	ENSG00000078018	MAP2
ENSG00000096696.9	ENSG00000096696	DSP		ENSG00000064651.9	ENSG00000064651	SLC12A2		ENSG00000055917.11	ENSG00000055917	PUM2		ENSG00000213190.2	ENSG00000213190	MLLT11		ENSG00000084093.11	ENSG00000084093	REST
ENSG00000100321.10	ENSG00000100321	SYNGR1		ENSG00000070214.11	ENSG00000070214	SLC44A1		ENSG00000064300.4	ENSG00000064300	NGFR		ENSG00000225783.2	ENSG00000225783	MIAT		ENSG00000100592.11	ENSG00000100592	DAAM1
ENSG00000103449.7	ENSG00000103449	SALL1		ENSG00000072041.12	ENSG00000072041	SLC6A15		ENSG00000067715.9	ENSG00000067715	SYT1		ENSG00000253230.2	ENSG00000253230	LINC00599		ENSG00000101489.14	ENSG00000101489	CELF4
ENSG00000104490.13	ENSG00000104490	NCALD		ENSG00000075340.18	ENSG00000075340	ADD2		ENSG00000072832.10	ENSG00000072832	CRMP1		ENSG00000124766.4	ENSG00000124766	SOX4		ENSG00000104381.8	ENSG00000104381	GDAP1
ENSG00000105997.18	ENSG00000105997	HOXA3		ENSG00000077279.12	ENSG00000077279	DCX		ENSG00000075340.18	ENSG00000075340	ADD2		ENSG00000139289.9	ENSG00000139289	PHLDA1		ENSG00000104435.9	ENSG00000104435	STMN2
ENSG00000110042.3	ENSG00000110042	DTX4		ENSG00000078018.15	ENSG00000078018	MAP2		ENSG00000077279.12	ENSG00000077279	DCX		ENSG00000196361.5	ENSG00000196361	ELAVL3		ENSG00000104725.9	ENSG00000104725
ENSG00000113140.6	ENSG00000113140	SPARC		ENSG00000078399.11	ENSG00000078399	HOXA9		ENSG00000078018.15	ENSG00000078018	MAP2		ENSG00000171533.7	ENSG00000171533	MAP6		ENSG00000109472.9	ENSG00000109472	CPE
ENSG00000113361.8	ENSG00000113361	CDH6		ENSG00000078699.17	ENSG00000078699	CBFA2T2		ENSG00000079102.12	ENSG00000079102	RUNX1T1		ENSG00000187134.8	ENSG00000187134	AKR1C1		ENSG00000110987.4	ENSG00000110987	BCL7A
ENSG00000114251.9	ENSG00000114251	WNT5A		ENSG00000079459.8	ENSG00000079459	FDFT1		ENSG00000089685.10	ENSG00000089685	BIRC5		ENSG00000078018.15	ENSG00000078018	MAP2		ENSG00000114115.5	ENSG00000114115	RBP1
ENSG00000114529.8	ENSG00000114529	C3orf52		ENSG00000084444.9	ENSG00000084444	FAM234B		ENSG00000089737.11	ENSG00000089737	DDX24		ENSG00000146263.7	ENSG00000146263	MMS22L		ENSG00000114796.11	ENSG00000114796	KLHL24
ENSG00000117632.16	ENSG00000117632	STMN1		ENSG00000089685.10	ENSG00000089685	BIRC5		ENSG00000091542.8	ENSG00000091542	ALKBH5		ENSG00000177551.5	ENSG00000177551	NHLH2		ENSG00000115310.13	ENSG00000115310	RTN4
ENSG00000118257.12	ENSG00000118257	NRP2		ENSG00000090932.6	ENSG00000090932	DLL3		ENSG00000092421.12	ENSG00000092421	SEMA6A		ENSG00000147488.7	ENSG00000147488	ST18		ENSG00000115963.9	ENSG00000115963	RND3
ENSG00000118971.3	ENSG00000118971	CCND2		ENSG00000091527.11	ENSG00000091527	CDV3		ENSG00000099624.3	ENSG00000099624	ATP5D		ENSG00000174136.7	ENSG00000174136	RGMB		ENSG00000117139.12	ENSG00000117139	KDM5B
ENSG00000120708.12	ENSG00000120708	TGFBI		ENSG00000091732.11	ENSG00000091732	ZC3HC1		ENSG00000100320.18	ENSG00000100320	RBFOX2		ENSG00000151320.6	ENSG00000151320	AKAP6		ENSG00000119547.5	ENSG00000119547	ONECUT2
ENSG00000121570.8	ENSG00000121570	DPPA4		ENSG00000091972.14	ENSG00000091972	CD200		ENSG00000100592.11	ENSG00000100592	DAAM1		ENSG00000110042.3	ENSG00000110042	DTX4		ENSG00000124766.4	ENSG00000124766	SOX4
ENSG00000125430.4	ENSG00000125430	HS3ST3B1		ENSG00000092847.6	ENSG00000092847	AGO1		ENSG00000104112.4	ENSG00000104112	SCG3		ENSG00000164330.12	ENSG00000164330	EBF1		ENSG00000129757.8	ENSG00000129757	CDKN1C
ENSG00000128652.7	ENSG00000128652	HOXD3		ENSG00000100647.7	ENSG00000100647	SUSD6		ENSG00000104435.9	ENSG00000104435	STMN2		ENSG00000167654.13	ENSG00000167654	ATCAY		ENSG00000133958.9	ENSG00000133958	UNC79
ENSG00000130066.12	ENSG00000130066	SAT1		ENSG00000101236.12	ENSG00000101236	RNF24		ENSG00000104722.9	ENSG00000104722	NEFM		ENSG00000155980.7	ENSG00000155980	KIF5A		ENSG00000134313.10	ENSG00000134313	KIDINS220
ENSG00000139116.13	ENSG00000139116	KIF21A		ENSG00000103187.6	ENSG00000103187	COTL1		ENSG00000104725.9	ENSG00000104725			ENSG00000176887.5	ENSG00000176887	SOX11		ENSG00000134982.12	ENSG00000134982	APC
ENSG00000139318.7	ENSG00000139318	DUSP6		ENSG00000104112.4	ENSG00000104112	SCG3		ENSG00000105426.10	ENSG00000105426	PTPRS		ENSG00000169855.15	ENSG00000169855	ROBO1		ENSG00000137343.13	ENSG00000137343	ATAT1
ENSG00000139364.6	ENSG00000139364	TMEM132B		ENSG00000104490.13	ENSG00000104490	NCALD		ENSG00000106648.9	ENSG00000106648	GALNTL5		ENSG00000107105.10	ENSG00000107105	ELAVL2		ENSG00000139289.9	ENSG00000139289	PHLDA1
ENSG00000139800.8	ENSG00000139800	ZIC5		ENSG00000104725.9	ENSG00000104725			ENSG00000107105.10	ENSG00000107105	ELAVL2		ENSG00000129757.8	ENSG00000129757	CDKN1C		ENSG00000139910.15	ENSG00000139910	NOVA1
ENSG00000143995.15	ENSG00000143995	MEIS1		ENSG00000107105.10	ENSG00000107105	ELAVL2		ENSG00000108001.9	ENSG00000108001	EBF3		ENSG00000139767.4	ENSG00000139767	SRRM4		ENSG00000144369.8	ENSG00000144369	FAM171B
ENSG00000144749.9	ENSG00000144749	LRIG1		ENSG00000108379.5	ENSG00000108379	WNT3		ENSG00000108828.11	ENSG00000108828	VAT1		ENSG00000139910.15	ENSG00000139910	NOVA1		ENSG00000144834.8	ENSG00000144834	TAGLN3
ENSG00000145147.15	ENSG00000145147	SLIT2		ENSG00000108654.7	ENSG00000108654	DDX5		ENSG00000109991.4	ENSG00000109991	P2RX3		ENSG00000144834.8	ENSG00000144834	TAGLN3		ENSG00000145362.12	ENSG00000145362	ANK2
ENSG00000145423.4	ENSG00000145423	SFRP2		ENSG00000109046.10	ENSG00000109046	WSB1		ENSG00000110042.3	ENSG00000110042	DTX4		ENSG00000198668.6	ENSG00000198668	CALM1		ENSG00000145375.7	ENSG00000145375	SPATA5
ENSG00000148200.12	ENSG00000148200	NR6A1		ENSG00000110042.3	ENSG00000110042	DTX4		ENSG00000111218.7	ENSG00000111218	PRMT8		ENSG00000163618.13	ENSG00000163618	CADPS		ENSG00000147488.7	ENSG00000147488	ST18
ENSG00000150275.13	ENSG00000150275	PCDH15		ENSG00000111218.7	ENSG00000111218	PRMT8		ENSG00000113657.8	ENSG00000113657	DPYSL3		ENSG00000111218.7	ENSG00000111218	PRMT8		ENSG00000148798.5	ENSG00000148798	INA
ENSG00000152268.8	ENSG00000152268			ENSG00000113657.8	ENSG00000113657	DPYSL3		ENSG00000114115.5	ENSG00000114115	RBP1		ENSG00000145362.12	ENSG00000145362	ANK2		ENSG00000149294.12	ENSG00000149294	NCAM1
ENSG00000157542.8	ENSG00000157542	KCNJ6		ENSG00000114805.12	ENSG00000114805	PLCH1		ENSG00000114978.13	ENSG00000114978	MOB1A		ENSG00000166426.7	ENSG00000166426	CRABP1		ENSG00000151150.16	ENSG00000151150	ANK3
ENSG00000163191.5	ENSG00000163191	S100A11		ENSG00000115738.5	ENSG00000115738	ID2		ENSG00000115310.13	ENSG00000115310	RTN4		ENSG00000100592.11	ENSG00000100592	DAAM1		ENSG00000154639.14	ENSG00000154639	CXADR
ENSG00000165443.7	ENSG00000165443	PHYHIPL		ENSG00000116667.8	ENSG00000116667	C1orf21		ENSG00000115355.11	ENSG00000115355	CCDC88A		ENSG00000119547.5	ENSG00000119547	ONECUT2		ENSG00000155980.7	ENSG00000155980	KIF5A
ENSG00000165556.9	ENSG00000165556	CDX2		ENSG00000117632.16	ENSG00000117632	STMN1		ENSG00000115738.5	ENSG00000115738	ID2		ENSG00000149294.12	ENSG00000149294	NCAM1		ENSG00000162374.12	ENSG00000162374	ELAVL4
ENSG00000166426.7	ENSG00000166426	CRABP1		ENSG00000117707.11	ENSG00000117707	PROX1		ENSG00000117569.14	ENSG00000117569	PTBP2		ENSG00000005108.11	ENSG00000005108	THSD7A		ENSG00000163618.13	ENSG00000163618	CADPS
ENSG00000166450.8	ENSG00000166450	PRTG		ENSG00000117724.8	ENSG00000117724	CENPF		ENSG00000117632.16	ENSG00000117632	STMN1		ENSG00000111052.3	ENSG00000111052	LIN7A		ENSG00000166426.7	ENSG00000166426	CRABP1
ENSG00000166710.13	ENSG00000166710	B2M		ENSG00000118971.3	ENSG00000118971	CCND2		ENSG00000117724.8	ENSG00000117724	CENPF		ENSG00000126001.11	ENSG00000126001	CEP250		ENSG00000166963.8	ENSG00000166963	MAP1A
ENSG00000171843.11	ENSG00000171843	MLLT3		ENSG00000119547.5	ENSG00000119547	ONECUT2		ENSG00000118263.10	ENSG00000118263	KLF7		ENSG00000140365.11	ENSG00000140365	COMMD4		ENSG00000167654.13	ENSG00000167654	ATCAY
ENSG00000174469.13	ENSG00000174469	CNTNAP2		ENSG00000120162.9	ENSG00000120162	MOB3B		ENSG00000119547.5	ENSG00000119547	ONECUT2		ENSG00000123240.12	ENSG00000123240	OPTN		ENSG00000170802.11	ENSG00000170802	FOXN2
ENSG00000180592.12	ENSG00000180592	SKIDA1		ENSG00000122644.8	ENSG00000122644	ARL4A		ENSG00000121989.10	ENSG00000121989	ACVR2A		ENSG00000144369.8	ENSG00000144369	FAM171B		ENSG00000174136.7	ENSG00000174136	RGMB
ENSG00000180806.4	ENSG00000180806	HOXC9		ENSG00000123091.4	ENSG00000123091	RNF11		ENSG00000123307.3	ENSG00000123307	NEUROD4		ENSG00000187323.7	ENSG00000187323	DCC		ENSG00000176887.5	ENSG00000176887	SOX11
ENSG00000180818.4	ENSG00000180818	HOXC10		ENSG00000123213.18	ENSG00000123213	NLN		ENSG00000124766.4	ENSG00000124766	SOX4		ENSG00000162458.8	ENSG00000162458	FBLIM1		ENSG00000184144.5	ENSG00000184144	CNTN2
ENSG00000182667.10	ENSG00000182667	NTM		ENSG00000123307.3	ENSG00000123307	NEUROD4		ENSG00000128641.13	ENSG00000128641	MYO1B		ENSG00000213260.3	ENSG00000213260	YWHAZP5		ENSG00000187323.7	ENSG00000187323	DCC
ENSG00000184009.5	ENSG00000184009	ACTG1		ENSG00000123560.9	ENSG00000123560	PLP1		ENSG00000129757.8	ENSG00000129757	CDKN1C		ENSG00000260230.2	ENSG00000260230	FRRS1L		ENSG00000198727.2	ENSG00000198727	MT-CYB
ENSG00000184349.8	ENSG00000184349	EFNA5		ENSG00000124766.4	ENSG00000124766	SOX4		ENSG00000131037.10	ENSG00000131037	EPS8L1		ENSG00000108001.9	ENSG00000108001	EBF3		ENSG00000213190.2	ENSG00000213190	MLLT11
ENSG00000185885.11	ENSG00000185885	IFITM1		ENSG00000125430.4	ENSG00000125430	HS3ST3B1		ENSG00000131149.13	ENSG00000131149	GSE1		ENSG00000092421.12	ENSG00000092421	SEMA6A		ENSG00000225783.2	ENSG00000225783	MIAT
ENSG00000187955.7	ENSG00000187955	COL14A1		ENSG00000128652.7	ENSG00000128652	HOXD3		ENSG00000132639.8	ENSG00000132639	SNAP25		ENSG00000168280.12	ENSG00000168280	KIF5C
ENSG00000198075.5	ENSG00000198075	SULT1C4		ENSG00000129315.5	ENSG00000129315	CCNT1		ENSG00000132780.12	ENSG00000132780	NASP		ENSG00000188375.3	ENSG00000188375	H3F3C
ENSG00000205542.6	ENSG00000205542	TMSB4X		ENSG00000129757.8	ENSG00000129757	CDKN1C		ENSG00000132872.7	ENSG00000132872	SYT4		ENSG00000250472.1	ENSG00000250472	TRIM36-IT1
ENSG00000206579.7	ENSG00000206579	XKR4		ENSG00000131149.13	ENSG00000131149	GSE1		ENSG00000134313.10	ENSG00000134313	KIDINS220		ENSG00000204794.6	ENSG00000204794
ENSG00000213965.3	ENSG00000213965	NUDT19		ENSG00000132463.9	ENSG00000132463	GRSF1		ENSG00000134986.9	ENSG00000134986	NREP		ENSG00000171786.5	ENSG00000171786	NHLH1
ENSG00000233101.6	ENSG00000233101	HOXB-AS3		ENSG00000134986.9	ENSG00000134986	NREP		ENSG00000135862.5	ENSG00000135862	LAMC1		ENSG00000115310.13	ENSG00000115310	RTN4
ENSG00000235609.4	ENSG00000235609			ENSG00000135540.7	ENSG00000135540	NHSL1		ENSG00000137285.9	ENSG00000137285	TUBB2B		ENSG00000254275.2	ENSG00000254275	LINC00824
ENSG00000242808.3	ENSG00000242808	SOX2-OT		ENSG00000136160.10	ENSG00000136160	EDNRB		ENSG00000137860.7	ENSG00000137860	SLC28A2		ENSG00000134757.4	ENSG00000134757	DSG3
ENSG00000250742.1	ENSG00000250742	LINC02381		ENSG00000136267.9	ENSG00000136267	DGKB		ENSG00000138658.11	ENSG00000138658	ZGRF1		ENSG00000138670.12	ENSG00000138670	RASGEF1B
ENSG00000256463.4	ENSG00000256463	SALL3		ENSG00000137343.13	ENSG00000137343	ATAT1		ENSG00000138670.12	ENSG00000138670	RASGEF1B		ENSG00000187672.8	ENSG00000187672	ERC2
				ENSG00000137872.11	ENSG00000137872	SEMA6D		ENSG00000139289.9	ENSG00000139289	PHLDA1		ENSG00000212961.4	ENSG00000212961	HNRNPA1P40
				ENSG00000138670.12	ENSG00000138670	RASGEF1B		ENSG00000139618.10	ENSG00000139618	BRCA2		ENSG00000133958.9	ENSG00000133958	UNC79
				ENSG00000138814.12	ENSG00000138814	PPP3CA		ENSG00000139767.4	ENSG00000139767	SRRM4		ENSG00000134313.10	ENSG00000134313	KIDINS220
				ENSG00000139289.9	ENSG00000139289	PHLDA1		ENSG00000139910.15	ENSG00000139910	NOVA1		ENSG00000184144.5	ENSG00000184144	CNTN2
				ENSG00000139767.4	ENSG00000139767	SRRM4		ENSG00000139970.12	ENSG00000139970	RTN1		ENSG00000217624.2	ENSG00000217624
				ENSG00000141431.5	ENSG00000141431	ASXL3		ENSG00000141431.5	ENSG00000141431	ASXL3		ENSG00000249736.1	ENSG00000249736	LINC02242
				ENSG00000141449.10	ENSG00000141449	GREB1L		ENSG00000142230.7	ENSG00000142230	SAE1		ENSG00000100167.15	ENSG00000100167	SEPT3
				ENSG00000142669.9	ENSG00000142669	SH3BGRL3		ENSG00000143702.11	ENSG00000143702	CEP170		ENSG00000121989.10	ENSG00000121989	ACVR2A
				ENSG00000143333.6	ENSG00000143333	RGS16		ENSG00000144369.8	ENSG00000144369	FAM171B		ENSG00000175985.8	ENSG00000175985	PLEKHD1
				ENSG00000144485.6	ENSG00000144485	HES6		ENSG00000144485.6	ENSG00000144485	HES6		ENSG00000197182.8	ENSG00000197182	MIRLET7BHG
				ENSG00000144834.8	ENSG00000144834	TAGLN3		ENSG00000144834.8	ENSG00000144834	TAGLN3		ENSG00000151150.16	ENSG00000151150	ANK3
				ENSG00000145362.12	ENSG00000145362	ANK2		ENSG00000145362.12	ENSG00000145362	ANK2		ENSG00000119969.10	ENSG00000119969	HELLS
				ENSG00000145423.4	ENSG00000145423	SFRP2		ENSG00000147488.7	ENSG00000147488	ST18		ENSG00000065328.12	ENSG00000065328	MCM10
				ENSG00000146197.7	ENSG00000146197	SCUBE3		ENSG00000149294.12	ENSG00000149294	NCAM1		ENSG00000003987.9	ENSG00000003987	MTMR7
				ENSG00000147459.13	ENSG00000147459	DOCK5		ENSG00000151150.16	ENSG00000151150	ANK3		ENSG00000065609.10	ENSG00000065609	SNAP91
				ENSG00000148053.11	ENSG00000148053	NTRK2		ENSG00000151914.13	ENSG00000151914	DST		ENSG00000104725.9	ENSG00000104725
				ENSG00000148516.17	ENSG00000148516	ZEB1		ENSG00000152503.5	ENSG00000152503	TRIM36		ENSG00000163531.11	ENSG00000163531	NFASC
				ENSG00000149948.9	ENSG00000149948	HMGA2		ENSG00000154639.14	ENSG00000154639	CXADR		ENSG00000176641.6	ENSG00000176641	RNF152
				ENSG00000150347.10	ENSG00000150347	ARID5B		ENSG00000154803.8	ENSG00000154803	FLCN		ENSG00000114796.11	ENSG00000114796	KLHL24
				ENSG00000150764.9	ENSG00000150764	DIXDC1		ENSG00000155158.16	ENSG00000155158	TTC39B		ENSG00000259752.1	ENSG00000259752
				ENSG00000151746.9	ENSG00000151746	BICD1		ENSG00000155849.11	ENSG00000155849	ELMO1		ENSG00000094916.9	ENSG00000094916	CBX5
				ENSG00000151914.13	ENSG00000151914	DST		ENSG00000155980.7	ENSG00000155980	KIF5A		ENSG00000113140.6	ENSG00000113140	SPARC
				ENSG00000152268.8	ENSG00000152268			ENSG00000156374.10	ENSG00000156374	PCGF6		ENSG00000144724.14	ENSG00000144724	PTPRG
				ENSG00000152503.5	ENSG00000152503	TRIM36		ENSG00000157827.15	ENSG00000157827	FMNL2		ENSG00000203325.3	ENSG00000203325
				ENSG00000152684.10	ENSG00000152684	PELO		ENSG00000160145.11	ENSG00000160145	KALRN		ENSG00000213885.3	ENSG00000213885	RPL13AP7
				ENSG00000154721.10	ENSG00000154721	JAM2		ENSG00000162188.5	ENSG00000162188	GNG3		ENSG00000258225.1	ENSG00000258225
				ENSG00000154928.12	ENSG00000154928	EPHB1		ENSG00000162374.12	ENSG00000162374	ELAVL4		ENSG00000104722.9	ENSG00000104722	NEFM
				ENSG00000155980.7	ENSG00000155980	KIF5A		ENSG00000163531.11	ENSG00000163531	NFASC		ENSG00000134533.2	ENSG00000134533	RERG
				ENSG00000157827.15	ENSG00000157827	FMNL2		ENSG00000163539.11	ENSG00000163539	CLASP2		ENSG00000232406.2	ENSG00000232406
				ENSG00000160097.11	ENSG00000160097	FNDC5		ENSG00000163618.13	ENSG00000163618	CADPS		ENSG00000237484.5	ENSG00000237484	LINC01684
				ENSG00000160991.11	ENSG00000160991	ORAI2		ENSG00000164330.12	ENSG00000164330	EBF1		ENSG00000264423.1	ENSG00000264423	RN7SL718P
				ENSG00000162374.12	ENSG00000162374	ELAVL4		ENSG00000164796.13	ENSG00000164796	CSMD3		ENSG00000147036.7	ENSG00000147036	LANCL3
				ENSG00000163618.13	ENSG00000163618	CADPS		ENSG00000165029.11	ENSG00000165029	ABCA1		ENSG00000064042.13	ENSG00000064042	LIMCH1
				ENSG00000163644.10	ENSG00000163644	PPM1K		ENSG00000165434.6	ENSG00000165434	PGM2L1		ENSG00000072786.8	ENSG00000072786	STK10
				ENSG00000164134.8	ENSG00000164134	NAA15		ENSG00000166426.7	ENSG00000166426	CRABP1		ENSG00000101290.9	ENSG00000101290	CDS2
				ENSG00000164330.12	ENSG00000164330	EBF1		ENSG00000166848.5	ENSG00000166848	TERF2IP		ENSG00000104112.4	ENSG00000104112	SCG3
				ENSG00000165029.11	ENSG00000165029	ABCA1		ENSG00000166974.8	ENSG00000166974	MAPRE2		ENSG00000110906.8	ENSG00000110906	KCTD10
				ENSG00000165434.6	ENSG00000165434	PGM2L1		ENSG00000167654.13	ENSG00000167654	ATCAY		ENSG00000114115.5	ENSG00000114115	RBP1
				ENSG00000166426.7	ENSG00000166426	CRABP1		ENSG00000167765.3	ENSG00000167765			ENSG00000115756.8	ENSG00000115756	HPCAL1
				ENSG00000167771.5	ENSG00000167771	RCOR2		ENSG00000168280.12	ENSG00000168280	KIF5C		ENSG00000118473.17	ENSG00000118473	SGIP1
				ENSG00000167900.7	ENSG00000167900	TK1		ENSG00000169085.7	ENSG00000169085	C8orf46		ENSG00000119705.5	ENSG00000119705	SLIRP
				ENSG00000168772.9	ENSG00000168772	CXXC4		ENSG00000169855.15	ENSG00000169855	ROBO1		ENSG00000132872.7	ENSG00000132872	SYT4
				ENSG00000169085.7	ENSG00000169085	C8orf46		ENSG00000169856.7	ENSG00000169856	ONECUT1		ENSG00000143257.7	ENSG00000143257	NR1I3
				ENSG00000169856.7	ENSG00000169856	ONECUT1		ENSG00000171533.7	ENSG00000171533	MAP6		ENSG00000153253.11	ENSG00000153253	SCN3A
				ENSG00000170522.5	ENSG00000170522	ELOVL6		ENSG00000171786.5	ENSG00000171786	NHLH1		ENSG00000154639.14	ENSG00000154639	CXADR
				ENSG00000171533.7	ENSG00000171533	MAP6		ENSG00000173221.9	ENSG00000173221	GLRX		ENSG00000156011.12	ENSG00000156011	PSD3
				ENSG00000175792.7	ENSG00000175792	RUVBL1		ENSG00000173267.9	ENSG00000173267	SNCG		ENSG00000157827.15	ENSG00000157827	FMNL2
				ENSG00000176887.5	ENSG00000176887	SOX11		ENSG00000176887.5	ENSG00000176887	SOX11		ENSG00000162188.5	ENSG00000162188	GNG3
				ENSG00000181965.4	ENSG00000181965	NEUROG1		ENSG00000186469.4	ENSG00000186469	GNG2		ENSG00000167613.11	ENSG00000167613	LAIR1
				ENSG00000182827.8	ENSG00000182827	ACBD3		ENSG00000186487.13	ENSG00000186487	MYT1L		ENSG00000167680.11	ENSG00000167680	SEMA6B
				ENSG00000184009.5	ENSG00000184009	ACTG1		ENSG00000187323.7	ENSG00000187323	DCC		ENSG00000196656.6	ENSG00000196656
				ENSG00000184384.9	ENSG00000184384	MAML2		ENSG00000188305.4	ENSG00000188305	C19orf35		ENSG00000198237.7	ENSG00000198237
				ENSG00000185985.7	ENSG00000185985	SLITRK2		ENSG00000188375.3	ENSG00000188375	H3F3C		ENSG00000204241.3	ENSG00000204241
				ENSG00000187951.6	ENSG00000187951	ARHGAP11B		ENSG00000196361.5	ENSG00000196361	ELAVL3		ENSG00000206567.5	ENSG00000206567
				ENSG00000198719.7	ENSG00000198719	DLL1		ENSG00000197061.3	ENSG00000197061	HIST1H4C		ENSG00000223579.2	ENSG00000223579
				ENSG00000204160.7	ENSG00000204160	ZDHHC18		ENSG00000197183.8	ENSG00000197183	NOL4L		ENSG00000224712.6	ENSG00000224712	NPIPA3
				ENSG00000205542.6	ENSG00000205542	TMSB4X		ENSG00000197410.8	ENSG00000197410	DCHS2		ENSG00000227558.4	ENSG00000227558
				ENSG00000225137.1	ENSG00000225137	DYNC1I2P1		ENSG00000204794.6	ENSG00000204794			ENSG00000235493.1	ENSG00000235493	LINC01967
				ENSG00000225783.2	ENSG00000225783	MIAT		ENSG00000205542.6	ENSG00000205542	TMSB4X		ENSG00000236552.1	ENSG00000236552	RPL13AP5
				ENSG00000231434.1	ENSG00000231434			ENSG00000205572.5	ENSG00000205572	SERF1B		ENSG00000242267.2	ENSG00000242267	SKINT1L
				ENSG00000231747.1	ENSG00000231747			ENSG00000205593.7	ENSG00000205593	DENND6B		ENSG00000249264.1	ENSG00000249264	EEF1A1P9
				ENSG00000233101.6	ENSG00000233101	HOXB-AS3		ENSG00000213190.2	ENSG00000213190	MLLT11		ENSG00000253366.2	ENSG00000253366
				ENSG00000236264.3	ENSG00000236264	RPL26P30		ENSG00000215630.5	ENSG00000215630	GUSBP9		ENSG00000253712.1	ENSG00000253712
				ENSG00000248265.1	ENSG00000248265			ENSG00000221818.4	ENSG00000221818	EBF2		ENSG00000254687.1	ENSG00000254687
				ENSG00000250208.2	ENSG00000250208	FZD10-AS1		ENSG00000223579.2	ENSG00000223579			ENSG00000258363.2	ENSG00000258363
				ENSG00000250305.4	ENSG00000250305	KIAA1456		ENSG00000224838.2	ENSG00000224838			ENSG00000260747.1	ENSG00000260747
				ENSG00000250472.1	ENSG00000250472	TRIM36-IT1		ENSG00000225783.2	ENSG00000225783	MIAT		ENSG00000273274.1	ENSG00000273274	ZBTB8B
				ENSG00000250742.1	ENSG00000250742	LINC02381		ENSG00000234520.1	ENSG00000234520			ENSG00000139618.10	ENSG00000139618	BRCA2
				ENSG00000253366.2	ENSG00000253366			ENSG00000243069.3	ENSG00000243069	ARHGEF26-AS1		ENSG00000144354.9	ENSG00000144354	CDCA7
				ENSG00000256463.4	ENSG00000256463	SALL3		ENSG00000250305.4	ENSG00000250305	KIAA1456		ENSG00000164171.6	ENSG00000164171	ITGA2
				ENSG00000260912.1	ENSG00000260912			ENSG00000250472.1	ENSG00000250472	TRIM36-IT1
								ENSG00000253230.2	ENSG00000253230	LINC00599
								ENSG00000253366.2	ENSG00000253366
								ENSG00000254044.1	ENSG00000254044
								ENSG00000258947.2	ENSG00000258947	TUBB3
								ENSG00000260473.1	ENSG00000260473
								ENSG00000269821.1	ENSG00000269821	KCNQ1OT1

## Sheet: Table_S7
gene set 1				gene set 2
gencode_id	ensembl_gene_id	hgnc_symbol		gencode_id	ensembl_gene_id	hgnc_symbol
ENSG00000165556.9	ENSG00000165556	CDX2		ENSG00000160097.11	ENSG00000160097	FNDC5
ENSG00000120708.12	ENSG00000120708	TGFBI		ENSG00000147488.7	ENSG00000147488	ST18
ENSG00000114529.8	ENSG00000114529	C3orf52		ENSG00000187323.7	ENSG00000187323	DCC
ENSG00000037965.4	ENSG00000037965	HOXC8		ENSG00000005108.11	ENSG00000005108	THSD7A
ENSG00000128652.7	ENSG00000128652	HOXD3		ENSG00000163531.11	ENSG00000163531	NFASC
ENSG00000180806.4	ENSG00000180806	HOXC9		ENSG00000184144.5	ENSG00000184144	CNTN2
ENSG00000078399.11	ENSG00000078399	HOXA9		ENSG00000139970.12	ENSG00000139970	RTN1
ENSG00000180818.4	ENSG00000180818	HOXC10		ENSG00000151320.6	ENSG00000151320	AKAP6
ENSG00000182667.10	ENSG00000182667	NTM		ENSG00000163618.13	ENSG00000163618	CADPS
ENSG00000185885.11	ENSG00000185885	IFITM1		ENSG00000139767.4	ENSG00000139767	SRRM4
ENSG00000118257.12	ENSG00000118257	NRP2		ENSG00000132872.7	ENSG00000132872	SYT4
ENSG00000256463.4	ENSG00000256463	SALL3		ENSG00000072041.12	ENSG00000072041	SLC6A15
ENSG00000139800.8	ENSG00000139800	ZIC5		ENSG00000123307.3	ENSG00000123307	NEUROD4
ENSG00000100321.10	ENSG00000100321	SYNGR1		ENSG00000171786.5	ENSG00000171786	NHLH1
ENSG00000206579.7	ENSG00000206579	XKR4		ENSG00000169085.7	ENSG00000169085	C8orf46
ENSG00000163191.5	ENSG00000163191	S100A11		ENSG00000198719.7	ENSG00000198719	DLL1
ENSG00000198075.5	ENSG00000198075	SULT1C4		ENSG00000136267.9	ENSG00000136267	DGKB
ENSG00000105997.18	ENSG00000105997	HOXA3		ENSG00000090932.6	ENSG00000090932	DLL3
ENSG00000114251.9	ENSG00000114251	WNT5A		ENSG00000064300.4	ENSG00000064300	NGFR
ENSG00000130066.12	ENSG00000130066	SAT1		ENSG00000196361.5	ENSG00000196361	ELAVL3
ENSG00000171843.11	ENSG00000171843	MLLT3		ENSG00000169856.7	ENSG00000169856	ONECUT1
ENSG00000113140.6	ENSG00000113140	SPARC		ENSG00000181965.4	ENSG00000181965	NEUROG1
ENSG00000118971.3	ENSG00000118971	CCND2		ENSG00000111218.7	ENSG00000111218	PRMT8
ENSG00000043355.6	ENSG00000043355	ZIC2		ENSG00000221818.4	ENSG00000221818	EBF2
ENSG00000145147.15	ENSG00000145147	SLIT2		ENSG00000108001.9	ENSG00000108001	EBF3
ENSG00000166710.13	ENSG00000166710	B2M		ENSG00000077279.12	ENSG00000077279	DCX
ENSG00000103449.7	ENSG00000103449	SALL1		ENSG00000078018.15	ENSG00000078018	MAP2
ENSG00000174469.13	ENSG00000174469	CNTNAP2		ENSG00000115310.13	ENSG00000115310	RTN4
ENSG00000113361.8	ENSG00000113361	CDH6		ENSG00000213190.2	ENSG00000213190	MLLT11
ENSG00000139318.7	ENSG00000139318	DUSP6		ENSG00000151914.13	ENSG00000151914	DST
ENSG00000096696.9	ENSG00000096696	DSP		ENSG00000154639.14	ENSG00000154639	CXADR
ENSG00000152268.8	ENSG00000152268			ENSG00000105426.10	ENSG00000105426	PTPRS
ENSG00000213965.3	ENSG00000213965	NUDT19		ENSG00000117569.14	ENSG00000117569	PTBP2
ENSG00000139364.6	ENSG00000139364	TMEM132B		ENSG00000124766.4	ENSG00000124766	SOX4
ENSG00000165443.7	ENSG00000165443	PHYHIPL		ENSG00000108654.7	ENSG00000108654	DDX5
ENSG00000187955.7	ENSG00000187955	COL14A1		ENSG00000094916.9	ENSG00000094916	CBX5
ENSG00000235609.4	ENSG00000235609			ENSG00000176887.5	ENSG00000176887	SOX11
ENSG00000150275.13	ENSG00000150275	PCDH15		ENSG00000134986.9	ENSG00000134986	NREP
ENSG00000157542.8	ENSG00000157542	KCNJ6		ENSG00000092847.6	ENSG00000092847	AGO1
ENSG00000110042.3	ENSG00000110042	DTX4		ENSG00000170522.5	ENSG00000170522	ELOVL6
ENSG00000139116.13	ENSG00000139116	KIF21A		ENSG00000079459.8	ENSG00000079459	FDFT1
ENSG00000144749.9	ENSG00000144749	LRIG1		ENSG00000269821.1	ENSG00000269821	KCNQ1OT1
ENSG00000121570.8	ENSG00000121570	DPPA4		ENSG00000109046.10	ENSG00000109046	WSB1
ENSG00000007372.16	ENSG00000007372	PAX6		ENSG00000100592.11	ENSG00000100592	DAAM1
ENSG00000125430.4	ENSG00000125430	HS3ST3B1		ENSG00000103187.6	ENSG00000103187	COTL1
ENSG00000166426.7	ENSG00000166426	CRABP1		ENSG00000225783.2	ENSG00000225783	MIAT
ENSG00000143995.15	ENSG00000143995	MEIS1		ENSG00000149294.12	ENSG00000149294	NCAM1
ENSG00000145423.4	ENSG00000145423	SFRP2		ENSG00000134313.10	ENSG00000134313	KIDINS220
ENSG00000104490.13	ENSG00000104490	NCALD		ENSG00000197183.8	ENSG00000197183	NOL4L
ENSG00000180592.12	ENSG00000180592	SKIDA1		ENSG00000144369.8	ENSG00000144369	FAM171B
ENSG00000184349.8	ENSG00000184349	EFNA5		ENSG00000115963.9	ENSG00000115963	RND3
ENSG00000148200.12	ENSG00000148200	NR6A1		ENSG00000139289.9	ENSG00000139289	PHLDA1
ENSG00000205542.6	ENSG00000205542	TMSB4X		ENSG00000104435.9	ENSG00000104435	STMN2
ENSG00000166450.8	ENSG00000166450	PRTG		ENSG00000079102.12	ENSG00000079102	RUNX1T1
				ENSG00000117707.11	ENSG00000117707	PROX1
				ENSG00000100647.7	ENSG00000100647	SUSD6
				ENSG00000131149.13	ENSG00000131149	GSE1
				ENSG00000091972.14	ENSG00000091972	CD200
				ENSG00000114796.11	ENSG00000114796	KLHL24
				ENSG00000171533.7	ENSG00000171533	MAP6
				ENSG00000168280.12	ENSG00000168280	KIF5C
				ENSG00000067715.9	ENSG00000067715	SYT1
				ENSG00000166848.5	ENSG00000166848	TERF2IP
				ENSG00000155980.7	ENSG00000155980	KIF5A
				ENSG00000151150.16	ENSG00000151150	ANK3
				ENSG00000092421.12	ENSG00000092421	SEMA6A
				ENSG00000144724.14	ENSG00000144724	PTPRG
				ENSG00000174136.7	ENSG00000174136	RGMB
				ENSG00000148798.5	ENSG00000148798	INA
				ENSG00000164330.12	ENSG00000164330	EBF1
				ENSG00000107105.10	ENSG00000107105	ELAVL2
				ENSG00000144834.8	ENSG00000144834	TAGLN3
				ENSG00000162374.12	ENSG00000162374	ELAVL4
				ENSG00000119547.5	ENSG00000119547	ONECUT2
				ENSG00000118263.10	ENSG00000118263	KLF7
				ENSG00000104725.9	ENSG00000104725
				ENSG00000104722.9	ENSG00000104722	NEFM
				ENSG00000129315.5	ENSG00000129315	CCNT1
				ENSG00000108828.11	ENSG00000108828	VAT1
				ENSG00000165029.11	ENSG00000165029	ABCA1
				ENSG00000166963.8	ENSG00000166963	MAP1A
				ENSG00000152503.5	ENSG00000152503	TRIM36
				ENSG00000186469.4	ENSG00000186469	GNG2
				ENSG00000137343.13	ENSG00000137343	ATAT1
				ENSG00000170802.11	ENSG00000170802	FOXN2
				ENSG00000157827.15	ENSG00000157827	FMNL2
				ENSG00000139910.15	ENSG00000139910	NOVA1
				ENSG00000163644.10	ENSG00000163644	PPM1K
				ENSG00000136160.10	ENSG00000136160	EDNRB
				ENSG00000137872.11	ENSG00000137872	SEMA6D
				ENSG00000166974.8	ENSG00000166974	MAPRE2
				ENSG00000165434.6	ENSG00000165434	PGM2L1
				ENSG00000163539.11	ENSG00000163539	CLASP2
				ENSG00000143702.11	ENSG00000143702	CEP170
				ENSG00000169855.15	ENSG00000169855	ROBO1
				ENSG00000114115.5	ENSG00000114115	RBP1
				ENSG00000018189.8	ENSG00000018189	RUFY3
				ENSG00000156011.12	ENSG00000156011	PSD3
				ENSG00000145362.12	ENSG00000145362	ANK2
				ENSG00000129757.8	ENSG00000129757	CDKN1C
				ENSG00000113657.8	ENSG00000113657	DPYSL3
				ENSG00000143333.6	ENSG00000143333	RGS16
				ENSG00000144485.6	ENSG00000144485	HES6
				ENSG00000135862.5	ENSG00000135862	LAMC1
				ENSG00000120162.9	ENSG00000120162	MOB3B
				ENSG00000123213.18	ENSG00000123213	NLN
				ENSG00000152684.10	ENSG00000152684	PELO
				ENSG00000054965.6	ENSG00000054965	FAM168A
				ENSG00000151746.9	ENSG00000151746	BICD1
				ENSG00000109472.9	ENSG00000109472	CPE
				ENSG00000132639.8	ENSG00000132639	SNAP25
				ENSG00000128641.13	ENSG00000128641	MYO1B
				ENSG00000160145.11	ENSG00000160145	KALRN
				ENSG00000250305.4	ENSG00000250305	KIAA1456
				ENSG00000138670.12	ENSG00000138670	RASGEF1B
				ENSG00000078699.17	ENSG00000078699	CBFA2T2
				ENSG00000187672.8	ENSG00000187672	ERC2
				ENSG00000173221.9	ENSG00000173221	GLRX
				ENSG00000004866.14	ENSG00000004866	ST7
				ENSG00000176641.6	ENSG00000176641	RNF152
				ENSG00000111052.3	ENSG00000111052	LIN7A
				ENSG00000003987.9	ENSG00000003987	MTMR7
				ENSG00000104112.4	ENSG00000104112	SCG3
				ENSG00000204160.7	ENSG00000204160	ZDHHC18
				ENSG00000197410.8	ENSG00000197410	DCHS2
				ENSG00000131037.10	ENSG00000131037	EPS8L1
				ENSG00000164796.13	ENSG00000164796	CSMD3
				ENSG00000065609.10	ENSG00000065609	SNAP91
				ENSG00000101489.14	ENSG00000101489	CELF4
				ENSG00000153253.11	ENSG00000153253	SCN3A
				ENSG00000109991.4	ENSG00000109991	P2RX3
				ENSG00000177551.5	ENSG00000177551	NHLH2
				ENSG00000118473.17	ENSG00000118473	SGIP1
				ENSG00000187134.8	ENSG00000187134	AKR1C1
				ENSG00000186487.13	ENSG00000186487	MYT1L
				ENSG00000253230.2	ENSG00000253230	LINC00599
				ENSG00000260230.2	ENSG00000260230	FRRS1L
				ENSG00000123240.12	ENSG00000123240	OPTN
				ENSG00000173267.9	ENSG00000173267	SNCG
				ENSG00000162188.5	ENSG00000162188	GNG3
				ENSG00000133958.9	ENSG00000133958	UNC79
				ENSG00000167654.13	ENSG00000167654	ATCAY
				ENSG00000028277.16	ENSG00000028277	POU2F2
				ENSG00000123560.9	ENSG00000123560	PLP1
				ENSG00000117724.8	ENSG00000117724	CENPF
				ENSG00000104381.8	ENSG00000104381	GDAP1
				ENSG00000168772.9	ENSG00000168772	CXXC4
				ENSG00000148516.17	ENSG00000148516	ZEB1
				ENSG00000084093.11	ENSG00000084093	REST
				ENSG00000148053.11	ENSG00000148053	NTRK2
				ENSG00000185985.7	ENSG00000185985	SLITRK2
				ENSG00000070214.11	ENSG00000070214	SLC44A1
				ENSG00000091542.8	ENSG00000091542	ALKBH5
				ENSG00000149948.9	ENSG00000149948	HMGA2
				ENSG00000142230.7	ENSG00000142230	SAE1
				ENSG00000114978.13	ENSG00000114978	MOB1A
				ENSG00000064651.9	ENSG00000064651	SLC12A2
				ENSG00000198668.6	ENSG00000198668	CALM1
				ENSG00000119969.10	ENSG00000119969	HELLS

## Sheet: Table_S8
195 differential expressed transcription factors after combining all the time points from day 0 to day 30				Differential expressed transcription factors between subpopulations of a given time point
gencode_id	ensembl_gene_id	hgnc_symbol		Day 0(a and b subpopulation, 26 TFs)				Day 1(a, b and c subpopulation, 86 TFs)				Day 5(ab and c subpopulation, 63 TFs)				Day 7(ab and c subpopulation, 41 TFs)				Day 10(ab and c subpopulation, 27 TFs)				Day 30(ab and c subpopulation, 29 TFs)
ENSG00000143995.15	ENSG00000143995	MEIS1		gencode_id	ensembl_gene_id	hgnc_symbol		gencode_id	ensembl_gene_id	hgnc_symbol		gencode_id	ensembl_gene_id	hgnc_symbol		gencode_id	ensembl_gene_id	hgnc_symbol		gencode_id	ensembl_gene_id	hgnc_symbol		gencode_id	ensembl_gene_id	hgnc_symbol
ENSG00000105997.18	ENSG00000105997	HOXA3		ENSG00000165556.9	ENSG00000165556	CDX2		ENSG00000165556.9	ENSG00000165556	CDX2		ENSG00000078399.11	ENSG00000078399	HOXA9		ENSG00000119547.5	ENSG00000119547	ONECUT2		ENSG00000124766.4	ENSG00000124766	SOX4		ENSG00000124766.4	ENSG00000124766	SOX4
ENSG00000180806.4	ENSG00000180806	HOXC9		ENSG00000105997.18	ENSG00000105997	HOXA3		ENSG00000152784.11	ENSG00000152784	PRDM8		ENSG00000085276.13	ENSG00000085276	MECOM		ENSG00000169856.7	ENSG00000169856	ONECUT1		ENSG00000177551.5	ENSG00000177551	NHLH2		ENSG00000028277.16	ENSG00000028277	POU2F2
ENSG00000037965.4	ENSG00000037965	HOXC8		ENSG00000120093.7	ENSG00000120093	HOXB3		ENSG00000043355.6	ENSG00000043355	ZIC2		ENSG00000106004.4	ENSG00000106004	HOXA5		ENSG00000124766.4	ENSG00000124766	SOX4		ENSG00000147488.7	ENSG00000147488	ST18		ENSG00000176887.5	ENSG00000176887	SOX11
ENSG00000007372.16	ENSG00000007372	PAX6		ENSG00000182742.5	ENSG00000182742	HOXB4		ENSG00000144485.6	ENSG00000144485	HES6		ENSG00000116731.18	ENSG00000116731	PRDM2		ENSG00000176887.5	ENSG00000176887	SOX11		ENSG00000164330.12	ENSG00000164330	EBF1		ENSG00000119547.5	ENSG00000119547	ONECUT2
ENSG00000134138.15	ENSG00000134138	MEIS2		ENSG00000180818.4	ENSG00000180818	HOXC10		ENSG00000164104.7	ENSG00000164104	HMGB2		ENSG00000118495.14	ENSG00000118495	PLAGL1		ENSG00000221818.4	ENSG00000221818	EBF2		ENSG00000176887.5	ENSG00000176887	SOX11		ENSG00000118263.10	ENSG00000118263	KLF7
ENSG00000043355.6	ENSG00000043355	ZIC2		ENSG00000037965.4	ENSG00000037965	HOXC8		ENSG00000111783.8	ENSG00000111783	RFX4		ENSG00000124766.4	ENSG00000124766	SOX4		ENSG00000177551.5	ENSG00000177551	NHLH2		ENSG00000159905.10	ENSG00000159905	ZNF221		ENSG00000137203.6	ENSG00000137203	TFAP2A
ENSG00000165556.9	ENSG00000165556	CDX2		ENSG00000180806.4	ENSG00000180806	HOXC9		ENSG00000169856.7	ENSG00000169856	ONECUT1		ENSG00000134138.15	ENSG00000134138	MEIS2		ENSG00000108001.9	ENSG00000108001	EBF3		ENSG00000196922.6	ENSG00000196922	ZNF252P		ENSG00000147488.7	ENSG00000147488	ST18
ENSG00000180818.4	ENSG00000180818	HOXC10		ENSG00000128652.7	ENSG00000128652	HOXD3		ENSG00000115738.5	ENSG00000115738	ID2		ENSG00000142556.14	ENSG00000142556	ZNF614		ENSG00000173404.3	ENSG00000173404	INSM1		ENSG00000111206.8	ENSG00000111206	FOXM1		ENSG00000117139.12	ENSG00000117139	KDM5B
ENSG00000139800.8	ENSG00000139800	ZIC5		ENSG00000170561.8	ENSG00000170561	IRX2		ENSG00000168310.6	ENSG00000168310	IRF2		ENSG00000156273.11	ENSG00000156273	BACH1		ENSG00000123307.3	ENSG00000123307	NEUROD4		ENSG00000028277.16	ENSG00000028277	POU2F2		ENSG00000103449.7	ENSG00000103449	SALL1
ENSG00000177508.11	ENSG00000177508	IRX3		ENSG00000177508.11	ENSG00000177508	IRX3		ENSG00000164330.12	ENSG00000164330	EBF1		ENSG00000164330.12	ENSG00000164330	EBF1		ENSG00000196132.7	ENSG00000196132	MYT1		ENSG00000119547.5	ENSG00000119547	ONECUT2		ENSG00000186487.13	ENSG00000186487	MYT1L
ENSG00000128652.7	ENSG00000128652	HOXD3		ENSG00000176542.5	ENSG00000176542	USF3		ENSG00000189403.10	ENSG00000189403	HMGB1		ENSG00000165821.7	ENSG00000165821	SALL2		ENSG00000171786.5	ENSG00000171786	NHLH1		ENSG00000116990.9	ENSG00000116990	MYCL		ENSG00000140836.10	ENSG00000140836	ZFHX3
ENSG00000189298.9	ENSG00000189298	ZKSCAN3		ENSG00000143995.15	ENSG00000143995	MEIS1		ENSG00000136870.6	ENSG00000136870	ZNF189		ENSG00000181896.7	ENSG00000181896	ZNF101		ENSG00000167232.9	ENSG00000167232	ZNF91		ENSG00000143995.15	ENSG00000143995	MEIS1		ENSG00000008083.9	ENSG00000008083	JARID2
ENSG00000170561.8	ENSG00000170561	IRX2		ENSG00000134138.15	ENSG00000134138	MEIS2		ENSG00000111206.8	ENSG00000111206	FOXM1		ENSG00000185630.14	ENSG00000185630	PBX1		ENSG00000126804.9	ENSG00000126804	ZBTB1		ENSG00000162992.3	ENSG00000162992	NEUROD1		ENSG00000077809.8	ENSG00000077809
ENSG00000120093.7	ENSG00000120093	HOXB3		ENSG00000082641.11	ENSG00000082641	NFE2L1		ENSG00000148200.12	ENSG00000148200	NR6A1		ENSG00000196428.8	ENSG00000196428	TSC22D2		ENSG00000118263.10	ENSG00000118263	KLF7		ENSG00000108001.9	ENSG00000108001	EBF3		ENSG00000084093.11	ENSG00000084093	REST
ENSG00000106536.15	ENSG00000106536	POU6F2		ENSG00000148200.12	ENSG00000148200	NR6A1		ENSG00000198464.9	ENSG00000198464	ZNF480		ENSG00000213988.5	ENSG00000213988	ZNF90		ENSG00000144485.6	ENSG00000144485	HES6		ENSG00000130522.4	ENSG00000130522	JUND		ENSG00000101126.11	ENSG00000101126	ADNP
ENSG00000198093.6	ENSG00000198093	ZNF649		ENSG00000007372.16	ENSG00000007372	PAX6		ENSG00000176887.5	ENSG00000176887	SOX11		ENSG00000173011.11	ENSG00000173011	TADA2B		ENSG00000178573.6	ENSG00000178573	MAF		ENSG00000170802.11	ENSG00000170802	FOXN2		ENSG00000125846.11	ENSG00000125846	ZNF133
ENSG00000182742.5	ENSG00000182742	HOXB4		ENSG00000106536.15	ENSG00000106536	POU6F2		ENSG00000110693.11	ENSG00000110693	SOX6		ENSG00000185252.13	ENSG00000185252	ZNF74		ENSG00000043355.6	ENSG00000043355	ZIC2		ENSG00000106571.8	ENSG00000106571	GLI3		ENSG00000160062.10	ENSG00000160062	ZBTB8A
ENSG00000186448.10	ENSG00000186448	ZNF197		ENSG00000103449.7	ENSG00000103449	SALL1		ENSG00000155592.11	ENSG00000155592	ZKSCAN2		ENSG00000185869.9	ENSG00000185869	ZNF829		ENSG00000164104.7	ENSG00000164104	HMGB2		ENSG00000171786.5	ENSG00000171786	NHLH1		ENSG00000170802.11	ENSG00000170802	FOXN2
ENSG00000089335.16	ENSG00000089335	ZNF302		ENSG00000092607.9	ENSG00000092607	TBX15		ENSG00000148516.17	ENSG00000148516	ZEB1		ENSG00000196724.8	ENSG00000196724	ZNF418		ENSG00000164330.12	ENSG00000164330	EBF1		ENSG00000198453.8	ENSG00000198453	ZNF568		ENSG00000170949.13	ENSG00000170949	ZNF160
ENSG00000103449.7	ENSG00000103449	SALL1		ENSG00000043355.6	ENSG00000043355	ZIC2		ENSG00000181965.4	ENSG00000181965	NEUROG1		ENSG00000198597.4	ENSG00000198597	ZNF536		ENSG00000179456.9	ENSG00000179456	ZBTB18		ENSG00000197124.7	ENSG00000197124	ZNF682		ENSG00000182318.5	ENSG00000182318	ZSCAN22
ENSG00000106261.12	ENSG00000106261	ZKSCAN1		ENSG00000139800.8	ENSG00000139800	ZIC5		ENSG00000037965.4	ENSG00000037965	HOXC8		ENSG00000119547.5	ENSG00000119547	ONECUT2		ENSG00000186487.13	ENSG00000186487	MYT1L		ENSG00000117139.12	ENSG00000117139	KDM5B		ENSG00000189298.9	ENSG00000189298	ZKSCAN3
ENSG00000148200.12	ENSG00000148200	NR6A1		ENSG00000106261.12	ENSG00000106261	ZKSCAN1		ENSG00000140262.13	ENSG00000140262	TCF12		ENSG00000147488.7	ENSG00000147488	ST18		ENSG00000197808.7	ENSG00000197808	ZNF461		ENSG00000084093.11	ENSG00000084093	REST		ENSG00000197937.8	ENSG00000197937	ZNF347
[truncated: 172 more rows]

## Sheet: Table_S9
138 differential expressed lincRNAs between subpopulaitons
gencode_id	ensembl_gene_id	hgnc_symbol
ENSG00000243069.3	ENSG00000243069	ARHGEF26-AS1
[truncated: 137 more rows]

## Sheet: Table_S10
Antibodies	Source	Catalog.NO.	Dilution
[truncated: 12 more rows]

[truncated: 1 more sheets: Table_S11]
